# Supplementary material for: Quantitative and Systems Pharmacology 3. Network-Based Identification of New Targets for Natural Products Enables Potential Uses in Aging-Associated Disorders
Source: Front Pharmacol. 2017 Oct 18;8:747. doi: 10.3389/fphar.2017.00747 (PMC5651538; doi:10.3389/fphar.2017.00747)
Supplement: Table S4 — The detailed information of two drug-target interaction (DTI) networks (a global DTI network and a specific DTI network for FDA-approved or clinically investigational natural products). [file DataSheet4.XLSX]

## Sheet: 17223 Known and predicted DTIs
Gene_name	Pubchem_CID	Gene_name	Canonical SMILES (Desalted)	Compound ID	InChI Key	DrugBank ID	Drug Group	Score	Rank
MAOB	1890	MAOB	Oc1ccc2c(c1)OC(CC2=O)c1ccccc1	UNPD75834	SWAJPHCXKPCPQZ-UHFFFAOYSA-N	#N/A	#N/A	0.011308	1
MAOB	2192	MAOB	O=C1C=CC2(C(=C1)CCC1C2CCC2(C1CCC2=O)C)C	UNPD161625	LUJVUUWNAPIQQI-UHFFFAOYSA-N	#N/A	#N/A	0.0111033	1
MAOB	2193	MAOB	O=C1CCC2(C(=C1)CCC1C2CCC2(C1CCC2=O)C)C	UNPD1193	AEMFNILZOJDQLW-UHFFFAOYSA-N	#N/A	#N/A	0.011094	1
ABCC1	68071	ABCC1	Oc1cc2O[C@@H](CC(=O)c2c(c1)O)c1ccccc1	ATCMD17345	URFCJEUYXNAHFI-ZDUSSCGKSA-N	#N/A	#N/A	0.00968452	1
MAOB	73440	MAOB	CC1=CC(=O)C2=C(C)CC[C@@H]3[C@@H]([C@@H]12)OC(=O)C3=C	ATCMD4930	SKNVIAFTENCNGB-BPNCWPANSA-N	#N/A	#N/A	0.0110966	1
MAOB	92775	MAOB	Oc1ccc2c(c1)O[C@@H](CC2=O)c1ccc(c(c1)O)O	ATCMD2780	MJBPUQUGJNAPAZ-AWEZNQCLSA-N	#N/A	#N/A	0.0112618	1
MAOB	114829	MAOB	Oc1ccc(cc1)[C@@H]1CC(=O)c2c(O1)cc(cc2)O	ATCMD12865	FURUXTVZLHCCNA-AWEZNQCLSA-N	DB03601	experimental	0.0112881	1
MAOB	124075	MAOB	COc1cc(=O)n(c2c1ccc1c2OCO1)C	UNPD60227	DPXXJCMMMXZVSW-UHFFFAOYSA-N	DB08744	experimental	0.0112269	1
MAOB	622979	MAOB	O=C1CCC2C1(C)CCC1C2CC=C2C1(C)CCC=C2	UNPD78901	NINLAYUXSUKKHW-UHFFFAOYSA-N	#N/A	#N/A	0.0110903	1
MAOB	5318585	MAOB	CC(=CCc1cc(ccc1O)c1oc2cc(O)cc(c2c(=O)c1O)O)C	UNPD17045	PGCKDCPTJAQQSQ-UHFFFAOYSA-N	#N/A	#N/A	0.0112321	1
MAOB	9862769	MAOB	CC(=CCc1c(O)ccc(c1O)C(=O)/C=C/c1ccc(cc1O)O)C	UNPD109435	NXBYIJSAISXPKJ-WEVVVXLNSA-N	#N/A	#N/A	0.0112389	1
MAOB	9866908	MAOB	CC(=CCc1cc(ccc1O)c1oc2c(CC=C(C)C)c(O)cc(c2c(=O)c1O)O)C	UNPD12025	KNMMNUQOUANAJS-UHFFFAOYSA-N	#N/A	#N/A	0.0112292	1
MAOB	10064832	MAOB	CC(=CCc1cc(ccc1O)C1CC(=O)c2c(O1)cc(cc2)O)C	UNPD134530	NLTOTZSPOYWSSP-UHFFFAOYSA-N	#N/A	#N/A	0.0112788	1
MAOB	10143276	MAOB	COc1cc(/C=C/C(=O)OC/C(=C/Cc2c(O)ccc(c2O)C(=O)/C=C/c2ccc(cc2O)O)/C)ccc1O	UNPD86377	OFKHJNZDWNKYOY-MNYVGDBSSA-N	#N/A	#N/A	0.0112211	1
MAOB	10228895	MAOB	C/C(=C\Cc1c(O)ccc(c1O)C(=O)/C=C/c1ccc(cc1O)O)/COC(=O)/C=C/c1ccc(cc1)O	UNPD56512	XXQUTHYOIGFGPG-MPKNGZDBSA-N	#N/A	#N/A	0.0112244	1
MAOB	10265122	MAOB	COc1ccc2c(c1)OC(CC2=O)c1ccc(cc1)O	UNPD177738	OJOSVTQXBSSCMQ-UHFFFAOYSA-N	#N/A	#N/A	0.0112841	1
MAOB	10291777	MAOB	Oc1ccc(c(c1)O)[C@@H]1CC(=O)c2c(O1)c1CC(Oc1cc2)C(O)(C)C	ATCMD5734	JXVOAHGNNBAJCD-ZENAZSQFSA-N	#N/A	#N/A	0.011199	1
MAOB	10356745	MAOB	Oc1ccc(c(c1)O)[C@@H]1CC(=O)c2c(O1)cc(cc2O)O	ATCMD20253	QBLQLKNOKUHRCH-ZDUSSCGKSA-N	#N/A	#N/A	0.011269	1
MAOB	14218027	MAOB	CC(=CCc1cc(ccc1O)C1CC(=O)c2c(O1)cc(cc2O)O)C	UNPD116351	CGKWSLSAYABZTL-UHFFFAOYSA-N	#N/A	#N/A	0.0112723	1
MAOB	16738021	MAOB	COc1ccc(cc1CC=C(C)C)C1CC(=O)c2c(O1)cc(cc2)O	UNPD197287	FPCMTBOAYZALFY-UHFFFAOYSA-N	#N/A	#N/A	0.0112713	1
MAOB	42611455	MAOB	Oc1cc(C)c2c(c1)OC(=O)c1c(O2)cc(cc1C)O	UNPD119738	KCAVPBLHZJMMLN-UHFFFAOYSA-N	#N/A	#N/A	0.0111618	1
MAOB	44567218	MAOB	CC1=C[C@@H]2c3c(O)cc(cc3O[C@]3(C2[C@H](C1)c1ccc(cc1O3)O)c1ccc(cc1O)O)c1oc2c(c1)ccc(c2)O	ATCMD845	MJJWBJFYYRAYKU-WLKQUGLZSA-N	#N/A	#N/A	0.0111291	1
MAOB	44593508	MAOB	CC(=CCc1c(O)ccc2c1O[C@@H](CC2=O)c1ccc(cc1O)O)C	ATCMD7467	JJOUBYOHNYJCOU-IBGZPJMESA-N	#N/A	#N/A	0.0112568	1
MAOB	76314886	MAOB	O=Cc1c2O[C@@H](C[C@H](c2c(c(c1O)C)OC)O)c1ccccc1	UNPD223742	DAAVAQORZATFQC-KGLIPLIRSA-N	#N/A	#N/A	0.011201	1
MAOB	76318503	MAOB	CO[C@@H]1C[C@H](Oc2c1c(OC)cc(c2C=O)O)c1ccccc1	UNPD221614	MTUMROJURBSRAM-GOEBONIOSA-N	#N/A	#N/A	0.0112088	1
MAOB	76322165	MAOB	O=Cc1c(O)cc(c2c1O[C@@H](C[C@H]2O)c1ccccc1)OC	UNPD215317	GKNIUEBTGOANEL-KGLIPLIRSA-N	#N/A	#N/A	0.0112056	1
MAOB	76322166	MAOB	CO[C@@H]1C[C@H](Oc2c1c(OC)c(c(c2C=O)O)C)c1ccccc1	UNPD225879	YQWKJLXULCUUKI-LSDHHAIUSA-N	#N/A	#N/A	0.0112041	1
MAOB	76325787	MAOB	O=Cc1c2O[C@@H](C[C@H](c2c(c(c1OC)C)OC)O)c1ccccc1	UNPD217391	WVVAUNLWXBWAFH-CABCVRRESA-N	#N/A	#N/A	0.011201	1
BCHE	342	BCHE	Cc1cccc(c1)O	UNPD76349	RLSSMJSEOOYNOY-UHFFFAOYSA-N	DB01776	experimental	0.0330274	1
BCHE	2879	BCHE	Cc1ccc(cc1)O	UNPD155708	IWDCLRJOBJJRNH-UHFFFAOYSA-N	DB01688	experimental	0.0330362	1
MAPT	3314	MAPT	C=CCc1ccc(c(c1)OC)O	UNPD45145	RRAFCDWBNXTKKO-UHFFFAOYSA-N	DB09086	approved	0.0117563	1
MAPT	4276	MAPT	C=CCc1cc(OC)c2c(c1)OCO2	UNPD109402	BNWJOHGLIBDBOB-UHFFFAOYSA-N	#N/A	#N/A	0.0117966	1
MAPT	4825	MAPT	COc1c(OC)c2occc2c2c1ccc(=O)o2	UNPD109119	BQPRWZCEKZLBHL-UHFFFAOYSA-N	#N/A	#N/A	0.011817	1
BCHE	7237	BCHE	Cc1ccccc1C	UNPD47904	CTQNGGLPUBDAKN-UHFFFAOYSA-N	#N/A	#N/A	0.033037	1
LMNA	7505	LMNA	N#Cc1ccccc1	UNPD16424	JFDZBHWFFUWGJE-UHFFFAOYSA-N	#N/A	#N/A	0.0106824	1
BCHE	7731	BCHE	COc1ccc(cc1)C	UNPD172394	CHLICZRVGGXEOD-UHFFFAOYSA-N	#N/A	#N/A	0.0330475	1
BCHE	7809	BCHE	Cc1ccc(cc1)C	UNPD94965	URLKBWYHVLBVBO-UHFFFAOYSA-N	#N/A	#N/A	0.0330073	1
BCHE	7813	BCHE	Cc1ccc(cc1)N	UNPD158878	RZXMPPFPUUCRFN-UHFFFAOYSA-N	#N/A	#N/A	0.0330017	1
BCHE	7929	BCHE	Cc1cccc(c1)C	UNPD182929	IVSZLXZYQVIEFR-UHFFFAOYSA-N	#N/A	#N/A	0.0331151	1
MAPT	10212	MAPT	CC(=CCOc1c2occc2cc2c1oc(=O)cc2)C	UNPD42517	OLOOJGVNMBJLLR-UHFFFAOYSA-N	#N/A	#N/A	0.011751	1
ABCC1	31423	ABCC1	c1cc2ccc3c4c2c(c1)ccc4ccc3	UNPD16051	BBEAQIROQSPTKN-UHFFFAOYSA-N	#N/A	#N/A	0.00932512	1
MAPT	68073	MAPT	CC(=O)c1c(O)cc(cc1O)O	UNPD133987	XLEYFDVVXLMULC-UHFFFAOYSA-N	#N/A	#N/A	0.0117673	1
MAPT	68079	MAPT	COc1c2ccc(=O)oc2c(c2c1cco2)OC	UNPD80777	DFMAXQKDIGCMTL-UHFFFAOYSA-N	#N/A	#N/A	0.0117951	1
BCHE	68126	BCHE	COc1cc(C)ccc1OC	UNPD44845	GYPMBQZAVBFUIZ-UHFFFAOYSA-N	#N/A	#N/A	0.0330539	1
ABCG2	79730	ABCG2	COc1ccc(cc1)c1cc(=O)c2c(o1)cc(cc2OC)OC	UNPD121764	ZXJJBDHPUHUUHD-UHFFFAOYSA-N	#N/A	#N/A	0.0145303	1
BCHE	80922	BCHE	COc1c(OC)cc(cc1OC)C	UNPD193753	KCIZTNZGSBSSRM-UHFFFAOYSA-N	#N/A	#N/A	0.033044	1
MAPT	99652	MAPT	CNc1ccccc1C(=O)N1CCc2c(C1=O)[nH]c1c2cccc1	UNPD58550	RAEOYMOPVHBBKE-UHFFFAOYSA-N	#N/A	#N/A	0.0115364	1
MAPT	101277	MAPT	COc1cc2OCOc2cc1c1cc2cc3ccoc3cc2oc1=O	UNPD99188	PENSQRMNZZWMGV-UHFFFAOYSA-N	#N/A	#N/A	0.0118212	1
MAPT	117443	MAPT	O[C@H]1OC[C@@H]([C@H]1Cc1ccc2c(c1)OCO2)Cc1ccc2c(c1)OCO2	ATCMD4296	DIYWRNLYKJKHAM-MDOVXXIYSA-N	#N/A	#N/A	0.0117003	1
MAPT	124052	MAPT	Oc1ccc(c(c1)O)[C@@H]1COc2c(C1)ccc1c2C=CC(O1)(C)C	ATCMD8473	LBQIJVLKGVZRIW-ZDUSSCGKSA-N	#N/A	#N/A	0.0116253	1
MAPT	135952	MAPT	CC(=O)Oc1cc(OC(=O)C)c2c(c1)oc(cc2=O)c1ccc(c(c1)OC(=O)C)OC(=O)C	UNPD149661	MABQMQKDSPCURQ-UHFFFAOYSA-N	#N/A	#N/A	0.0118109	1
MAPT	151529	MAPT	COc1cc2c(c(c1OC)OC)c1c(cc3c(c1OC)OCO3)C[C@@H]([C@]([C@H]2OC(=O)c1ccccc1)(C)O)C	ATCMD8888	UFCGDBKFOKKVAC-DSASHONVSA-N	#N/A	#N/A	0.0116224	1
ABCG2	154227	ABCG2	COc1ccc2c(c1)oc(cc2=O)c1ccc(c(c1)OC)OC	UNPD95921	VSFZYCDPDWSYSS-UHFFFAOYSA-N	#N/A	#N/A	0.014767	1
ABCC1	160481	ABCC1	COc1ccc(cc1)[C@@H]1CC(=O)c2c(O1)cc(cc2O)O	ATCMD11654	HMUJXQRRKBLVOO-AWEZNQCLSA-N	#N/A	#N/A	0.0122935	1
LMNA	161749	LMNA	COc1ccc2c(c1)c1cc(O)c(cc1c1c2[C@H](O)[C@@H]2CCCN2C1)OC	ATCMD22072	CMFIDYCYVJWPPL-PGRDOPGGSA-N	#N/A	#N/A	0.000400095	1
ABCG2	185670	ABCG2	COc1c(OC)cc(cc1OC)c1cc(=O)c2c(o1)cc(c(c2OC)OC)OC	UNPD48693	DYDFNKUHYXHWFM-UHFFFAOYSA-N	#N/A	#N/A	0.0144356	1
MAPT	193042	MAPT	OC[C@@H]([C@@H](Cc1ccc2c(c1)OCO2)CO)Cc1ccc2c(c1)OCO2	ATCMD5561	JKCVMTYNARDGET-HOTGVXAUSA-N	#N/A	#N/A	0.0117195	1
BCHE	215159	BCHE	COc1cc(CCN(C)C)c2c3c1oc(=O)c1c3c(oc2=O)c(cc1)OC	UNPD194560	MTAWKURMWOXCEO-UHFFFAOYSA-N	#N/A	#N/A	0.0331211	1
MAPT	229852	MAPT	COC1=CC(=O)OC(C1)CCc1ccc2c(c1)OCO2	UNPD108759	RSIWXFIBHXYNFM-UHFFFAOYSA-N	#N/A	#N/A	0.011697	1
MAPT	261859	MAPT	COc1c(OC)cc(cc1OC)c1cc(=O)c2c(o1)c(OC)c(c(c2O)OC)OC	UNPD152957	MQBFFYQCZCKSBX-UHFFFAOYSA-N	#N/A	#N/A	0.01179	1
LMNA	264751	LMNA	COc1ccc2c(c1)c1cc(OC)c(cc1c1c2[C@@H](O)[C@@H]2CCCN2C1)OC	TCMID131	LAWAARLALKUFQQ-CVDCTZTESA-N	#N/A	#N/A	0.000407462	1
MAPT	326186	MAPT	COc1cc(OC)c(c(c1C(=O)C)O)C	UNPD138258	AAOFJKLTRKOQTQ-UHFFFAOYSA-N	#N/A	#N/A	0.0117656	1
MAPT	345501	MAPT	COc1cc(cc(c1OC)OC)[C@H]1[C@H]2C(=O)OC[C@@H]2Cc2c1cc1OCOc1c2	ATCMD1368	ZGLXUQQMLLIKAN-SVIJTADQSA-N	#N/A	#N/A	0.0115831	1
MAOB	442428	MAOB	OC[C@H]1O[C@@H](Oc2cc(O)c3c(c2)O[C@@H](CC3=O)c2ccc(cc2)O)[C@@H]([C@H]([C@@H]1O)O)O[C@@H]1O[C@@H](C)[C@@H]([C@H]([C@H]1O)O)O	TCMID9022	DFPMSGMNTNDNHN-ZPHOTFPESA-N	#N/A	#N/A	0.0056871	1
MAPT	442835	MAPT	COc1cc(C[C@H]2C(=O)OC[C@@H]2Cc2ccc3c(c2)OCO3)cc(c1OC)OC	ATCMD5532	GMLDZDDTZKXJLU-JKSUJKDBSA-N	#N/A	#N/A	0.0116196	1
BCHE	442894	BCHE	C1CC2=Nc3c(CN2C1)cccc3	UNPD108656	WUFQLZTXIWKION-UHFFFAOYSA-N	#N/A	#N/A	0.0333731	1
BCHE	443725	BCHE	COc1cc2c(cc1OC)CN1c3c2cccc3CC1	UNPD165905	JSGDAMUNBMFHFH-UHFFFAOYSA-N	#N/A	#N/A	0.0332376	1
ABCG2	493376	ABCG2	COc1cc(OC)c2c(c1)oc(cc2=O)c1cc(OC)c(c(c1)OC)OC	UNPD100132	GIKVSFNAEBQLGB-UHFFFAOYSA-N	#N/A	#N/A	0.0143872	1
BCHE	639465	BCHE	C/C(=C\Cc1c(O)cc2c(c1O)C(=O)C[C@H](O2)c1ccc(c(c1)O)O)/CCC=C(C)C	UNPD216068	XCYSQFHYFNWYFP-CEMXSPGASA-N	#N/A	#N/A	0.0332145	1
BCHE	854026	BCHE	C/C=C/1\[C@H]2C=C(C[C@]1(N)c1c(C2)[nH]c(=O)cc1)C	ATCMD9659	ZRJBHWIHUMBLCN-YQEJDHNASA-N	DB01928	experimental	0.0331352	1
MAPT	3013841	MAPT	COc1cc(C[C@H]2COC(=O)[C@@H]2Cc2cc(OC)c3c(c2)OCO3)cc(c1O)OC	ATCMD9922	LSSNBHGWOAHIQS-LSDHHAIUSA-N	#N/A	#N/A	0.0115766	1
MAPT	3584988	MAPT	COc1ccc(cc1)C(C(=O)c1ccc(cc1O)O)C	UNPD174719	CCOJFDRSZSSKOG-UHFFFAOYSA-N	#N/A	#N/A	0.0116788	1
MAPT	5281406	MAPT	COc1cc2cc(Oc3ccc4c(c3)oc(=O)cc4)c(=O)oc2cc1O	UNPD148007	JRHMMVBOTXEHGJ-UHFFFAOYSA-N	#N/A	#N/A	0.011786	1
ABCC1	5281699	ABCC1	COc1ccc(cc1O)c1oc2cc(O)cc(c2c(=O)c1O)O	UNPD84193	FPLMIPQZHHQWHN-UHFFFAOYSA-N	#N/A	#N/A	0.0123224	1
ABCG2	5281946	ABCG2	COc1c(oc2c(c1=O)c(O)cc(c2)O)c1ccccc1	UNPD28773	LYISDADPVOHJBJ-UHFFFAOYSA-N	#N/A	#N/A	0.0144622	1
ABCG2	5281949	ABCG2	COc1ccc(cc1)c1oc2c(c(=O)c1O)c(O)cc(c2C(C=C)(C)C)O	UNPD150217	ZETKATWNOCCPNF-UHFFFAOYSA-N	#N/A	#N/A	0.0143486	1
ABCG2	5281950	ABCG2	C=CC(c1c(O)cc(c2c1oc(c1ccccc1)c(c2=O)O)O)(C)C	UNPD47619	VEXSVXVQCSMKRX-UHFFFAOYSA-N	#N/A	#N/A	0.0141851	1
MAPT	5293655	MAPT	Oc1cc(O)c2c(c1)oc(c(c2=O)OC1OC(COC2OC(C)C(C(C2O)O)O)C(C(C1O)O)O)c1ccc(c(c1)O)O	UNPD106784	IKGXIBQEEMLURG-UHFFFAOYSA-N	#N/A	#N/A	0.0115724	1
MAPT	5318569	MAPT	COc1ccc(cc1)c1cc(=O)c2c(o1)c(c(cc2O)O)c1cc(ccc1OC)c1cc(=O)c2c(o1)cc(cc2O)O	UNPD22500	HUOOMAOYXQFIDQ-UHFFFAOYSA-N	#N/A	#N/A	0.0118189	1
BCHE	5319470	BCHE	COc1ccc2c(c1)c1cc[n+](cc1[nH]2)C	UNPD65061	UXIBWQLCPYHBSH-UHFFFAOYSA-O	#N/A	#N/A	0.0335714	1
ABCC1	5319487	ABCC1	COc1cccc2c1nc1c3[nH]c4c(c3CCn1c2=O)cccc4	UNPD58612	HUQHSJJIKVPMHA-UHFFFAOYSA-N	#N/A	#N/A	0.0122471	1
MAPT	5320686	MAPT	O=C(OC[C@H]1O[C@@H](Oc2c(oc3c(c2=O)c(O)cc(c3)O)c2ccc(cc2)O)[C@@H]([C@H]([C@@H]1O)O)O)/C=C/c1ccc(cc1)O	UNPD211240	DVGGLGXQSFURLP-VWMSDXGPSA-N	#N/A	#N/A	0.0115873	1
ABCC1	5354004	ABCC1	COc1ccc(c(c1)OC)/C=C/c1cc(OC)cc(c1)OC	UNPD88161	JDBCWSHYEQUBLW-AATRIKPKSA-N	#N/A	#N/A	0.01229	1
MAPT	5375083	MAPT	CC1CCCC(=O)CCC/C=C/c2c(C(=O)O1)c(O)cc(c2)O	UNPD192198	MBMQEIFVQACCCH-XVNBXDOJSA-N	#N/A	#N/A	0.0115651	1
MAPT	5376979	MAPT	Oc1ccc(c(c1)O)C(=O)/C=C/c1ccccc1	UNPD106120	JUMSUVHHUVPSOY-RMKNXTFCSA-N	#N/A	#N/A	0.011803	1
BCHE	5462442	BCHE	CC1=C[C@H]2Cc3c([C@@]4(C1)[C@@H]2CCCN4)ccc(=O)[nH]3	TCMID3942	YYWGABLTRMRUIT-HWWQOWPSSA-N	#N/A	#N/A	0.0331333	1
ABCG2	5481248	ABCG2	COc1c(OC)cc(cc1OC)c1oc2cc(O)cc(c2c(=O)c1O)O	UNPD89137	LHNLHJJGLDWGFS-UHFFFAOYSA-N	#N/A	#N/A	0.0143799	1
BCHE	5488283	BCHE	OC[C@H]1OC(Oc2c(oc3c(c2=O)c(O)cc(c3)O)c2ccc(cc2)O)[C@@H]([C@H]([C@H]1O)O)O	TCMID7598	JPUKWEQWGBDDQB-HBDJNLTOSA-N	#N/A	#N/A	0.0330823	1
NFKB1	5495926	NFKB1	COc1c(O)cc2c(c1CCC(O)(C)C)c(=O)c1c(o2)cc(c(c1O)CC=C(C)C)O	UNPD87279	TYALNCRUIKOKGP-UHFFFAOYSA-N	#N/A	#N/A	0.0241734	1
MAPT	5711223	MAPT	COc1ccc(cc1)/C=C/C(=O)c1ccc(cc1O)O	UNPD22418	ADRQFDIWPRFKSP-RUDMXATFSA-N	#N/A	#N/A	0.0118075	1
BCHE	5912039	BCHE	C/C=C/1\C2C=C(CC1(N)c1c(C2)[nH]c(=O)cc1)C	UNPD8995	ZRJBHWIHUMBLCN-QDEBKDIKSA-N	DB04864	investigational	0.0331352	1
BCHE	6420076	BCHE	C1CCC2=Nc3c(CN2C1)cccc3	UNPD179318	PZRHMLTUOQZGFU-UHFFFAOYSA-N	#N/A	#N/A	0.0333199	1
MAPT	6440498	MAPT	C/C(=C\COc1c2ccoc2cc2c1ccc(=O)o2)/CCC(C(O)(C)C)O	UNPD148044	IXZUPBUEKFXTSD-MDWZMJQESA-N	#N/A	#N/A	0.0115823	1
ABCC1	9818893	ABCC1	COc1cc(/C=C/c2cc(OC)c(c(c2)OC)OC)cc(c1)OC	UNPD16829	PYSIIZCKWCWZPP-VOTSOKGWSA-N	#N/A	#N/A	0.0123141	1
BCHE	9838394	BCHE	COc1ccc2c3c1O[C@@H]1[C@@]3(CCNC2)C=C[C@@H](C1)O	TCMID548	AIXQQSTVOSFSMO-RBOXIYTFSA-N	#N/A	#N/A	0.0331375	1
MAPT	10175330	MAPT	O=C(OC[C@H]1O[C@@H](Oc2c(oc3c(c2=O)c(O)cc(c3)O)c2ccc(cc2)O)[C@@H]([C@H]([C@@H]1O)O)O)/C=C\c1ccc(cc1)O	TCMID7653	DVGGLGXQSFURLP-PYFXTMFGSA-N	#N/A	#N/A	0.0115873	1
MAPT	11259008	MAPT	COc1cc(C[C@H]2[C@@H](O)OC[C@@H]2Cc2cc(OC)c3c(c2)OCO3)cc(c1OC)OC	ATCMD13854	ADGULOHTKSMBCP-PXAQALGRSA-N	#N/A	#N/A	0.0116496	1
ABCG2	11536318	ABCG2	Oc1cc2oc(cc(=O)c2c(c1C)O)c1ccccc1	UNPD3236	XRJWLVUOUWIPHW-UHFFFAOYSA-N	#N/A	#N/A	0.0144735	1
MAPT	12082365	MAPT	C/C(=C\COc1c2ccoc2cc2c1ccc(=O)o2)/CC[C@H](C(O)(C)C)O	UNPD226751	IXZUPBUEKFXTSD-INMULRNOSA-N	#N/A	#N/A	0.0115823	1
MAPT	44575384	MAPT	CO[C@@H]1OC[C@@H]([C@H]1Cc1ccc2c(c1)OCO2)Cc1ccc2c(c1)OCO2	ATCMD14219	UUUXPUGZNDRYSV-GCKMJXCFSA-N	#N/A	#N/A	0.0117169	1
MAPT	44575400	MAPT	CCOc1cc(C[C@H]2COC([C@@H]2Cc2cc(OC)c(c(c2)OC)OC)O)cc2c1OCO2	TCMID1645	PPKABVGOUVBEEX-HSQXHLSASA-N	#N/A	#N/A	0.0116513	1
BCHE	46211767	BCHE	C/C(=C\Cc1cc(c(cc1O)O)c1cc(=O)c2c(o1)cc(cc2O)O)/CCC=C(C)C	UNPD201632	CGAAHNXTXSLXAJ-VIZOYTHASA-N	#N/A	#N/A	0.0332605	1
MAPT	54582680	MAPT	C/C(=C\COc1c2ccoc2cc2c1ccc(=O)o2)/CCC(C(O)(C)C)OC(C(CC/C(=C/COc1c2ccoc2cc2c1ccc(=O)o2)/C)O)(C)C	UNPD76125	AGWWNHLHAZTYCS-RYQLWAFASA-N	#N/A	#N/A	0.0115773	1
MAPT	54584618	MAPT	C/C(=C\COc1c2ccoc2cc2c1ccc(=O)o2)/CCC(C(=C)C)OC(C(CC/C(=C/COc1c2ccoc2cc2c1ccc(=O)o2)/C)O)(C)C	UNPD67922	ZXUKAZPCOMPMHC-JQMRRPHZSA-N	#N/A	#N/A	0.0115867	1
BCHE	56598866	BCHE	CCCCC/C=C\C/C=C\CCCCCCCC(=O)OCCCc1cc(OC)c2c(c1)cc(o2)c1ccc2c(c1)OCO2	UNPD204089	NHCDDUNWYVJRPS-NQLNTKRDSA-N	#N/A	#N/A	0.03304	1
BCHE	56600472	BCHE	CCCCC/C=C\C/C=C\CCCCCCCC(=O)OCCCc1ccc2c(c1)cc(o2)c1ccc2c(c1)OCO2	UNPD204088	AABHSZUTAUSICN-HZJYTTRNSA-N	#N/A	#N/A	0.0330382	1
BCHE	56600473	BCHE	CCCCCCCC/C=C\CCCCCCCC(=O)OCCCc1ccc2c(c1)cc(o2)c1ccc2c(c1)OCO2	UNPD204087	GIGIGVBVJACSBJ-KTKRTIGZSA-N	#N/A	#N/A	0.033036	1
BCHE	56659293	BCHE	CCCCCCCC/C=C\CCCCCCCC(=O)OCCCc1cc(OC)c2c(c1)cc(o2)c1ccc2c(c1)OCO2	UNPD198905	GVZWPCDBHBSBHJ-KHPPLWFESA-N	#N/A	#N/A	0.0330378	1
BCHE	1188	BCHE	O=c1[nH]c(=O)c2c([nH]1)nc[nH]2	UNPD4350	LRFVTYWOQMYALW-UHFFFAOYSA-N	DB02134	experimental	0.0165648	1
LMNA	6228	LMNA	O=CN(C)C	UNPD183246	ZMXDDKWLCZADIW-UHFFFAOYSA-N	DB01844	experimental	0.0105654	1
LMNA	7498	LMNA	BrCc1ccccc1	TCMSP3092	AGEZXYOZHKGVCM-UHFFFAOYSA-N	#N/A	#N/A	0.0104998	1
SLC5A2	10211	SLC5A2	COc1c2ccoc2c(c2c1ccc(=O)o2)OC[C@H](C(O)(C)C)O	ATCMD2828	PKRPFNXROFUNDE-LLVKDONJSA-N	#N/A	#N/A	0.0174131	1
LMNA	10722	LMNA	O=Cc1ccccc1C	UNPD7126	BTFQKIATRPGRBS-UHFFFAOYSA-N	#N/A	#N/A	0.010543	1
SLC5A2	65056	SLC5A2	Oc1cc(O)c2c(c1)O[C@H]([C@H](C2)OC(=O)c1cc(O)c(c(c1)O)O)c1ccc(c(c1)O)O	TCMSP4660	LSHVYAFMTMFKBA-FPOVZHCZSA-N	#N/A	#N/A	0.0174383	1
TNFRSF1A	97696	TNFRSF1A	COc1cc(OC)cc2c1c(=O)c1c([nH]2)cccc1	UNPD52760	BILBOTFLFDBNNB-UHFFFAOYSA-N	#N/A	#N/A	0.0143426	1
SLC5A2	130976	SLC5A2	Oc1cc(O)cc(c1)Oc1c(O)cc(c2c1Oc1c(O)cc3c(c1O2)c1c(O)cc(c(c1o3)Oc1cc(O)cc(c1)O)O)O	UNPD61901	SLWPBUMYPRVYIJ-UHFFFAOYSA-N	#N/A	#N/A	0.0174288	1
LMNA	237332	LMNA	OCc1ccc(o1)C=O	UNPD172457	NOEGNKMFWQHSLB-UHFFFAOYSA-N	#N/A	#N/A	0.0107713	1
TNFRSF1A	369599	TNFRSF1A	COc1cc2oc(cc(=O)c2c(c1C)O)c1ccccc1	UNPD115755	QXJMWAGIFVRLTO-UHFFFAOYSA-N	#N/A	#N/A	0.00719366	1
SLC5A2	2824823	SLC5A2	Oc1cc(O)c2c(c1)O[C@H]([C@H](C2)OC(=O)c1cc(O)c(c(c1)O)O)c1cc(O)c(c(c1)O)O	TCMSP4991	WMBWREPUVVBILR-RXVVDRJESA-N	#N/A	#N/A	0.0174357	1
SLC5A2	3008868	SLC5A2	Oc1cc(O)cc(c1)Oc1c(O)cc(c2c1Oc1c(O)cc(cc1O2)Oc1c(O)cc(cc1O)Oc1c(O)cc(c2c1Oc1c(O)cc(cc1O2)O)O)O	UNPD144970	DRZQFGYIIYNNEC-UHFFFAOYSA-N	#N/A	#N/A	0.0174391	1
MAOA	5271544	MAOA	COc1ccc(cc1)C1CC(=O)c2c(O1)cc(cc2)OC	UNPD108572	YAEYGSBLDUIDTP-UHFFFAOYSA-N	#N/A	#N/A	0.0142371	1
SLC5A2	5276890	SLC5A2	Oc1cc(O)c2c(c1)O[C@@H]([C@H](C2)OC(=O)c1cc(O)c(c(c1)O)O)c1cc(O)c(c(c1)O)O	TCMTW21333	WMBWREPUVVBILR-GHTZIAJQSA-N	#N/A	#N/A	0.0174357	1
BCR	5281666	BCR	COc1ccc(cc1)c1oc2cc(O)cc(c2c(=O)c1O)O	UNPD95813	SQFSKOYWJBQGKQ-UHFFFAOYSA-N	#N/A	#N/A	0.00998012	1
TRPA1	5284648	TRPA1	Oc1ccc2c(c1)occ(c2=O)c1ccc(c(c1)O)O	UNPD30644	DDKGKOOLFLYZDL-UHFFFAOYSA-N	#N/A	#N/A	0.0850856	1
PDE5	5318997	PDE5	COc1ccc(cc1)c1oc2c(CC=C(C)C)c(O[C@@H]3O[C@H](CO)[C@H]([C@@H]([C@H]3O)O)O)cc(c2c(=O)c1O[C@@H]1O[C@@H](C)[C@@H]([C@H]([C@H]1O)O)O)O	TCMTW18206	TZJALUIVHRYQQB-XLRXWWTNSA-N	#N/A	#N/A	0.158037	1
SLC5A2	6440422	SLC5A2	COc1c2occc2c(c2c1oc(=O)cc2)OC/C=C(/CCC=C(C)C)\C	UNPD68068	OQHQALGVQDTJDN-XNTDXEJSSA-N	#N/A	#N/A	0.0174197	1
SLC5A2	10425234	SLC5A2	Oc1cc2O[C@@H](c3cc(O)c(c(c3)O)O)[C@H](Cc2c(c1)O)O	TCMSP1952	XMOCLSLCDHWDHP-WFASDCNBSA-N	#N/A	#N/A	0.0174488	1
SLC5A2	10429214	SLC5A2	Oc1cc(O)c2c(c1)oc1c(o2)c2oc3cc(O)cc(c3oc2cc1O)O	UNPD99770	LBHQACSAGWCMAB-UHFFFAOYSA-N	#N/A	#N/A	0.0174495	1
SLC5A2	10480940	SLC5A2	Oc1cc(O)c(c(c1)O)Oc1cc(O)c2c(c1)Oc1c(O2)c(Oc2cc(O)cc(c2)O)c(cc1O)O	UNPD128222	JLEVVQRBEATTCM-UHFFFAOYSA-N	#N/A	#N/A	0.0174351	1
SLC5A2	11013288	SLC5A2	COc1cc2oc3C(O)Oc4c(c3c(=O)c2c(c1C)O)ccc(c4)O	UNPD43785	SUWMBRRWYKHHDH-UHFFFAOYSA-N	#N/A	#N/A	0.0174658	1
TNF	11146840	TNF	OC[C@H]1O[C@@H](O[C@@H]2OC=C([C@H](/C/2=C/C)CC(=O)OC[C@H]2O[C@@H](OCCc3ccc(cc3)O)[C@@H]([C@H]([C@@H]2O)O)O)C(=O)OC)[C@@H]([C@H]([C@@H]1O)O)O	UNPD226687	STKUCSFEBXPTAY-GSUVRYNNSA-N	#N/A	#N/A	0.0414422	1
SLC5A2	15081178	SLC5A2	COC1Oc2cc(O)ccc2c2c1oc1cc(O)c(c(c1c2=O)O)C	UNPD176947	ZESAOJOQKPXOPG-UHFFFAOYSA-N	#N/A	#N/A	0.0174642	1
PFKFB3	44178672	PFKFB3	COc1cc2cc(c(=O)oc2c(c1O)OC)c1cc2cc(O)c(cc2oc1=O)O	UNPD33071	XFGGVXYNIBUVBK-UHFFFAOYSA-N	#N/A	#N/A	0.0470137	1
SLC5A2	44258296	SLC5A2	CC(=CCc1c(oc2c(c1=O)c(O)cc(c2)O)c1ccc(c2c1OC(C)(C)C=C2)O)C	UNPD63887	DBUNRZUFILGKHP-UHFFFAOYSA-N	#N/A	#N/A	0.0174786	1
SLC5A2	44563121	SLC5A2	CC(=CC[C@@H](C(=C)C)Cc1c(O)cc(c2c1O[C@@H](CC2=O)c1ccccc1O)O)C	ATCMD12313	OGBMVWVBHWHRGD-MWTRTKDXSA-N	#N/A	#N/A	0.0175548	1
SLC5A2	44593449	SLC5A2	COc1cc(O)ccc1[C@@H]1CC(=O)c2c(O1)c(C[C@H](C(=C)C)CC=C(C)C)c(cc2O)O	TCMTW20955	YLTPWCZXKJSORQ-GYCJOSAFSA-N	#N/A	#N/A	0.0175712	1
LMNA	244	LMNA	OCc1ccccc1	UNPD138820	WVDDGKGOMKODPV-UHFFFAOYSA-N	DB06770	approved	0.0107472	1
LMNA	247	LMNA	[O-]C(=O)C[N+](C)(C)C	UNPD173950	KWIUHFFTVRNATP-UHFFFAOYSA-N	DB06756	approved; nutraceutical	0.0105839	1
LMNA	702	LMNA	CCO	UNPD1673	LFQSCWFLJHTTHZ-UHFFFAOYSA-N	DB00898	approved	0.0107354	1
LMNA	978	LMNA	OC(=O)c1ccc(cc1)N	UNPD178955	ALYNCZNDIQEVRV-UHFFFAOYSA-N	DB02362	experimental	0.0108604	1
BCHE	1140	BCHE	Cc1ccccc1	UNPD42585	YXFVVABEGXRONW-UHFFFAOYSA-N	DB11558	vet_approved	0.0167808	1
LMNA	3893	LMNA	CCCCCCCCCCCC(=O)O	UNPD141768	POULHZVOKOAJMA-UHFFFAOYSA-N	#N/A	#N/A	0.010667	1
LMNA	5787	LMNA	Clc1ccc(c(c1)Cl)C(=O)O	UNPD107226	ATCRIUVQKHMXSH-UHFFFAOYSA-N	#N/A	#N/A	0.0104792	1
LMNA	5801	LMNA	Nc1ccccc1O	UNPD112881	CDAWCLOXVUBKRW-UHFFFAOYSA-N	DB01726	experimental	0.0106002	1
LMNA	6115	LMNA	Nc1ccccc1	UNPD186500	PAYRUJLWNCNPSJ-UHFFFAOYSA-N	DB06728	experimental	0.0109352	1
LMNA	6560	LMNA	OCC(C)C	UNPD27247	ZXEKIIBDNHEJCQ-UHFFFAOYSA-N	#N/A	#N/A	0.0107418	1
LMNA	6568	LMNA	CCC(O)C	UNPD11649	BTANRVKWQNVYAZ-UHFFFAOYSA-N	#N/A	#N/A	0.0106883	1
LMNA	6589	LMNA	CC(C(C)C)C	UNPD153974	ZFFMLCVRJBZUDZ-UHFFFAOYSA-N	#N/A	#N/A	0.0107437	1
LMNA	6654	LMNA	CC1=CCC2CC1C2(C)C	UNPD173180	GRWFGVWFFZKLTI-UHFFFAOYSA-N	#N/A	#N/A	0.0105517	1
LMNA	7220	LMNA	c1ccc2c(c1)n[nH]n2	TCMSP1624	QRUDEWIWKLJBPS-UHFFFAOYSA-N	#N/A	#N/A	0.0103659	1
LMNA	7335	LMNA	CC(=O)OC1CC(CC=C1C)C(=C)C	UNPD108915	YTHRBOFHFYZBRJ-UHFFFAOYSA-N	#N/A	#N/A	0.0105987	1
LMNA	7501	LMNA	C=Cc1ccccc1	UNPD31749	PPBRXRYQALVLMV-UHFFFAOYSA-N	#N/A	#N/A	0.0106826	1
LMNA	7515	LMNA	CNc1ccccc1	UNPD141475	AFBPFSWMIHJQDM-UHFFFAOYSA-N	#N/A	#N/A	0.0106268	1
LMNA	7517	LMNA	ON=C1CCCCC1	UNPD51693	VEZUQRBDRNJBJY-UHFFFAOYSA-N	#N/A	#N/A	0.010561	1
LMNA	7681	LMNA	CN(Cc1ccccc1)C	TCMSP4044	XXBDWLFCJWSEKW-UHFFFAOYSA-N	#N/A	#N/A	0.0106102	1
LMNA	7820	LMNA	COC(=O)CCC(=O)OC	UNPD91800	MUXOBHXGJLMRAB-UHFFFAOYSA-N	#N/A	#N/A	0.010599	1
LMNA	7915	LMNA	CC(OC(=O)C)C	UNPD35687	JMMWKPVZQRWMSS-UHFFFAOYSA-N	#N/A	#N/A	0.0107492	1
LMNA	7922	LMNA	O=C1CCC(=O)O1	TCMSP6339	RINCXYDBBGOEEQ-UHFFFAOYSA-N	#N/A	#N/A	0.0105917	1
LMNA	7933	LMNA	Oc1cccc(c1)Cl	TCMSP4295	HORNXRXVQWOLPJ-UHFFFAOYSA-N	DB01957	experimental	0.0107051	1
LMNA	8004	LMNA	CCCC=C	UNPD59148	YWAKXRMUMFPDSH-UHFFFAOYSA-N	#N/A	#N/A	0.0106411	1
LMNA	8103	LMNA	CCCCCCO	UNPD7758	ZSIAUFGUXNUGDI-UHFFFAOYSA-N	#N/A	#N/A	0.0108608	1
LMNA	8125	LMNA	CCCCCCC=C	UNPD165398	KWKAKUADMBZCLK-UHFFFAOYSA-N	#N/A	#N/A	0.010621	1
LMNA	8130	LMNA	CCCCCCC=O	UNPD115595	FXHGMKSSBGDXIY-UHFFFAOYSA-N	#N/A	#N/A	0.0106237	1
LMNA	8133	LMNA	CCCCOCCO	TCMSP8380	POAOYUHQDCAZBD-UHFFFAOYSA-N	#N/A	#N/A	0.0107938	1
LMNA	8141	LMNA	CCCCCCCCC	UNPD68235	BKIMMITUMNQMOS-UHFFFAOYSA-N	#N/A	#N/A	0.0106441	1
LMNA	8344	LMNA	COCCOC(=O)c1ccccc1C(=O)OCCOC	TCMSP8802	HSUIVCLOAAJSRE-UHFFFAOYSA-N	#N/A	#N/A	0.010598	1
LMNA	8419	LMNA	COc1cc(C=O)ccc1OC	UNPD118415	WJUFSDZVCOTFON-UHFFFAOYSA-N	#N/A	#N/A	0.010493	1
LMNA	8872	LMNA	CCCCCCOC(=O)C(=C)C	TCMSP7302	LNCPIMCVTKXXOY-UHFFFAOYSA-N	#N/A	#N/A	0.0105996	1
MAOA	10251	MAOA	O=C1CC(Oc2c1cccc2)c1ccccc1	UNPD12195	ZONYXWQDUYMKFB-UHFFFAOYSA-N	#N/A	#N/A	0.0143142	1
LMNA	12748	LMNA	Cc1cscn1	UNPD26600	QMHIMXFNBOYPND-UHFFFAOYSA-N	#N/A	#N/A	0.0104558	1
LMNA	13165	LMNA	OCCOC(=O)C=C	TCMSP4944	OMIGHNLMNHATMP-UHFFFAOYSA-N	#N/A	#N/A	0.0106561	1
TNKS2	15674	TNKS2	Cc1nc2ccccc2c(=O)[nH]1	UNPD156257	FIEYHAAMDAPVCH-UHFFFAOYSA-N	#N/A	#N/A	0.054863	1
LMNA	28803	LMNA	C=CC(=O)OCCOCCOCCOCCOC(=O)C=C	UNPD123217	HCLJOFJIQIJXHS-UHFFFAOYSA-N	#N/A	#N/A	0.0106359	1
LMNA	31241	LMNA	CCCCC(C=O)CC	UNPD161186	LGYNIFWIKSEESD-UHFFFAOYSA-N	#N/A	#N/A	0.0106271	1
TNKS2	64048	TNKS2	O=c1[nH]c2ccccc2c(=O)[nH]1	UNPD139615	SDQJTWBNWQABLE-UHFFFAOYSA-N	#N/A	#N/A	0.0548582	1
BACE1	68827	BACE1	O=C1OC2O[C@@]3(C)CC[C@@H]4[C@]2([C@H]([C@H]1C)CC[C@H]4C)OO3	TCMTW26227	BLUAFEHZUWYNDE-NNWCWBAJSA-N	#N/A	#N/A	0.0179429	1
SLC5A4	72936	SLC5A4	CC(=CC[C@@H](C(=C)C)Cc1c(O)cc(c2c1O[C@@H](CC2=O)c1ccc(cc1O)O)O)C	ATCMD20013	XRYVAQQLDYTHCL-CMJOXMDJSA-N	#N/A	#N/A	0.0387461	1
TNFRSF1A	73201	TNFRSF1A	COc1cc2O[C@@H](CC(=O)c2c(c1)O)c1ccccc1	ATCMD1402	ORJDDOBAOGKRJV-AWEZNQCLSA-N	#N/A	#N/A	0.0143275	1
LMNA	73917	LMNA	COC(=O)CCCC(=O)O	UNPD36658	IBMRTYCHDPMBFN-UHFFFAOYSA-N	#N/A	#N/A	0.010643	1
LMNA	77069	LMNA	CCOc1ccc(cc1OC)C(=O)O	UNPD184236	LBYKODYNFRCBIR-UHFFFAOYSA-N	#N/A	#N/A	0.0106004	1
LMNA	83887	LMNA	OC(=O)C[C@H](C(=O)O)N	TCMSP64	CKLJMWTZIZZHCS-UWTATZPHSA-N	DB02655	experimental	0.0107005	1
LMNA	95116	LMNA	OC(=O)CCSSCCC(=O)O	UNPD199016	YCLSOMLVSHPPFV-UHFFFAOYSA-N	#N/A	#N/A	0.0107121	1
LMNA	108770	LMNA	OC(=O)c1cc2cc3CCCN4c3c(c2oc1=O)CCC4	TCMSP8797	KCDCNGXPPGQERR-UHFFFAOYSA-N	#N/A	#N/A	0.000403513	1
TRPA1	123197	TRPA1	COc1ccc(cc1)CN=C=S	UNPD120790	IMFQYAJJXFXVMM-UHFFFAOYSA-N	#N/A	#N/A	0.0851755	1
MYLK	132015	MYLK	Oc1cc2cc3C(O)CCC(=O)c3c(c2c(c1)C)O	CNPD20497	LIETVYHJBSLSSW-UHFFFAOYSA-N	#N/A	#N/A	0.192758	1
MAPT	134551	MAPT	CC(C[C@H]1C(=O)N2CCC[C@H]2[C@]2(N1C(=O)[C@@](O2)(NC(=O)[C@H]1CN(C)[C@H]2C(=C1)c1cccc3c1c(C2)c[nH]3)C(C)C)O)C	ATCMD7218	YDOTUXAWKBPQJW-NSLWYYNWSA-N	#N/A	#N/A	0.00876172	1
ALDH2	147157	ALDH2	COc1ccc2c(c1)c(=O)cc(o2)c1ccccc1	UNPD47631	XZQLSABETMKIGG-UHFFFAOYSA-N	#N/A	#N/A	0.0263972	1
TNFRSF1A	150893	TNFRSF1A	COc1cc(ccc1OC)c1oc2c(OC)c(OC)c(c(c2c(=O)c1OC)OC)OC	UNPD120666	SSXJHQZOHUYEGD-UHFFFAOYSA-N	#N/A	#N/A	0.0143264	1
TNKS2	342403	TNKS2	Oc1cccc(c1)C(=O)N	UNPD27349	NGMMGKYJUWYIIG-UHFFFAOYSA-N	#N/A	#N/A	0.0553482	1
TNFRSF1A	369597	TNFRSF1A	COc1cc2OC(CC(=O)c2c(c1C)O)c1ccccc1	UNPD13057	MJPLGHSVCRZIQU-UHFFFAOYSA-N	#N/A	#N/A	0.0143243	1
SLC5A2	442679	SLC5A2	O=C(c1cc(O)c(c(c1)O)O)O[C@@H]1[C@@H](OC(=O)c2cc(O)c(c(c2)O)O)[C@@H](O[C@H]2[C@H]1OC(=O)c1cc(O)c(c(c1c1c(C(=O)OC2)cc(c(c1O)O)O)O)O)OC(=O)c1cc(O)c(c(c1)O)O	TCMTW19154	JCGHAEBIBSEQAD-UUUCSUBKSA-N	#N/A	#N/A	0.0174308	1
LMNA	444212	LMNA	OC(=O)C/C(=C\C(=O)O)/C(=O)O	UNPD111714	GTZCVFVGUGFEME-HNQUOIGGSA-N	#N/A	#N/A	0.0106169	1
TNKS2	466268	TNKS2	COc1ccc2c(c1)oc(cc2=O)c1ccccc1	UNPD88528	QKNDCRMJDZLFEG-UHFFFAOYSA-N	#N/A	#N/A	0.107982	1
TNFRSF1A	624831	TNFRSF1A	COc1ccc(cc1)c1oc2cc(OC)cc(c2c(=O)c1O)OC	UNPD93473	SGPXJCVFCJANKN-UHFFFAOYSA-N	#N/A	#N/A	0.0143843	1
TNFRSF1A	631171	TNFRSF1A	COc1ccc2c(c1)oc(c(c2=O)OC)c1ccc(c(c1)OC)OC	UNPD17753	NAMFTZBUZYVNST-UHFFFAOYSA-N	#N/A	#N/A	0.0143273	1
ACHE	667496	ACHE	O[C@H]1CCN2C1=Nc1ccccc1C2	TCMID6917	YIICVSCAKJMMDJ-JTQLQIEISA-N	#N/A	#N/A	0.0671008	1
LMNA	781057	LMNA	O=n1c2CCCCc2n(=O)c2c1CCCC2	UNPD147333	QPXGUOWHEWILET-UHFFFAOYSA-N	#N/A	#N/A	0.0106763	1
HSD17B10	854067	HSD17B10	CNC[C@@H](c1ccc(cc1)O)O	TCMID1315	YRCWQPVGYLYSOX-VIFPVBQESA-N	#N/A	#N/A	0.0137289	1
LMNA	1549103	LMNA	OC(=O)/C=C\c1c[nH]cn1	UNPD89821	LOIYMIARKYCTBW-UPHRSURJSA-N	#N/A	#N/A	0.0083235	1
MAOA	2825024	MAOA	COc1ccc2c(c1)OC(CC2=O)c1ccccc1	UNPD19157	VYESEQLQFXUROZ-UHFFFAOYSA-N	#N/A	#N/A	0.0142608	1
ACHE	3037884	ACHE	CO/C=C(\[C@H]1C[C@H]2N(C[C@@H]1CC)CCc1c2[nH]c2c1cccc2)/C(=O)OC	ATCMD9526	NMLUOJBSAYAYEM-AZQGJTAVSA-N	#N/A	#N/A	0.0668527	1
HRAS	3738100	HRAS	[O-]c1cc2CC[n+]3c2c(c1)c1cc2OCOc2cc1c3	UNPD34294	DFQOXFIPAAMFAU-UHFFFAOYSA-N	#N/A	#N/A	0.0212465	1
TNFRSF1A	5280682	TNFRSF1A	COc1cc(O)c2c(c1)oc(c(c2=O)OC)c1ccc(c(c1)O)OC	UNPD161153	KPCRYSMUMBNTCK-UHFFFAOYSA-N	#N/A	#N/A	0.0143079	1
GSTP1	5281612	GSTP1	COc1ccc(cc1O)c1cc(=O)c2c(o1)cc(cc2O)O	UNPD113143	MBNGWHIJMBWFHU-UHFFFAOYSA-N	#N/A	#N/A	0.0194063	1
CALM1	5281804	CALM1	COc1cc(O)c2c(c1)occ(c2=O)c1ccc(cc1)O	UNPD117013	KQMVAGISDHMXJJ-UHFFFAOYSA-N	#N/A	#N/A	0.023515	1
TNFRSF1A	5320462	TNFRSF1A	COc1c(oc2c(c1=O)c(O)c(c(c2)OC)OC)c1ccc(cc1)O	UNPD16360	YSXFFLGRZJWNFM-UHFFFAOYSA-N	#N/A	#N/A	0.0143252	1
TNFRSF1A	5352005	TNFRSF1A	COc1cc(O)c2c(c1)oc(c(c2=O)OC)c1ccc(c(c1)OC)OC	UNPD86819	HHGPYJLEJGNWJA-UHFFFAOYSA-N	#N/A	#N/A	0.0143059	1
CNR1	5353408	CNR1	CCCCC/C=C/C/C=C/C/C=C/C/C=C/CCCC(=O)NCCO	CNPD10481	LGEQQWMQCRIYKG-CGRWFSSPSA-N	#N/A	#N/A	0.107004	1
TNFRSF1A	5355469	TNFRSF1A	COc1ccc(cc1)/C=C/C(=O)c1c(O)cc(cc1OC)OC	UNPD190001	CGIBCVBDFUTMPT-RMKNXTFCSA-N	#N/A	#N/A	0.0144175	1
TNFRSF1A	5358893	TNFRSF1A	CCCc1cc(=O)c2c(o1)c1c(OC)cc(cc1cc2O)O	UNPD102942	POMCQPYWKLKBSX-UHFFFAOYSA-N	#N/A	#N/A	0.0143012	1
TNFRSF1A	5373259	TNFRSF1A	COc1cc(O)c(c(c1)OC)C(=O)/C=C/c1ccc(c(c1)OC)OC	UNPD157321	CEBBHGDAHZDJTP-FNORWQNLSA-N	#N/A	#N/A	0.0143589	1
LMNA	5375199	LMNA	OC(=O)/C=C(\C=C\C1(O)C(=CC(=O)CC1(C)C)C)/C	UNPD53445	JLIDBLDQVAYHNE-LXGGSRJLSA-N	#N/A	#N/A	0.0105682	1
TNFRSF1A	5712116	TNFRSF1A	COc1cc(/C=C/C(=O)c2ccccc2O)ccc1OC	UNPD228613	MFLSRHQHCDTOGH-VQHVLOKHSA-N	#N/A	#N/A	0.0143417	1
ABCB1	6063342	ABCB1	COc1ccc(cc1)/C=C/C(=O)c1ccc(cc1OC)OC	UNPD124670	HVAKUYCEWDPRCA-IZZDOVSWSA-N	#N/A	#N/A	0.00566652	1
LMNA	6438762	LMNA	O=CN1C=CC2=C(C1COC(=O)/C(=C\C)/C)C(=O)C(=C(C2=O)C)OC	UNPD173714	VRZJVUPPQWDFAC-YHYXMXQVSA-N	#N/A	#N/A	0.000398643	1
LMNA	6603766	LMNA	OC(=O)C(Oc1ccc(cc1)[C@@H]1CC1(Cl)Cl)(C)C	UNPD211915	KPSRODZRAIWAKH-JTQLQIEISA-N	#N/A	#N/A	0.0107147	1
LTB4R2	10021742	LTB4R2	Cn1c(N)nc(c1Cc1ccc2c(c1)OCO2)Cc1ccc2c(c1)OCO2	UNPD86261	CHUHMZZQHYOKBF-UHFFFAOYSA-N	#N/A	#N/A	0.088111	1
TNFRSF1A	10047854	TNFRSF1A	C/C(=C\Cc1c(O)cc2c(c1O)c(=O)c(c(o2)c1ccc(cc1)O)O)/CCC=C(C)C	UNPD73478	MBIJQAHZUBUPNM-VIZOYTHASA-N	#N/A	#N/A	0.0143103	1
TNFRSF1A	11537442	TNFRSF1A	COC1Oc2c(O)cccc2c2c1oc1cc(OC)cc(c1c2=O)O	UNPD15744	AEWYTSRFBZXCNI-UHFFFAOYSA-N	#N/A	#N/A	0.014306	1
TNFRSF1A	11751733	TNFRSF1A	CO/C(=C\c1ccc(cc1)O)/C(=O)N/C=C/c1cc(Br)c(c(c1)Br)O	UNPD18948	DIAAHMADUFVQJZ-OCSBKKPVSA-N	#N/A	#N/A	0.0142966	1
TNF	11827970	TNF	OC[C@H]1O[C@@H](O[C@H]2CC[C@]3(C(=CC[C@@H]4[C@@H]3CC[C@]3([C@H]4CC4[C@@H]3[C@H](C)[C@]3(O4)CC[C@H](CO3)C)C)C2)C)[C@@H]([C@H]([C@@H]1O)O)O	TCMTW29557	WXMARHKAXWRNDM-GAMIEDRGSA-N	#N/A	#N/A	0.0415362	1
HSD17B10	14539883	HSD17B10	Oc1cc(O)cc(c1)c1oc2c(c1)cc1c(c2)OC(C1)C(O)(C)C	UNPD175374	HMTMYIWMPJSCAZ-UHFFFAOYSA-N	#N/A	#N/A	0.0137139	1
HSD17B10	14539884	HSD17B10	Oc1cc(O)cc(c1)c1oc2c(c1)cc1c(c2)OC(C(C1)O)(C)C	UNPD138718	QFUCSEIKNTUPPA-UHFFFAOYSA-N	#N/A	#N/A	0.0137167	1
DAO	16126762	DAO	Oc1ccc(c(c1)O)CCc1cc(O)cc(c1)O	UNPD11507	IEOZKGCYMAJAHS-UHFFFAOYSA-N	#N/A	#N/A	0.0576513	1
TNFRSF1A	16745324	TNFRSF1A	COC1Oc2c(O)cccc2c2c1oc1cc(OC)c(c(c1c2=O)O)C	UNPD164888	KZXDJFLGVUVMJX-UHFFFAOYSA-N	#N/A	#N/A	0.0143041	1
NOD1	19910294	NOD1	Oc1cc(O)c(c(c1)O)C(=O)c1cc(O)cc(c1)O	UNPD159752	UQRUMZDBXRBEPM-UHFFFAOYSA-N	#N/A	#N/A	0.0494249	1
HSD17B10	42604718	HSD17B10	Oc1cc(O)cc(c1)c1oc2c(c1)cc1c(c2)O[C@H](C1)C(O)(C)C	TCMSP10538	HMTMYIWMPJSCAZ-GOSISDBHSA-N	#N/A	#N/A	0.0137139	1
TNFRSF1A	44136693	TNFRSF1A	CCCc1cc(=O)c2c(o1)c1c(OC)cc(cc1cc2OC)O	UNPD2919	QUPYOVWNMKVWDO-UHFFFAOYSA-N	#N/A	#N/A	0.0143006	1
TNFRSF1A	44257640	TNFRSF1A	COc1cc2oc(cc(=O)c2c(c1C)OC)c1ccccc1	UNPD207591	LDGCKWYSZUGWHS-UHFFFAOYSA-N	#N/A	#N/A	0.0143459	1
ACHE	44587246	ACHE	CN([C@H]1CC[C@]2([C@H](C1)CC[C@@H]1[C@@H]2CC[C@]2([C@H]1CC[C@@H]2C(N(C)C)C)C)C)C	ATCMD6974	IHGKQRLXUYWOQB-SYILLIHQSA-N	#N/A	#N/A	0.0668993	1
CNR2	68741582	CNR2	CC/C=C\C/C=C\C/C=C\CCCCCCCC(=O)NCc1ccccc1	UNPD218072	VCMMYRWIEZCYDK-PDBXOOCHSA-N	#N/A	#N/A	0.115965	1
CNR2	73353637	CNR2	CC/C=C\C/C=C\C/C=C\CCCCCCCC(=O)NCc1cccc(c1)OC	UNPD229919	XKHCEDYSKNATME-YSTUJMKBSA-N	#N/A	#N/A	0.115914	1
MAPT	13	MAPT	Clc1ccc(c(c1)Cl)Cl	UNPD118084	PBKONEOXTCPAFI-UHFFFAOYSA-N	#N/A	#N/A	0.0147994	1
TSHR	180	TSHR	CC(=O)C	UNPD133096	CSCPPACGZOOCGX-UHFFFAOYSA-N	#N/A	#N/A	0.00982494	1
TSHR	190	TSHR	Nc1ncnc2c1nc[nH]2	UNPD128555	GFFGJBXGBJISGV-UHFFFAOYSA-N	DB00173	approved; nutraceutical	0.0102582	1
RELA	199	RELA	NCCCCNC(=N)N	UNPD44169	QYPPJABKJHAVHS-UHFFFAOYSA-N	DB08838	experimental; investigational	0.0226811	1
TSHR	464	TSHR	O=C(c1ccccc1)NCC(=O)O	UNPD111463	QIAFMBKCNZACKA-UHFFFAOYSA-N	#N/A	#N/A	0.00973238	1
TSHR	594	TSHR	NC(C(=O)O)CS	UNPD58303	XUJNEKJLAYXESH-UHFFFAOYSA-N	#N/A	#N/A	0.00981389	1
MAPT	612	MAPT	OC(=O)C(O)C	UNPD169921	JVTAAEKCZFNVCJ-UHFFFAOYSA-N	DB04398	approved; vet_approved	0.015071	1
TSHR	636	TSHR	OCC1OC(CC1O)n1cnc2c1ncnc2N	UNPD148912	OLXZPDWKRNYJJZ-UHFFFAOYSA-N	#N/A	#N/A	0.00972437	1
TSHR	727	TSHR	ClC1C(Cl)C(Cl)C(C(C1Cl)Cl)Cl	UNPD123964	JLYXXMFPNIAWKQ-UHFFFAOYSA-N	#N/A	#N/A	0.00995303	1
TSHR	753	TSHR	OCC(CO)O	UNPD136665	PEDCQBHIVMGVHV-UHFFFAOYSA-N	DB04077	experimental	0.00971702	1
KDM4E	804	KDM4E	OCC1OC(C(C1O)O)n1cnc2c1ncnc2O	UNPD136286	UGQMRVRMYYASKQ-UHFFFAOYSA-N	#N/A	#N/A	0.0198884	1
TSHR	967	TSHR	O=c1[nH]c(=O)[nH]c(c1)C(=O)O	UNPD125358	PXQPEWDEAKTCGB-UHFFFAOYSA-N	DB02262	experimental	0.00975373	1
P2RY11	1051	P2RY11	O=Cc1c(COP(=O)(O)O)cnc(c1O)C	UNPD167718	NGVDGCNFYWLIFO-UHFFFAOYSA-N	DB00114	nutraceutical	0.0556369	1
TSHR	1052	TSHR	NCc1c(CO)cnc(c1O)C	UNPD92150	NHZMQXZHNVQTQA-UHFFFAOYSA-N	#N/A	#N/A	0.00982173	1
P2RX1	1054	P2RX1	OCc1c(CO)cnc(c1O)C	UNPD53280	LXNHXLLTXMVWPM-UHFFFAOYSA-N	DB00165	approved; nutraceutical; vet_approved	0.00187598	1
KDM4E	1134	KDM4E	OCC1OC(CC1O)n1cc(C)c(=O)[nH]c1=O	UNPD107017	IQFYYKKMVGJFEH-UHFFFAOYSA-N	#N/A	#N/A	0.0199403	1
TSHR	1256	TSHR	CC(=C)C1CCC(=CC1)C(=O)O	UNPD50198	CDSMSBUVCWHORP-UHFFFAOYSA-N	#N/A	#N/A	0.00974408	1
TSHR	1292	TSHR	OC(c1ccccc1)C(=O)O	UNPD114172	IWYDHOAUDWTVEP-UHFFFAOYSA-N	#N/A	#N/A	0.00975622	1
RELA	1748	RELA	NCCc1ccc(c(c1)O)OC	UNPD156014	WJXQFVMTIGJBFX-UHFFFAOYSA-N	#N/A	#N/A	0.0114036	1
TSHR	2337	TSHR	CCOC(=O)c1ccc(cc1)N	UNPD173084	BLFLLBZGZJTVJG-UHFFFAOYSA-N	DB01086	approved	0.00999861	1
MAPT	2355	MAPT	COc1c2ccc(=O)oc2cc2c1cco2	UNPD12397	BGEBZHIAGXMEMV-UHFFFAOYSA-N	#N/A	#N/A	0.00786056	1
MAPT	2363	MAPT	COc1cc(cc(c1OC)OC)C1C2C(=O)OCC2Cc2c1cc1OCOc1c2O	UNPD107647	HLBPOYVRLSXWJJ-UHFFFAOYSA-N	#N/A	#N/A	0.00862083	1
TSHR	2682	TSHR	CCCCCCCCCCCCCCCCO	UNPD44098	BXWNKGSJHAJOGX-UHFFFAOYSA-N	#N/A	#N/A	0.0101985	1
TRPA1	2764	TRPA1	Fc1cc2c(cc1N1CCNCC1)n(cc(c2=O)C(=O)O)C1CC1	UNPD146267	MYSWGUAQZAJSOK-UHFFFAOYSA-N	DB00537	approved; investigational	0.00923685	1
LMNA	3255	LMNA	CCC1OC(=O)C(C)C(OC2OC(C)C(C(C2)(C)OC)O)C(C)C(OC2OC(C)CC(C2O)N(C)C)C(CC(C(=O)C(C(C1(C)O)O)C)C)(C)O	UNPD114352	ULGZDMOVFRHVEP-UHFFFAOYSA-N	#N/A	#N/A	0.00036352	1
CNR1	3473	CNR1	CCCCCC(CC(=O)CCc1ccc(c(c1)OC)O)O	UNPD73001	NLDDIKRKFXEWBK-UHFFFAOYSA-N	#N/A	#N/A	0.0306501	1
TSHR	3776	TSHR	CC(O)C	UNPD133190	KFZMGEQAYNKOFK-UHFFFAOYSA-N	DB02325	approved	0.00989294	1
TSHR	4091	TSHR	CN(C(=N)NC(=N)N)C	UNPD213648	XZWYZXLIPXDOLR-UHFFFAOYSA-N	DB00331	approved	0.00978042	1
TP53	4277	TP53	O=C(NC1CCCCC1)NC1CCCCC1	UNPD39445	ADFXKUOMJKEIND-UHFFFAOYSA-N	#N/A	#N/A	0.0151159	1
RELA	4671	RELA	CCCCCCCCCCCCCCCC(=O)NCCO	UNPD113502	HXYVTAGFYLMHSO-UHFFFAOYSA-N	#N/A	#N/A	0.0227019	1
TSHR	4770	TSHR	NC(=O)OCCCc1ccccc1	UNPD57869	CAMYKONBWHRPDD-UHFFFAOYSA-N	#N/A	#N/A	0.00986659	1
MAPT	5052	MAPT	COc1ccc2c(c1)[nH]c1c2CCN2C1CC1C(C2)CC(C(C1C(=O)OC)OC)OC(=O)c1cc(OC)c(c(c1)OC)OC	UNPD120699	QEVHRUUCFGRFIF-UHFFFAOYSA-N	#N/A	#N/A	0.0125807	1
TP53	5144	TP53	C=CCc1ccc2c(c1)OCO2	UNPD81370	ZMQAAUBTXCXRIC-UHFFFAOYSA-N	#N/A	#N/A	0.00848671	1
TRPA1	5350	TRPA1	S=C=NCCCCS(=O)C	UNPD177251	SUVMJBTUFCVSAD-UHFFFAOYSA-N	#N/A	#N/A	0.0856165	1
TP53	5410	TP53	CCC(=O)OC1CCC2C1(C)CCC1C2CCC2=CC(=O)CCC12C	UNPD75165	PDMMFKSKQVNJMI-UHFFFAOYSA-N	#N/A	#N/A	0.00825424	1
MAPT	5541	MAPT	CC(=O)OC(COC(=O)C)COC(=O)C	UNPD61246	URAYPUMNDPQOKB-UHFFFAOYSA-N	#N/A	#N/A	0.0151027	1
TSHR	5634	TSHR	C=CCCCCCCCCC(=O)O	UNPD113997	FRPZMMHWLSIFAZ-UHFFFAOYSA-N	#N/A	#N/A	0.00995232	1
LMNA	5789	LMNA	OC[C@H]1O[C@H](C[C@@H]1O)n1cc(C)c(=O)[nH]c1=O	ATCMD21285	IQFYYKKMVGJFEH-XLPZGREQSA-N	#N/A	#N/A	0.000470584	1
TSHR	6503	TSHR	OCC(CO)(CO)N	TCMID10948	LENZDBCJOHFCAS-UHFFFAOYSA-N	DB03754	approved	0.00977308	1
MAPT	6557	MAPT	C=CC(=C)C	UNPD60291	RRHGJUQNOFWUDK-UHFFFAOYSA-N	#N/A	#N/A	0.0152371	1
TSHR	6597	TSHR	ClC(C(=O)O)Cl	UNPD18000	JXTHNDFMNIQAHM-UHFFFAOYSA-N	DB08809	experimental	0.00992655	1
MAPT	6716	MAPT	COc1c2c(=O)cc(oc2cc2c1cco2)C	UNPD15447	NZVQLVGOZRELTG-UHFFFAOYSA-N	#N/A	#N/A	0.0111005	1
DRD2	7046	DRD2	N1CCc2c(C1)cccc2	UNPD222295	UWYZHKAOTLEWKK-UHFFFAOYSA-N	#N/A	#N/A	0.000510327	1
TSHR	7147	TSHR	CCC(c1ccccc1)O	UNPD99558	DYUQAZSOFZSPHD-UHFFFAOYSA-N	#N/A	#N/A	0.00984808	1
TSHR	7187	TSHR	O=C(c1ccccc1)OOC(=O)c1ccccc1	TCMID7439	OMPJBNCRMGITSC-UHFFFAOYSA-N	DB09096	approved	0.00995557	1
TSHR	7191	TSHR	O=C(c1cccnc1)OCc1ccccc1	UNPD47863	KVYGGMBOZFWZBQ-UHFFFAOYSA-N	#N/A	#N/A	0.00984278	1
TSHR	7393	TSHR	CC(c1ccc(cc1)O)(C)C	TCMSP9685	QHPQWRBYOIRBIT-UHFFFAOYSA-N	#N/A	#N/A	0.00961976	1
TSHR	7405	TSHR	O=C1CC[C@H](N1)C(=O)O	TCMTW21722	ODHCTXKNWHHXJC-VKHMYHEASA-N	#N/A	#N/A	0.00961183	1
MAPT	7500	MAPT	CCc1ccccc1	UNPD186107	YNQLUTRBYVCPMQ-UHFFFAOYSA-N	#N/A	#N/A	0.0151618	1
LMNA	7583	LMNA	c1ccc(cc1)Oc1ccccc1	UNPD9248	USIUVYZYUHIAEV-UHFFFAOYSA-N	#N/A	#N/A	0.00557249	1
TSHR	7765	TSHR	CCOC(OCC)C	UNPD137635	DHKHKXVYLBGOIT-UHFFFAOYSA-N	#N/A	#N/A	0.00987019	1
MAPT	7771	MAPT	Cc1ccc(c(c1)C)O	UNPD35945	KUFFULVDNCHOFZ-UHFFFAOYSA-N	#N/A	#N/A	0.0151747	1
MIF	7847	MIF	C=CC=O	UNPD77865	HGINCPLSRVDWNT-UHFFFAOYSA-N	#N/A	#N/A	0.0296399	1
MAPT	8021	MAPT	CCNCC	TCMSP7453	HPNMFZURTQLUMO-UHFFFAOYSA-N	#N/A	#N/A	0.0149807	1
TSHR	8042	TSHR	CCCCCCCCCCCCCC(=O)OC(C)C	TCMSP9020	AXISYYRBXTVTFY-UHFFFAOYSA-N	#N/A	#N/A	0.00999548	1
TSHR	8138	TSHR	C=CCCCCCCCCC(=O)OC	UNPD18340	KISVAASFGZJBCY-UHFFFAOYSA-N	#N/A	#N/A	0.00994438	1
TSHR	8221	TSHR	CCCCCCCCCCCCCCCCCCO	UNPD62856	GLDOVTGHNKAZLK-UHFFFAOYSA-N	#N/A	#N/A	0.0101985	1
TSHR	8369	TSHR	O=c1ccoc(c1O)C	UNPD156476	XPCTZQVDEJYUGT-UHFFFAOYSA-N	#N/A	#N/A	0.0097171	1
MAPT	8561	MAPT	CCCCCOC(=O)c1ccccc1C(=O)OCCCCC	UNPD170502	IPKKHRVROFYTEK-UHFFFAOYSA-N	#N/A	#N/A	0.0151201	1
BCR	8601	BCR	Oc1cc2ccccc2c(c1)O	TCMSP5517	XOOMNEFVDUTJPP-UHFFFAOYSA-N	#N/A	#N/A	0.024711	1
TSHR	8857	TSHR	CCOC(=O)C	UNPD50304	XEKOWRVHYACXOJ-UHFFFAOYSA-N	#N/A	#N/A	0.00979661	1
TP53	9215	TP53	c1ccc2c(c1)nc1c(c2)cccc1	UNPD181818	DZBUGLKDJFMEHC-UHFFFAOYSA-N	#N/A	#N/A	0.010633	1
SMO	10098	SMO	O[C@H]1CC[C@]2(C(=CC[C@@H]3[C@@H]2C(=O)C2=C(C)[C@]4(CC[C@@H]32)O[C@H]2[C@H]([C@H]4C)NC[C@H](C2)C)C1)C	TCMTW51055	CLEXYFLHGFJONT-DNMILWOZSA-N	#N/A	#N/A	0.13597	1
TSHR	10156	TSHR	COc1c(OC)cc2c(c1OC)c1ccc(c(=O)cc1C(CC2)NC(=O)C)O	UNPD11343	PRGILOMAMBLWNG-UHFFFAOYSA-N	#N/A	#N/A	0.00957695	1
RELA	10658	RELA	O=c1ccc2c(o1)c1ccoc1cc2	UNPD108698	XDROKJSWHURZGO-UHFFFAOYSA-N	#N/A	#N/A	0.0227487	1
MAPT	10659	MAPT	C=CCc1cc(OC)c2c(c1OC)OCO2	UNPD196228	QQRSPHJOOXUALR-UHFFFAOYSA-N	#N/A	#N/A	0.0114881	1
TSHR	10666	TSHR	N#Cc1c(OC)ccn(c1=O)C	UNPD100599	PETSAYFQSGAEQY-UHFFFAOYSA-N	#N/A	#N/A	0.00981246	1
MAPT	10797	MAPT	Cc1ccco1	UNPD151214	VQKFNUFAXTZWDK-UHFFFAOYSA-N	#N/A	#N/A	0.0150978	1
MAPT	11092	MAPT	COc1ccc(c(c1)O)C(=O)C	UNPD64073	UILPJVPSNHJFIK-UHFFFAOYSA-N	#N/A	#N/A	0.0111207	1
MIF	11715	MIF	CC(=O)CBr	UNPD181580	VQFAIAKCILWQPZ-UHFFFAOYSA-N	#N/A	#N/A	0.0547763	1
LMNA	15394	LMNA	CCC(=O)C=C	UNPD28608	JLIDVCMBCGBIEY-UHFFFAOYSA-N	#N/A	#N/A	0.00907184	1
MIF	16315	MIF	C=CCSSSCC=C	UNPD191677	UBAXRAHSPKWNCX-UHFFFAOYSA-N	#N/A	#N/A	0.0555229	1
ALDH1A1	16741	ALDH1A1	S=C=NCCc1ccccc1	UNPD76258	IZJDOKYDEWTZSO-UHFFFAOYSA-N	#N/A	#N/A	0.0122246	1
TSHR	16846	TSHR	CCCOC(=O)c1ccccc1	UNPD137764	UDEWPOVQBGFNGE-UHFFFAOYSA-N	#N/A	#N/A	0.00992699	1
TSHR	17100	TSHR	CC1=CCC(CC1)C(O)(C)C	UNPD119959	WUOACPNHFRMFPN-UHFFFAOYSA-N	#N/A	#N/A	0.00968104	1
TSHR	17198	TSHR	COc1cc(cc(c1O)OC)C(=O)C	UNPD121288	OJOBTAOGJIWAGB-UHFFFAOYSA-N	#N/A	#N/A	0.00959241	1
KDM4E	18302	KDM4E	OCCC(CO)O	UNPD116185	ARXKVVRQIIOZGF-UHFFFAOYSA-N	#N/A	#N/A	0.0198933	1
TSHR	22311	TSHR	CC1=CCC(CC1)C(=C)C	UNPD54256	XMGQYMWWDOXHJM-UHFFFAOYSA-N	#N/A	#N/A	0.00976841	1
SLC47A1	22407	SLC47A1	O=c1cccc2n1CC1CNCC2C1	UNPD154814	ANJTVLIZGCUXLD-UHFFFAOYSA-N	#N/A	#N/A	0.0733706	1
MAPT	31411	MAPT	COc1ccc2c(c1OC)C(=O)O[C@H]2[C@@H]1N(C)CCc2c1c(OC)c1c(c2)OCO1	ATCMD15218	AKNNEGZIBPJZJG-QZTJIDSGSA-N	#N/A	#N/A	0.00889955	1
DRD1	41169	DRD1	COc1cc2CCN[C@@H]3c2c(c1OC)c1ccccc1C3	ATCMD15728	QQKAHDMMPBQDAC-AWEZNQCLSA-N	#N/A	#N/A	0.000584402	1
MGAM	51683	MGAM	O[C@@H]1CN2[C@@H]([C@@H]1O)C(O)CCC2	ATCMD20427	FXUAIOOAOAVCGD-WCTZXXKLSA-N	#N/A	#N/A	0.000579872	1
TSHR	68437	TSHR	COc1c(OC)ccc2c1C(=O)OC2	UNPD123952	ORFFGRQMMWVHIB-UHFFFAOYSA-N	#N/A	#N/A	0.00967117	1
TSHR	71655	TSHR	N=C(N1CCOCC1)N=C(N)N	TCMID6887	KJHOZAZQWVKILO-UHFFFAOYSA-N	#N/A	#N/A	0.00976705	1
MIF	72503	MIF	O=C[C@H]1C(=CC[C@@H]2[C@]1(C)CCCC2(C)C)C=O	ATCMD17582	AZJUJOFIHHNCSV-KCQAQPDRSA-N	#N/A	#N/A	0.0547728	1
P2RX1	76581	P2RX1	COCc1c(CO)cnc(c1O)C	UNPD84684	SVINQHQHARVZFF-UHFFFAOYSA-N	#N/A	#N/A	0.00137271	1
TAAR1	89576	TAAR1	NCCc1c[nH]c2c1cc(OCc1ccccc1)cc2	UNPD128548	WKPDXBXNJWWWGQ-UHFFFAOYSA-N	#N/A	#N/A	0.00109085	1
LMNA	91467	LMNA	O=C1CC(CC(=O)N1)CC(C1CC(C)(O)CC(C1=O)C)O	UNPD119792	NFDQYBUVHVRNNY-UHFFFAOYSA-N	#N/A	#N/A	0.000347763	1
TSHR	92094	TSHR	C[C@@H](CCC[C@]1(C)CCc2c(O1)c(C)cc(c2)O)CCC[C@@H](CCCC(C)C)C	ATCMD21338	GZIFEOYASATJEH-VHFRWLAGSA-N	#N/A	#N/A	0.00972136	1
MAPT	95695	MAPT	COc1ccc(c(c1)C=O)O	UNPD171222	FZHSPPYCNDYIKD-UHFFFAOYSA-N	#N/A	#N/A	0.00063186	1
TP53	97142	TP53	COc1cc(OC)c2c(c1)oc(c(c2=O)O)c1ccc(c(c1)OC)OC	UNPD160624	AAASNKNLMQBKFV-UHFFFAOYSA-N	#N/A	#N/A	0.00844439	1
LMNA	98082	LMNA	OC1CC(OC1COC(c1ccccc1)(c1ccccc1)c1ccccc1)n1cc(C)c(=O)[nH]c1=O	UNPD154302	FZDHVUVGQXVYOP-UHFFFAOYSA-N	#N/A	#N/A	0.000457037	1
PYGL	124702	PYGL	OC[C@H]1N[C@@H]([C@H]([C@@H]1O)O)CO	ATCMD6015	PFYHYHZGDNWFIF-KVTDHHQDSA-N	#N/A	#N/A	0.0873299	1
TRPA1	159055	TRPA1	O=C1C[C@@H]2C([C@@]1(C)CC2)(C)C	ATCMD3043	DSSYKIVIOFKYAU-XCBNKYQSSA-N	#N/A	#N/A	0.00926062	1
BCR	171548	BCR	OC(=O)CCCC[C@@H]1SC[C@H]2[C@@H]1NC(=O)N2	ATCMD2390	YBJHBAHKTGYVGT-ZKWXMUAHSA-N	DB00121	approved; nutraceutical	0.119221	1
TNFRSF1A	185617	TNFRSF1A	OC(=O)[C@H]1O[C@@H](Oc2cc3oc(cc(=O)c3c(c2O)O)c2ccc(cc2)O)[C@@H]([C@H]([C@@H]1O)O)O	TCMID7580	DJSISFGPUUYILV-ZFORQUDYSA-N	#N/A	#N/A	0.0143032	1
MAPT	266934	MAPT	OCC1OC(C(C1O)O)n1cnc(c1N)C(=O)N	UNPD126948	RTRQQBHATOEIAF-UHFFFAOYSA-N	#N/A	#N/A	0.015065	1
TSHR	336326	TSHR	Cn1c2OC(C)(C)CCc2c(=O)c2c1cccc2	UNPD84150	ZMHAAVLGKGXDBY-UHFFFAOYSA-N	#N/A	#N/A	0.00969661	1
TNFRSF1A	409778	TNFRSF1A	OCC1OC(OC2CC3CCC4C(C3(CC2O)C)CCC2(C4C(O)C3C2C(C2(O3)CCC(CO2)C)C)C)C(C(C1OC1OC(CO)C(C(C1OC1OC(CO)C(C(C1O)OC1OC(CO)C(C(C1O)O)O)O)OC1OCC(C(C1O)O)O)O)O)O	UNPD115685	UVYVLBIGDKGWPX-UHFFFAOYSA-N	#N/A	#N/A	0.0142802	1
TSHR	439524	TSHR	N[C@@H](C(=O)O)CC(C)C	TCMSP4646	ROHFNLRQFUQHCH-RXMQYKEDSA-N	#N/A	#N/A	0.00979988	1
HSD17B10	440266	HSD17B10	NC[C@@H](c1ccc(cc1)O)O	TCMTW23242	QHGUCRYDKWKLMG-QMMMGPOBSA-N	#N/A	#N/A	0.0122564	1
HSD17B10	441457	HSD17B10	O[C@@H](c1ccccc1)[C@@H](N)C	TCMID10169	DLNKOYKMWOXYQA-IONNQARKSA-N	DB01486	experimental; illicit	0.00965482	1
CNR1	442793	CNR1	CCCCC[C@@H](CC(=O)CCc1ccc(c(c1)OC)O)O	ATCMD8375	NLDDIKRKFXEWBK-AWEZNQCLSA-N	#N/A	#N/A	0.0306501	1
BCHE	443672	BCHE	CC(=O)O[C@@H]1[C@@H](O)C=C2[C@@H]3[C@@H]1c1cc4OCOc4cc1CN3CC2	ATCMD460	BIGUPJIJZYZJMV-VIBAHUMZSA-N	#N/A	#N/A	0.0166376	1
TSHR	449293	TSHR	OC1C[C@@H]2CC[C@H](C1)N2C	TCMID1595	CYHOMWAPJJPNMW-DHBOJHSNSA-N	#N/A	#N/A	0.00962113	1
LMNA	454742	LMNA	O=Cc1ccc(s1)c1ccc(s1)c1cccs1	UNPD84754	PMPDDPJYARBNGV-UHFFFAOYSA-N	#N/A	#N/A	0.00122924	1
TSHR	601861	TSHR	COc1cc2OCOc2cc1C=O	UNPD132496	NCIYDDIPUGCVKX-UHFFFAOYSA-N	#N/A	#N/A	0.00960387	1
TSHR	606422	TSHR	CC(=O)c1ccc(s1)c1cccs1	UNPD69695	GKGAOTYPISAEEK-UHFFFAOYSA-N	#N/A	#N/A	0.0096511	1
ACHE	607775	ACHE	COc1ccc2c(c1)c1ccncc1[nH]2	UNPD158545	OIKFIPOMXWTXJJ-UHFFFAOYSA-N	#N/A	#N/A	0.00109371	1
TP53	629853	TP53	COc1cc(OC)c2c(c1)occ(c2=O)c1ccc2c(c1)OCO2	UNPD160862	IMPPSJRGMZYGJW-UHFFFAOYSA-N	#N/A	#N/A	0.00846157	1
MAPT	629965	MAPT	COc1cccc(c1c1cc(=O)c2c(o1)ccc(c2OC)OC)OC	UNPD30717	PBQMALAAFQMDSP-UHFFFAOYSA-N	#N/A	#N/A	0.000695069	1
TSHR	928465	TSHR	O=c1ccc2c(o1)cc1c(c2OC[C@H]2OC2(C)C)cco1	TCMTW17553	QTAGQHZOLRFCBU-CYBMUJFWSA-N	#N/A	#N/A	0.0096429	1
MAPT	3080557	MAPT	S=C=NCCCCS(=O)(=O)C	UNPD188216	WNCZPWWLBZOFJL-UHFFFAOYSA-N	#N/A	#N/A	0.0149061	1
MAPT	3363314	MAPT	CC(=O)Oc1cc2OC(c3ccc(c(c3)OC(=O)C)OC(=O)C)C(Cc2c(c1)OC(=O)C)OC(=O)C	UNPD135499	BKYWAYNSDFXIPL-UHFFFAOYSA-N	#N/A	#N/A	0.00901953	1
TSHR	3800367	TSHR	COC1C2C3(CCC(C42C(C1(O)C1(O)CC(C2CC4C1C2OC)OC)N(C3)CC)OC)COC(=O)c1ccccc1N	UNPD134019	NNDHDYDFEDRMGH-UHFFFAOYSA-N	#N/A	#N/A	0.00967472	1
TSHR	5273469	TSHR	O=C(/C=C/c1ccccc1)OCc1ccccc1	UNPD144885	NGHOLYJTSCBCGC-VAWYXSNFSA-N	#N/A	#N/A	0.00981268	1
GSTA1	5280666	GSTA1	COc1cc(ccc1O)c1cc(=O)c2c(o1)cc(cc2O)O	UNPD79322	SCZVLDHREVKTSH-UHFFFAOYSA-N	#N/A	#N/A	0.0154847	1
MAPT	5281567	MAPT	COC1=CC(=O)O[C@H](C1)/C=C/c1ccc2c(c1)OCO2	ATCMD14774	GTEXBOVBADJOQH-FWEMWIAWSA-N	#N/A	#N/A	0.00960504	1
PLG	5281604	PLG	COc1cc(O)cc2c1c(=O)c(c(o2)c1ccc(c(c1)O)O)O	UNPD122104	RJBAXROZAXAEEM-UHFFFAOYSA-N	#N/A	#N/A	0.085301	1
MAPK14	5281654	MAPK14	COc1cc(ccc1O)c1oc2cc(O)cc(c2c(=O)c1O)O	UNPD60650	IZQSVPBOUDKVDZ-UHFFFAOYSA-N	#N/A	#N/A	0.0152254	1
GSTP1	5281692	GSTP1	Oc1ccc2c(c1)oc(c(c2=O)O)c1cc(O)c(c(c1)O)O	UNPD169417	SOEDEYVDCDYMMH-UHFFFAOYSA-N	#N/A	#N/A	0.0178312	1
MAPT	5281719	MAPT	COc1cc(/C=C/c2ccccc2)cc(c1)O	UNPD191374	JVIXPWIEOVZVJC-BQYQJAHWSA-N	#N/A	#N/A	0.0153018	1
CNR1	5281794	CNR1	CCCCC/C=C/C(=O)CCc1ccc(c(c1)OC)O	UNPD154606	OQWKEEOHDMUXEO-BQYQJAHWSA-N	#N/A	#N/A	0.0307174	1
TSHR	5281915	TSHR	COC1=C(OC)C(=O)C(=C(C1=O)C/C=C(/CC/C=C(/CC/C=C(/CC/C=C(/CC/C=C(/CC/C=C(/CC/C=C(/CC/C=C(/CC/C=C(/CCC=C(C)C)\C)\C)\C)\C)\C)\C)\C)\C)\C)C	UNPD149379	ACTIUHUUMQJHFO-UPTCCGCDSA-N	DB09270	experimental	0.00968161	1
TSHR	5282759	TSHR	CCCCCCC/C=C\CCCCCCCCC(=O)O	UNPD130606	QXJSBBXBKPUZAA-HJWRWDBZSA-N	#N/A	#N/A	0.00993046	1
ALOX15	5284649	ALOX15	Oc1ccc(cc1)c1coc2c(c1=O)cc(c(c2)O)O	UNPD157673	GYLUFQJZYAJQDI-UHFFFAOYSA-N	#N/A	#N/A	0.0401068	1
CNR1	5317148	CNR1	Cc1cc(O)c(c(c1)O)C[C@H]1[C@](C)(O)CC[C@@H]2[C@]1(C)CCCC2(C)C	ATCMD842	APLGGFLATUGFCO-YUVXSKOASA-N	#N/A	#N/A	0.0306934	1
NOD2	5318267	NOD2	OC[C@H]1O[C@@H](Oc2ccc3c(c2)occ(c3=O)c2ccc(c(c2)O)OC)[C@@H]([C@H]([C@@H]1O)O)O	TCMID1035	WACBUPFEGWUGPB-MIUGBVLSSA-N	#N/A	#N/A	0.0187799	1
BCR	5318763	BCR	Oc1ccc(cc1)c1oc2cc(O)cc(c2c(=O)c1O[C@H]1O[C@H](C)[C@H]([C@@H]([C@@H]1O)O)O)O	TCMTW20718	SOSLMHZOJATCCP-QBWVUYDZSA-N	#N/A	#N/A	0.0247115	1
PTGS1	5319925	PTGS1	CC(=CCc1c(oc2c(c1=O)c(O)c1c(c2)OC(C=C1)(C)C)c1ccc(cc1O)O)C	UNPD174185	XIWCDUHPYMOFIL-UHFFFAOYSA-N	#N/A	#N/A	0.0498852	1
PTGS1	5320767	PTGS1	O=C1CC[C@@]2(O1)[C@@H](C)CC[C@@H]1[C@H]([C@]2(C)O)OC(=O)C1=C	ATCMD18022	IRPFOXRBPHCCTG-JISBIHODSA-N	#N/A	#N/A	0.0497096	1
PTGS1	5326145	PTGS1	COc1cc2c(cc1O)oc1c(c2=O)c(OC)c(cc1)O	UNPD31249	SROSPGQNFCAFNO-UHFFFAOYSA-N	#N/A	#N/A	0.0498091	1
HSD17B10	5354284	HSD17B10	Oc1cc(O)c2c(c1)oc(=O)cc2C	TCMSP1628	QNVWGEJMXOQQPM-UHFFFAOYSA-N	#N/A	#N/A	0.0116849	1
MIF	5364752	MIF	CC/C=C/C=O	UNPD176384	DTCCTIQRPGSLPT-ONEGZZNKSA-N	#N/A	#N/A	0.0548342	1
SOAT2	5372162	SOAT2	CC(CNC(=O)/C=C/C=C/CCCC/C=C/c1ccc2c(c1)OCO2)C	UNPD102590	RPOYGOULCHMVBB-ADDDGJNWSA-N	#N/A	#N/A	0.115354	1
PTGS1	5386591	PTGS1	C=CCSS/C=C/CS(=O)CC=C	UNPD141703	IXELFRRANAOWSF-FNORWQNLSA-N	#N/A	#N/A	0.0498025	1
MAPT	5391149	MAPT	Oc1ccc2c(c1)oc(cc2=O)c1ccccc1O	UNPD55005	NUGPQONICGTVNA-UHFFFAOYSA-N	#N/A	#N/A	0.0153131	1
PTGS1	5420805	PTGS1	CC1=CCC[C@@]2(C)O[C@H]2[C@@H]2[C@@H](CC1)C(=C)C(=O)O2	UNPD218142	KTEXNACQROZXEV-QLIGOWBFSA-N	#N/A	#N/A	0.0497127	1
CHRFAM7A	5462194	CHRFAM7A	[O-]C(=O)/C=C/C[N+](C)(C)C	CNPD30584	GUYHPGUANSLONG-SNAWJCMRSA-N	#N/A	#N/A	0.000581271	1
PLG	5464381	PLG	COc1cc(O)c2c(c1)oc(cc2=O)c1ccc(c(c1)OC)O	UNPD127333	ROCUOVBWAWAQFD-UHFFFAOYSA-N	#N/A	#N/A	0.0437152	1
PLA2G1B	5492110	PLA2G1B	Oc1cc(O)c2c(c1)oc(cc2=O)c1ccc(cc1)Oc1cc(ccc1O)c1cc(=O)c2c(o1)cc(cc2O)O	UNPD31779	NNPGECDACGBKDH-UHFFFAOYSA-N	#N/A	#N/A	0.0768026	1
RELA	5495925	RELA	COc1c(O)cc2c(c1CC=C(C)C)c(=O)c1c(o2)cc(c(c1O)CC=C(C)C)OC	UNPD40382	YRKKJHJIWCRNCW-UHFFFAOYSA-N	#N/A	#N/A	0.0228181	1
PTGS1	5748382	PTGS1	Oc1c(O)ccc2c1oc1ccccc1c2=O	UNPD38574	YFVCSEXMOBEPQB-UHFFFAOYSA-N	#N/A	#N/A	0.0498038	1
MAPT	5889042	MAPT	Oc1ccc(cc1)/C=C/C(=O)c1ccc2c(c1O)C=CC(O2)(C)C	UNPD110926	IQHPDUUSMBMDGN-WEVVVXLNSA-N	#N/A	#N/A	0.000561386	1
RELA	6293081	RELA	COc1cc(O)c(c(c1)OC)C(=O)/C=C/c1ccc(cc1)O	UNPD90335	UXUFMIJZNYXWDX-VMPITWQZSA-N	#N/A	#N/A	0.0227972	1
RELA	6440856	RELA	O=C1C=CC[C@@H](O1)/C=C/c1ccccc1	ATCMD8924	RLGHFVLWYYVMQZ-BZYZDCJZSA-N	#N/A	#N/A	0.0227812	1
TSHR	6604218	TSHR	OC[C@H](COc1ccccc1OC)O	TCMSP7578	HSRJKNPTNIJEKV-MRVPVSSYSA-N	#N/A	#N/A	0.00975078	1
TSHR	6971047	TSHR	OC(=O)[C@@H]1CCCN1	ATCMD17846	ONIBWKKTOPOVIA-BYPYZUCNSA-N	DB00172	approved; nutraceutical	0.00970663	1
THRA	7058163	THRA	OC(=O)[C@H](Cc1cc(I)c(c(c1)I)O)N	TCMTW49470	NYPYHUZRZVSYKL-ZETCQYMHSA-N	DB03374	experimental	0.000863343	1
TP53	7251175	TP53	C/C(=C/COc1c2ccoc2cc2c1ccc(=O)o2)/CCC=C(C)C	UNPD14264	DBMJZOMNXBSRED-DHDCSXOGSA-N	#N/A	#N/A	0.00838114	1
ESR2	10265236	ESR2	COc1cc2oc(cc2cc1O)c1ccc(cc1O)O	UNPD57897	KJOUKFLQGCLIOG-UHFFFAOYSA-N	#N/A	#N/A	0.115563	1
ESR2	10266789	ESR2	COc1cc(O)c2c(c1)oc(c2C=O)c1ccc(cc1O)O	UNPD46573	MYAHOBWCBIQQLV-UHFFFAOYSA-N	#N/A	#N/A	0.115788	1
SENP8	10450920	SENP8	COc1cc(O)c(c(c1C(=O)CCc1ccc(cc1)O)O)CC=C(C)C	UNPD96079	SVTCZHIDEDUTBH-UHFFFAOYSA-N	#N/A	#N/A	0.0715572	1
LMNA	10457096	LMNA	O=C(C1=C(CCC1)C(=O)O)Nc1c(F)c(F)c(c(c1F)F)c1cccc(c1)OC(F)(F)F	TCMID7063	HXVDQTDBVMYWOO-UHFFFAOYSA-N	#N/A	#N/A	0.000356202	1
PTGS1	10643865	PTGS1	CC(=O)N[C@H]1Oc2ccc(cc2O[C@@H]1c1ccc(c(c1)O)O)CCNC(=O)C	TCMTW18078	MXCCEJSRHCXZMV-UXHICEINSA-N	#N/A	#N/A	0.0497797	1
RELA	10759713	RELA	COc1c2ccc(c1O)CCCCC(=O)CCc1cc(O2)c(O)cc1	UNPD89321	QNIHUQUCNQQCFX-UHFFFAOYSA-N	#N/A	#N/A	0.0227404	1
HRH3	11434210	HRH3	CN(CCCOc1c(Br)cc(cc1Br)/C=C/C(=O)NCCCOc1c(Br)cc(cc1Br)CCN(C)C)C	UNPD93324	PKWUEPCKAUUBLY-BQYQJAHWSA-N	#N/A	#N/A	0.000396735	1
TP53	11869417	TP53	C1Oc2c(O1)cc(cc2)[C@@H]1OC[C@@H]2[C@H]1CO[C@@H]2c1ccc2c(c1)OCO2	TCMID8044	PEYUIKBAABKQKQ-FQZPYLGXSA-N	#N/A	#N/A	0.00830302	1
TSHR	12313750	TSHR	COc1c(OC)ccc2c1CN1CCc3c([C@@H]1[C@@H]2O)cc1c(c3)OCO1	ATCMD16074	FLSSXYPKPLFNLK-RTBURBONSA-N	#N/A	#N/A	0.00959216	1
AGL	14678632	AGL	OCC1OCC(C(C1O)O)NC1C=C(CO)C(C(C1O)O)O	UNPD116288	OCTNNXHKAOLDJL-UHFFFAOYSA-N	#N/A	#N/A	0.000482215	1
RELA	15560076	RELA	C/C=C(/C(=O)O[C@@H]1CC(C)(C)C[C@@H]2[C@]1(CC[C@@]1(C2=CC[C@H]2[C@@]1(C)CC[C@@H]1[C@]2(C)CCC(=O)C1(C)C)C)C(=O)O)\C	UNPD219851	KCLIRHUTOPOHKJ-DSYIDUNCSA-N	#N/A	#N/A	0.022802	1
RELA	15560077	RELA	CC(=CC(=O)O[C@@H]1CC(C)(C)C[C@@H]2[C@]1(CC[C@@]1(C2=CC[C@H]2[C@@]1(C)CC[C@@H]1[C@]2(C)CCC(=O)C1(C)C)C)C(=O)O)C	ATCMD12450	VYPAPFHUHDWCBI-QQAPFUPGSA-N	#N/A	#N/A	0.0227975	1
TSHR	15820879	TSHR	C[Se]CCC(C(=O)O)N	UNPD150325	RJFAYQIBOAGBLC-UHFFFAOYSA-N	#N/A	#N/A	0.00979418	1
PTGS1	16680045	PTGS1	COc1c2CCc3c(Oc2c(c(c1O)C)OC)cccc3O	UNPD77070	XVMLDDFWHNGJME-UHFFFAOYSA-N	#N/A	#N/A	0.0498182	1
LTB4R2	20704716	LTB4R2	N=C1N(C)C(=O)/C(=N\c2nc(c(n2C)Cc2ccc3c(c2)OCO3)Cc2ccc3c(c2)OCO3)/N1C	UNPD173205	RZKRATQHPLTYSI-GQZUJQTPSA-N	#N/A	#N/A	0.0881101	1
MIF	21598349	MIF	CCC1C[C@@H]2CN3[C@H]1[C@@](C2)(C(=O)OC)c1[nH]c2c(c1CC3)cccc2	TCMSP3626	NVVDQMVGALBDGE-YEEBJNCVSA-N	#N/A	#N/A	0.0273896	1
MAPT	22416364	MAPT	OC(=O)c1ccc(cc1)C(=O)O	UNPD90972	KKEYFWRCBNTPAC-UHFFFAOYSA-N	#N/A	#N/A	0.0151863	1
TSHR	22494954	TSHR	OC(=O)CCCCC(=O)O	UNPD52406	WNLRTRBMVRJNCN-UHFFFAOYSA-N	#N/A	#N/A	0.00981733	1
BCR	25113669	BCR	NC(=O)c1nc2c(N)c(Cl)c(c3c2c(c1)c(=O)n3C)N	UNPD157150	HWRGTOQGZGTNID-UHFFFAOYSA-N	#N/A	#N/A	0.0247018	1
MPEG1	25195346	MPEG1	CN[C@H](C(=O)N[C@@H](C(C)(C)C)C(=O)N1CC[C@@H]2[C@H]1[C@H](CC2)NC(=O)c1cccc2c1cccc2)C	TCMID10147	FTXKVJPIFDKIID-YBAXTEPTSA-N	#N/A	#N/A	0.0477311	1
CASP1	44419695	CASP1	COc1ccc2c(c1)c1cc[n+](c(c1[nH]2)C)C	UNPD112742	GKOBEAWUMYEQIP-UHFFFAOYSA-O	#N/A	#N/A	0.00647295	1
TNFRSF1A	53321447	TNFRSF1A	OC/C(=C\Cc1c(oc2c(c1=O)c(O)cc1c2C=CC(O1)(C)C)c1cc(O)c(cc1O)O)/C	UNPD200032	UTYRRYOOGHLXNT-QCDXTXTGSA-N	#N/A	#N/A	0.0143172	1
TSHR	54675761	TSHR	CC(=O)C1=C(O)C2N(C1=O)C(C1C2c2c[nH]c3c2c(C1)ccc3)(C)C	UNPD151811	SZINUGQCTHLQAZ-UHFFFAOYSA-N	#N/A	#N/A	0.00955073	1
HTR2C	102060491	HTR2C	Oc1ccc(cc1)C(C(=O)O)NC(=O)C1Cc2ccc(cc2)Oc2cc3C(C(=O)NC(C(=O)N1C)c1cc(Cl)c(c(c1)Cl)O)NC(=O)C(NC(=O)C(NC(=O)C(=O)c1cc(Cl)c(c(c1)Cl)O)Cc1c4ccc(c(c2O)c3)cc4[nH]c1)c1cc(Cl)c(c(c1)Cl)O	UNPD119513	JJGZGELTZPACID-UHFFFAOYSA-N	#N/A	#N/A	0.000335436	1
TSHR	453|5780	TSHR	OCC(C(C(C(CO)O)O)O)O	HIT096|UNPD136254	FBPFZTCFMRRESA-JGWLITMVSA-N|FBPFZTCFMRRESA-UHFFFAOYSA-N	DB01638	approved	0.00967725	1
PRKDC	241	PRKDC	c1ccccc1	UNPD191203	UHOVQNZJYSORNB-UHFFFAOYSA-N	#N/A	#N/A	0.0102252	1
TYR	242	TYR	[O-]C(=O)c1ccccc1	UNPD128843	WPYMKLBDIGXBTP-UHFFFAOYSA-M	#N/A	#N/A	0.058275	1
TRPA1	261	TRPA1	CCCC=O	UNPD26934	ZTQSAGDEMFDKMZ-UHFFFAOYSA-N	#N/A	#N/A	0.0152074	1
TRPA1	366	TRPA1	CC(=O)Oc1ccc2c(c1)oc(=O)cc2C	UNPD12991	HXVZGASCDAGAPS-UHFFFAOYSA-N	#N/A	#N/A	0.0150415	1
TP53	379	TP53	CCCCCCCC(=O)O	UNPD194225	WWZKQHOCKIZLMA-UHFFFAOYSA-N	DB04519	experimental	0.00593685	1
ESR2	450	ESR2	Oc1ccc2c(c1)CCC1C2CCC2(C1CCC2O)C	UNPD132347	VOXZDWNPVJITMN-UHFFFAOYSA-N	#N/A	#N/A	0.115468	1
TP53	546	TP53	OC(=O)CP(=O)(O)O	UNPD129788	XUYJLQHKOGNDPB-UHFFFAOYSA-N	DB02823	experimental	0.0060541	1
NFKB1	650	NFKB1	CC(=O)C(=O)C	UNPD45978	QSJXEFYPDANLFS-UHFFFAOYSA-N	#N/A	#N/A	0.0136443	1
ALOX15	853	ALOX15	OC(=O)C(Cc1cc(I)c(c(c1)I)Oc1cc(I)c(c(c1)I)O)N	UNPD116769	XUIIKFGFIJCVMT-UHFFFAOYSA-N	#N/A	#N/A	0.0108947	1
LMNA	995	LMNA	c1ccc2c(c1)c1ccccc1cc2	UNPD122513	YNPNZTXNASCQKK-UHFFFAOYSA-N	#N/A	#N/A	0.00727948	1
ACHE	1175	ACHE	O=c1[nH]c2c([nH]1)[nH]c(=O)[nH]c2=O	UNPD91330	LEHOTFFKMJEONL-UHFFFAOYSA-N	DB08844	experimental; investigational	0.0223469	1
P2RY11	1181	P2RY11	OC1C(COP(=O)(OP(=O)(OP(=O)(O)O)O)O)OC(C1O)n1ccc(=O)[nH]c1=O	UNPD185691	PGAVKCOVUIYSFO-UHFFFAOYSA-N	#N/A	#N/A	0.074151	1
LMNA	1254	LMNA	CC1CCC(C(C1)O)C(C)C	UNPD104790	NOOLISFMXDJSKH-UHFFFAOYSA-N	#N/A	#N/A	0.000437888	1
FASN	1302	FASN	COc1ccc2c(c1)ccc(c2)C(C(=O)O)C	UNPD145726	CMWTZPSULFXXJA-UHFFFAOYSA-N	#N/A	#N/A	0.013066	1
LMNA	1662	LMNA	OC(=O)CC(CC(=O)O)(O)C	UNPD12362	NPOAOTPXWNWTSH-UHFFFAOYSA-N	DB04377	experimental	0.000426183	1
MAPT	2236	MAPT	COc1cccc2c1cc(N(=O)=O)c1c2c2OCOc2cc1C(=O)O	UNPD196900	BBFQZRXNYIEMAW-UHFFFAOYSA-N	#N/A	#N/A	0.0109835	1
HKDC1	2700	HKDC1	CCOC(=O)CCCCCCCCCCCCC1C=CCC1	UNPD207675	FDGHZUQYDACRTA-UHFFFAOYSA-N	#N/A	#N/A	0.0208443	1
TP53	3039	TP53	COP(=O)(OC=C(Cl)Cl)OC	TCMSP7750	OEBRKCOSUFCWJD-UHFFFAOYSA-N	#N/A	#N/A	0.00604254	1
MAPT	3446	MAPT	NCC1(CCCCC1)CC(=O)O	UNPD94804	UGJMXCAKCUNAIE-UHFFFAOYSA-N	DB00996	approved; investigational	0.00595362	1
HSD17B10	3512	HSD17B10	COC1=CC(=O)CC(C21Oc1c(C2=O)c(OC)cc(c1Cl)OC)C	UNPD153331	DDUHZTYCFQRHIY-UHFFFAOYSA-N	#N/A	#N/A	0.0111881	1
TP53	3830	TP53	c1coc(c1)CNc1ncnc2c1[nH]cn2	UNPD14587	QANMHLXAZMSUEX-UHFFFAOYSA-N	#N/A	#N/A	0.00876334	1
TP53	4133	TP53	COC(=O)c1ccccc1O	UNPD114370	OSWPMRLSEDHDFF-UHFFFAOYSA-N	#N/A	#N/A	0.00613149	1
NR1H3	4697	NR1H3	O=C1C=C2C(OC1C(O)(C)C)CCC1(C2(O)CCC2C1(C)c1[nH]c3c(c1C2)cccc3)C	UNPD183943	ACNHBCIZLNNLRS-UHFFFAOYSA-N	#N/A	#N/A	0.177257	1
CASP1	4811	CASP1	CNC(=O)Oc1ccc2c(c1)C1(C)CCN(C1N2C)C	UNPD11811	PIJVFDBKTWXHHD-UHFFFAOYSA-N	#N/A	#N/A	0.00649245	1
TRPA1	4886	TRPA1	CCCCOc1ccc(cc1)OCCCN1CCOCC1	TCMSP8107	DQKXQSGTHWVTAD-UHFFFAOYSA-N	DB09345	approved	0.0149957	1
LMNA	5114	LMNA	CC1CCC2(C3(C1O)OC1(C4(C3(O)C(C2(C)C1)(O)C(C4(O)C(C)C)OC(=O)c1[nH]ccc1)C)O)O	UNPD38747	JJSYXNQGLHBRRK-UHFFFAOYSA-N	#N/A	#N/A	0.000367661	1
KDM4E	5297	KDM4E	OCC1OC(OC2C(OC3C(O)C(O)C(C(C3NC(=N)N)O)NC(=N)N)OC(C2(O)C=O)C)C(C(C1O)O)NC	UNPD181749	UCSJYZPVAKXKNQ-UHFFFAOYSA-N	#N/A	#N/A	0.01132	1
MAPT	5304	MAPT	O=C1CC2OCC=C3C4C2C2N1c1ccccc1C12CCN(C1C4)C3	UNPD136731	QMGVPVSNSZLJIA-UHFFFAOYSA-N	#N/A	#N/A	0.0135073	1
HKDC1	5422	HKDC1	COc1c(OC)cc2c3c1Oc1cc4c(cc1OC)CCN(C4Cc1ccc(Oc4cc(CC3N(CC2)C)ccc4OC)cc1)C	UNPD190790	WVTKBKWTSCPRNU-UHFFFAOYSA-N	#N/A	#N/A	0.0208327	1
TRPA1	6584	TRPA1	COC(=O)C	UNPD87801	KXKVLQRXCPHEJC-UHFFFAOYSA-N	#N/A	#N/A	0.0150231	1
TRPA1	6625	TRPA1	Clc1ccc(cc1)S(=O)(=O)c1ccc(cc1)Cl	TCMSP8743	GPAPPPVRLPGFEQ-UHFFFAOYSA-N	#N/A	#N/A	0.0152221	1
UGT1A9	6776	UGT1A9	Oc1ccc2c(c1)C(=O)c1c(C2=O)cc(cc1)O	UNPD60040	APAJFZPFBHMFQR-UHFFFAOYSA-N	#N/A	#N/A	0.0221557	1
MIF	6989	MIF	Cc1ccc(c(c1)O)C(C)C	UNPD59147	MGSRCZKZVOBKFT-UHFFFAOYSA-N	DB02513	approved	0.0274263	1
MAPT	7013	MAPT	c1ccc(cc1)Nc1cccc2c1cccc2	UNPD17069	XQVWYOYUZDUNRW-UHFFFAOYSA-N	#N/A	#N/A	0.0129457	1
TRPA1	7151	TRPA1	COC(=O)c1cccnc1	UNPD131838	YNBADRVTZLEFNH-UHFFFAOYSA-N	#N/A	#N/A	0.0149899	1
TRPA1	7175	TRPA1	CCCOC(=O)c1ccc(cc1)O	UNPD99753	QELSKZZBTMNZEB-UHFFFAOYSA-N	#N/A	#N/A	0.0149849	1
TP53	7239	TP53	Clc1ccccc1Cl	UNPD154253	RFFLAFLAYFXFSW-UHFFFAOYSA-N	#N/A	#N/A	0.00622196	1
MAPT	7438	MAPT	CC(=C)C1CC=C(C(C1)O)C	UNPD133087	BAVONGHXFVOKBV-UHFFFAOYSA-N	#N/A	#N/A	0.00884889	1
MAPT	7814	MAPT	Nc1ccc(cc1)N	TCMID11173	CBCKQZAAMUWICA-UHFFFAOYSA-N	#N/A	#N/A	0.0135196	1
TRPA1	7853	TRPA1	NCC=C	UNPD3842	VVJKKWFAADXIJK-UHFFFAOYSA-N	#N/A	#N/A	0.0157087	1
TP53	8003	TP53	CCCCC	UNPD6470	OFBQJSOFQDEBGM-UHFFFAOYSA-N	#N/A	#N/A	0.00603182	1
MAPT	8550	MAPT	COC(=O)[C@@H]1[C@@H](OC)[C@@H](C[C@H]2[C@@H]1C[C@H]1N(C2)CCc2c1[nH]c1c2cccc1)OC(=O)c1cc(OC)c(c(c1)OC)OC	ATCMD5237	CVBMAZKKCSYWQR-WCGOZPBSSA-N	DB01089	approved	0.0136425	1
MAPT	8815	MAPT	COc1ccc(cc1)CC=C	UNPD151669	ZFMSMUAANRJZFM-UHFFFAOYSA-N	#N/A	#N/A	0.0114094	1
MAOA	8991	MAOA	COc1cccc(c1O)C=O	UNPD82641	JJVNINGBHGBWJH-UHFFFAOYSA-N	#N/A	#N/A	0.000728953	1
PNP	9171	PNP	c1ccc2c(c1)c1ccc3c(c1cc2)cccc3	UNPD107282	WDECIBYCCFPHNR-UHFFFAOYSA-N	#N/A	#N/A	0.110537	1
HPRT1	9196	HPRT1	c1ccc2c(c1)c1[nH]c3c(c1cc2)cccc3	UNPD67744	MYKQKWIPLZEVOW-UHFFFAOYSA-N	#N/A	#N/A	0.00218544	1
CASP1	9651	CASP1	COc1ccc2c3c1O[C@@H]1[C@@]3(CCN(C2)C)C=C[C@@H](C1)O	ATCMD8063	ASUTZQLVASHGKV-JDFRZJQESA-N	DB00674	approved	0.00648517	1
MAPT	10207	MAPT	OCc1cc(O)c2c(c1)C(=O)c1c(C2=O)c(O)ccc1	UNPD75931	YDQWDHRMZQUTBA-UHFFFAOYSA-N	#N/A	#N/A	0.0140094	1
MAPT	10228	MAPT	COc1ccc2c(c1CC=C(C)C)oc(=O)cc2	UNPD151606	MBRLOUHOWLUMFF-UHFFFAOYSA-N	#N/A	#N/A	0.000588559	1
NOS3	11379	NOS3	Nc1ccc2c(n1)cccc2	UNPD162363	GCMNJUJAKQGROZ-UHFFFAOYSA-N	#N/A	#N/A	0.120254	1
TRPA1	11604	TRPA1	C=CCCC#N	UNPD141094	CFEYBLWMNFZOPB-UHFFFAOYSA-N	#N/A	#N/A	0.0155793	1
AKR1B10	11970	AKR1B10	OC(=O)Cc1ccccc1O	UNPD54746	CCVYRRGZDBSHFU-UHFFFAOYSA-N	#N/A	#N/A	0.0358516	1
TRPA1	13195	TRPA1	Cc1c[nH]cn1	UNPD116432	XLSZMDLNRCVEIJ-UHFFFAOYSA-N	#N/A	#N/A	0.015047	1
AHR	13342	AHR	COc1cc2N(C)[C@@H]3[C@@]4(c2cc1[C@]1(C[C@H]2CN(CCc5c1[nH]c1c5cccc1)C[C@](C2)(O)CC)C(=O)OC)CCN1[C@H]4[C@@]([C@H]([C@]3(O)C(=O)OC)OC(=O)C)(CC)C=CC1	TCMTW54435	JXLYSJRDGCGARV-CFWMRBGOSA-N	#N/A	#N/A	0.0203508	1
TYR	13650	TYR	O=c1oc2ccccc2cc1O	UNPD109809	MJKVTPMWOKAVMS-UHFFFAOYSA-N	#N/A	#N/A	0.0583911	1
TRPA1	15294	TRPA1	COC(=O)c1ccc(cc1)C=O	UNPD52092	FEIOASZZURHTHB-UHFFFAOYSA-N	#N/A	#N/A	0.0150683	1
LMNA	16666	LMNA	C[C@@H]1CC[C@H]([C@@H](C1)O)C(C)C	ATCMD13731	NOOLISFMXDJSKH-KXUCPTDWSA-N	DB00825	approved	0.000437888	1
BCHE	19009	BCHE	COc1cc2CC[n+]3c(c2cc1OC)cc1c(c3)c(OC)c(cc1)OC	UNPD152305	QUCQEUCGKKTEBI-UHFFFAOYSA-N	#N/A	#N/A	0.0112402	1
HPGD	23497	HPGD	COC(=O)[C@H](Cc1ccc(c(c1)O)O)N	TCMSP9462	XBBDACCLCFWBSI-ZETCQYMHSA-N	#N/A	#N/A	0.0156213	1
HRAS	23725	HRAS	COc1cc(C(=O)O)c2c(c1C)OC(=O)c1c(O2)c(C=O)c(cc1C)O	UNPD110888	FUCWJKJZOHOLEO-UHFFFAOYSA-N	#N/A	#N/A	0.0947212	1
MAPT	24699	MAPT	CCCCCCCCCCCCCCCCCC(=O)OCC(CO)O	UNPD118569	VBICKXHEKHSIBG-UHFFFAOYSA-N	#N/A	#N/A	0.0135715	1
FABP5	26840	FABP5	CC(CCCC(CC(=O)O)C)CCCC(CCCC(C)C)C	UNPD128110	RLCKHJSFHOZMDR-UHFFFAOYSA-N	#N/A	#N/A	0.0582101	1
DRD1	34458	DRD1	COc1c(OC)ccc2c1CN1CCc3c(C1C2)cc1c(c3)OCO1	UNPD121066	VZTUIEROBZXUFA-UHFFFAOYSA-N	#N/A	#N/A	0.0323153	1
TRPA1	46695	TRPA1	COc1cc2C(C)NCCc2cc1O	UNPD135507	YTPRLBGPGZHUPD-UHFFFAOYSA-N	#N/A	#N/A	0.0149923	1
MAPT	53073	MAPT	COc1cc2c(cc1OC)c(C)c1c3c2c(OC)c(OC)cc3CCN1C	UNPD198861	RBCAXOSUUINIHP-UHFFFAOYSA-N	#N/A	#N/A	0.0137273	1
TP53	62389	TP53	c1ccc(cc1)CNc1ncnc2c1nc[nH]2	UNPD128909	NWBJYWHLCVSVIJ-UHFFFAOYSA-N	#N/A	#N/A	0.00617872	1
TNKS2	63112	TNKS2	O=c1[nH]cnc2c1cccc2	UNPD26182	QMNUDYFKZYBWQX-UHFFFAOYSA-N	#N/A	#N/A	0.0275144	1
MAPT	63121	MAPT	O=c1[nH]c(Cc2ccccc2)nc2c1cccc2	UNPD110087	ZDUVLDCZFKNYHH-UHFFFAOYSA-N	#N/A	#N/A	0.0137588	1
TNKS2	63306	TNKS2	Cc1nc2c(O)cccc2c(=O)[nH]1	UNPD198873	YJDAOHJWLUNFLX-UHFFFAOYSA-N	DB02690	experimental	0.0204322	1
LMNA	65110	LMNA	O[C@@H]1[C@H](O)[C@H](O[C@H]1n1cnc(c1N)C(=O)N)COP(=O)(O)O	TCMID7222	NOTGFIUVDGNKRI-UUOKFMHZSA-N	#N/A	#N/A	0.000511479	1
CASP1	65719	CASP1	CNC(=O)Oc1ccc2c(c1)[C@]1(C)CCN(O[C@@H]1N2C)C	ATCMD7362	CNBHDDBNEKKMJH-ZFWWWQNUSA-N	#N/A	#N/A	0.00649328	1
TRPA1	67114	TRPA1	CCN(c1ccc(cc1)C=O)CC	UNPD105991	MNFZZNNFORDXSV-UHFFFAOYSA-N	#N/A	#N/A	0.0151404	1
TRPA1	69301	TRPA1	COc1cc(OC)cc(c1)OC	UNPD55591	LKUDPHPHKOZXCD-UHFFFAOYSA-N	#N/A	#N/A	0.0149757	1
LMNA	69602	LMNA	CC(=O)NCCc1c[nH]cn1	UNPD157721	XJWPISBUKWZALE-UHFFFAOYSA-N	DB04622	experimental	0.000505812	1
HPGD	71082	HPGD	N[C@@H](C(=O)O)CCCN	TCMSP5754	AHLPHDHHMVZTML-SCSAIBSYSA-N	#N/A	#N/A	0.0155749	1
PCNA	71212	PCNA	OC(=O)[C@@H](Cc1cc(I)c(c(c1)I)Oc1ccc(c(c1)I)O)N	TCMTW54189	AUYYCJSJGJYCDS-GFCCVEGCSA-N	#N/A	#N/A	0.0625874	1
DRD2	72301	DRD2	COc1cc2CCN3[C@H](c2cc1OC)Cc1c(C3)c(OC)c(cc1)OC	TCMSP690	AEQDJSLRWYMAQI-KRWDZBQOSA-N	#N/A	#N/A	0.030577	1
MAPT	72344	MAPT	COc1cc(ccc1OC)c1cc(=O)c2c(o1)c(OC)c(c(c2OC)OC)OC	UNPD118756	MRIAQLRQZPPODS-UHFFFAOYSA-N	#N/A	#N/A	0.00886804	1
LMNA	72605	LMNA	CC(c1ccc(c(=O)c(c1)O)O)C	UNPD179297	HVGNSPLLPQWYGC-UHFFFAOYSA-N	#N/A	#N/A	0.0005379	1
NOS3	73238	NOS3	Nc1sc(c(n1)C)C	UNPD72587	XMXLBDNVSIHRRA-UHFFFAOYSA-N	#N/A	#N/A	0.147768	1
HPGD	74469	HPGD	COc1ccc(c(c1)CC(=O)O)OC	UNPD44216	BBZDYQUXRFATHZ-UHFFFAOYSA-N	#N/A	#N/A	0.0156642	1
MAPT	96539	MAPT	COc1ccc(cc1)c1cc(=O)c2c(o1)c(OC)c(c(c2O)OC)OC	UNPD114784	LXEVSYZNYDZSOB-UHFFFAOYSA-N	#N/A	#N/A	0.0106441	1
HPGD	96695	HPGD	OC(=O)c1cnc2c(n1)cccc2	UNPD75863	UPUZGXILYFKSGE-UHFFFAOYSA-N	#N/A	#N/A	0.0156928	1
HPGD	97141	HPGD	COc1ccc(cc1)c1oc2ccccc2c(=O)c1O	UNPD70879	IIBBFGMVMNZMGA-UHFFFAOYSA-N	#N/A	#N/A	0.011547	1
ESR2	99649	ESR2	OC[C@H]1O[C@@H](Oc2cc(O)cc3c2C(=O)c2c(C3=O)cc(cc2O)C)[C@@H]([C@H]([C@@H]1O)O)O	TCMTW18339	HSWIRQIYASIOBE-JNHRPPPUSA-N	#N/A	#N/A	0.115415	1
MAPT	110737	MAPT	O=C1CC2CC(C(C1)N2C)O	UNPD108	UOHSTKWPZWFYTF-UHFFFAOYSA-N	#N/A	#N/A	0.0135274	1
AKR1B10	114776	AKR1B10	OC[C@H]1O[C@H]([C@@H]([C@H]([C@@H]1O)O)O)c1c(O)cc2c(c1O)c(=O)cc(o2)c1ccc(c(c1)O)O	TCMTW19273	ODBRNZZJSYPIDI-VJXVFPJBSA-N	#N/A	#N/A	0.0358668	1
GALR3	124016	GALR3	Oc1cc(O)c2c(c1)O[C@@H]([C@@H]([C@H]2c1c(O)cc(c2c1O[C@@H]([C@@H](C2)OC(=O)c1cc(O)c(c(c1)O)O)c1ccc(c(c1)O)O)O)OC(=O)c1cc(O)c(c(c1)O)O)c1ccc(c(c1)O)O	ATCMD17837	KTLUHRSHFRODPS-RIQPQZJCSA-N	#N/A	#N/A	0.0902201	1
AKR1B10	124021	AKR1B10	OC[C@H]1O[C@@H](OC(=O)c2cc(O)c(c(c2)O)O)[C@@H]([C@H]([C@@H]1O)O)O	TCMTW30786	GDVRUDXLQBVIKP-HQHREHCSSA-N	#N/A	#N/A	0.0358711	1
PIK3CG	132904	PIK3CG	Oc1ccc(c2c1C(=O)c1c(C2)coc1C)O	UNPD16102	TZUYDLKHNQUNKS-UHFFFAOYSA-N	#N/A	#N/A	0.0103352	1
HSD17B10	157672	HSD17B10	CN1CCC[C@@H]1c1cccnc1	TCMSP2954	SNICXCGAKADSCV-SNVBAGLBSA-N	#N/A	#N/A	0.00792593	1
HTR2C	158365	HTR2C	O=C1[C@H](Cc2ccccc2)NC(=O)[C@H]2N1C1Nc3c([C@]1(C2)[C@]12C[C@@H]4N([C@H]1Nc1c2cccc1)C(=O)[C@@H](NC4=O)Cc1ccccc1)cccc3	UNPD218175	ZEANERNKMXBETI-BJHDJDSNSA-N	#N/A	#N/A	0.00028502	1
LMNA	159596	LMNA	CCCC[C@@H](C(=O)N[C@@H](C(C)(C)C)C(=O)N(C)C)CN(C=O)O	TCMID2421	AVDLWYHBABSSHC-CHWSQXEVSA-N	DB04368	experimental	0.000319126	1
CA9	167093	CA9	CCCCCCCCC(=O)c1ccc(cc1)O	UNPD78841	JZBXYOOARNRUME-UHFFFAOYSA-N	#N/A	#N/A	0.0242382	1
MAPT	167963	MAPT	CC(=CCCC1(C)C=Cc2c(O1)c(C)cc1c2[nH]c2c1cccc2)C	UNPD106187	HTNVFUBCWIYPJN-UHFFFAOYSA-N	#N/A	#N/A	0.0137279	1
HPGD	179503	HPGD	COc1ccc2c(c1)oc(=O)c(c2C)Cl	UNPD198979	AEMKPSYXSVLTAJ-UHFFFAOYSA-N	#N/A	#N/A	0.015653	1
PTPN1	181498	PTPN1	O=C1O[C@H](C(C)C)C2=CC3[C@@H]4[C@](C2=C1)(C)CCC[C@]4(C)C(=O)O3	TCMTW52236	DYJDPNXKUMPXEJ-DZLVSBGCSA-N	#N/A	#N/A	0.000421063	1
PTGS2	185848	PTGS2	Oc1cc(O)cc(c1)c1oc2c(c1)ccc(c2)O	UNPD12793	LHPRYOJTASOZGJ-UHFFFAOYSA-N	#N/A	#N/A	0.0150803	1
CES1	219592	CES1	Oc1ccc(c(c1)O)C(=O)C(=O)c1ccc(cc1O)O	UNPD176037	NGWYJYHAFLMHNW-UHFFFAOYSA-N	#N/A	#N/A	0.147497	1
ALOX5	229015	ALOX5	Oc1cccc(c1)c1cc(=O)c2c(o1)cccc2	UNPD28984	ISZWRZGKEWQACU-UHFFFAOYSA-N	#N/A	#N/A	0.0189845	1
TPPP	234105	TPPP	COc1c(OC)cc2c(c1OC)c1ccc(c(=O)cc1[C@H](CC2)NC(=O)C)O	ATCMD3900	PRGILOMAMBLWNG-HNNXBMFYSA-N	#N/A	#N/A	0.136758	1
TRPA1	256519	TRPA1	COc1c(CCC(=O)O)c2OC(C)(C)C=Cc2c2c1C=CC(O2)(C)C	UNPD104341	KSLHMLXPQDTMJX-UHFFFAOYSA-N	#N/A	#N/A	0.0150016	1
DRD1	261619	DRD1	COc1ccc2c(c1O)CN1C(C2)c2cc3OCOc3cc2CC1	UNPD112397	PQECCKIOFCWGRJ-UHFFFAOYSA-N	#N/A	#N/A	0.0322822	1
PTPN1	299645	PTPN1	COC(=O)C12OCC34C2C(OC(=O)C=C(C)C)C(=O)OC4CC2C(C3C(C1O)O)(C)CC(=O)C(=C2C)O	UNPD89796	ZZZYHIMVKOHVIH-UHFFFAOYSA-N	#N/A	#N/A	0.000358468	1
RBBP4	318797	RBBP4	OCC1(C)CCCc2c1ccc1c2C(=O)C(=O)c2c1occ2C	UNPD76113	XDUXBBDRILEIEZ-UHFFFAOYSA-N	#N/A	#N/A	0.069556	1
PTPN1	319648	PTPN1	O=c1oc(C(C)C)c2c(c1)C1(C)C3OC3C(C3(C1C(C2O)OC3=O)C)O	UNPD24064	DGNOPGIIPQKNHD-UHFFFAOYSA-N	#N/A	#N/A	0.000409757	1
NPC1	331783	NPC1	COc1ccc(cc1)[C@]12Oc3c([C@]2(O)[C@@H]([C@@H]([C@H]1c1ccccc1)C(=O)N(C)C)O)c(OC)cc(c3)OC	ATCMD18819	DAPAQENNNINUPW-IDAMAFBJSA-N	#N/A	#N/A	0.0177052	1
AKR1B10	339231	AKR1B10	Brc1cc(Oc2c(O)c(Br)c(c(c2Br)Br)Br)c(c(c1)Br)O	UNPD67510	OMYZFHYKAPRFFQ-UHFFFAOYSA-N	#N/A	#N/A	0.0120457	1
MAPT	344049	MAPT	O=C1OCC(=C1c1ccccc1)c1ccccc1	UNPD226551	CPBAHTZRJQATEJ-UHFFFAOYSA-N	#N/A	#N/A	0.0137773	1
ADORA2B	348130	ADORA2B	COc1cc2OC(CC(=O)c2c(c1)O)c1ccc(cc1)O	UNPD162908	DJOJDHGQRNZXQQ-UHFFFAOYSA-N	#N/A	#N/A	0.00881027	1
MAPT	375148	MAPT	CC(=CCCC1(C)C=Cc2c(O1)ccc1c2[nH]c2c1cc(c(c2)O)C)C	UNPD141807	WWXYBSVWYPHUPZ-UHFFFAOYSA-N	#N/A	#N/A	0.0137326	1
AKR1B10	375713	AKR1B10	O=Cc1c(O)c(OC)c(c2c1c(O)c(c(c2)C)c1c(C)cc2c(c1O)c(C=O)c(c(c2C(C)C)OC)O)C(C)C	UNPD84929	OUHOXIPLBJIWEG-UHFFFAOYSA-N	#N/A	#N/A	0.035795	1
LMNA	393601	LMNA	COc1ccc(cc1)[C@]12Oc3c([C@]2(O)[C@@H]([C@@H]([C@H]1c1ccccc1)C(=O)OC)O)c(OC)cc(c3)OC	ATCMD14668	VFTGDXPPYSWBSO-GWNOIRNCSA-N	#N/A	#N/A	0.000387921	1
PTPN1	441796	PTPN1	CC[C@@](C(=O)OC1C(=O)O[C@H]2[C@]34C1[C@@H](C)[C@@H](O)[C@@]([C@@H]4[C@@]1([C@@H](C2)C(=CC(=O)[C@H]1O)C)C)(OC3)O)(O)C	TCMTW50184	WRBGCYVAJRRQKP-STDAJNJZSA-N	#N/A	#N/A	0.000348286	1
CASP1	442113	CASP1	CNC(=O)Oc1ccc2c(c1)[C@]1(C)CCO[C@@H]1N2C	ATCMD17196	LXTKNVLLWOLCOV-JSGCOSHPSA-N	#N/A	#N/A	0.00649329	1
PLA2G2A	442153	PLA2G2A	CC(=CCc1cc(cc(c1O)CC=C(C)C)[C@@H]1CC(=O)c2c(O1)cc(cc2O)O)C	ATCMD53	LQHKFMYWTKORCE-QFIPXVFZSA-N	#N/A	#N/A	0.0513868	1
TRPA1	442638	TRPA1	N#CC(c1ccc(cc1)O)N1CCCCC1	UNPD188246	HNFAREZIVBKEJQ-UHFFFAOYSA-N	#N/A	#N/A	0.0150136	1
LMNA	442972	LMNA	O[C@H]1CC[C@]2(C(=CC[C@@H]3[C@@H]2CC2=C(C)[C@]4(CC[C@@H]32)O[C@H]2[C@H]([C@H]4C)NC[C@H](C2)C)C1)C	TCMTW48994	QASFUMOKHFSJGL-LAFRSMQTSA-N	#N/A	#N/A	0.000395541	1
MAPT	444266	MAPT	OC(=O)/C=C\C(=O)O	UNPD160907	VZCYOOQTPOCHFL-UPHRSURJSA-N	DB04299	experimental	0.00898367	1
PPARD	445580	PPARD	CC/C=C\C/C=C\C/C=C\C/C=C\C/C=C\C/C=C\CCC(=O)O	UNPD193293	MBMBGCFOFBJSGT-KUBAVDMBSA-N	#N/A	#N/A	0.0581796	1
DRD1	453215	DRD1	COc1cc2CCN3C(c2cc1OC)Cc1c(C3)c(O)c(cc1)OC	UNPD182048	DKBYSDUFSXFXMP-UHFFFAOYSA-N	#N/A	#N/A	0.0323308	1
LMNA	454740	LMNA	OCc1ccc(s1)c1ccc(s1)c1cccs1	UNPD550	WAYZWWNNJZMQCQ-UHFFFAOYSA-N	#N/A	#N/A	0.000906026	1
HKDC1	457825	HKDC1	COc1c(OC)cc2c3c1Oc1cc4c(cc1OC)CCN([C@H]4Cc1ccc(Oc4cc(C[C@H]3N(CC2)C)ccc4OC)cc1)C	ATCMD11699	WVTKBKWTSCPRNU-XZWHSSHBSA-N	#N/A	#N/A	0.0208327	1
NOD2	471002	NOD2	O=C(C[C@H](C(=O)O)C)CC([C@H]1C[C@@H]([C@@]2([C@]1(C)CC(=O)C1=C2[C@@H](O)C[C@@H]2[C@]1(C)CCC(=O)C2(C)C)C)O)C	TCMTW18556	DYOKDAQBNHPJFD-JNTBEZBXSA-N	#N/A	#N/A	0.0375747	1
NOD2	471008	NOD2	OCC(=CCCC([C@H]1CC[C@@]2([C@]1(C)CC=C1C2=CC[C@@H]2[C@]1(C)CCC(=O)C2(C)C)C)C)CO	ATCMD8165	JVGJXXNUVVQEIG-MCKXIFHVSA-N	#N/A	#N/A	0.0375911	1
MAPT	574211	MAPT	CC1CC2CCC(O2)C(C)C(=O)OC(C)CC2CCC(O2)C(C)C(=O)OC(CC2OC(C(C(=O)OC(CC3OC(C(C(=O)O1)C)CC3)C)C)CC2)C	UNPD153073	RMIXHJPMNBXMBU-UHFFFAOYSA-N	#N/A	#N/A	0.0135925	1
FASN	636928	FASN	CC(=CCc1cc(/C=C/c2cc(O)cc(c2)O)ccc1O)C	UNPD178901	BWCJJGGZRYKPID-SNAWJCMRSA-N	#N/A	#N/A	0.0132696	1
ALOX15	643392	ALOX15	COc1c(Br)cc(cc1C(=O)O)Br	UNPD102134	GDGFGZWIQSUSAX-UHFFFAOYSA-N	#N/A	#N/A	0.0161365	1
MAPT	661451	MAPT	CC(=O)OC1N=C(c2ccccc2)c2c(NC1=O)cccc2	UNPD74848	XDQDVCJNJFUBLE-UHFFFAOYSA-N	#N/A	#N/A	0.0136458	1
MAPT	688662	MAPT	Oc1cccc(c1)c1cc(=O)c2c(o1)ccc(c2)O	UNPD51464	YHLLABKHTFWHSZ-UHFFFAOYSA-N	#N/A	#N/A	0.012657	1
TRPA1	697993	TRPA1	Sc1nc2c(s1)cccc2	UNPD187359	YXIWHUQXZSMYRE-UHFFFAOYSA-N	#N/A	#N/A	0.0152712	1
MAPT	1549040	MAPT	C/C=C\c1ccc(cc1)OC	UNPD113759	RUVINXPYWBROJD-ARJAWSKDSA-N	#N/A	#N/A	0.00802849	1
LMNA	1549111	LMNA	OC(=O)/C=C\c1ccc(c(c1)O)O	UNPD52427	QAIPRVGONGVQAS-RQOWECAXSA-N	#N/A	#N/A	0.0107043	1
HPGD	1715307	HPGD	COc1cc(OC)c2c(c1)oc(=O)c(c2OC)c1ccc2c(c1)OCO2	UNPD50834	PZYZNVLXKYMURF-UHFFFAOYSA-N	#N/A	#N/A	0.00911659	1
TSHR	2794718	TSHR	OC(=O)CCn1cncc1	UNPD57432	VSFNAZLYGOOSEY-UHFFFAOYSA-N	#N/A	#N/A	0.000527112	1
GALR3	3002104	GALR3	O=C1OC2COC(=O)c3cc(O)c(c(c3c3c(C(=O)OC2C2OC(=O)c4c(c5c1cc(O)c(c5O)O)c(O)c(O)c(c4c1c4C(=O)OC2[C@H](O)c4c(c(c1O)O)O)O)cc(O)c(c3O)O)O)O	ATCMD3288	UDYKDZHZAKSYCO-LSSWMSPRSA-N	#N/A	#N/A	0.0902317	1
MAPT	3035211	MAPT	CSC(=S)NCc1c[nH]c2c1cccc2	UNPD131859	QYKQWFZDEDFELK-UHFFFAOYSA-N	#N/A	#N/A	0.0135339	1
FNTB	3037595	FNTB	CCCCCCCCCCCCCC/C(=C(/C(=O)O)\C)/C(=O)O	UNPD29268	ULSDRNDLXFVDED-MSUUIHNZSA-N	#N/A	#N/A	0.0654275	1
HPGD	3246477	HPGD	Oc1cc(O)c2c(c1)O[C@@H]([C@H]([C@@H]2c1c(O)cc(c2c1O[C@H]([C@@H](C2)O)c1ccc(c(c1)O)O)O)O)c1ccc(c(c1)O)O	TCMID7975	XFZJEEAOWLFHDH-LEZVGZISSA-N	#N/A	#N/A	0.0140845	1
MAPT	3279840	MAPT	COc1ccc(cc1)c1coc2c(c1=O)c(OC)cc(c2OC)OC	UNPD192087	KCISFICQVCMQEX-UHFFFAOYSA-N	#N/A	#N/A	0.0139486	1
ACP1	3653077	ACP1	O=Cc1c(O)c2CC(Cc2c2c1CC(O)OC2=O)(C)C	UNPD148867	BDEDPKFUFGCVCJ-UHFFFAOYSA-N	#N/A	#N/A	0.0670267	1
HKDC1	3940691	HKDC1	CCOC(=O)c1c(C)cc(c(c1O)C=O)O	UNPD35536	HUXJGSHUVDWZAM-UHFFFAOYSA-N	#N/A	#N/A	0.020894	1
TRPA1	4649699	TRPA1	COc1cc(OC)c2c(c1)C(=O)c1c(C2=O)c(OC)cc(c1)OC	UNPD1008	VFFWENDDWFNSFL-UHFFFAOYSA-N	#N/A	#N/A	0.0149615	1
HKDC1	4677798	HKDC1	CCC(C(=O)OC1CC(C)C=C2C1C(CCC1CC(O)CC(=O)O1)C(C=C2)C)(C)C	UNPD99864	RYMZZMVNJRMUDD-UHFFFAOYSA-N	#N/A	#N/A	0.0208428	1
TRPA1	5245507	TRPA1	NCCP(=O)(O)O	UNPD66406	QQVDJLLNRSOCEL-UHFFFAOYSA-N	#N/A	#N/A	0.015036	1
AKR1B10	5280459	AKR1B10	Oc1cc(O)c2c(c1)oc(c(c2=O)O[C@@H]1O[C@@H](C)[C@@H]([C@H]([C@H]1O)O)O)c1ccc(c(c1)O)O	TCMID8867	OXGUCUVFOIWWQJ-HQBVPOQASA-N	#N/A	#N/A	0.0358769	1
NOD1	5280704	NOD1	OC[C@H]1O[C@@H](Oc2cc(O)c3c(c2)oc(cc3=O)c2ccc(cc2)O)[C@@H]([C@H]([C@@H]1O)O)O	TCMTW18982	KMOUJOKENFFTPU-QNDFHXLGSA-N	#N/A	#N/A	0.0375434	1
HMGCR	5280723	HMGCR	CCCCC[C@@H](/C=C/[C@H]1[C@H](O)CC(=O)[C@@H]1CCCCCCC(=O)O)O	ATCMD17895	GMVPRGQOIOIIMI-DWKJAMRDSA-N	#N/A	#N/A	0.000466194	1
GPR18	5280795	GPR18	CC(CCCC(C1CCC2C1(C)CCCC2=CC=C1CC(O)CCC1=C)C)C	HIT032	QYSXJUFSXHHAJI-YRZJJWOYSA-N	DB00169	approved; nutraceutical	0.0336793	1
CHRNB2	5280960	CHRNB2	Oc1ccc(cc1)/C=C/C(=O)c1c(O)cc(cc1O)O	UNPD62967	YQHMWTPYORBCMF-ZZXKWVIFSA-N	#N/A	#N/A	0.0184234	1
TRPA1	5281365	TRPA1	OC/C=C(/CC/C=C(/CC/C=C(/CCC=C(C)C)\C)\C)\C	UNPD120289	OJISWRZIEWCUBN-QIRCYJPOSA-N	#N/A	#N/A	0.0150503	1
NPC1	5281431	NPC1	O=C(C(=C)C)O[C@@H]1C[C@@]2(C)OC(=CC2=O)C(=C[C@@H]2[C@@H]1C(=C)C(=O)O2)C	ATCMD2941	RYBHZNMPMHOBAR-IRNKKCRZSA-N	#N/A	#N/A	0.0176832	1
MAPT	5281646	MAPT	C=CC(c1c2OC(C)(C)C=Cc2c(c2c1oc1c(O)c(O)ccc1c2=O)O)(C)C	UNPD130797	XRVLGJCHUWXTDX-UHFFFAOYSA-N	#N/A	#N/A	0.013747	1
CASP1	5281671	CASP1	CC(=CCc1c(oc2c(c1=O)c(O)cc1c2C=CC(O1)(C)C)c1ccc(cc1O)O)C	UNPD32909	XFFOMNJIDRDDLQ-UHFFFAOYSA-N	#N/A	#N/A	0.00647968	1
AHR	5281695	AHR	COc1ccc(cc1)c1oc2cc(O)c(c(c2c(=O)c1OC)O)OC	UNPD117892	DWZAJFZEYZIHPO-UHFFFAOYSA-N	#N/A	#N/A	0.0598408	1
AKR1B10	5281702	AKR1B10	COc1cc(cc(c1O)OC)c1cc(=O)c2c(o1)cc(cc2O)O	UNPD63101	HRGUSFBJBOKSML-UHFFFAOYSA-N	#N/A	#N/A	0.0358103	1
UGT1A10	5281779	UGT1A10	Oc1ccc(cc1)c1coc2c(c1=O)c(O)c1c(c2)OCO1	UNPD111965	NUGRQNBDTZWXTP-UHFFFAOYSA-N	#N/A	#N/A	0.0366752	1
RAB9A	5281954	RAB9A	COc1cc(O)c2c(c1)oc(cc2=O)c1ccccc1	UNPD115243	IRZVHDLBAYNPCT-UHFFFAOYSA-N	#N/A	#N/A	0.0125082	1
NR3C1	5282362	NR3C1	Oc1ccc(cc1)C(=O)/C=C/c1ccccc1	UNPD32480	UAHGNXFYLAJDIN-IZZDOVSWSA-N	#N/A	#N/A	0.0208833	1
HMGCR	5283056	HMGCR	CCCCC[C@H](/C=C/[C@H]1[C@H](O)CC(=O)[C@@H]1CCCCCCC(=O)O)O	TCMID2355	GMVPRGQOIOIIMI-CHCORRSHSA-N	#N/A	#N/A	0.000466194	1
CNR1	5283381	CNR1	CCCCCCCC/C=C/CCCCCCCC=O	UNPD198993	ZENZJGDPWWLORF-MDZDMXLPSA-N	#N/A	#N/A	0.0307844	1
HPGD	5317564	HPGD	C/C(=C\COc1c2occc2cc2c1oc(=O)cc2)/CCC=C(C)C	UNPD118105	SOVNCTNQAWWYAQ-OQLLNIDSSA-N	#N/A	#N/A	0.0113803	1
NOX4	5318214	NOX4	COc1cc(O)c2c(c1)oc(cc2=O)c1ccc(c(c1)O)O	UNPD183208	RRRSSAVLTCVNIQ-UHFFFAOYSA-N	#N/A	#N/A	0.0798714	1
AKR1B10	5318591	AKR1B10	OC[C@H]1O[C@@H](Oc2ccc(cc2)/C=C/C(=O)c2ccc(cc2O)O)[C@@H]([C@H]([C@@H]1O)O)O	TCMID7686	YNWXJFQOCHMPCK-LXGDFETPSA-N	#N/A	#N/A	0.0358594	1
MAPK10	5320287	MAPK10	COc1cc(O)c2c(c1)oc(c(c2=O)O)c1ccc(c(c1)O)OC	UNPD17113	BWORNNDZQGOKBY-UHFFFAOYSA-N	#N/A	#N/A	0.0379277	1
CNR1	5320618	CNR1	O=C(N1CCCCC1)/C=C/CCc1ccc2c(c1)OCO2	UNPD112606	QHWOFMXDKFORMO-XVNBXDOJSA-N	#N/A	#N/A	0.0307379	1
CNR1	5320621	CNR1	CC(CNC(=O)/C=C/C=C/c1ccc2c(c1)OCO2)C	UNPD141179	WHAAPCGHVWVUEX-GGWOSOGESA-N	#N/A	#N/A	0.0310664	1
RBBP4	5321620	RBBP4	O[C@H]1CCc2c([C@@]1(C)O)ccc1c2C(=O)C(=O)c2c1occ2C	ATCMD20607	RTKDBIDPGKCZJS-KPZWWZAWSA-N	#N/A	#N/A	0.0695912	1
MAPT	5353639	MAPT	CC(=CCc1c2OC34C5(C/C=C(\C(=O)O)/C)OC(C4CC(C5=O)C=C3C(=O)c2c(c2c1OC(C)(CCC=C(C)C)C=C2)O)(C)C)C	UNPD169862	GEZHEQNLKAOMCA-XKZIYDEJSA-N	#N/A	#N/A	0.0112388	1
TSHR	5370625	TSHR	OC(=O)C/C=C/c1ccccc1	UNPD139113	PSCXFXNEYIHJST-QPJJXVBHSA-N	#N/A	#N/A	0.00055514	1
MAPT	5371085	MAPT	COC(=O)/C=C/c1c[nH]cn1	UNPD143967	ZXKOENSQFURTSZ-NSCUHMNNSA-N	#N/A	#N/A	0.0137714	1
DRD1	5377817	DRD1	COc1ccc(cc1)/C=C/C(=O)c1ccc(cc1)OC	UNPD68614	HDXVSZWKIHQDES-LFYBBSHMSA-N	#N/A	#N/A	0.0314413	1
NOD2	5464078	NOD2	CC(=CCc1c(O)cc2c(c1O)c(=O)c1c(o2)cc(c(c1CC=C(C)C)O)O)C	UNPD192914	VEZXFTKZUMARDU-UHFFFAOYSA-N	#N/A	#N/A	0.0123977	1
GAPDH	5466139	GAPDH	Oc1ccc(cc1)c1coc2c(c1=O)ccc(c2O)O	UNPD107203	BMZFZTMWBCFKSS-UHFFFAOYSA-N	#N/A	#N/A	0.0236314	1
DRD1	5467477	DRD1	Oc1ccc(cc1)/C=C/C(=O)c1ccc(cc1)O	UNPD158705	FZQLEXXZAVVCCA-XCVCLJGOSA-N	#N/A	#N/A	0.0314196	1
TRPA1	5467708	TRPA1	O=Cc1ccc(cc1)NC1CC(=O)OC1/C=C/C(O)C	UNPD140365	RYJWSNUDETVRFF-FARCUNLSSA-N	#N/A	#N/A	0.0150351	1
AKR1C2	5472440	AKR1C2	CC(=CCc1cc(/C=C/C(=O)O)cc(c1O)CC=C(C)C)C	UNPD46483	KABCFARPAMSXCC-JXMROGBWSA-N	#N/A	#N/A	0.0343716	1
SLC5A2	5481958	SLC5A2	CC(=CCc1c(oc2c(c1=O)c(O)cc(c2CC=C(C)C)O)c1ccc(cc1O)O)C	UNPD43386	UWQYBLOHTQWSQD-UHFFFAOYSA-N	#N/A	#N/A	0.00594568	1
CASP1	5481968	CASP1	Oc1ccc(c(c1)O)c1oc2c3C=CC(Oc3cc(c2c(=O)c1CCC(O)(C)C)O)(C)C	UNPD166205	AFOKZNPZDXHDHD-UHFFFAOYSA-N	#N/A	#N/A	0.00647968	1
CASP1	5481969	CASP1	CC(=CC1Oc2cc(O)ccc2c2c1c(=O)c1c(o2)c2C=CC(Oc2cc1O)(C)C)C	UNPD183593	GDQXJMLXEYSICD-UHFFFAOYSA-N	#N/A	#N/A	0.00648154	1
CASP1	5481973	CASP1	Oc1ccc2c(c1)OC(Cc1c2oc2c3C=CC(Oc3cc(c2c1=O)O)(C)C)C(O)(C)C	UNPD93944	BKIVBOLDWRIFMA-UHFFFAOYSA-N	#N/A	#N/A	0.00648317	1
CTSL	5487772	CTSL	COc1c(OC)cc(c2c1n(C)c1c(c2=O)cccc1O)O	UNPD41595	UTEAJHNFBCLZHN-UHFFFAOYSA-N	#N/A	#N/A	0.0483638	1
TRPA1	5709436	TRPA1	COc1cc(/C=C/C(=O)c2ccccc2O)cc(c1OC)OC	UNPD73760	SRSBUHVXNLHWHU-CMDGGOBGSA-N	#N/A	#N/A	0.015003	1
HPGD	5771622	HPGD	OC(=O)/C=C\C=C/c1ccc2c(c1)OCO2	UNPD70235	RHBGITBPARBDPH-CCAGOZQPSA-N	#N/A	#N/A	0.0156702	1
MAPK1	5810067	MAPK1	CC(=CCc1c(O)cc2c(c1O)c(=O)c(co2)c1ccc2c(c1)OCO2)C	UNPD37253	FTBGFGQPUMCUSC-UHFFFAOYSA-N	#N/A	#N/A	0.00726917	1
CNR1	6440803	CNR1	C/C=C/c1ccc(c(c1)c1cc(/C=C/C)ccc1O)O	UNPD100606	VLRNWUFGTCSJDO-GGWOSOGESA-N	#N/A	#N/A	0.107271	1
CNR1	6450018	CNR1	COc1cc(/C=C/C(=O)N2CCCCC2)ccc1O	UNPD70110	HSNHZGKSAZOEPE-SOFGYWHQSA-N	#N/A	#N/A	0.0307129	1
PDXK	6479877	PDXK	CCCCCCCC/C=C\c1c(C)c(/C=C\CCCCCCCC)c2[n+](c1C)CCC2	UNPD23474	LOTZSYKJMYSNJV-IKJQKJQYSA-N	#N/A	#N/A	0.0011439	1
HSD17B10	6602103	HSD17B10	OC1O[C@H](C(=O)O)[C@H]([C@H]([C@H]1O)O)O	ATCMD8741	AEMOLEFTQBMNLQ-PKKLWIBTSA-N	#N/A	#N/A	0.0111955	1
HPGD	6992288	HPGD	COc1cc2c(cc1OC)C[C@H]1c3c2c(O)c(OC)cc3CCN1C	ATCMD21185	SAERKXUSZPTMCQ-AWEZNQCLSA-N	#N/A	#N/A	0.00962444	1
HPGD	9570073	HPGD	c1coc(c1)C(/N=C/c1ccco1)/N=C/c1ccco1	UNPD207586	CYGDSXFTXXFMNI-OTYYAQKOSA-N	#N/A	#N/A	0.0157066	1
PTPN1	9801811	PTPN1	CC[C@@H](C(C)C)CCC([C@H]1CC[C@@H]2[C@]1(C)CC[C@H]1[C@H]2CC=C2[C@]1(C)CCC(=O)C2)C	TCMTW21258	KYOFIJXMVNQYFC-XJZKHKOHSA-N	#N/A	#N/A	0.000486455	1
MAPT	9810725	MAPT	COc1cc(OC(=O)c2c(C)cc(c(c2O)C)OC(=O)c2c(C)c(C)c(c(c2O)Cl)OC(=O)C2(O)C(=CC(=O)C(=C2OC)C)C)c(c(c1C(=O)O)C)C	UNPD130699	AFEAZMLLVJMACB-UHFFFAOYSA-N	#N/A	#N/A	0.000427527	1
TTR	9862886	TTR	CCCCC/C=C\C/C=C\C/C=C\C=C\C(CCCC(=O)O)O	UNPD24401	KGIJOOYOSFUGPC-XTDASVJISA-N	#N/A	#N/A	0.00612469	1
XBP1	9884262	XBP1	Oc1cc(O)c2c(c1)C(=O)c1c(C2=O)c2oc(C)cc(=O)c2c(c1)O	UNPD194162	AWDAPFGGFWZKGB-UHFFFAOYSA-N	#N/A	#N/A	0.0610957	1
VDR	9909368	VDR	O=C1O[C@@H]2[C@@](C1C)(O)[C@@]13[C@]4(C2)[C@H](OC3=O)C[C@H]([C@@]24C(O1)OC(=O)[C@@H]2O)C(C)(C)C	TCMTW50142	FPUXKXIZEIDQKW-VKMVSBOZSA-N	DB06743	nutraceutical	0.0469133	1
AKR1C2	9947201	AKR1C2	O=C(Oc1ccc(cc1CC=C(C)C)/C=C/C(=O)O)CCc1ccccc1	UNPD80434	BJIVLGIZOMJQRT-GXDHUFHOSA-N	#N/A	#N/A	0.0343797	1
TSHR	9951814	TSHR	COc1c(OC)cc(nc1c1csc(n1)CCCCCC(O)C)C(=O)O	UNPD104359	RGHLFUKUTGFTCO-UHFFFAOYSA-N	#N/A	#N/A	0.000676271	1
HSD17B10	9986835	HSD17B10	Brc1ccc(c(c1)Br)Oc1c(O)c(Br)c(c(c1Br)Br)Br	UNPD56610	LDMKXEGTHGJWLG-UHFFFAOYSA-N	#N/A	#N/A	0.0120784	1
CTSL	9998312	CTSL	COc1c(O)c(CC=C(C)C)c(c2c1n(C)c1c(c2=O)cccc1O)O	UNPD154791	GKBPFZFFEMNSRA-UHFFFAOYSA-N	#N/A	#N/A	0.0483641	1
CTSL	10016895	CTSL	COc1c(O)cc(c2c1n(C)c1c(c2=O)cccc1O)O	UNPD84442	QEGXAAUCDUFHPJ-UHFFFAOYSA-N	#N/A	#N/A	0.0483645	1
PREP	10093198	PREP	COC(=O)c1oc2c(c1c1c(oc3c1cc(O)c(c3)O)C(=O)OC)cc(c(c2)O)O	UNPD148696	IVZFDKACPFMQDJ-UHFFFAOYSA-N	#N/A	#N/A	0.109939	1
FASN	10095474	FASN	Oc1cc(O)cc(c1)[C@H]1c2cc(/C=C/c3cc(O)cc(c3)O)ccc2O[C@@H]1c1ccc(cc1)O	ATCMD18584	LILPTCHQLRKZNG-LPGNHZEISA-N	#N/A	#N/A	0.0132268	1
NOD2	10098048	NOD2	O=C(CC(C(=O)O)C)CC([C@H]1CC(=O)[C@@]2([C@]1(C)CC(=O)C1=C2[C@@H](O)C[C@@H]2[C@]1(C)CC[C@@H](C2(C)C)O)C)C	ATCMD8131	LWPLEHFGBRFRKI-BBFKVXDGSA-N	#N/A	#N/A	0.0375667	1
DAO	10149024	DAO	O=Cc1ccc(cc1O)C(C)C	UNPD196251	NSLDZVUVKUIYNL-UHFFFAOYSA-N	#N/A	#N/A	0.0576726	1
LMNA	10168886	LMNA	CCCCCCCCCCCCCCCc1cc(OC2OC(C(=O)O)C(C(C2O)O)O)cc(c1C(=O)Oc1cc(C)c(c(c1)O)C(=O)O)O	UNPD150298	PNRVAHOSWLWYPO-UHFFFAOYSA-N	#N/A	#N/A	0.000393552	1
LMNA	10169010	LMNA	CCCCCCCCCCCCCCCc1cc(OC2OC(C(=O)OC)C(C(C2O)O)O)cc(c1C(=O)Oc1cc(C)c(c(c1)O)C(=O)O)O	UNPD140099	STVGNKQOIYIMAK-UHFFFAOYSA-N	#N/A	#N/A	0.000379473	1
CASP1	10342292	CASP1	C/C(=C\Cc1cc(c(cc1O)O)C1CC(=O)c2c(O1)cc(cc2O)O)/CCC=C(C)C	UNPD17297	GJFHZVPRFLHEBR-VIZOYTHASA-N	#N/A	#N/A	0.00648067	1
HSD17B10	10348509	HSD17B10	Brc1cc(Oc2c(Br)cc(c(c2O)Br)Br)c(c(c1)Br)O	UNPD86867	OBMWDTFRQJRRIM-UHFFFAOYSA-N	#N/A	#N/A	0.0121358	1
MAPT	10370367	MAPT	COc1cc(OC(=O)c2c(C)cc(c(c2O)C)O)c(c(c1C(=O)Oc1c(C)c(C)c(c(c1C)OC)C(=O)O)C)C	UNPD81195	GMGUUHJTCVMSIG-UHFFFAOYSA-N	#N/A	#N/A	0.000578772	1
LMNA	10376483	LMNA	CC(c1ncc([nH]c1=O)Cc1ccccc1)C	UNPD183195	CZUORGWXUVRUMV-UHFFFAOYSA-N	#N/A	#N/A	0.000545573	1
CTSL	10385901	CTSL	CC(=CCc1c(O)cc2c(c1O)c(=O)c1c(n2C)c(O)ccc1CC=C(C)C)C	UNPD1273	DYCRIHPNHAPQTH-UHFFFAOYSA-N	#N/A	#N/A	0.0483732	1
CASP3	10409180	CASP3	C/C(=C\Cc1c(O)ccc(c1O)C(=O)/C=C/c1ccc(cc1)O)/CCC(C(=C)C)O	UNPD125795	NCHZAFAGBAEJJJ-BAYITLGHSA-N	#N/A	#N/A	0.0501539	1
PRKD1	10417809	PRKD1	O[C@@H]1COC(=O)c2cc(O)c(c(c2c2c(C(=O)O[C@H]1[C@@H]1OC(=O)c3cc(O)c(c(c3c3c4C(=O)O[C@H]1[C@@H](O)c4c(O)c(c3O)O)O)O)cc(O)c(c2O)O)O)O	TCMSP9100	CHBITXAMNKHJCR-VGYCLGPVSA-N	#N/A	#N/A	0.0455798	1
PLA2G2A	10435114	PLA2G2A	CC(=CCc1c(O)cc2c(c1O)C(=O)CC(O2)c1cc(CC=C(C)C)c(c(c1)CC=C(C)C)O)C	UNPD141553	DEOQQHCFRLUMMX-UHFFFAOYSA-N	#N/A	#N/A	0.0513845	1
NFKB1	10643491	NFKB1	CC(=CCc1c(O)c(CC=C(C)C)c2c(c1O)c(=O)c1c(o2)ccc(c1)O)C	UNPD113614	CBJCQKZZWUEEQY-UHFFFAOYSA-N	#N/A	#N/A	0.0479425	1
TSHR	10687292	TSHR	CCCCCCCC(=O)c1c(O)cc(cc1CC(=O)OCC)O	UNPD13449	UVVWQQKSNZLUQA-UHFFFAOYSA-N	#N/A	#N/A	0.000461675	1
FASN	10746383	FASN	OC[C@H]1O[C@@H](Oc2cc(O)cc(c2)[C@@H]2[C@H](Oc3c2cc(/C=C/c2cc(O)cc(c2)O)cc3)c2ccc(cc2)O)[C@@H]([C@H]([C@@H]1O)O)O	ATCMD18585	ZJIBDVBTKQSZQZ-REZQOROLSA-N	#N/A	#N/A	0.0131544	1
HSD17B10	11093078	HSD17B10	Brc1ccc(c(c1)Br)Oc1c(O)c(Br)cc(c1Br)Br	UNPD167334	FAGFPLJEMPQMRV-UHFFFAOYSA-N	#N/A	#N/A	0.0120992	1
GALE	11113600	GALE	CCOC(=O)NCCSSCCNC(=O)/C(=N/O)/Cc1ccc(c(c1)Br)O	UNPD105362	PSFMBZXVOPCKLJ-DEDYPNTBSA-N	#N/A	#N/A	0.0362279	1
DRD2	11186895	DRD2	COc1c(OC)ccc2c1CN1CCc3c([C@@H]1C2)cc(c(c3)O)OC	ATCMD4111	BMCZTYDZHNTKPR-INIZCTEOSA-N	#N/A	#N/A	0.0507792	1
MAPT	11253808	MAPT	O=C1c2cccc(c2C(=O)c2c1ccc(c2O)C)O	UNPD164909	OGURMTXRUQGVMS-UHFFFAOYSA-N	#N/A	#N/A	0.0143561	1
DRD2	11282465	DRD2	COc1cc2CCN3[C@H](c2cc1OC)Cc1c(C3)c(O)c(cc1)OC	TCMTW21019	DKBYSDUFSXFXMP-INIZCTEOSA-N	#N/A	#N/A	0.0507729	1
CASP1	11403114	CASP1	CNC(=O)Oc1ccc2c(c1)[C@]1(C)CCN(C1N2C)C	TCMID10188	PIJVFDBKTWXHHD-WUJWULDRSA-N	#N/A	#N/A	0.00649245	1
NR1H2	11419367	NR1H2	CC(=C)C(CCC([C@H]1CC[C@@]2([C@]1(C)CC[C@@]13[C@H]2CC[C@@H]2[C@]3(C1)CC[C@@H](C2(C)C)O)C)C)O	ATCMD4461	MHGLNDDJLDJDBG-GSYFYXRESA-N	#N/A	#N/A	0.137667	1
CTSL	11580650	CTSL	CC(=CCc1c(O)cc(c2c1n(C)c1c(O)cccc1c2=O)O)C	UNPD58827	OPPJKACRWCPJGU-UHFFFAOYSA-N	#N/A	#N/A	0.0483786	1
MAPT	11588031	MAPT	Oc1c(O)c2oc(=O)c3c4c2c(c1O)c(=O)oc4c(c(c3O)O)O	UNPD35555	JKULOEQBHREGAP-UHFFFAOYSA-N	#N/A	#N/A	0.000601283	1
PRKD1	11766372	PRKD1	O=C(c1cc(O)c(c(c1)O)O)O[C@@H]1[C@@H](OC(=O)c2cc(O)c(c(c2)O)O)C(O[C@H]2[C@H]1OC(=O)c1cc(O)c(c(c1c1c(C(=O)OC2)cc(c(c1O)O)O)O)O)OC(=O)c1cc(O)c(c(c1)O)O	TCMID8026	JCGHAEBIBSEQAD-WZASNERQSA-N	#N/A	#N/A	0.0455851	1
THPO	11957300	THPO	COc1cc2CCN[C@H](c2cc1O)Cc1ccc(cc1)Oc1cc(ccc1O)C[C@@H]1NCCc2c1cc(O)c(c2)OC	TCMID1003	DUBVXSGAOWUPMY-NSOVKSMOSA-N	#N/A	#N/A	0.0253935	1
DRD2	12304090	DRD2	COc1c(OC)ccc2c1CN1CCc3c([C@H]1C2)cc(c(c3)O)OC	TCMTW48857	BMCZTYDZHNTKPR-MRXNPFEDSA-N	#N/A	#N/A	0.0507792	1
DRD2	12313091	DRD2	COc1ccc2c(c1O)CN1[C@@H](C2)c2cc3OCOc3cc2CC1	ATCMD15197	PQECCKIOFCWGRJ-HNNXBMFYSA-N	#N/A	#N/A	0.0305505	1
DRD2	12442999	DRD2	COc1cc2CCN3[C@@H](c2cc1O)Cc1c(C3)c(OC)c(cc1)O	TCMTW53675	JKPISQIIWUONPB-OAHLLOKOSA-N	#N/A	#N/A	0.0507837	1
ERN1	12928010	ERN1	COc1c(O)cc(cc1Br)C(=O)O	UNPD38974	XKPMZMJYQDNWDG-UHFFFAOYSA-N	#N/A	#N/A	0.000534065	1
GANAB	13137289	GANAB	OCC1(O)CC(N)C(C(C1O)O)O	UNPD33001	VDLOJRUTNRJDJO-UHFFFAOYSA-N	#N/A	#N/A	0.0496212	1
CA9	13235410	CA9	Oc1ccc2c(c1)oc(=O)c(c2)C	UNPD117499	ZLQJVGSVJRBUNL-UHFFFAOYSA-N	#N/A	#N/A	0.0243966	1
PTPN1	13858192	PTPN1	CC(=O)O[C@H]1CC[C@]2([C@H](C1(C)C)CCC(=C)[C@@H]2CC/C(=C/C(=O)O)/C)C	UNPD212041	OMNJRQNCWHCCBZ-BULWIKRESA-N	#N/A	#N/A	0.000401485	1
HMGCR	13939278	HMGCR	CC(CC(=O)OCCC#Cc1ccc(s1)c1ccc(s1)COC(=O)CC(C)C)C	UNPD177423	KWTCTHJCQNSERL-UHFFFAOYSA-N	#N/A	#N/A	0.000806905	1
HSD11B2	13994830	HSD11B2	OC[C@@]1(O)C[C@@]23C[C@@H]1CC[C@H]3[C@]1([C@H](CC2)[C@@](C)(CCC1)C(=O)O)C	ATCMD5918	MRBLTWPEPGRXQN-PEVZUJSLSA-N	#N/A	#N/A	0.058072	1
NOD1	14109406	NOD1	O=C(CC(C(=O)O)C)CC([C@H]1CC(=O)[C@@]2([C@]1(C)CC(=O)C1=C2[C@@H](O)C[C@@H]2[C@]1(C)CCC(=O)C2(C)C)C)C	ATCMD8132	YTVGSCZIHGRVAV-IYAQLQCNSA-N	#N/A	#N/A	0.037573	1
LMNA	14235547	LMNA	CSCCC(C(=O)N)NC(=O)C(NC(=O)C(Cc1nc[nH]c1)NC(=O)CNC(=O)C(C(C)C)NC(=O)C(NC(=O)C(Cc1c[nH]c2c1cccc2)NC(=O)C(NC(=O)C1CCC(=O)N1)CCC(=O)N)C)Cc1ccccc1	UNPD147536	OHCNRADJYUSTIV-UHFFFAOYSA-N	#N/A	#N/A	0.000336018	1
HSD11B2	14314585	HSD11B2	COC(=O)[C@@]12CC[C@H]([C@@]([C@H]2C2=CC[C@H]3[C@@]([C@@]2(CC1)C)(C)CC[C@@H]1[C@]3(C)C[C@H]([C@@H](C1(C)C)O)O)(C)O)C	ATCMD14719	RQWXHGLRDYGNGZ-BPKREVGBSA-N	#N/A	#N/A	0.0580379	1
CASP1	14539882	CASP1	COc1cc(O)c(cc1C/C=C(/CCC=C(C)C)\C)C1CC(=O)c2c(O1)cc(cc2O)O	UNPD94680	CZVSHXUUSIQWSO-LZYBPNLTSA-N	#N/A	#N/A	0.00648036	1
RBBP4	14610613	RBBP4	COC(=O)[C@@]1(C)CCCc2c1ccc1c2C(=O)C(=O)c2c1occ2C	TCMTW52013	YFDKIHAZVQFLRC-FQEVSTJZSA-N	#N/A	#N/A	0.0694954	1
NPC1	14807487	NPC1	C/C=C(/C(=O)O[C@@H]1C[C@@]2(C)OC(=CC2=O)C(=C[C@@H]2[C@@H]1C(=C)C(=O)O2)CO)\C	TCMID10635	BMVJFNLJSZHNNS-BVPXTQGSSA-N	#N/A	#N/A	0.0176864	1
TYR	20144841	TYR	OC(=O)c1ccccc1	UNPD51284	WPYMKLBDIGXBTP-UHFFFAOYSA-N	DB03793	approved	0.0291961	1
GALE	21581855	GALE	O/N=C(/C(=O)NCCSSCCNC(=O)OC)\Cc1ccc(c(c1)Br)O	UNPD36794	QBAGBBYBQAYFBT-XDHOZWIPSA-N	#N/A	#N/A	0.0362531	1
HSD11B2	21672621	HSD11B2	COC(=O)[C@@]12CC[C@H]([C@@H]([C@H]2C2=CC[C@H]3[C@@]([C@@]2(CC1)C)(C)CC[C@@H]1[C@]3(C)C[C@H]([C@H](C1(C)C)O)O)C)C	ATCMD14262	BRZWXKGDPAZBLF-ZLSCOBDWSA-N	#N/A	#N/A	0.0580453	1
MAPK1	21952380	MAPK1	OC(=O)CCC(=O)O	UNPD142464	KDYFGRWQOYBRFD-UHFFFAOYSA-N	DB00139	approved; nutraceutical	0.0131307	1
NOD1	23247895	NOD1	O=C(CC(C(=O)O)C)CC(C1CC(=O)C2(C1(C)C(OC(=O)C)C(=O)C1=C2C(=O)CC2C1(C)CCC(=O)C2(C)C)C)C	HIT008	BWCNWXLKMWWVBT-AIMUVTGPSA-N	#N/A	#N/A	0.0375648	1
MAPT	23786459	MAPT	C=C1CCC(C)C(C)(CC=CC=C1C(=O)O)CCC1=CCOC1=O	UNPD157384	ONFWNHLCKGVKGW-JCFRVBNTSA-N	#N/A	#N/A	0.0136287	1
DAO	24849532	DAO	Oc1ccc(c(c1)O)CCc1ccc(cc1O)O	UNPD66505	WKIFTWPZTZUMRN-UHFFFAOYSA-N	#N/A	#N/A	0.0576636	1
HMGCR	25014552	HMGCR	CC#CC#Cc1ccc(s1)C#CC(CO)O	UNPD113129	MZCFHXFKOQBSQU-UHFFFAOYSA-N	#N/A	#N/A	0.00123282	1
TSHR	25110755	TSHR	NC(=N)NCC/C=C(\C(=O)O)/CC(=O)O	UNPD45980	FQUBLGQMXQHASY-DJWKRKHSSA-N	#N/A	#N/A	0.000519577	1
UGT2B7	26196040	UGT2B7	COc1c(C/C=C(/[C@H](CC(=O)O)O)\C)c(O)c2c(c1C)COC2=O	UNPD220294	OGJCZLOIKMTMKF-GXWOQWCDSA-N	#N/A	#N/A	0.038237	1
PLK4	44518236	PLK4	C[C@H]1C/C=C/[C@H]2OC(O[C@H]2CC/C=C/c2c(C(=O)O1)c(O)cc(c2)O)(C)C	UNPD220729	RATBTQWBKSYHAA-KBNFMYKHSA-N	#N/A	#N/A	0.0563838	1
CASP1	53242257	CASP1	COc1cc(O)c(cc1C/C=C(/CCC=C(C)C)\C)c1cc(=O)c2c(o1)cc(cc2O)O	UNPD204452	QGNFPYTXEYXYEC-LZYBPNLTSA-N	#N/A	#N/A	0.00648972	1
CTSL	53316985	CTSL	COc1c(O)c(CC=C(C)C)c(c2c1n(C)c1c(c2=O)c(CC=C(C)C)ccc1O)O	UNPD169530	LICNIJQEAUQKSD-UHFFFAOYSA-N	#N/A	#N/A	0.0483635	1
CTSL	53318269	CTSL	COc1c(O)c2CC(O)C(Oc2c2c1n(C)c1c(c2=O)cccc1O)(C)C	UNPD185707	QAUFACGSJSABOB-UHFFFAOYSA-N	#N/A	#N/A	0.0483546	1
CTSL	53326179	CTSL	COc1c2OC(Cc2c(c2c1n(C)c1c(c2=O)cccc1O)O)C(O)(C)C	UNPD166994	QHLDPWBFSQRVLN-UHFFFAOYSA-N	#N/A	#N/A	0.0483546	1
TRPA1	54680871	TRPA1	O=c1cc(O)c2c([nH]1)cccc2	UNPD107433	HDHQZCHIXUUSMK-UHFFFAOYSA-N	#N/A	#N/A	0.0150849	1
HKDC1	54683839	HKDC1	COc1c2C=CC(Oc2c(c2c1c(O)c(c1ccc(cc1)O)c(=O)o2)CC=C(C)C)(C)C	UNPD124610	QKTFIWUHGFCLHF-UHFFFAOYSA-N	#N/A	#N/A	0.0208502	1
LMNA	57379439	LMNA	OC[C@@H](C(=O)N[C@H]([C@@H](CC(=O)N[C@H](C(=O)NCC(=O)N([C@@H](C(=O)N1CCC[C@H]1C(=O)OC)Cc1ccccc1)C)C(C)C)O)CC(C)C)NC(=O)[C@H](Cc1ccc(cc1)O)NC(=O)[C@@H](C(C)C)OC(=O)[C@@H]([C@@H](CC)C)N(C)C	UNPD222750	NDLHEZRABDBDPY-YQLRASQXSA-N	#N/A	#N/A	0.00033288	1
NOD1	57396771	NOD1	O=C(C[C@H](C(=O)O)C)CC([C@H]1C[C@@H]([C@@]2([C@]1(C)CC(=O)C1=C2[C@@H](O)C[C@@H]2[C@]1(C)CC[C@@H](C2(C)C)O)C)O)C	ATCMD8147	RERVSJVGWKIGTJ-RQLZKMEDSA-N	#N/A	#N/A	0.0375641	1
MAPT	59658623	MAPT	OC(=O)C(=C)OP(=O)(O)O	UNPD137757	DTBNBXWJWCWCIK-UHFFFAOYSA-N	DB01819	experimental	0.000477574	1
MAPT	60168275	MAPT	O=C(Cc1ccc(c(c1)O)O)OCCc1ccc(c(c1)O)O	UNPD228519	DXMUHVKMWHWKJE-UHFFFAOYSA-N	#N/A	#N/A	0.000492198	1
UGT2B7	70693788	UGT2B7	OC[C@H]1O[C@H](O[C@H](/C(=C/Cc2c(OC)c(C)c3c(c2O)C(=O)OC3)/C)CC(=O)O)[C@@H]([C@H]([C@@H]1O)O)O	UNPD218488	WYXRFIJAMXLLNA-YVWBRKQGSA-N	#N/A	#N/A	0.0382214	1
LMNA	70694527	LMNA	OC(=O)[C@H]1N[C@H](Cc2c[nH]cn2)c2c(C1)c1cc(O)ccc1[nH]2	UNPD210181	VXURZHPEJYLPGK-KGLIPLIRSA-N	#N/A	#N/A	0.000506442	1
DRD1	71524613	DRD1	COc1ccc2c(c1O)CN1[C@H](C2)c2cc3OCOc3cc2CC1	TCMTW52239	PQECCKIOFCWGRJ-OAHLLOKOSA-N	#N/A	#N/A	0.0322822	1
NPC1	73345320	NPC1	C/C=C(/C(=O)O[C@H]1CC(=C[C@@]2(O[C@H]([C@@H]3[C@@H]1C(=C)C(=O)O3)C(=C2)C)OC)C)\C	UNPD230729	AFBZZDSPQOILGX-HCIVKLMFSA-N	#N/A	#N/A	0.0176961	1
AKR1B10	76315831	AKR1B10	O=C(OC[C@@H]1O[C@H](Oc2c(oc3c(c2=O)c(O)cc(c3)O)c2ccc(c(c2)O)O)[C@H]([C@@H]([C@H]1O)O)O)/C=C/c1ccc(c(c1)O)O	TCMTW38391	IHBVMUCQCZEAPW-JFAIZOFHSA-N	#N/A	#N/A	0.0359459	1
LMNA	76335838	LMNA	OC(=O)[C@@H](Cc1ccc(c(c1)O)O)OC(=O)[C@H]1[C@H](C(=O)O[C@@H](C(=O)O)Cc2ccc(c(c2)O)O)[C@@H]([C@H]1c1ccc(c(c1)O)O)c1ccc(c(c1)O)O	UNPD215469	SUYLTDFWHNXGDX-DFPPRZEMSA-N	#N/A	#N/A	0.0003465	1
MAPT	91900057	MAPT	CO[C@@H](C(=O)N[C@H](C(=O)N[C@H]1[C@@H](C)OC(=O)[C@@H](NC(=O)[C@H](Cc2ccc(cc2)O)N(C)C(=O)[C@@H](N2C(=O)[C@@H](NC(=O)/C(=C/C)/NC1=O)CC[C@H]2O)Cc1ccccc1)C(C)C)C(C)C)COS(=O)(=O)[O-]	UNPD219397	PRNIFZKCOZWFQZ-RQMGCWJVSA-M	#N/A	#N/A	0.0137759	1
MAPT	91900060	MAPT	CO[C@@H](C(=O)N[C@H](C(=O)N[C@H]1[C@@H](C)OC(=O)[C@@H](NC(=O)[C@H](Cc2ccccc2)N(C)C(=O)[C@@H](N2C(=O)[C@@H](NC(=O)/C(=C/C)/NC1=O)CC[C@H]2O)Cc1ccccc1)C(C)C)C(C)C)COS(=O)(=O)[O-]	UNPD213122	PBMZXBNAVCUNPL-YMRUBDPHSA-M	#N/A	#N/A	0.0137671	1
MAPT	101593005	MAPT	COc1cc2c(cc1O)CC[n+]1c2cc2ccc(c(c2c1)OC)OC	UNPD45059	MXTLAHSTUOXGQF-UHFFFAOYSA-O	#N/A	#N/A	0.0103236	1
LMNA	51	LMNA	OC(=O)CCC(=O)C(=O)O	UNPD185510	KPGXRSRHYNQIFN-UHFFFAOYSA-N	#N/A	#N/A	0.0122456	1
FBP1	73	FBP1	OC1C(OP(=O)(O)O)C(OC1n1cnc2c1ncnc2N)COP(=O)(O)O	UNPD109426	WHTCPDAXWFLDIH-UHFFFAOYSA-N	#N/A	#N/A	0.0683943	1
HSD17B10	191	HSD17B10	OCC1OC(C(C1O)O)n1cnc2c1ncnc2N	UNPD128026	OIRDTQYFTABQOQ-UHFFFAOYSA-N	#N/A	#N/A	0.00803225	1
P2RY1	197	P2RY1	OC1C(COP(=O)(OP(=O)(O)O)O)OC(C1O)n1cnc2c1ncnc2N	UNPD106879	XTWYTFMLZFPYCI-UHFFFAOYSA-N	#N/A	#N/A	0.000808474	1
MAPT	408	MAPT	O=C1CCC(N1C)c1cccnc1	UNPD100642	UIKROCXWUNQSPJ-UHFFFAOYSA-N	#N/A	#N/A	0.00929282	1
HTR7	931	HTR7	c1ccc2c(c1)cccc2	UNPD141787	UFWIBTONFRDIAS-UHFFFAOYSA-N	#N/A	#N/A	0.0275166	1
ALOX12	1148	ALOX12	OC(=O)C(Cc1c[nH]c2c1cccc2)N	UNPD149555	QIVBCDIJIAJPQS-UHFFFAOYSA-N	#N/A	#N/A	0.0183813	1
USP2	1201	USP2	CCCc1cc(=O)oc2c1c1OC(C)(C)C=Cc1c1c2C(O)C(C(O1)C)C	UNPD113973	NIDRYBLTWYFCFV-UHFFFAOYSA-N	#N/A	#N/A	0.0107774	1
USP2	1245	USP2	COc1cc(ccc1O)C(C(=O)O)O	UNPD13656	CGQCWMIAEPEHNQ-UHFFFAOYSA-N	#N/A	#N/A	0.0107419	1
RELA	1663	RELA	NNCc1cccc(c1)O	TCMSP8594	OFKWWALNMPEOSZ-UHFFFAOYSA-N	#N/A	#N/A	0.0113647	1
HSD17B10	1738	HSD17B10	COc1cc(ccc1O)CC(=O)O	UNPD133661	QRMZSPFSDQBLIX-UHFFFAOYSA-N	#N/A	#N/A	0.00766155	1
RELA	1826	RELA	OC(=O)Cc1c[nH]c2c1cc(O)cc2	UNPD107400	DUUGKQCEGZLZNO-UHFFFAOYSA-N	#N/A	#N/A	0.00762518	1
RELA	2266	RELA	OC(=O)CCCCCCCC(=O)O	UNPD104030	BDJRBEYXGGNYIS-UHFFFAOYSA-N	DB00548	approved	0.00787121	1
TUBB2B	2336	TUBB2B	c1ccc2c(c1)c1ccc3c4c1c(c2)ccc4ccc3	UNPD139497	FMMWHPNWAFZXNH-UHFFFAOYSA-N	#N/A	#N/A	0.048032	1
TRPV1	2543	TRPV1	CCCCCc1cc(O)c2c(c1)OC(c1c2cc(C)cc1)(C)C	UNPD10795	VBGLYOIFKLUMQG-UHFFFAOYSA-N	#N/A	#N/A	0.0224765	1
CASP7	2597	CASP7	CNC1=C(Cl)C(=O)c2c(C1=O)cncc2	UNPD179369	YIDGULDOJYFHGX-UHFFFAOYSA-N	#N/A	#N/A	0.0181954	1
CASP7	2598	CASP7	OCCNC1=CC(=O)c2c(C1=O)cncc2	UNPD53444	JPUNXFPVVKDHNP-UHFFFAOYSA-N	#N/A	#N/A	0.0181019	1
OPRK1	2828	OPRK1	COc1ccc2c3c1OC1C43CCN(C(C2)C4C=CC1O)C	UNPD113335	OROGSEYTTFOCAN-UHFFFAOYSA-N	#N/A	#N/A	0.0566125	1
TRPV1	2978	TRPV1	CCCCCc1cc(O)c2c(c1)OC(C1C2C=C(C)CC1)(C)C	UNPD116779	CYQFCXCEBYINGO-UHFFFAOYSA-N	#N/A	#N/A	0.0224334	1
GDA	3134	GDA	CN(c1ncnc2c1nc[nH]2)C	UNPD129400	BVIAOQMSVZHOJM-UHFFFAOYSA-N	#N/A	#N/A	0.00230056	1
DRD1	5417	DRD1	COc1cc2CCN3C(c2cc1OC)Cc1c(C3)c(OC)c(cc1)OC	UNPD138041	AEQDJSLRWYMAQI-UHFFFAOYSA-N	#N/A	#N/A	0.0172406	1
MAPT	5585	MAPT	Cc1cc2c(o1)c(C)c1c(c2)c(C)cc(=O)o1	UNPD82719	FMHHVULEAZTJMA-UHFFFAOYSA-N	DB04571	approved	0.0112762	1
HSD17B10	5668	HSD17B10	COC(=O)C1(O)CC2(CC)CCCN3C2c2n1c1ccccc1c2CC3	UNPD155629	RXPRRQLKFXBCSJ-UHFFFAOYSA-N	#N/A	#N/A	0.0152364	1
HSD17B10	5699	HSD17B10	OC(=O)c1cc(=O)c2c([nH]1)c(O)ccc2	UNPD73011	FBZONXHGGPHHIY-UHFFFAOYSA-N	#N/A	#N/A	0.0153672	1
ADK	6029	ADK	OC[C@H]1O[C@H]([C@@H]([C@@H]1O)O)n1ccc(=O)[nH]c1=O	ATCMD22170	DRTQHJPVMGBUCF-XVFCMESISA-N	#N/A	#N/A	0.0668118	1
MAPT	6185	MAPT	O=C[C@@]12CC[C@@H](C[C@@]2(O)CC[C@@H]2[C@@H]1CC[C@]1([C@]2(O)CC[C@@H]1C1=CC(=O)OC1)C)O	ATCMD20324	ODJLBQGVINUMMR-HZXDTFASSA-N	#N/A	#N/A	0.0114612	1
CHRNA7	6380	CHRNA7	C[N+](C)(C)C	UNPD130234	QEMXHQIAXOOASZ-UHFFFAOYSA-N	DB03095	experimental	0.0443975	1
LMNA	6403	LMNA	CCC(C)(C)C	UNPD28321	HNRMPXKDFBEGFZ-UHFFFAOYSA-N	#N/A	#N/A	0.00751819	1
ESR1	6623	ESR1	CC(c1ccc(cc1)O)(c1ccc(cc1)O)C	UNPD73786	IISBACLAFKSPIT-UHFFFAOYSA-N	DB06973	experimental	0.0345315	1
ADRB1	6954	ADRB1	O=N(=O)c1cc(N(=O)=O)c(c(c1)N(=O)=O)O	UNPD178439	OXNIZHLAWKMVMX-UHFFFAOYSA-N	DB03651	experimental	0.0478041	1
HSD17B10	7017	HSD17B10	Oc1ccccc1c1ccccc1	UNPD84239	LLEMOWNGBBNAJR-UHFFFAOYSA-N	#N/A	#N/A	0.0166747	1
NCF1	7019	NCF1	Nc1c2ccccc2nc2c1cccc2	TCMSP3084	XJGFWWJLMVZSIG-UHFFFAOYSA-N	DB11561	experimental	0.0697835	1
ALOX15	7024	ALOX15	O=Cc1cc(Br)cc(c1O)Br	UNPD109871	JHZOXYGFQMROFJ-UHFFFAOYSA-N	#N/A	#N/A	0.00196735	1
PTGS2	7136	PTGS2	C=CCc1ccc(c(c1)OC)OC(=O)C	UNPD76489	SCCDQYPEOIRVGX-UHFFFAOYSA-N	#N/A	#N/A	0.0440087	1
HSD17B10	8397	HSD17B10	O=c1cnc2c([nH]1)c(=O)nc([nH]2)N	UNPD89767	VURKRJGMSKJIQX-UHFFFAOYSA-N	#N/A	#N/A	0.00874894	1
PTPN6	8400	PTPN6	OC(C(=O)c1ccccc1)c1ccccc1	UNPD60752	ISAOCJYIOMOJEB-UHFFFAOYSA-N	#N/A	#N/A	0.0276641	1
HSD17B10	8443	HSD17B10	CC(=O)Nc1ccccc1C	UNPD218393	BPEXTIMJLDWDTL-UHFFFAOYSA-N	#N/A	#N/A	0.0165744	1
HSD17B10	8640	HSD17B10	Nc1cccc2c1cccc2	UNPD83750	RUFPHBVGCFYCNW-UHFFFAOYSA-N	#N/A	#N/A	0.0166743	1
HSD17B10	8842	HSD17B10	OCCC(CCC=C(C)C)C	UNPD180310	QMVPMAAFGQKVCJ-UHFFFAOYSA-N	#N/A	#N/A	0.0120153	1
HSD17B10	8846	HSD17B10	CCCCOC(=O)C=C	TCMSP8608	CQEYYJKEWSMYFG-UHFFFAOYSA-N	#N/A	#N/A	0.0165551	1
HTT	8934	HTT	c1ccc(cc1)[B-](c1ccccc1)(c1ccccc1)c1ccccc1	UNPD66878	SVHQOIWIRUVWII-UHFFFAOYSA-N	#N/A	#N/A	0.0253191	1
ALOX12	9017	ALOX12	CC(CCC=C(C)C)CCOC(=O)C	UNPD140986	JOZKFWLRHCDGJA-UHFFFAOYSA-N	#N/A	#N/A	0.0183885	1
HSD17B10	9128	HSD17B10	c1ccc2c(c1)c1cccc3c1c1c2cccc1cc3	UNPD98607	TXVHTIQJNYSSKO-UHFFFAOYSA-N	#N/A	#N/A	0.0166677	1
TSHR	9426	TSHR	CCC1CN2CCc3c(C2CC1CC1NCCc2c1cc(OC)c(c2)OC)cc(c(c3)OC)OC	UNPD51575	AUVVAXYIELKVAI-UHFFFAOYSA-N	#N/A	#N/A	0.00760475	1
PCSK7	10138	PCSK7	O=C1C=C2CC3(C(=C2C=C1O)c1ccc(c(c1OC3)O)O)O	UNPD110723	HLUCICHZHWJHLL-UHFFFAOYSA-N	#N/A	#N/A	0.0245557	1
RAB9A	10206	RAB9A	COc1cc2CCN([C@H]3c2cc1Oc1c2c(CCN([C@H]2Cc2ccc(Oc4cc(C3)ccc4OC)cc2)C)cc2c1OCO2)C	ATCMD3404	YVPXVXANRNDGTA-WDYNHAJCSA-N	#N/A	#N/A	0.0239241	1
ALOX15	10253	ALOX15	OC(=O)CNC(=O)c1ccccc1O	UNPD173246	ONJSZLXSECQROL-UHFFFAOYSA-N	#N/A	#N/A	0.0145331	1
CA1	10269	CA1	COc1cc(c(c(c1)C(C)(C)C)O)C(C)(C)C	UNPD190938	SLUKQUGVTITNSY-UHFFFAOYSA-N	#N/A	#N/A	0.0556653	1
MIF	10364	MIF	CC(c1ccc(c(c1)O)C)C	UNPD189594	RECUKUPTGUEGMW-UHFFFAOYSA-N	#N/A	#N/A	0.0274237	1
ALOX12	10453	ALOX12	C=CC(CCCC(CCCC(CCCC(C)C)C)C)(O)C	UNPD147171	KEVYVLWNCKMXJX-UHFFFAOYSA-N	#N/A	#N/A	0.0183995	1
PCSK7	10800	PCSK7	O=N(=O)c1cc(C)c(c(c1)N(=O)=O)O	UNPD141168	ZXVONLUNISGICL-UHFFFAOYSA-N	#N/A	#N/A	0.0245485	1
MAOB	11305	MAOB	Oc1ccc(c2c1cccc2)O	UNPD83218	PCILLCXFKWDRMK-UHFFFAOYSA-N	#N/A	#N/A	0.0275775	1
PTPN6	11363	PTPN6	O=C(c1ccccc1)C(=O)C	UNPD58274	BVQVLAIMHVDZEL-UHFFFAOYSA-N	#N/A	#N/A	0.0279977	1
UGT1A1	12111	UGT1A1	Oc1ccc(cc1)Cc1ccc(cc1)O	UNPD57753	PXKLMJQFEQBVLD-UHFFFAOYSA-N	#N/A	#N/A	0.014889	1
DAO	12649	DAO	CC(c1ccc(=O)c(cc1)O)C	UNPD170324	WKEWHSLZDDZONF-UHFFFAOYSA-N	#N/A	#N/A	0.0577078	1
LMNA	12717	LMNA	O=CN(CC(=O)O)O	UNPD191275	URJHVPKUWOUENU-UHFFFAOYSA-N	DB02109	experimental	0.000468402	1
MT3	12835	MT3	OCCc1c[nH]c2c1cc(OC)cc2	UNPD186583	QLWKTGDEPLRFAT-UHFFFAOYSA-N	#N/A	#N/A	0.0448166	1
HPGD	13436	HPGD	c1ccc(cc1)SSc1ccccc1	UNPD29946	GUUVPOWQJOLRAS-UHFFFAOYSA-N	#N/A	#N/A	0.0101811	1
HPGD	14090	HPGD	O=CC(=O)c1ccccc1	UNPD134816	OJUGVDODNPJEEC-UHFFFAOYSA-N	#N/A	#N/A	0.0103441	1
HSD17B2	14982	HSD17B2	O[C@@H]1[C@@H](O[C@@H]2O[C@H](C(=O)O)[C@H]([C@@H]([C@H]2O)O)O)[C@H](O[C@@H]([C@H]1O)C(=O)O)O[C@H]1CC[C@]2([C@H](C1(C)C)CC[C@@]1([C@@H]2C(=O)C=C2[C@@]1(C)CC[C@@]1([C@H]2C[C@](C)(CC1)C(=O)O)C)C)C	TCMTW50268	LPLVUJXQOOQHMX-QWBHMCJMSA-N	#N/A	#N/A	0.0205059	1
KDM5C	15331	KDM5C	CN(NC(=O)CCC(=O)O)C	UNPD171084	NOQGZXFMHARMLW-UHFFFAOYSA-N	#N/A	#N/A	0.0622142	1
MAOA	15362	MAOA	CN1CCc2c(C1)cccc2	UNPD218084	KYXSVGVQGFPNRQ-UHFFFAOYSA-N	#N/A	#N/A	0.0281741	1
MIF	16590	MIF	C=CCSSCC=C	UNPD69987	PFRGXCVKLLPLIP-UHFFFAOYSA-N	#N/A	#N/A	0.020403	1
CHRNA7	29758	CHRNA7	CN1CCCCC1c1cccnc1	UNPD63577	WHAIHNKQZOMXJJ-UHFFFAOYSA-N	#N/A	#N/A	0.0444618	1
HTR1E	31116	HTR1E	O=C([C@H]1CN(C)[C@H]2C(=C1)c1cccc3c1c(C2)c[nH]3)N[C@@]1(O[C@@]2(N(C1=O)[C@@H](Cc1ccccc1)C(=O)N1[C@H]2CCC1)O)C(C)C	ATCMD7216	HEFIYUQVAZFDEE-MKTPKCENSA-N	#N/A	#N/A	0.00753188	1
CA1	31405	CA1	CC(c1cccc(c1O)C(C)(C)C)(C)C	TCMSP1651	DKCPKDPYUFEZCP-UHFFFAOYSA-N	#N/A	#N/A	0.055645	1
XDH	65084	XDH	Oc1cc2O[C@H](c3cc(O)c(c(c3)O)O)[C@H](Cc2c(c1)O)O	ATCMD8078	XMOCLSLCDHWDHP-SWLSCSKDSA-N	#N/A	#N/A	0.0262832	1
PIK3CG	65093	PIK3CG	c1ccc(nc1)SSc1ccccn1	UNPD31383	HAXFWIACAGNFHA-UHFFFAOYSA-N	#N/A	#N/A	0.013138	1
MAPT	68077	MAPT	COc1ccc(cc1)c1cc(=O)c2c(o1)c(OC)c(c(c2OC)OC)OC	UNPD127189	ULSUXBXHSYSGDT-UHFFFAOYSA-N	#N/A	#N/A	0.0120423	1
TSHR	68167	TSHR	CCCCCCCCC#CCCCCCCCC(=O)O	UNPD38698	RGTIBVZDHOMOKC-UHFFFAOYSA-N	#N/A	#N/A	0.000570358	1
HSD17B10	68296	HSD17B10	S=c1ccss1	UNPD141911	LZENMJMJWQSSNJ-UHFFFAOYSA-N	#N/A	#N/A	0.0119841	1
HSD17B10	68477	HSD17B10	CC(=CCc1c(O)cc2c(c1O)c(=O)cc(o2)C)C	UNPD96497	DTNGBIGBPPPNNB-UHFFFAOYSA-N	#N/A	#N/A	0.0166548	1
UGT1A1	68570	UGT1A1	Oc1ccc2c(c1)CC[C@@H]1[C@@H]2CC[C@]2([C@H]1CC[C@H]2O)C	ATCMD7365	VOXZDWNPVJITMN-SFFUCWETSA-N	#N/A	#N/A	0.0148081	1
MAOA	69988	MAOA	COc1cc(O)ccc1O	UNPD24989	LAQYHRQFABOIFD-UHFFFAOYSA-N	#N/A	#N/A	0.0282445	1
MAOB	71034	MAOB	COc1ccc2c(c1)c(=O)c1c(o2)cccc1	UNPD95969	DVZCOQQFPCMIPO-UHFFFAOYSA-N	#N/A	#N/A	0.0204752	1
ALDH2	72279	ALDH2	Oc1ccc2c(c1)c(=O)cc(o2)c1ccccc1	UNPD224486	GPZYYYGYCRFPBU-UHFFFAOYSA-N	#N/A	#N/A	0.0171836	1
NPC1	72725	NPC1	O=c1cc2oc3ccccc3nc2cc1N	UNPD125266	RDJXPXHQENRCNG-UHFFFAOYSA-N	#N/A	#N/A	0.0305696	1
SLCO2B1	73299	SLCO2B1	OC[C@]1(C)[C@@H](O)CC[C@]2([C@H]1CC[C@@]1([C@@H]2CC=C2[C@@]1(C)CC[C@@]1([C@H]2CC(CC1)(C)C)C(=O)O)C)C	ATCMD9234	PGOYMURMZNDHNS-MYPRUECHSA-N	#N/A	#N/A	0.0161571	1
MAOB	74708	MAOB	Oc1ccc2c(c1)c(=O)c1c(o2)cccc1	UNPD137051	WSACHQJPCNOREV-UHFFFAOYSA-N	#N/A	#N/A	0.0204614	1
UGT1A1	80152	UGT1A1	Oc1ccc(cc1)CCc1ccc(cc1)O	UNPD133067	URFNSYWAGGETFK-UHFFFAOYSA-N	#N/A	#N/A	0.0148414	1
UGT2B7	87894	UGT2B7	O=Cc1cn(c2c1cccc2)C	UNPD135251	KXYBYRKRRGSZCX-UHFFFAOYSA-N	#N/A	#N/A	0.0190831	1
MAPT	88881	MAPT	COc1cc(OC)c2c(c1)oc(cc2=O)c1ccccc1	UNPD34141	JRFZSUMZAUHNSL-UHFFFAOYSA-N	#N/A	#N/A	0.0078971	1
SLCO2B1	92095	SLCO2B1	C[C@H]1CC[C@@]2(OC1)OC1[C@H]([C@@H]2C)[C@@]2([C@@H](C1)[C@@H]1CC[C@H]3[C@]([C@H]1CC2)(C)CC[C@@H](C3)O)C	ATCMD19324	GMBQZIIUCVWOCD-WWASVFFGSA-N	#N/A	#N/A	0.0161575	1
HSD17B10	92201	HSD17B10	O=c1ccc2c(o1)c1C[C@H](Oc1cc2)C(O)(C)C	ATCMD3926	YRAQEMCYCSSHJG-NSHDSACASA-N	#N/A	#N/A	0.0165883	1
HSP90AB1	93039	HSP90AB1	OC[C@H]1O[C@@H](OC2OC=C[C@@H]3[C@H]2[C@@]2(CO)O[C@H]2[C@H]3OC(=O)c2ccc(cc2)O)[C@@H]([C@H]([C@@H]1O)O)O	TCMTW48506	UXSACQOOWZMGSE-RWORTQBESA-N	#N/A	#N/A	0.0391813	1
ADORA2B	96118	ADORA2B	COc1ccc(cc1)c1cc(=O)c2c(o1)cc(c(c2OC)OC)OC	UNPD27985	URSUMOWUGDXZHU-UHFFFAOYSA-N	#N/A	#N/A	0.0176146	1
SOAT2	96324	SOAT2	CSC1=CC(=O)c2c(C1=O)cccc2	UNPD178506	GGFFBRRZAKLGFX-UHFFFAOYSA-N	#N/A	#N/A	0.115394	1
MAPT	97332	MAPT	COc1cc(OC)c2c(c1)oc(c(c2=O)OC)c1ccc(c(c1)OC)OC	UNPD143350	ALGDHWVALRSLBT-UHFFFAOYSA-N	#N/A	#N/A	0.00815144	1
MAPT	99342	MAPT	CC1=CC(C)(C)Nc2c1cc(cc2)Cc1ccc2c(c1)C(=CC(N2)(C)C)C	UNPD165655	ADHZMOYUJKFKSE-UHFFFAOYSA-N	#N/A	#N/A	0.00816534	1
HSD17B10	99613	HSD17B10	Oc1cc(C)c(c(c1)O)C(=O)Oc1cc(C)c(c(c1)O)C(=O)O	UNPD38288	HEMSJKZDHNSSEW-UHFFFAOYSA-N	#N/A	#N/A	0.0166382	1
PSIP1	100058	PSIP1	OCC1OC(OC2OC=C(C3C2C(O)(CO)C=C3)C(=O)OC)C(C(C1O)O)O	UNPD107049	XJMPAUZQVRGFRE-UHFFFAOYSA-N	#N/A	#N/A	0.017377	1
UGT1A1	100801	UGT1A1	C=Cc1cc(O)cc2c1c1ccc(c(c1CC2)C)O	UNPD70465	GEXAPRXWKRZPCK-UHFFFAOYSA-N	#N/A	#N/A	0.0148236	1
HTR7	107838	HTR7	N1CCc2c(C1)[nH]c1c2cccc1	UNPD15683	CFTOTSJVQRFXOF-UHFFFAOYSA-N	#N/A	#N/A	0.0440839	1
HPGD	108104	HPGD	COc1cc2ccc(=O)oc2c2c1occ2	UNPD161473	DLCJNIBLOSKIQW-UHFFFAOYSA-N	#N/A	#N/A	0.00809287	1
MAPT	108130	MAPT	COc1cc2CC(C)C(C)Cc3c(c2c(c1OC)OC)c(OC)c1c(c3)OCO1	UNPD114572	RTZKSTLPRTWFEV-UHFFFAOYSA-N	#N/A	#N/A	0.00717095	1
MAPT	115244	MAPT	[O-]C(=O)[C@@H]1CCC[N+]1(C)C	ATCMD20181	CMUNUTVVOOHQPW-LURJTMIESA-N	#N/A	#N/A	0.0079705	1
ADORA2B	117900	ADORA2B	COc1cc(OC)c2c(c1)oc(c(c2=O)OC)c1ccccc1	UNPD102606	CBTHKWVPSIGKMI-UHFFFAOYSA-N	#N/A	#N/A	0.017616	1
MPEG1	124072	MPEG1	COc1cc(CCC(=O)CC(=O)CCc2ccc(c(c2)OC)O)ccc1O	UNPD142518	LBTVHXHERHESKG-UHFFFAOYSA-N	#N/A	#N/A	0.0384556	1
PTPN6	126072	PTPN6	O[C@@H]1CCc2c([C@@]1(C)O)ccc1c2C(=O)C(=O)c2c1occ2C	ATCMD20606	RTKDBIDPGKCZJS-KZULUSFZSA-N	#N/A	#N/A	0.0166256	1
ACHE	128950	ACHE	OC1CNc2c(C(=O)N1)[nH]cn2	UNPD32828	HCLYCONTUAROEE-UHFFFAOYSA-N	#N/A	#N/A	0.0222872	1
HTR2B	150885	HTR2B	CNCCc1c[nH]c2c1cc(O)cc2	UNPD11265	ASUSBMNYRHGZIG-UHFFFAOYSA-N	#N/A	#N/A	0.0448351	1
PTPN6	160142	PTPN6	CC(C1=Cc2ccc3c(c2C(=O)C1=O)CCCC3(C)C)C	UNPD10801	FEFAIBOZOKSLJR-UHFFFAOYSA-N	#N/A	#N/A	0.0278384	1
HTR2B	160463	HTR2B	NCCc1c[nH]c2c1ccc(c2)O	UNPD48906	WZTKTNRVJAMKAS-UHFFFAOYSA-N	#N/A	#N/A	0.0448188	1
ADRA1B	162883	ADRA1B	Brc1ccc2c(c1)c1ccncc1[nH]2	UNPD170964	DNUXGDOJLQYUTO-UHFFFAOYSA-N	#N/A	#N/A	0.00225971	1
AHR	164454	AHR	CN[C@@H]1C(=O)N[C@@H](C(C)C)C(=O)N[C@@H]([C@@](Oc2cc([C@H]1O)c(cc2O)S(=O)C[C@H](C[C@@H](C(=O)O)N)O)(C)CC)C(=O)NCC(=O)O	ATCMD22202	QRLBQXQEGMBXFM-MWFNQMQISA-N	#N/A	#N/A	0.0597989	1
CHRNB2	169017	CHRNB2	CO[C@H]1C=CC2=CCN3[C@]2(C1)c1cc(OC)c(cc1CC3)O	ATCMD7304	BDIVMECULLJBMU-KSSFIOAISA-N	#N/A	#N/A	0.0901752	1
PDE4B	176911	PDE4B	COc1cc(OC)c2c(c1CC=C(C)C)oc(=O)cc2	UNPD108608	CPXPWRXPEOMRNV-UHFFFAOYSA-N	#N/A	#N/A	0.0514292	1
ADORA2B	188323	ADORA2B	COc1cc2oc(cc(=O)c2c(c1OC)O)c1ccc(cc1)O	UNPD13561	ZIIAJIWLQUVGHB-UHFFFAOYSA-N	#N/A	#N/A	0.0176147	1
NPC1	200283	NPC1	O=C(n1ccc2c1cccc2)c1ccccc1	UNPD61161	DIQDUFVJZPNLJQ-UHFFFAOYSA-N	#N/A	#N/A	0.0281312	1
PSIP1	219402	PSIP1	O=CC(C1OC(=O)C(C1O)O)O	UNPD11624	UYUXSRADSPPKRZ-UHFFFAOYSA-N	#N/A	#N/A	0.0173452	1
TNKS2	229016	TNKS2	Oc1ccc(cc1)c1cc(=O)c2c(o1)cccc2	UNPD4266	SHGLJXBLXNNCTE-UHFFFAOYSA-N	#N/A	#N/A	0.0368856	1
MAPT	235279	MAPT	COc1ccc2c(c1)nc1c(n2)cccc1	UNPD15072	YGSXHEXJOFMTHZ-UHFFFAOYSA-N	#N/A	#N/A	0.00867903	1
EIF4G1	238795	EIF4G1	COC1=CC(=O)C(=C(C1=O)OC)OC	UNPD60901	OIMLWOWVDNEGEN-UHFFFAOYSA-N	#N/A	#N/A	0.0669483	1
HTR7	251561	HTR7	COC(=O)C1=COC(C2C1CC1N(C2)CCc2c1[nH]c1c2cccc1)C	UNPD140418	GRTOGORTSDXSFK-UHFFFAOYSA-N	#N/A	#N/A	0.0276125	1
PDE4B	290897	PDE4B	COc1cc2OC(C)(C)C=Cc2c2c1ccc(=O)o2	UNPD60824	ZNMRQYJUVCXNGK-UHFFFAOYSA-N	#N/A	#N/A	0.0514318	1
TSHR	348206	TSHR	OCC1OC(C(C1O)O)n1cnc2c1ncnc2N(C)C	UNPD146918	WVGPGNPCZPYCLK-UHFFFAOYSA-N	#N/A	#N/A	0.00624677	1
ALOX15	358832	ALOX15	COc1cc(ccc1OC)c1cc(=O)c2c(o1)c(OC)c(c(c2O)OC)OC	UNPD130395	DOFJNFPSMUCECH-UHFFFAOYSA-N	#N/A	#N/A	0.00894973	1
MPEG1	363127	MPEG1	O=C1OCc2c1c(c1ccc3c(c1)OCO3)c1c(c2)cc2c(c1)OCO2	UNPD127877	YMGOOHXUOWZQOE-UHFFFAOYSA-N	#N/A	#N/A	0.0383556	1
MPEG1	363128	MPEG1	O=C1OCc2c1cc1cc3OCOc3cc1c2c1ccc2c(c1)OCO2	UNPD174829	VSMWRDYVLPCABE-UHFFFAOYSA-N	#N/A	#N/A	0.0383556	1
PREP	382514	PREP	CC(=O)Oc1c2oc3c(c2c(c2c1c1cc(O)c(cc1o2)O)OC(=O)C)cc(c(c3)O)O	UNPD148931	CCNILPFRYYKQOP-UHFFFAOYSA-N	#N/A	#N/A	0.110105	1
OPRK1	408120	OPRK1	COC1=CC=C2C34C1Oc1c4c(CC2N(CC3)C)ccc1OC	UNPD119994	FQXXSQDCDRQNQE-UHFFFAOYSA-N	#N/A	#N/A	0.0565933	1
SLC2A1	441298	SLC2A1	CC(=CCCC1(C)C(CC=C(C)C)CC2(C(=O)C1(C(=O)C(C)C)C(=O)C(=C2O)CC=C(C)C)CC=C(C)C)C	HIT045	KGSZHKRKHXOAMG-HQKKAZOISA-N	#N/A	#N/A	0.0284132	1
NR1H3	441688	NR1H3	OC[C@H]1O[C@@H](Oc2cc(O)cc3c2cc(O[C@@H]2O[C@H](CO)[C@H]([C@@H]([C@H]2O)O)O)c([o+]3)c2ccc(c(c2)O)O)[C@@H]([C@H]([C@@H]1O)O)O	TCMTW48952	RDFLLVCQYHQOBU-ZOTFFYTFSA-O	#N/A	#N/A	0.132297	1
SLCO1B3	441764	SLCO1B3	OC[C@@H]1c2cc(cc(c2O[C@H]1c1ccc(c(c1)OC)O)O)[C@H]1Oc2cc(O)cc(c2C(=O)[C@@H]1O)O	TCMTW53507	BMLIIPOXVWESJG-LMBCONBSSA-N	#N/A	#N/A	0.0521821	1
MAOB	442186	MAOB	COc1cc2c(cc1OC)CCN([C@H]2C)C	ATCMD16690	HRSIPKSSEVRSPG-VIFPVBQESA-N	#N/A	#N/A	0.0204364	1
TNF	442813	TNF	OC[C@H]1O[C@@H](Oc2ccc3c(c2)occ(c3=O)c2ccc(cc2)OC)[C@@H]([C@H]([C@@H]1O)O)O	TCMTW18196	MGJLSBDCWOSMHL-MIUGBVLSSA-N	#N/A	#N/A	0.0139551	1
SLC6A4	442879	SLC6A4	O=C1OC[C@@H]([C@H]1Cc1ccc2c(c1)OCO2)Cc1ccc2c(c1)OCO2	ATCMD4299	DDWGQGZPYDSYEL-LSDHHAIUSA-N	#N/A	#N/A	0.0284212	1
PTGS2	443639	PTGS2	Oc1ccc(cc1)[C@H]1Oc2cc(O)cc(c2C[C@H]1O)O	ATCMD6804	RSYUFYQTACJFML-UKRRQHHQSA-N	#N/A	#N/A	0.043996	1
MAPT	443758	MAPT	Oc1cc2O[C@@H](c3ccc(c(c3)O)O)[C@H](C(=O)c2c(c1)O)O	TCMSP1503	CXQWRCVTCMQVQX-GJZGRUSLSA-N	#N/A	#N/A	0.00880394	1
GAA	444539	GAA	OC(=O)/C=C/c1ccccc1	UNPD161812	WBYWAXJHAXSJNI-VOTSOKGWSA-N	#N/A	#N/A	0.0372305	1
MAOA	445070	MAOA	OC/C=C(/CC/C=C(/CCC=C(C)C)\C)\C	UNPD51627	CRDAMVZIKSXKFV-YFVJMOTDSA-N	#N/A	#N/A	0.0280117	1
MPEG1	460888	MPEG1	COc1cc2c(cc1OC)cc1c(c2c2ccc3c(c2)OCO3)COC1=O	UNPD113637	TXDMVCNSUVLKHW-UHFFFAOYSA-N	#N/A	#N/A	0.0383589	1
SLCO2B1	467320	SLCO2B1	Oc1cc2O[C@@H]([C@@H](Cc2c(c1)O)OC(=O)c1cc(O)c(c(c1)O)O)c1cc(O)c(=O)c2c(c1)c(cc(c2O)O)[C@H]1Oc2cc(O)cc(c2C[C@H]1OC(=O)c1cc(O)c(c(c1)O)O)O	ATCMD21206	ZEASWHWETFMWCV-ISBUVJFSSA-N	#N/A	#N/A	0.016201	1
MAPT	479497	MAPT	CC(CC(=O)O[C@@H](C1=CC(=O)c2c(C1=O)c(O)ccc2O)CC=C(C)C)C	TCMSP3145	UTOUNDHZJFIVPK-QGZVFWFLSA-N	#N/A	#N/A	0.000434873	1
UGT1A1	480764	UGT1A1	CC(=CCc1c(O)cc(c2c1O[C@@H](CC2=O)c1ccc(cc1)O)O)C	ATCMD11212	LPEPZZAVFJPLNZ-SFHVURJKSA-N	#N/A	#N/A	0.00989928	1
UGT1A1	509245	UGT1A1	CC(=CCc1c(O)cc(c2c1OC(CC2=O)c1ccc(cc1)O)O)C	UNPD180221	LPEPZZAVFJPLNZ-UHFFFAOYSA-N	#N/A	#N/A	0.0148287	1
PTPN2	598522	PTPN2	O=C1C(=O)c2ccoc2c2c1cccc2	UNPD165327	HAUHEECDQLXVSA-UHFFFAOYSA-N	#N/A	#N/A	0.0630403	1
MAOB	611428	MAOB	Oc1cccc2c1oc1ccccc1c2=O	UNPD159887	KBQFPPUAIJHDCO-UHFFFAOYSA-N	#N/A	#N/A	0.0204614	1
NPC1	611672	NPC1	CC(=C)C1Cc2c(O1)cc1c(c2)ccc(=O)o1	UNPD11707	VMWUHWZFDITAOL-UHFFFAOYSA-N	#N/A	#N/A	0.0298245	1
PDE4B	618370	PDE4B	COc1cc2ccc(=O)oc2c2c1OC(C)(C)C=C2	UNPD178291	UOFNVZWWIXXTMZ-UHFFFAOYSA-N	#N/A	#N/A	0.05143	1
USP2	622180	USP2	COc1ccc2c(c1)c(=O)cc(n2C)c1ccccc1	UNPD49341	GFUAPSNFZWUMBP-UHFFFAOYSA-N	#N/A	#N/A	0.0107336	1
ALOX15	624785	ALOX15	COc1ccc2c(c1)OCc1c2oc2c1ccc(c2)OC	UNPD17467	FLEXCYTURSFUNC-UHFFFAOYSA-N	#N/A	#N/A	0.0117354	1
OPRK1	626667	OPRK1	COC1=CC=C2C34C1Oc1c4c(CC2N(CC3)C)ccc1O	UNPD13784	ZKLXUUYLEHCAMF-UHFFFAOYSA-N	#N/A	#N/A	0.0565932	1
ADORA2B	631095	ADORA2B	COc1ccc(cc1)c1oc2cc(OC)cc(c2c(=O)c1OC)OC	UNPD190265	YZWIIEJLESXODL-UHFFFAOYSA-N	#N/A	#N/A	0.0176183	1
ADORA2B	634113	ADORA2B	COc1cc(OC)c2c(c1)oc(c(c2=O)OC)c1cc(OC)c(c(c1)OC)OC	UNPD27386	CMRBCUQYNLDSKE-UHFFFAOYSA-N	#N/A	#N/A	0.0176142	1
ALOX12	636835	ALOX12	Brc1cc(O)c2c(c1)Oc1c(O2)cc(cc1Br)Br	UNPD86132	XZPITRJUKODSMI-UHFFFAOYSA-N	#N/A	#N/A	0.0197743	1
ESR1	637048	ESR1	Oc1ccc(cc1)c1coc2c(c1=O)c(O)c(c(c2C)O)C	UNPD22391	VSEIMGCATUFLSE-UHFFFAOYSA-N	#N/A	#N/A	0.125235	1
MIF	637511	MIF	O=C/C=C/c1ccccc1	UNPD152606	KJPRLNWUNMBNBZ-QPJJXVBHSA-N	#N/A	#N/A	0.0197529	1
MAPT	637566	MAPT	OC/C=C(/CCC=C(C)C)\C	UNPD171634	GLZPCOQZEFWAFX-JXMROGBWSA-N	#N/A	#N/A	0.0123487	1
MAPT	638015	MAPT	O=C/C=C(/C=C/C=C(/C=C/C1=C(C)CCCC1(C)C)\C)\C	UNPD145661	NCYCYZXNIZJOKI-OVSJKPMPSA-N	#N/A	#N/A	0.0106633	1
TRPV1	638026	TRPV1	CCCCCc1cc(O)c2c(c1)OC([C@H]1[C@H]2CC(=CC1)C)(C)C	ATCMD20984	HCAWPGARWVBULJ-IAGOWNOFSA-N	#N/A	#N/A	0.0224293	1
UGT1A1	640096	UGT1A1	Oc1ccc(cc1)CC(=O)c1ccc(cc1O)O	UNPD198719	KLFCJXAPIFIIFR-UHFFFAOYSA-N	#N/A	#N/A	0.0148425	1
HSD17B10	643764	HSD17B10	COc1cc(/C=C\C(=O)N2CCC=CC2=O)cc(c1OC)OC	UNPD37412	VABYUUZNAVQNPG-FPLPWBNLSA-N	#N/A	#N/A	0.00917353	1
MAOA	694735	MAOA	O=C(N1CCCC1)/C=C/c1ccc2c(c1)OCO2	UNPD84336	SXFYVDPKNPGHKJ-GQCTYLIASA-N	#N/A	#N/A	0.0280645	1
MAOA	736681	MAOA	CCOC(=O)/C=C/c1ccc(c(c1)OC)O	UNPD136180	ATJVZXXHKSYELS-FNORWQNLSA-N	#N/A	#N/A	0.0279995	1
MAPT	1548942	MAPT	COc1cc(CNC(=O)CCCC/C=C\C(C)C)ccc1O	UNPD70594	YKPUWZUDDOIDPM-VURMDHGXSA-N	DB09120	approved	0.00911683	1
PTGS2	1548943	PTGS2	COc1cc(CNC(=O)CCCC/C=C/C(C)C)ccc1O	UNPD13616	YKPUWZUDDOIDPM-SOFGYWHQSA-N	DB05318	investigational	0.0112164	1
ALOX15	1801510	ALOX15	COc1c(OC)c(OC)c(c2c1oc(cc2=O)c1c(O)cccc1O)O	UNPD191655	PPIOPQQHBZSDQX-UHFFFAOYSA-N	#N/A	#N/A	0.00769755	1
CHEK2	3085877	CHEK2	O=C1CCNC(=O)c2c1cc[nH]2	UNPD134772	AAPGLCCSVSGLFH-UHFFFAOYSA-N	#N/A	#N/A	0.0241272	1
MAPT	3270699	MAPT	CCC(C(=O)c1c(O)c(C)c2c(c1O)c1c(O)c(C(=O)C(CC)C)c(c(c1o2)C)O)C	UNPD75329	SGFCERQKVVMREN-UHFFFAOYSA-N	#N/A	#N/A	0.00989548	1
HPGD	3473650	HPGD	COc1c2C=CC(Oc2cc2c1c(=O)c(co2)c1ccc2c(c1)OCO2)(C)C	UNPD135547	OKBNMQXBQLZQEM-UHFFFAOYSA-N	#N/A	#N/A	0.00790375	1
HSD17B10	3938139	HSD17B10	COc1cc(O)c(cc1O)C(=O)c1ccccc1	UNPD61251	NFJVELXCUBWAFL-UHFFFAOYSA-N	#N/A	#N/A	0.0107105	1
OPRD1	3969708	OPRD1	COC(=O)C1CC(OC(=O)C)C(=O)C2C1(C)CCC1C2(C)CC(OC1=O)c1cocc1	UNPD30462	OBSYBRPAKCASQB-UHFFFAOYSA-N	#N/A	#N/A	0.0703727	1
MAPT	4587968	MAPT	COc1c2C=CC(Oc2ccc1c1coc2c(c1=O)cc1c(c2)OC(C(C1)O)(C)C)(C)C	UNPD185391	KJTDZAHLWHEULN-UHFFFAOYSA-N	#N/A	#N/A	0.0105839	1
PCSK7	4921319	PCSK7	O=N(=O)c1cc(N)c(c(c1)N(=O)=O)O	UNPD166506	QXYMVUZOGFVPGH-UHFFFAOYSA-N	#N/A	#N/A	0.0245473	1
OPRK1	5149725	OPRK1	COc1ccc2c3c1OC1C43CCN(C(C2)C4C=CC1=O)C	UNPD160649	XYYVYLMBEZUESM-UHFFFAOYSA-N	#N/A	#N/A	0.0565793	1
MAPK14	5280417	MAPK14	COc1cc(O)c2c(c1)oc(c(c2=O)OC)c1ccc(c(c1)O)O	UNPD59868	LUJAXSNNYBCFEE-UHFFFAOYSA-N	#N/A	#N/A	0.0131888	1
SLCO2B1	5280489	SLCO2B1	C/C(=C\C=C\C=C(\C=C\C=C(\C=C\C1=C(C)CCCC1(C)C)/C)/C)/C=C/C=C(/C=C/C1=C(C)CCCC1(C)C)\C	UNPD162512	OENHQHLEOONYIE-JLTXGRSLSA-N	#N/A	#N/A	0.0161457	1
PSIP1	5280862	PSIP1	COc1c(oc2c(c1=O)c(O)cc(c2)O)c1ccc(cc1)O	UNPD59371	VJJZJBUCDWKPLC-UHFFFAOYSA-N	#N/A	#N/A	0.0150193	1
OPRD1	5281148	OPRD1	CCCCCCC/C=C\[C@@H](C#CC#C[C@@H](C=C)O)O	ATCMD7688	QWCNQXNAFCBLLV-YWALDVPYSA-N	#N/A	#N/A	0.0704282	1
ERBB2	5281222	ERBB2	Oc1ccc(c(c1)O)C(=O)/C=C/c1ccc(c(c1)O)O	UNPD13913	AYMYWHCQALZEGT-ORCRQEGFSA-N	#N/A	#N/A	0.0197789	1
MAOB	5281661	MAOB	COc1cc(O)c2c(c1)oc1c(c2=O)c(O)c(cc1)O	UNPD17265	BDBVOZGRVBXANN-UHFFFAOYSA-N	#N/A	#N/A	0.0204232	1
AURKB	5281680	AURKB	Oc1ccc(cc1O)c1oc2cc(O)c(c(c2c(=O)c1O)O)O	UNPD29705	ZVOLCUVKHLEPEV-UHFFFAOYSA-N	#N/A	#N/A	0.0394708	1
HSD17B10	5281707	HSD17B10	Oc1ccc2c(c1)oc(=O)c1c2oc2c1ccc(c2)O	UNPD86256	ZZIALNLLNHEQPJ-UHFFFAOYSA-N	#N/A	#N/A	0.00809607	1
HPGD	5281764	HPGD	O=C(O[C@H]([C@H](C(=O)O)OC(=O)/C=C/c1ccc(c(c1)O)O)C(=O)O)/C=C/c1ccc(c(c1)O)O	UNPD211494	YDDGKXBLOXEEMN-IABMMNSOSA-N	#N/A	#N/A	0.0118386	1
HPGD	5281771	HPGD	OC[C@H]1O[C@@H](OC[C@H]2O[C@@H](OCCc3ccc(c(c3)O)O)[C@@H]([C@H]([C@@H]2OC(=O)/C=C/c2ccc(c(c2)O)O)O[C@@H]2O[C@@H](C)[C@@H]([C@H]([C@H]2O)O)O)O)[C@@H]([C@H]([C@@H]1O)O)O	UNPD228376	FSBUXLDOLNLABB-ISAKITKMSA-N	#N/A	#N/A	0.0127472	1
ERBB2	5281811	ERBB2	COc1c(O)cc2c(c1O)c(=O)c(co2)c1ccc(cc1)O	UNPD108275	OBBCRPUNCUPUOS-UHFFFAOYSA-N	#N/A	#N/A	0.0197777	1
MPEG1	5281812	MPEG1	COc1ccc(cc1)c1coc2c(c1=O)cc(c(c2)O)O	UNPD57558	GCWOYVFHJDNKIN-UHFFFAOYSA-N	#N/A	#N/A	0.0383762	1
PPARA	5282944	PPARA	CCCCC/C=C\C=C\C(CCCCCCCC(=O)O)O	UNPD154313	NPDSHTNEKLQQIJ-ZJHFMPGASA-N	#N/A	#N/A	0.0502778	1
OPRK1	5284371	OPRK1	COc1ccc2c3c1O[C@@H]1[C@@]43CCN([C@H](C2)[C@@H]4C=C[C@@H]1O)C	ATCMD3876	OROGSEYTTFOCAN-DNJOTXNNSA-N	DB00318	approved; illicit	0.0566125	1
PPARD	5312529	PPARD	CC/C=C\C/C=C\C/C=C\CCCCCCCCCC(=O)O	UNPD145785	AHANXAKGNAKFSK-PDBXOOCHSA-N	#N/A	#N/A	0.0583397	1
TSHR	5312662	TSHR	CCCCCCCCC#CC#CCCCCCC(=O)O	UNPD24547	LDZUDUYCHODRLO-UHFFFAOYSA-N	#N/A	#N/A	0.000577247	1
UGT1A1	5315502	UGT1A1	COc1ccc(c(c1)O)CCCc1ccc(cc1)O	UNPD59998	MSNVBURPCQDLEP-UHFFFAOYSA-N	#N/A	#N/A	0.0148297	1
HSD17B10	5316002	HSD17B10	C/C=C(\C(=O)OC1c2c(ccc3c2oc(=O)cc3)OC(C1OC(=O)C)(C)C)/C	UNPD11129	LYUZYPKZQDYMEE-WDZFZDKYSA-N	#N/A	#N/A	0.0152805	1
ALOX12	5317326	ALOX12	COc1cc(ccc1O)C[C@H]([C@H](Cc1ccc(c(c1)O)O)C)C	ATCMD7724	QKHJBWUGXMKHAK-QWHCGFSZSA-N	#N/A	#N/A	0.0184477	1
MPEG1	5318477	MPEG1	CCCCCCCCCCCCCCCCC1=C(O)C(=O)C=C(C1=O)OC	UNPD80598	WQIANGZKDMBPFV-UHFFFAOYSA-N	#N/A	#N/A	0.0390178	1
TDP2	5318575	TDP2	O=C1Nc2c(/C/1=C/1\C(=O)Nc3c1cccc3)cccc2	UNPD180761	MLCPSWPIYHDOKG-BUHFOSPRSA-N	#N/A	#N/A	0.0409159	1
PDE6A	5318980	PDE6A	COc1ccc(cc1)c1oc2c(CC=C(C)C)c(O)cc(c2c(=O)c1O)O	UNPD107599	TUUXBSASAQJECY-UHFFFAOYSA-N	#N/A	#N/A	0.01434	1
MAPT	5319502	MAPT	O=c1cc(C)c2c(o1)cc(c(c2)O)O	UNPD174402	KVOJTUXGYQVLAJ-UHFFFAOYSA-N	#N/A	#N/A	0.0118208	1
PARP1	5320693	PARP1	COc1ccc(cc1)c1cc(=O)c2c(o1)cc(cc2)O	UNPD50037	SQVXWIUVAILQRH-UHFFFAOYSA-N	#N/A	#N/A	0.0375705	1
TRPV1	5321851	TRPV1	CCCc1ccc(c(c1)c1cc(CCC)ccc1O)O	UNPD34682	OYAQUBKYAKSHOA-UHFFFAOYSA-N	#N/A	#N/A	0.0224189	1
PDE4B	5321960	PDE4B	COc1cc2oc(=O)ccc2c(c1CC=C(C)C)OC	UNPD81331	KRQHZFHWEAJPNO-UHFFFAOYSA-N	#N/A	#N/A	0.0514292	1
OPRK1	5324289	OPRK1	COC1=CC=C2[C@@]34[C@H]1Oc1c4c(C[C@H]2N(CC3)C)ccc1OC	TCMTW54048	FQXXSQDCDRQNQE-VMDGZTHMSA-N	#N/A	#N/A	0.0565933	1
UGT1A1	5324349	UGT1A1	Oc1ccc2c(c1)oc1c2c(=O)c2c(o1)cc(cc2O)O	UNPD31015	BBBAWACESCACAP-UHFFFAOYSA-N	#N/A	#N/A	0.0148412	1
AF366264	5351216	AF366264	Cn1c(=O)[nH]c2c(c1=O)ncnn2	UNPD5654	ZLLAXLPOOMLVRF-UHFFFAOYSA-N	#N/A	#N/A	0.0616814	1
AHR	5351344	AHR	COc1cc(/C=C\c2ccc(c(c2)O)OC)cc(c1OC)OC	UNPD50930	HVXBOLULGPECHP-WAYWQWQTSA-N	#N/A	#N/A	0.0122312	1
ALOX15	5353357	ALOX15	Oc1cc2c(=O)cc(oc2cc1O)c1ccccc1	UNPD141550	GSAOUZGPXSGVRS-UHFFFAOYSA-N	#N/A	#N/A	0.0146755	1
NPC1	5355594	NPC1	COc1ccc(cc1)/C=C/C(=O)c1ccc(cc1)O	UNPD139948	RTCVAWRRHHSOCC-NYYWCZLTSA-N	#N/A	#N/A	0.0308535	1
GAA	5358902	GAA	CCOC(=O)/C=C/C(=O)O	UNPD97902	XLYMOEINVGRTEX-ONEGZZNKSA-N	#N/A	#N/A	0.0371904	1
ADORA2B	5378171	ADORA2B	COc1ccc(cc1)c1cc(=O)c2c(o1)cc(cc2O)C	UNPD130568	BSEYWXDBSOCPQP-UHFFFAOYSA-N	#N/A	#N/A	0.0176154	1
ALOX15	5379071	ALOX15	COc1cc(O)c(c(c1)OC)C(=O)/C=C/c1ccc(c(c1)O)OC	UNPD16040	WMOWJHFPSNZXSK-GQCTYLIASA-N	#N/A	#N/A	0.00889074	1
USP2	5380406	USP2	Oc1ccc2c(c1)oc(=O)c1c2cccc1	UNPD124797	WXUQMTRHPNOXBV-UHFFFAOYSA-N	#N/A	#N/A	0.0107467	1
ESR2	5388063	ESR2	COc1ccc(cc1)/C=C/c1cc(OC)cc(c1)OC	UNPD127678	GDHNBPHYVRHYCC-SNAWJCMRSA-N	#N/A	#N/A	0.0172407	1
AURKB	5393164	AURKB	Oc1ccc2c(c1)oc(cc2=O)c1cc(O)c(c(c1)O)O	UNPD173292	CCCIGFPBADVTFE-UHFFFAOYSA-N	#N/A	#N/A	0.0394781	1
ACHE	5458190	ACHE	CCC1=C[C@@H]2CN3[C@H]1[C@@](C2)(C(=O)OC)c1[nH]c2c(c1CC3)cccc2	TCMTW48510	CMKFQVZJOWHHDV-NQZBTDCJSA-N	#N/A	#N/A	0.0335374	1
HSD17B10	5458526	HSD17B10	COc1cc(O)c(cc1C/C=C/c1ccccc1)OC	UNPD77788	MGFYJNMOZGSGMU-RMKNXTFCSA-N	#N/A	#N/A	0.0154006	1
MAOB	5480342	MAOB	COc1c(O)cc2c(c1O)c(=O)c1c(o2)c(O)ccc1	UNPD144107	JAOZFCHZESUBKS-UHFFFAOYSA-N	#N/A	#N/A	0.0203954	1
PCSK7	5491415	PCSK7	CC(=O)NCCc1ccc(c(c1)c1c(O)c(O)c2c(c1O)C(=O)c1c(C2=O)cc(c(c1C(=O)O)C(=O)O)O)O	UNPD40842	IHLWXZNPOVMUFQ-UHFFFAOYSA-N	#N/A	#N/A	0.0245481	1
HSP90AB1	5705529	HSP90AB1	OC[C@H]1O[C@@H](OC2OCC[C@@H]3[C@H]2[C@@]2(CO)O[C@H]2[C@H]3OC(=O)c2ccc(cc2)O)[C@@H]([C@H]([C@@H]1O)O)O	UNPD213906	QDTCMYWFUPXQPA-RWORTQBESA-N	#N/A	#N/A	0.0391811	1
MAPT	5748605	MAPT	COc1cc(ccc1OC)c1coc2c(c1=O)ccc(c2)O	UNPD39628	VFZIJLPRJAQGFO-UHFFFAOYSA-N	#N/A	#N/A	0.0118278	1
CHRNB2	5811533	CHRNB2	Oc1ccc(c(c1)O)C(=O)/C=C/c1ccccc1O	UNPD86196	MACMAADVRVVHBD-VMPITWQZSA-N	#N/A	#N/A	0.0552209	1
DRD1	5927890	DRD1	COc1ccc(cc1)C(=O)/C=C/c1ccc(cc1)O	UNPD164223	WSEGRADBFAKNHQ-NYYWCZLTSA-N	#N/A	#N/A	0.0105684	1
HSD17B10	5967872	HSD17B10	COC1=CC(=O)C(=C/C/1=C\C=C\c1ccccc1)O	UNPD53436	LUZUAYAKZLCOCQ-BHHNFLQBSA-N	#N/A	#N/A	0.00845239	1
PPARA	6253276	PPARA	COc1ccc(cc1)/C=C/C(=O)c1c(O)cc(c(c1OC)OC)OC	UNPD106678	FRISOFZUHCOQEC-JXMROGBWSA-N	#N/A	#N/A	0.0499639	1
UGT1A1	6260040	UGT1A1	COc1cccc2c1c(=O)c1c(o2)cc(cc1)O	UNPD90229	UKPKWIBNYWUEMK-UHFFFAOYSA-N	#N/A	#N/A	0.0148375	1
CHEK2	6312649	CHEK2	Nc1ncc([nH]1)/C=C/CNC(=O)c1[nH]c(c(c1)Br)Br	UNPD15166	QKJAXHBFQSBDAR-OWOJBTEDSA-N	#N/A	#N/A	0.0241472	1
HPGD	6371716	HPGD	CC/C=C/C/C=C/C/C=C/CCCCCCCC(=O)OCC	UNPD211841	JYYFMIOPGOFNPK-XSHSMGBESA-N	#N/A	#N/A	0.00935069	1
MAP2K1	6419741	MAP2K1	O=c1[nH]c(=O)c2c1c1c3ccccc3[nH]c1n1c2cnc1	UNPD162405	WXUJAQBSBZLVEV-UHFFFAOYSA-N	#N/A	#N/A	0.020963	1
RECQL	6436187	RECQL	O[C@@H]1C[C@@H]2[C@@H](C1)/C=C/CCC[C@@H](OC(=O)/C=C/[C@H]2O)C	TCMID8367	KQNZDYYTLMIZCT-KFKPYADVSA-N	#N/A	#N/A	0.00762414	1
ERBB2	6439158	ERBB2	O=N(=O)/C=C/c1ccc(c(c1)O)O	UNPD74971	LLJASJHXECDHOM-ONEGZZNKSA-N	#N/A	#N/A	0.019782	1
CNR1	6443006	CNR1	CCCCCCC/C=C/C=C/C(=O)NCC(C)C	UNPD71331	BBRMJCAPNGJKEM-AQASXUMVSA-N	#N/A	#N/A	0.107168	1
HBB	6543478	HBB	O=C1O[C@@]23C(C1=C)CC[C@H]([C@@H]2CC[C@@]1([C@H]3O1)C)C	ATCMD1781	QWQSMEDUZQDVLA-KPHNHPKPSA-N	#N/A	#N/A	0.0438541	1
KDM4E	6560141	KDM4E	C[C@H](CCC[C@]1(C)CCc2c(O1)c(C)c(c(c2C)O)C)CCC[C@H](CCCC(C)C)C	TCMSP2420	GVJHHUAWPYXKBD-IHMCZWCLSA-N	#N/A	#N/A	0.0106452	1
HSD17B10	6604254	HSD17B10	C/C=C/1\C[C@H](C)[C@@](O)(CO)C(=O)OCC2=CCN3[C@H]2[C@H](OC1=O)CC3	UNPD222367	BCJMNZRQJAVDLD-XMUXOPMXSA-N	#N/A	#N/A	0.0152338	1
ALOX12	6857797	ALOX12	C#CCCCCCCCCCCCc1ccco1	UNPD117792	ONYOTXAYIZRIPJ-UHFFFAOYSA-N	#N/A	#N/A	0.0183723	1
HSD11B2	6918774	HSD11B2	C[C@@H]1CC[C@]2([C@@H]([C@H]1C)C1=CC[C@H]3[C@@]([C@@]1(CC2)C)(C)CC[C@@H]1[C@]3(C)C[C@@H](O)[C@@H](C1(C)C)O)C(=O)O	ATCMD4078	HFGSQOYIOKBQOW-ZSDYHTTISA-N	#N/A	#N/A	0.029115	1
DAO	6971294	DAO	OC(=O)[C@H](Cn1ccc(=O)c(c1)O)N	TCMTW52079	WZNJWVWKTVETCG-YFKPBYRVSA-N	DB01055	approved	0.0576574	1
TSHR	9543636	TSHR	CCCCCCCCC#CC#C/C=C/CCCC(=O)O	UNPD140311	IGVKWAAPMVVTFX-BUHFOSPRSA-N	#N/A	#N/A	0.000563865	1
LMNA	9568700	LMNA	CNC(=O)O/N=C/C(S(=O)C)(C)C	UNPD43343	BXPMAGSOWXBZHS-WEVVVXLNSA-N	#N/A	#N/A	0.00746521	1
PDE6A	9799499	PDE6A	CC(=CCc1c(O)cc(c2c1oc(c1ccc(c(c1)O)O)c(c2=O)O)O)C	UNPD18070	ZHTTWVRMGWQEOH-UHFFFAOYSA-N	#N/A	#N/A	0.0143162	1
F2	9817887	F2	C=C[C@@]1(C)CC=C2[C@H](C1)CC[C@H]1[C@@]2(C)CCC[C@@]1(C)C(=O)O	TCMTW24904	TVHDZSRRHQKNEZ-MGFONVBGSA-N	#N/A	#N/A	0.0526309	1
MMP12	9819306	MMP12	COC1=C[C@@]23C[C@@H](OC2=CC1=O)C[C@@H]([C@H]3C)c1ccc2c(c1)OCO2	TCMID9969	SXHVHWXETMBKPP-KXXATPMCSA-N	#N/A	#N/A	0.035834	1
LMNA	9821539	LMNA	C/C=C(\C(=O)O[C@@H]1[C@H](OC(=O)C)c2c(OC1(C)C)ccc1c2oc(=O)cc1)/C	ATCMD11600	XGPBRZDOJDLKOT-YRCPKEQFSA-N	#N/A	#N/A	0.0120075	1
VCP	9872976	VCP	Oc1cc(O)c2c(c1)O[C@@]1([C@@H]([C@H]2c2c(O1)cc(c1c2O[C@@H]([C@H](C1)O)c1ccc(c(c1)O)O)O)O)c1ccc(c(c1)O)O	ATCMD17807	NSEWTSAADLNHNH-TXZJYACMSA-N	#N/A	#N/A	0.0377043	1
ALOX12	10029508	ALOX12	Brc1cc(Br)c2c(c1)Oc1c(O2)c(Br)c(cc1O)Br	UNPD88176	SSCRQJOLSHUSSG-UHFFFAOYSA-N	#N/A	#N/A	0.0197063	1
PDE4B	10046907	PDE4B	COC1=CC(=O)c2c(C1=O)c(cc(c2)C)c1c(OC)cc(c2c1oc(=O)cc2)OC	UNPD151908	SQTLGMZYHSFVGI-UHFFFAOYSA-N	#N/A	#N/A	0.0515235	1
F2	10070992	F2	Oc1ccc2c(c1)CCc1ccc(cc1)Oc1cc(CCc3ccc2c(O)c3)ccc1O	UNPD176593	JMKSVONWZFVEAI-UHFFFAOYSA-N	#N/A	#N/A	0.0527091	1
PTGS2	10071029	PTGS2	O=C1CC[C@@H]2C(=CC[C@H]3[C@@]2(C)CC[C@@]2([C@]3(C)CC[C@@]3([C@H]2CC(C)(C)CC3)C)C)C1(C)C	ATCMD8769	XUPCBKGIPJPDGW-VZTATICASA-N	#N/A	#N/A	0.0438858	1
PDE4B	10105863	PDE4B	CC1(C)C=Cc2c(O1)c(O)cc1c2oc(=O)cc1	UNPD55925	OYPWMLRFDXSKJG-UHFFFAOYSA-N	#N/A	#N/A	0.0514322	1
LMNA	10129992	LMNA	NC(=O)CCc1c[nH]cc1	CNPD3594	TWGRVIPCCGRSNM-UHFFFAOYSA-N	#N/A	#N/A	0.000425298	1
HTR2B	10130594	HTR2B	C1C[C@@H]2[C@H](C1)c1c3N2CCNCc3ccc1	TCMID7118	XOSKJKGKWRIMGV-DGCLKSJQSA-N	#N/A	#N/A	0.0445705	1
PDE6A	10246505	PDE6A	CC(=CCc1c(O)cc(c2c1oc(cc2=O)c1ccc(cc1)O)O)C	UNPD90137	MEHHCBRCXIDGKZ-UHFFFAOYSA-N	#N/A	#N/A	0.0143464	1
PPARA	10337211	PPARA	COc1cc2O[C@@H](CC(=O)c2cc1CC=C(C)C)c1ccc(cc1)O	ATCMD2168	VOCGSQHKPZSIKB-FQEVSTJZSA-N	#N/A	#N/A	0.0499673	1
PLA2G2A	10362969	PLA2G2A	CC(=CCc1cc2c(cc1O)OCc1c2oc2c1ccc(c2CC=C(C)C)O)C	UNPD169973	VNTSSLCFFUCTNP-UHFFFAOYSA-N	#N/A	#N/A	0.0513705	1
GALE	10412869	GALE	O/N=C(/C(=O)NCCSSCCNC(=O)C(=O)O)\Cc1ccc(c(c1)Br)O	UNPD4452	RANXASMHOHQHDA-YBFXNURJSA-N	#N/A	#N/A	0.036243	1
ALOX12	10554258	ALOX12	COc1cc(Br)cc(c1Oc1cc(Br)cc(c1O)Br)Br	UNPD111894	ZMXOEWVGOVDWHT-UHFFFAOYSA-N	#N/A	#N/A	0.0196799	1
MAP2K1	10634145	MAP2K1	O=C1NC(=O)/C(=C/2\CCNC(=O)c3c2cc[nH]3)/N1	UNPD90997	MOYLWFAZPQYOGQ-VURMDHGXSA-N	#N/A	#N/A	0.000542381	1
LMNA	10655770	LMNA	CC(=CCn1cnc2c1ncnc2N)C	UNPD91500	QHLQYTNMSXEBIQ-UHFFFAOYSA-N	#N/A	#N/A	0.000838508	1
TDP1	10958572	TDP1	COc1cc2OC(C)(C)C=Cc2c2c1c(=O)cc(o2)c1ccccc1	UNPD41049	DPAGRPSAFDXQDN-UHFFFAOYSA-N	#N/A	#N/A	0.0121209	1
POLB	11014401	POLB	CCCCCCCCCCCCCCCC[C@]1(O)C=CC(=O)[C@H]1C(=O)OC	UNPD222173	KWZRXBBTMLZDDX-GMAHTHKFSA-N	#N/A	#N/A	0.0480016	1
PTGS2	11034312	PTGS2	CC(=CCc1cc(/C=C/c2cc(O)cc(c2)O)c(cc1O)O)C	UNPD173178	KYQWCQJWDVPXKY-GQCTYLIASA-N	#N/A	#N/A	0.0441885	1
CHEK2	11064594	CHEK2	Brc1[nH]c2c(c1)C(=O)CCNC2=O	UNPD178483	INYSELGLAAADNH-UHFFFAOYSA-N	#N/A	#N/A	0.013714	1
GALE	11092030	GALE	O/N=C(/C(=O)NCCSSCCNC(=O)C(=O)N)\Cc1ccc(c(c1)Br)O	UNPD96131	YGIKYEWREOTRIM-RGVLZGJSSA-N	#N/A	#N/A	0.0362678	1
MAPT	11563133	MAPT	O=C(Oc1c(c2ccc(cc2)O)c(O)c(c(c1OC(=O)Cc1ccccc1)c1ccc(cc1)O)O)Cc1ccccc1	UNPD117006	NOJUKCRPSUMHQQ-UHFFFAOYSA-N	#N/A	#N/A	0.00051282	1
PTPRC	11723433	PTPRC	O=C/C(=C\C[C@H]1C(=C)CC[C@@H]2[C@]1(C)CCCC2(C)C)/CC(=O)O	UNPD214251	ZAWWSYIDZKWRAI-DTFKRFDDSA-N	#N/A	#N/A	0.0531946	1
PTGES	11742283	PTGES	CC(=O)Oc1c(c2ccc(cc2)O)c(O)c(c(c1O)c1ccc(cc1)O)OC(=O)C	UNPD109387	WOUMFZZOFGTIFS-UHFFFAOYSA-N	#N/A	#N/A	0.0302015	1
HSP90AB1	11948660	HSP90AB1	OC[C@H]1O[C@@H](O[C@H]2OC=CC3C2[C@]2(CO)O[C@@H]2[C@@H]3OC(=O)/C=C/c2ccc(c(c2)O)O)[C@@H]([C@H]([C@@H]1O)O)O	TCMID7242	MZQXNUBTVLKMLP-VXPVLMLZSA-N	#N/A	#N/A	0.0391766	1
HSP90AB1	11948661	HSP90AB1	OC[C@H]1O[C@@H](OC2OC=C[C@@H]3[C@H]2[C@@]2(CO)O[C@H]2[C@H]3OC(=O)/C=C/c2ccc(cc2)O)[C@@H]([C@H]([C@@H]1O)O)O	UNPD217824	SKNVKBJSSSJNCI-UIBFFPKISA-N	#N/A	#N/A	0.0391754	1
ALOX12	11952901	ALOX12	Brc1ccc(c(c1)Br)Oc1c(O)cc(c(c1Br)Br)Br	UNPD180771	LNZHBUPVHNJGJG-UHFFFAOYSA-N	#N/A	#N/A	0.0201457	1
ALOX12	11978695	ALOX12	Brc1ccc(c(c1)Br)Oc1cc(Br)c(c(c1O)Br)Br	UNPD161824	FSIJSYKTNOYMTQ-UHFFFAOYSA-N	#N/A	#N/A	0.0201457	1
UGT1A1	12083341	UGT1A1	COc1cc(O)c2c(c1)oc1c(c2=O)c2c(o1)cc(cc2)O	UNPD211713	KVZNFUGKQAFTBW-UHFFFAOYSA-N	#N/A	#N/A	0.0148331	1
PPARA	13965473	PPARA	COc1ccc(cc1O)c1coc2c(c1=O)cc(c(c2)O)OC	UNPD132775	BYNYZQQDQIQLSO-UHFFFAOYSA-N	#N/A	#N/A	0.0500059	1
CHEK2	14056555	CHEK2	Brc1[nH]c(cc1Br)C(=O)N	UNPD119416	VTWHNVAKXBNGFV-UHFFFAOYSA-N	#N/A	#N/A	0.0240983	1
MAOA	14079439	MAOA	COc1ccc(cc1)/C=C/1\COc2c(C1=O)ccc(c2)O	UNPD101943	DLQSYZMPSWHYMW-XYOKQWHBSA-N	#N/A	#N/A	0.0281505	1
USP2	14159747	USP2	COc1cc(OC)c(c(c1C(=O)/C=C/c1ccccc1)O)O	UNPD116600	IAYOHSHBLLHXFB-CMDGGOBGSA-N	#N/A	#N/A	0.0107719	1
CHRNA7	14262868	CHRNA7	COc1c(OC)cc2c3c1c1cc(OC)c(cc1C[C@@H]3[N+](CC2)(C)C)O	ATCMD22686	FGUCOPALAZXICJ-HNNXBMFYSA-O	#N/A	#N/A	0.044294	1
TSHR	14309404	TSHR	CCCCCCCCC#C/C=C/CCCCCC(=O)O	UNPD78346	BWSIKEZDJMZITO-VAWYXSNFSA-N	#N/A	#N/A	0.000555365	1
TSHR	14309405	TSHR	CCCCCCCCC#C/C=C\CCCCCC(=O)O	UNPD133342	BWSIKEZDJMZITO-QXMHVHEDSA-N	#N/A	#N/A	0.000555365	1
TSHR	14309406	TSHR	CCCCC#CC#CCCCCCC(=O)O	UNPD167632	UDDQRZKIDJCZJF-UHFFFAOYSA-N	#N/A	#N/A	0.000557697	1
TSHR	14309407	TSHR	CCCCCCCCC#CC#CC1OC1CCCC(=O)O	UNPD30825	XLDNBXDVNANPCY-UHFFFAOYSA-N	#N/A	#N/A	0.000513769	1
TSHR	14309408	TSHR	CCCCCCCCC#CC#CC(CCCCC(=O)O)O	UNPD148346	APWVQFPFWVNZPF-UHFFFAOYSA-N	#N/A	#N/A	0.000529832	1
OPRK1	14355117	OPRK1	CCCCC/C=C/c1c(O)cc(c(c1C=O)O)CC=C(C)C	UNPD39165	FYGPFTSGVSZKAJ-CMDGGOBGSA-N	#N/A	#N/A	0.0564928	1
OPRD1	14376449	OPRD1	C/C(=C\COc1ccc2c(c1)oc(=O)cc2)/CC(C=C(C)C)O	UNPD153549	VNADFOGBKXRWGC-RIYZIHGNSA-N	#N/A	#N/A	0.0704241	1
HSD17B10	14671620	HSD17B10	O=C1NCCCCCN(O)C(=O)CCC(=O)NCCCCCN(C(=O)CCC(=O)NCCCCN(C(=O)CC1)O)O	UNPD89699	SXTGVXKFOVZYIK-UHFFFAOYSA-N	#N/A	#N/A	0.0152241	1
MPEG1	15379534	MPEG1	C/C(=C\CC/C(=C/CC1=C(O)C(=O)C=C(C1=O)O)/C)/CCC=C(C)C	UNPD137291	ADRVEZVEKSCRHP-XGGJEREUSA-N	#N/A	#N/A	0.0388835	1
USP2	15382621	USP2	COc1c(CC=C(C)C)cc(cc1CC=C(C)C)C1CC(=O)c2c(O1)cc(cc2O)O	UNPD194884	JHEBMTRMMJXPTM-UHFFFAOYSA-N	#N/A	#N/A	0.0107693	1
MAOA	15484393	MAOA	Oc1ccc(cc1)/C=C/1\COc2c(C1=O)c(O)cc(c2)O	UNPD11849	PKCWSPYCHMNVKB-BJMVGYQFSA-N	#N/A	#N/A	0.0281912	1
UGT1A1	16094542	UGT1A1	Oc1ccc(cc1)C1CC(=O)c2c(O1)c(C)c(cc2O)O	UNPD112465	GMVYLXBMPRDZDR-UHFFFAOYSA-N	#N/A	#N/A	0.014829	1
TP53	16376440	TP53	COc1cc(ccc1O)/C=C/1\Oc2c(C1=O)ccc(c2)O	UNPD173729	HPSPCMSCDNHZJM-CHHVJCJISA-N	#N/A	#N/A	0.00840019	1
TYMS	16681745	TYMS	CC(=O)OC(c1nc2ccccc2c(=O)n1C1CC2(OC1=O)c1ccccc1N1C2N(O)C(C1=O)(C)C)C(C)C	UNPD100643	CYNVLFGDEQQUPE-UHFFFAOYSA-N	#N/A	#N/A	0.0523285	1
PSIP1	16745403	PSIP1	Oc1cc(ccc1C(CCCC(O)(C)C)(O)C)C(=O)O	UNPD196419	YCUWMGPYKGLQQF-UHFFFAOYSA-N	#N/A	#N/A	0.0173551	1
PPARA	17950432	PPARA	COc1cc(CCc2ccccc2)c(c(c1CC=C(C)C)O)C(=O)O	UNPD126535	CTNFTPUIYFUXBE-UHFFFAOYSA-N	#N/A	#N/A	0.0500482	1
CTSL	19093029	CTSL	COc1c(OC)c(OC)c2c(c1O)c(=O)c1c(n2C)c(O)ccc1	UNPD20605	QYPQTPVQPNLXHV-UHFFFAOYSA-N	#N/A	#N/A	0.0483673	1
OPRK1	21593990	OPRK1	COC1=CC[C@@]23[C@@]4([C@@]1(O)O[C@@H](C4)c1c3c(O)c(cc1)OC)N(C)CC2	TCMID1512	MLEYOIRGICHLGN-PZGXJPJSSA-N	#N/A	#N/A	0.0767364	1
PTGS2	21596130	PTGS2	Oc1ccc(c(c1)O)C1CC(=O)c2c(O1)cc(cc2O)O	UNPD10194	QBLQLKNOKUHRCH-UHFFFAOYSA-N	#N/A	#N/A	0.0439588	1
HSD17B10	23843932	HSD17B10	CC(=O)NC1CCCN(O)C(=O)/C=C(\C)/CCOC(=O)C(CCCN(O)C(=O)/C=C(/CCOC(=O)C(CCCN(C(=O)/C=C(/CCOC1=O)\C)O)NC(=O)C)\C)NC(=O)C	UNPD171694	VGXYDZCCQDSGLZ-YMYYPMOMSA-N	#N/A	#N/A	0.015258	1
PPARA	23874497	PPARA	CCCCCc1cc(OC)c(c(c1C(=O)O)O)CC=C(C)C	UNPD134207	UJSSSFNGQWZNEN-UHFFFAOYSA-N	#N/A	#N/A	0.0500733	1
PPARA	24180661	PPARA	COC(=O)c1cc2c(c(c1C(OC(=O)CO)C)O)C(=O)c1c(C2=O)c2c(cc1O)cc(c(c2OC)Cl)C	UNPD143680	LMNHPKWXMIGBEL-UHFFFAOYSA-N	#N/A	#N/A	0.0499464	1
PPARA	24762578	PPARA	COc1c(Cl)c(C)cc2c1c1C(=O)c3cc4C(=O)OC(c4c(c3C(=O)c1c(c2)O)O)C	UNPD170621	RSSUHOCYQSARQQ-UHFFFAOYSA-N	#N/A	#N/A	0.0499458	1
PPARA	24762579	PPARA	COC(=O)c1cc2c(c(c1CC)O)C(=O)c1c(C2=O)c2c(cc1O)cc(c(c2OC)Cl)C	UNPD133360	NFJVYTZFJNVKBA-UHFFFAOYSA-N	#N/A	#N/A	0.0499593	1
PPARA	24762580	PPARA	COC(=O)c1cc2c(c(c1C(OC(=O)C)C)O)C(=O)c1c(C2=O)c2c(cc1O)cc(c(c2OC)Cl)C	UNPD141093	MFLXCCWOEBQIHW-UHFFFAOYSA-N	#N/A	#N/A	0.0499452	1
HSD17B10	24867634	HSD17B10	COc1cc(O)c(cc1C/C=C\c1ccccc1)OC	UNPD151286	MGFYJNMOZGSGMU-TWGQIWQCSA-N	#N/A	#N/A	0.0154006	1
CASP7	24879338	CASP7	CC(CC1(O)NC(=O)C2(C1O)OC(=CC2=O)Cc1ccccc1)C	UNPD27013	KYPWBBBOBAOGSQ-UHFFFAOYSA-N	#N/A	#N/A	0.0636661	1
HSD17B2	24883422	HSD17B2	OC[C@]1(C)CCC[C@@]2([C@@H]1CC[C@@]13[C@H]2CC[C@@H](C3)C(=C)C1)C	ATCMD12139	TUJQVRFWMWRMIO-GNVSMLMZSA-N	#N/A	#N/A	0.0204749	1
LMNA	25246407	LMNA	SC[C@@H](C(=O)NCC(=O)O)NC(=O)CC[C@@H](C(=O)O)N	TCMID10933	RWSXRVCMGQZWBV-WDSKDSINSA-N	DB00143	approved; nutraceutical	0.000454783	1
PPARA	40484423	PPARA	COc1cc2O[C@H](CC(=O)c2cc1CC=C(C)C)c1ccc(cc1)O	UNPD223512	VOCGSQHKPZSIKB-HXUWFJFHSA-N	#N/A	#N/A	0.0499673	1
CNR1	40490622	CNR1	CCCCC/C=C\C/C=C\C/C=C\C/C=C\CCCC(=O)OC[C@@H](CO)O	UNPD211706	DCPCOKIYJYGMDN-NZRYSPDRSA-N	#N/A	#N/A	0.027389	1
PTGS2	42605184	PTGS2	CC(=CCc1c(O)ccc2c1oc(c2)c1cc(O)cc(c1)O)C	UNPD167869	PMSZSXKBGUQXFG-UHFFFAOYSA-N	#N/A	#N/A	0.0441753	1
MAOB	44284812	MAOB	COc1c(OC)c(OC)c(c2c1CCN=C2C)OC	UNPD157310	TVPUZRRHFOHEPI-UHFFFAOYSA-N	#N/A	#N/A	0.0203653	1
FNTB	44332383	FNTB	CCCCCCCC/C=C\CCCCCC/C(=C(/C(=O)O)\C)/C(=O)O	UNPD90713	VTTDLGQEAGEBOQ-PLWCYHAZSA-N	#N/A	#N/A	0.130809	1
PTAFR	44336126	PTAFR	COc1cc(ccc1OC(C(c1ccc(c(c1)OC)OC)O)C)[C@H]1O[C@@H]([C@@H]([C@H]1C)C)c1ccc(c(c1)OC)OC(C(c1ccc(c(c1)OC)OC)O)C	TCMID9979	ZGXXNVOBEIRACL-JAWLWFRMSA-N	#N/A	#N/A	0.000626295	1
LMNA	44367445	LMNA	OC(=O)C[C@@H](C(=O)O)N	ATCMD1882	CKLJMWTZIZZHCS-REOHCLBHSA-N	DB00128	approved; nutraceutical	0.012119	1
PTGS2	44428631	PTGS2	COc1cc(O)c(c(c1C(=O)/C=C/c1ccc(cc1O)O)O)C[C@H](C(=C)C)CC=C(C)C	UNPD211956	PIAPWPAWQGDOMN-SXAWMYDMSA-N	#N/A	#N/A	0.043986	1
F2	44559230	F2	CC([C@H]1CC[C@@]2([C@]1(C)CC[C@@]1([C@H]2CC=C2[C@H]1CC[C@H](C2(C)C)O)C)C)CC/C=C(/C(=O)O)\C	ATCMD18848	JMOPTHLWCJXLBX-IJAJUTMCSA-N	#N/A	#N/A	0.0526424	1
PPARA	44584224	PPARA	COc1cc2oc(cc(=O)c2cc1CC=C(C)C)c1ccc(cc1)O	TCMID6442	BVTZAHKRSBADDO-UHFFFAOYSA-N	#N/A	#N/A	0.0499777	1
ALOX12	46224610	ALOX12	NC(=N)NOCC[C@@H](C(=O)O)N	TCMSP335	FSBIGDSBMBYOPN-VKHMYHEASA-N	DB01833	experimental	0.00950046	1
OPRK1	53388784	OPRK1	CCCCC/C=C/c1c(O)cc(c(c1CO)O)CC=C(C)C	UNPD202326	DLFLMSMGNSXYFJ-CMDGGOBGSA-N	#N/A	#N/A	0.0767046	1
SLCO2B1	54676535	SLCO2B1	COc1c(CC=C(C)C)c2OC(C)(C)C=Cc2c2c1c(O)c(c(=O)o2)c1ccc(cc1)O	UNPD115074	AAKJUGSASOCUFQ-UHFFFAOYSA-N	#N/A	#N/A	0.0161744	1
PRKCA	56841025	PRKCA	CCCCCCCCCCCCCCCC(=O)OC1C(=C[C@]23[C@]1(O)[C@H](O)C(=C[C@H](C3=O)[C@H]1[C@@H](C[C@H]2C)C1(C)C)CO)C	ATCMD11024	DOSPRDHNGNPKKJ-BYPUAWAASA-N	#N/A	#N/A	0.0519505	1
PPARA	57345550	PPARA	CCC/C=C\C#C/C=C/C(=O)CCCCCCCC(=O)O	UNPD206750	SNUNXDVKYBQMPJ-UZWKOAOVSA-N	#N/A	#N/A	0.0502591	1
PPARA	66575621	PPARA	CC[C@H](C[C@]1(CC)C=C(/C(=C/C(=O)OC)/O1)CC)/C=C/C(=O)C	UNPD229415	DCHODBHTJLPAJL-WJNDYHRLSA-N	#N/A	#N/A	0.0499732	1
PPARA	66575622	PPARA	CC[C@H](C[C@]1(CC)C=C(/C(=C/C(=O)OC)/O1)CC)/C=C/[C@@H](O)C	UNPD210426	YNPVSGZQMXBKIO-CEJKPMKJSA-N	#N/A	#N/A	0.0499779	1
PPARA	70690902	PPARA	CCCCCC(/C=C\C=C/CCCCCCCC(=O)O)O	UNPD134346	HNICUWMFWZBIFP-YUKZMVOFSA-N	#N/A	#N/A	0.0502778	1
ALOX12	70691185	ALOX12	C/C(=C\COc1ccc2c(c1)ccc(=O)o2)/CC/C=C(/CCC=C(C)C)\C	UNPD21792	JAASWVRGXJPPHR-WOWYBKFKSA-N	#N/A	#N/A	0.0184076	1
PPARA	71451878	PPARA	CC[C@H](C[C@]1(CC)C=C(C(=O)O1)CC)/C=C/C(=O)C	UNPD214669	YKBFZCLRVPKNRE-FTJFNGAWSA-N	#N/A	#N/A	0.0499739	1
VCP	71521862	VCP	Oc1ccc(cc1)[C@H]1Oc2cc(O)cc(c2[C@@H](C1)c1c(O)cc(c2c1O[C@H](c1ccc(cc1)O)[C@H](C2)O)O)O	UNPD223233	FWNROEJRQURIKY-VGGRNRAKSA-N	#N/A	#N/A	0.0377067	1
HSP90AB1	71574360	HSP90AB1	OC[C@H]1O[C@@H](OC2OC=C[C@@H]3[C@H]2[C@](O)(CO)C[C@H]3OC(=O)/C=C\c2ccc(cc2)O)[C@@H]([C@H]([C@@H]1O)O)O	UNPD221151	LFCXXHMQZUKIEF-OKBIWPNBSA-N	#N/A	#N/A	0.0391754	1
OPRK1	73351885	OPRK1	COc1cc2CC(=O)CCCC(=O)CCC[C@H](OC(=O)c2c(c1)O)C	UNPD215007	KZNJLZNZCKOJIX-GFCCVEGCSA-N	#N/A	#N/A	0.0766854	1
UGT1A1	73351956	UGT1A1	OC(=O)[C@@]1(C)CCC[C@]2([C@H]1CC(=O)c1c2ccc(c1)C(O)(C)C)C	UNPD219050	MXPXAZNVQUWDFH-AHRSYUTCSA-N	#N/A	#N/A	0.0148017	1
UGT1A1	73353409	UGT1A1	OC(=O)CC[C@@]12C[C@@]32CC[C@]2([C@@]([C@@H]3C3[C@H]([C@H]1C(=C)C)O3)(C)CC[C@@H]2C(CC/C=C(/C(=O)O)\C)C)C	UNPD229763	GTXURSDLUXIYCG-NMDGECQMSA-N	#N/A	#N/A	0.0147979	1
SLCO2B1	76333163	SLCO2B1	COC(=O)C[C@@H]1[C@]2(C)[C@H](C[C@@H](C1(C)C)OC(=O)C)O[C@]13C(=C)C2CC[C@@]3(C)[C@@H](OC(=O)C1)c1ccoc1	UNPD219609	UWOANMOYULTSJG-XBGRQLTRSA-N	#N/A	#N/A	0.0161501	1
PDE4B	90655369	PDE4B	COc1cc2ccc(=O)oc2c2c1OC(C)(C)CC2	UNPD160791	BZMZEWWDSNLUOM-UHFFFAOYSA-N	#N/A	#N/A	0.0514293	1
MPEG1	118733906	MPEG1	CCCCCCCCCCCCCCCCC1=C(O)C(=O)C=C(C1=O)O	UNPD153381	BLVJLLJNXHHQIN-UHFFFAOYSA-N	#N/A	#N/A	0.039064	1
CA2	127	CA2	OC(=O)Cc1ccc(cc1)O	UNPD154511	XQXPVVBIMDBYFF-UHFFFAOYSA-N	#N/A	#N/A	0.0368949	1
PGD	143	PGD	O=CN1C(CNc2ccc(cc2)C(=O)NC(C(=O)O)CCC(=O)O)CNc2c1c(O)nc(n2)N	UNPD84575	VVIAGPKUTFNRDU-UHFFFAOYSA-N	#N/A	#N/A	0.0258535	1
HDAC10	264	HDAC10	CCCC(=O)O	UNPD136414	FERIUCNNQQJTOY-UHFFFAOYSA-N	DB03568	experimental	0.0253217	1
MAPT	275	MAPT	NC(=N)NOCCC(C(=O)O)N	UNPD20660	FSBIGDSBMBYOPN-UHFFFAOYSA-N	#N/A	#N/A	0.00863663	1
LMNA	401	LMNA	NC1CONC1=O	UNPD122323	DYDCUQKUCUHJBH-UHFFFAOYSA-N	#N/A	#N/A	0.0165286	1
CHRNA4	412	CHRNA4	C1CNC(C1)c1cccnc1	UNPD33918	MYKUKUCHPMASKF-UHFFFAOYSA-N	#N/A	#N/A	0.032752	1
CA1	460	CA1	COc1ccccc1O	UNPD120175	LHGVFZTZFXWLCP-UHFFFAOYSA-N	#N/A	#N/A	0.0192752	1
PNP	790	PNP	O=c1[nH]cnc2c1nc[nH]2	UNPD77089	FDGQSTZJBFJUBT-UHFFFAOYSA-N	#N/A	#N/A	0.111249	1
CA5A	798	CA5A	c1ccc2c(c1)[nH]cc2	UNPD87342	SIKJAQJRHWYJAI-UHFFFAOYSA-N	#N/A	#N/A	0.0429279	1
CAMK2D	936	CAMK2D	NC(=O)c1cccnc1	UNPD180877	DFPAKSUCGFBDDF-UHFFFAOYSA-N	DB02701	approved	0.0210158	1
CHRNA7	942	CHRNA7	CN1CCCC1c1cccnc1	UNPD140781	SNICXCGAKADSCV-UHFFFAOYSA-N	DB00184	approved	0.0366246	1
RECQL	1030	RECQL	OCC(O)C	UNPD70824	DNIAPMSPPWPWGF-UHFFFAOYSA-N	DB01839	experimental	0.0123504	1
RECQL	1049	RECQL	c1cccnc1	UNPD92016	JUJWROOIHBZHMG-UHFFFAOYSA-N	#N/A	#N/A	0.0121769	1
LMNA	1123	LMNA	NCCS(=O)(=O)O	UNPD155946	XOAAWQZATWQOTB-UHFFFAOYSA-N	DB01956	experimental	0.0163877	1
RECQL	1183	RECQL	COc1cc(C=O)ccc1O	UNPD137556	MWOOGOJBHIARFG-UHFFFAOYSA-N	#N/A	#N/A	0.0124275	1
CHRFAM7A	1211	CHRFAM7A	COc1cc2CCN(C3c2cc1Oc1cc(ccc1O)CC1c2c(CC[N+]1(C)C)cc(c(c2Oc1ccc(C3)cc1)O)OC)C	UNPD152479	JFJZZMVDLULRGK-UHFFFAOYSA-O	#N/A	#N/A	0.0355251	1
POLB	1249	POLB	Oc1cc2OC(c3cc(O)c(c(c3)O)O)C(Cc2c(c1)O)O	UNPD20600	XMOCLSLCDHWDHP-UHFFFAOYSA-N	#N/A	#N/A	0.0201557	1
CA3	1374	CA3	OCC1NCC(C(C1O)O)O	UNPD10697	LXBIFEVIBLOUGU-UHFFFAOYSA-N	#N/A	#N/A	0.0187921	1
RECQL	1486	RECQL	OC(=O)COc1ccc(cc1Cl)Cl	TCMTW49132	OVSKIKFHRZPJSS-UHFFFAOYSA-N	#N/A	#N/A	0.0122848	1
RECQL	1678	RECQL	OC(=O)CCN(=O)=O	UNPD26707	WBLZUCOIBUDNBV-UHFFFAOYSA-N	#N/A	#N/A	0.00740938	1
GPBAR1	1752	GPBAR1	CCCCCCCCCc1ccc(cc1)O	UNPD33422	IGFHQQFPSIBGKE-UHFFFAOYSA-N	#N/A	#N/A	0.0254955	1
TDP1	2019	TDP1	O=C1NC(C(C)C)C(=O)N2CCCC2C(=O)N(C)CC(=O)N(C(C(=O)OC(C1NC(=O)c1c2nc3c(ccc(c3oc2c(c(=O)c1N)C)C)C(=O)NC1C(C)OC(=O)C(C(C)C)N(C)C(=O)CN(C(=O)C2N(C(=O)C(NC1=O)C(C)C)CCC2)C)C)C(C)C)C	UNPD107452	RJURFGZVJUQBHK-UHFFFAOYSA-N	#N/A	#N/A	0.0105584	1
SENP6	2353	SENP6	COc1c(OC)ccc2c1c[n+]1CCc3c(c1c2)cc1c(c3)OCO1	UNPD32432	YBHILYKTIRIUTE-UHFFFAOYSA-N	DB04115	experimental	0.0128117	1
HRAS	2538	HRAS	CCC1(O)C(=O)OCc2c1cc1c3nc4ccccc4cc3Cn1c2=O	UNPD31943	VSJKWCGYPAHWDS-UHFFFAOYSA-N	#N/A	#N/A	0.0424969	1
HSD17B10	2775	HSD17B10	COc1cc(OC)c2c(c1)oc(=O)cc2	UNPD104780	NXJCRELRQHZBQA-UHFFFAOYSA-N	#N/A	#N/A	0.012578	1
HBB	2833	HBB	COc1c(OC)cc2c(c1OC)c1ccc(c(=O)cc1C(CC2)NC(=O)C)OC	UNPD165752	IAKHMKGGTNLKSZ-UHFFFAOYSA-N	DB01394	approved	0.0219279	1
LMNA	3017	LMNA	CCOP(=S)(Oc1cc(C)nc(n1)C(C)C)OCC	TCMTW23255	FHIVAFMUCKRCQO-UHFFFAOYSA-N	#N/A	#N/A	0.00863626	1
TSHR	3109	TSHR	O=n1ccccc1SSc1ccccn1=O	UNPD120964	ZHDBTKPXEJDTTQ-UHFFFAOYSA-N	#N/A	#N/A	0.00781081	1
RECQL	3121	RECQL	CCCC(C(=O)O)CCC	UNPD138858	NIJJYAXOARWZEE-UHFFFAOYSA-N	DB00313	approved; investigational	0.012315	1
HSD17B10	3136	HSD17B10	COC1=C(OC)C(=O)c2c(C1=O)cccc2	UNPD20594	ZEGDFCCYTFPECB-UHFFFAOYSA-N	#N/A	#N/A	0.0103861	1
SRD5A2	3840	SRD5A2	OCc1occ(c(=O)c1)O	UNPD92166	BEJNERDRQOWKJM-UHFFFAOYSA-N	DB01759	experimental	0.0243791	1
RECQL	3857	RECQL	OC(=O)C(CP(=O)(O)O)N	UNPD58468	LBTABPSJONFLPO-UHFFFAOYSA-N	#N/A	#N/A	0.00745294	1
SLC6A4	3945	SLC6A4	OC(c1ccccc1)CC1CCCC(N1C)CC(=O)c1ccccc1	UNPD131601	MXYUKLILVYORSK-UHFFFAOYSA-N	#N/A	#N/A	0.0425324	1
WEE1	3951	WEE1	CC(=CCc1c2OC(CC(=O)c2c(c(c1O)CC=C(C)C)O)c1ccc(cc1)O)C	UNPD144729	HCNLDGTUMBOHKT-UHFFFAOYSA-N	#N/A	#N/A	0.0138667	1
RECQL	4284	RECQL	CCN(C(=O)c1cccc(c1)C)CC	UNPD96143	MMOXZBCLCQITDF-UHFFFAOYSA-N	#N/A	#N/A	0.0122457	1
RECQL	4376	RECQL	CNC(C(=O)O)CC(=O)O	UNPD133883	HOKKHZGPKSLGJE-UHFFFAOYSA-N	#N/A	#N/A	0.0123035	1
NOD2	4599	NOD2	CCCCCCCCCCCC(CC1OC(=O)C1CCCCCC)OC(=O)C(CC(C)C)NC=O	UNPD50598	AHLBNYSZXLDEJQ-UHFFFAOYSA-N	#N/A	#N/A	0.00988585	1
RECQL	4687	RECQL	Cn1cnc2c1c(=O)n(c(=O)[nH]2)C	UNPD169899	QUNWUDVFRNGTCO-UHFFFAOYSA-N	#N/A	#N/A	0.00710771	1
MAPT	5102	MAPT	COc1cc2c(cc1OC)OCC1C2C(=O)c2c(O1)c1CC(Oc1cc2)C(=C)C	UNPD132520	JUVIOZPCNVVQFO-UHFFFAOYSA-N	#N/A	#N/A	0.0096327	1
F10	5153	F10	OCC1OC(C(C1O)O)n1cc(c2c1ncnc2N)C(=O)N	UNPD112652	OBZJZDHRXBKKTJ-UHFFFAOYSA-N	#N/A	#N/A	0.0185267	1
KDM6B	5312	KDM6B	OC(=O)CCC(=O)CC(=O)C	UNPD122008	WYEPBHZLDUPIOD-UHFFFAOYSA-N	#N/A	#N/A	0.0616901	1
SLC6A2	5504	SLC6A2	c1ccc(cc1)CC1=NCCN1	TCMSP2192	JIVZKJJQOZQXQB-UHFFFAOYSA-N	DB00797	approved; vet_approved	0.0105338	1
RECQL	5950	RECQL	C[C@@H](C(=O)O)N	ATCMD831	QNAYBMKLOCPYGJ-REOHCLBHSA-N	DB00160	approved; nutraceutical	0.0123553	1
LMNA	5961	LMNA	NC(=O)CC[C@@H](C(=O)O)N	TCMSP8082	ZDXPYRJPNDTMRX-VKHMYHEASA-N	DB00130	approved; investigational; nutraceutical	0.0165976	1
CHRFAM7A	6000	CHRFAM7A	COc1cc2CCN([C@@H]3c2cc1Oc1cc(ccc1O)C[C@@H]1c2c(CC[N+]1(C)C)cc(c(c2Oc1ccc(C3)cc1)O)OC)C	TCMTW54279	JFJZZMVDLULRGK-URLMMPGGSA-O	DB01199	approved	0.0409356	1
BACE1	6072	BACE1	OC[C@H]1O[C@@H](Oc2cc(O)cc(c2C(=O)CCc2ccc(cc2)O)O)[C@@H]([C@H]([C@@H]1O)O)O	TCMID7534	IOUVKUPGCMBWBT-QNDFHXLGSA-N	#N/A	#N/A	0.0204669	1
HSD17B10	6112	HSD17B10	OC(=O)CCCC[C@H]1SSCC1	ATCMD12857	AGBQKNBQESQNJD-SSDOTTSWSA-N	#N/A	#N/A	0.00770615	1
FBP1	6133	FBP1	O[C@@H]1[C@@H](COP(=O)(OP(=O)(OP(=O)(O)O)O)O)O[C@H]([C@@H]1O)n1ccc(=O)[nH]c1=O	ATCMD22173	PGAVKCOVUIYSFO-XVFCMESISA-N	#N/A	#N/A	0.0377024	1
IDO1	6780	IDO1	O=C1c2ccccc2C(=O)c2c1cccc2	UNPD156828	RZVHIXYEVGDQDX-UHFFFAOYSA-N	#N/A	#N/A	0.0359579	1
TDP1	6802	TDP1	OC[C@H]1O[C@H]([C@@H]([C@@H]1O)O)n1cnc2c1nc(N)[nH]c2=O	ATCMD9047	NYHBQMYGNKIUIF-UUOKFMHZSA-N	#N/A	#N/A	0.0185536	1
MAOB	7020	MAOB	O=c1c2ccccc2oc2c1cccc2	UNPD100013	JNELGWHKGNBSMD-UHFFFAOYSA-N	#N/A	#N/A	0.0204899	1
IDO1	7054	IDO1	O=C1C(=O)Nc2c1cccc2	UNPD8183	JXDYKVIHCLTXOP-UHFFFAOYSA-N	DB02095	experimental	0.0132807	1
RECQL	7428	RECQL	COC(=O)c1cc(O)c(c(c1)O)O	UNPD95544	FBSFWRHWHYMIOG-UHFFFAOYSA-N	#N/A	#N/A	0.0124375	1
RECQL	7455	RECQL	COC(=O)c1ccc(cc1)C	UNPD145244	QSSJZLPUHJDYKF-UHFFFAOYSA-N	#N/A	#N/A	0.012371	1
CA12	7478	CA12	COc1ccc(cc1)C(=O)O	UNPD163358	ZEYHEAKUIGZSGI-UHFFFAOYSA-N	DB02795	experimental	0.0479963	1
MAOB	7509	MAOB	SCc1ccccc1	UNPD164135	UENWRTRMUIOCKN-UHFFFAOYSA-N	#N/A	#N/A	0.0275394	1
IDO1	7969	IDO1	Sc1ccccc1	UNPD193145	RMVRSNDYEFQCLF-UHFFFAOYSA-N	#N/A	#N/A	0.00192699	1
RECQL	8438	RECQL	O=Cc1ccc2c(c1)OCO2	UNPD64754	SATCULPHIDQDRE-UHFFFAOYSA-N	#N/A	#N/A	0.0123953	1
LMNA	8468	LMNA	COc1cc(ccc1O)C(=O)O	UNPD172019	WKOLLVMJNQIZCI-UHFFFAOYSA-N	#N/A	#N/A	0.0165401	1
CA12	8499	CA12	COc1ccc(cc1)C(=O)OC	UNPD35673	DDIZAANNODHTRB-UHFFFAOYSA-N	#N/A	#N/A	0.0480054	1
RAB9A	8616	RAB9A	COc1c(oc2c1cc1ccc(=O)oc1c2)C(C)C	UNPD107215	YQBNJPACAUPNLV-UHFFFAOYSA-N	#N/A	#N/A	0.0585594	1
NPC1	8768	NPC1	O=Cc1ccc(c(c1)O)O	UNPD138745	IBGBGRVKPALMCQ-UHFFFAOYSA-N	#N/A	#N/A	0.0303464	1
RAB9A	8796	RAB9A	NC(=O)Nc1ccc(cc1)Cl	UNPD67981	RECCURWJDVZHIH-UHFFFAOYSA-N	#N/A	#N/A	0.0583136	1
GPBAR1	8814	GPBAR1	CC(c1ccc(cc1)O)(CC(C)(C)C)C	TCMID5543	ISAVYTVYFVQUDY-UHFFFAOYSA-N	#N/A	#N/A	0.0255894	1
PGD	9049	PGD	Clc1ccc(cc1)N1C(=NC(=NC1(C)C)N)N	UNPD96343	QMNFFXRFOJIOKZ-UHFFFAOYSA-N	#N/A	#N/A	0.025851	1
CASP1	9158	CASP1	c1ccc2c(c1)cc1c(c2)c2c3c1cccc3ccc2	UNPD94910	HAXBIWFMXWRORI-UHFFFAOYSA-N	#N/A	#N/A	0.024134	1
ACHE	9679	ACHE	NC(=O)c1nc[nH]c1N	UNPD19022	DVNYTAVYBRSTGK-UHFFFAOYSA-N	#N/A	#N/A	0.0224335	1
IDO1	10141	IDO1	O=C1C=CC(=O)c2c1c(O)ccc2O	UNPD126925	RQNVIKXOOKXAJQ-UHFFFAOYSA-N	#N/A	#N/A	0.0357679	1
AXL	10281	AXL	CC(C1=CC(=O)C(=CC1=O)C)C	UNPD173430	KEQHJBNSCLWCAE-UHFFFAOYSA-N	#N/A	#N/A	0.0279702	1
GLA	10439	GLA	Nc1ccccn1	UNPD191764	ICSNLGPSRYBMBD-UHFFFAOYSA-N	#N/A	#N/A	0.00455857	1
SLCO2B1	10569	SLCO2B1	CC(C1=CC2=CC[C@@H]3[C@]([C@H]2CC1)(C)CCC[C@@]3(C)C(=O)O)C	ATCMD10	RSWGJHLUYNHPMX-ONCXSQPRSA-N	#N/A	#N/A	0.0109253	1
PADI3	10687	PADI3	Cc1c(C)cccc1O	UNPD93453	QWBBPBRQALCEIZ-UHFFFAOYSA-N	#N/A	#N/A	0.0135985	1
HPGD	10729	HPGD	Oc1cnc2c(n1)nc(nc2O)N	UNPD163603	GLKCOBIIZKYKFN-UHFFFAOYSA-N	#N/A	#N/A	0.00964603	1
MAPT	11095	MAPT	Oc1cc2OC(CC(=O)c2c(c1)O)c1ccc(c(c1)O)O	UNPD127923	SBHXYTNGIZCORC-UHFFFAOYSA-N	#N/A	#N/A	0.0107222	1
MAOB	11110	MAOB	COc1cc2C=[N+](C)CCc2cc1OC	UNPD148334	AWOUIWVQSFMVNU-UHFFFAOYSA-N	#N/A	#N/A	0.0203668	1
MAPK1	11318	MAPK1	Oc1ccc2c(c1O)cccc2	UNPD90327	NXPPAOGUKPJVDI-UHFFFAOYSA-N	DB07610	experimental	0.0229022	1
CA9	13019	CA9	N#Cc1ccc(cc1)O	UNPD183015	CVNOWLNNPYYEOH-UHFFFAOYSA-N	#N/A	#N/A	0.045008	1
MAPT	15478	MAPT	O[C@H]1CC[C@]2([C@@H](C1)CC[C@@H]1[C@@H]2C[C@@H](O)[C@]2([C@]1(O)CCC2C1=CC(=O)OC1)C)C	UNPD230720	SHIBSTMRCDJXLN-KCZCNTNESA-N	#N/A	#N/A	0.0101523	1
HTR2C	16184	HTR2C	CNCCc1c[nH]c2c1cc(OC)cc2	UNPD3878	NFDDCRIHMZGWBP-UHFFFAOYSA-N	#N/A	#N/A	0.0482475	1
HTR1E	16573	HTR1E	COc1c(OC)cc2c3c1c1cc(OC)c(cc1C[C@@H]3N(CC2)C)O	ATCMD14504	ZFLRVRLYWHNAEC-AWEZNQCLSA-N	#N/A	#N/A	0.0222399	1
MAOB	16871	MAOB	COC1=CC(=O)c2c(C1=O)cccc2	UNPD106563	OBGBGHKYJAOXRR-UHFFFAOYSA-N	#N/A	#N/A	0.0277745	1
DRD4	21171	DRD4	COc1c(OC)ccc2c1CN1CCc3c([C@@H]1C2)cc1c(c3)OCO1	ATCMD20982	VZTUIEROBZXUFA-INIZCTEOSA-N	#N/A	#N/A	0.0355295	1
HTR2C	23492	HTR2C	NCCc1cn(c2c1cccc2)C	UNPD109326	CAAGZPJPCKMFBD-UHFFFAOYSA-N	#N/A	#N/A	0.04793	1
PGD	25889	PGD	NC1=NC(N(C(=N1)N)c1ccc(c(c1)Cl)Cl)(C)C	UNPD111738	FPULLBVUFHTKQQ-UHFFFAOYSA-N	#N/A	#N/A	0.0258511	1
RAB9A	26305	RAB9A	O=c1ccc2c(o1)cc1c(c2)C[C@@H](O1)C(O)(C)C	ATCMD15593	FWYSBEAFFPBAQU-GFCCVEGCSA-N	#N/A	#N/A	0.0584583	1
NOS3	28782	NOS3	NC(=N)NCCC[C@@H](C(=O)O)N	ATCMD1669	ODKSFYDXXFIFQN-BYPYZUCNSA-N	DB00125	approved; nutraceutical	0.0239372	1
ACHE	30976	ACHE	Nc1nc(N)c2c(n1)[nH]cn2	UNPD12264	MSSXOMSJDRHRMC-UHFFFAOYSA-N	#N/A	#N/A	0.0223786	1
RECQL	31368	RECQL	CC(=C)C#N	UNPD67116	GYCMBHHDWRMZGG-UHFFFAOYSA-N	#N/A	#N/A	0.0122942	1
HTR2C	31386	HTR2C	O=S(=O)(c1ccccc1)c1ccccc1	UNPD95410	KZTYYGOKRVBIMI-UHFFFAOYSA-N	#N/A	#N/A	0.0368766	1
TDP1	39378	TDP1	COc1cccc2c1oc(c2)C(=O)C	UNPD44911	MUUMFANQVPWPFY-UHFFFAOYSA-N	#N/A	#N/A	0.0108521	1
ADORA2A	51106	ADORA2A	COc1cc2c(cc1OC)CCN([C@@H]2Cc1ccc(cc1)Oc1cc(ccc1O)C[C@H]1N(C)CCc2c1cc(O)c(c2)OC)C	ATCMD4682	BURJAQFYNVMZDV-FIRIVFDPSA-N	#N/A	#N/A	0.0375799	1
USP2	63204	USP2	Clc1ccc2c(c1)c(nc(=O)[nH]2)c1ccccc1	UNPD164028	DBKIXSRJBMRMMF-UHFFFAOYSA-N	#N/A	#N/A	0.0106841	1
MAOA	64961	MAOA	c1ccc2c(c1)[nH]c1c2ccnc1	UNPD196727	AIFRHYZBTHREPW-UHFFFAOYSA-N	#N/A	#N/A	0.0115033	1
TYMS	65751	TYMS	CCCCCC(=O)Cc1cc(O)cc2c1C(=O)Oc1c(O2)c(CCCCC)c(c(c1)O)C(=O)O	UNPD11748	KVTYWHGIZSCFLG-UHFFFAOYSA-N	#N/A	#N/A	0.0549436	1
PADI3	67456	PADI3	c1ccc2c(c1)Oc1c3c2cccc3ccc1	UNPD192873	QKOSFCWXOIAFTO-UHFFFAOYSA-N	#N/A	#N/A	0.0135968	1
ANPEP	68245	ANPEP	Oc1cc(O)c2c(c1)[o+]c(c(c2)O)c1cc(O)c(c(c1)O)O	HIT083	FFNDMZIBVDSQFI-UHFFFAOYSA-N	#N/A	#N/A	0.0189003	1
EIF4G1	68262	EIF4G1	COC1=CC(=O)C=C(C1=O)OC	UNPD22348	OLBNOBQOQZRLMP-UHFFFAOYSA-N	#N/A	#N/A	0.0256356	1
ACHE	68374	ACHE	O=c1[nH]c(=O)c2c([nH]1)ncn2C	UNPD88787	PFWLFWPASULGAN-UHFFFAOYSA-N	#N/A	#N/A	0.0225065	1
POLB	69089	POLB	Cc1cc(O)c2c(n1)cccc2	UNPD178821	NWINIEGDLHHNLH-UHFFFAOYSA-N	#N/A	#N/A	0.02549	1
HTR2C	71028	HTR2C	COc1ccc2c(c1)c1CCNC(c1[nH]2)C	UNPD5675	RDUORFDQRFHYBF-UHFFFAOYSA-N	#N/A	#N/A	0.0228178	1
MAOB	72732	MAOB	O=C1C2=C(CCC(O2)(C)C)C(=O)c2c1cccc2	UNPD27800	PJWHOPKRRBUSDH-UHFFFAOYSA-N	#N/A	#N/A	0.0276676	1
MAOB	72734	MAOB	O=C1C2=C(C=CC(O2)(C)C)C(=O)c2c1cccc2	UNPD162604	OWFHAMHRUCUSRM-UHFFFAOYSA-N	#N/A	#N/A	0.0277274	1
SRD5A1	72899	SRD5A1	OC(=O)c1cc2c([nH]1)cccc2	UNPD139452	HCUARRIEZVDMPT-UHFFFAOYSA-N	#N/A	#N/A	0.0245114	1
RECQL	73057	RECQL	COc1cc2C[C@H](C)[C@H](C)Cc3c(c2c(c1OC)O)c(OC)c(c(c3)OC)OC	ATCMD8896	FYSHYFPJBONYCQ-QWHCGFSZSA-N	#N/A	#N/A	0.0123923	1
RECQL	73078	RECQL	COc1c(OC)cc2c3c1Oc1cc4c(cc1OC)CCN([C@H]4Cc1ccc(Oc4cc(C[C@@H]3N(CC2)C)ccc4OC)cc1)C	ATCMD21132	WVTKBKWTSCPRNU-KYJUHHDHSA-N	#N/A	#N/A	0.0123194	1
RECQL	75653	RECQL	CCOC(=O)c1c(C)cc(cc1O)O	UNPD53544	UQSRXQMIXSZGLA-UHFFFAOYSA-N	#N/A	#N/A	0.0123821	1
CA12	76959	CA12	COc1ccc(cc1)C(=O)N	UNPD57716	GUCPYIYFQVTFSI-UHFFFAOYSA-N	#N/A	#N/A	0.0478203	1
APEX1	77039	APEX1	CNCCc1ccc(c(c1)OC)OC	UNPD143676	HNJWKRMESUMDQE-UHFFFAOYSA-N	#N/A	#N/A	0.0283624	1
MAPT	80103	MAPT	COc1ccc2c(c1O)C(=O)c1c(C2=O)cccc1	UNPD188746	BYQWRZGQEZAOPQ-UHFFFAOYSA-N	#N/A	#N/A	0.011441	1
HSF1	82143	HSF1	Cn1c2ccccc2cc2c1c1ccccc1n2	UNPD163180	KURWKDDWCJELSV-UHFFFAOYSA-N	#N/A	#N/A	0.0280954	1
CA2	86986	CA2	NC(=O)Cc1ccc(cc1)O	UNPD183739	YBPAYPRLUDCSEY-UHFFFAOYSA-N	#N/A	#N/A	0.0368491	1
LMNA	87371	LMNA	O=C1NCCc2c1[nH]c1c2cccc1	UNPD151531	FZHZQHNKCPJTNQ-UHFFFAOYSA-N	#N/A	#N/A	0.0104439	1
IDO1	88562	IDO1	Cc1ccc2c(c1)C(=O)C(=C(C2=O)C)C	UNPD24398	LWWOWQZGAGVVEU-UHFFFAOYSA-N	#N/A	#N/A	0.013712	1
PSIP1	91458	PSIP1	OCC1=C[C@H]([C@H]2[C@@H]1[C@@H](OC=C2)O[C@@H]1O[C@H](CO)[C@H]([C@@H]([C@H]1O)O)O)O	TCMTW22640	RJWJHRPNHPHBRN-FKVJWERZSA-N	#N/A	#N/A	0.0165057	1
DRD4	91588	DRD4	C[C@@H]1NCCc2c1cc(O)c(c2)O	ATCMD19134	IBRKLUSXDYATLG-LURJTMIESA-N	#N/A	#N/A	0.0230563	1
LMNA	92136	LMNA	OC(=O)CCC[C@@H](C(=O)O)N	TCMTW25646	OYIFNHCXNCRBQI-BYPYZUCNSA-N	#N/A	#N/A	0.0166489	1
PTPN2	92900	PTPN2	COC(=O)[C@@]12CCC(C[C@H]2C2=CC[C@H]3[C@@]([C@@]2(CC1)C)(C)CC[C@@H]1[C@]3(C)CC[C@@H](C1(C)C)O)(C)C	ATCMD14588	BTXWOKJOAGWCSN-JBYJGCOVSA-N	#N/A	#N/A	0.0121378	1
STAT1	94320	STAT1	CC(=O)O[C@H]1CC[C@]2([C@H](C1(C)C)CC[C@@]1([C@@H]2C(=O)C=C2[C@@]1(C)CC[C@@]1([C@H]2C[C@](C)(CC1)C(=O)O)C)C)C	ATCMD403	FTQDJVZNPJRVPG-XWEVEMRCSA-N	#N/A	#N/A	0.0120678	1
KDM4E	94870	KDM4E	COc1cc(C)c(c(c1C)OC)C(=O)Oc1cc(C)c(c(c1C)O)C(=O)O	UNPD83303	MIJKZXWOOXIEEU-UHFFFAOYSA-N	#N/A	#N/A	0.00861376	1
MAPT	95168	MAPT	CC(=CCc1c2OC(C)(C)C=Cc2c2c(c1O)c(=O)c(co2)c1ccc(cc1)O)C	UNPD141951	DCTLJGWMHPGCOS-UHFFFAOYSA-N	#N/A	#N/A	0.0113239	1
CDK1	96710	CDK1	COc1cccc2c1cc1[nH]c(=O)c3c1c2c1OCOc1c3	UNPD133308	MXOKGWUJNGEKBH-UHFFFAOYSA-N	#N/A	#N/A	0.0452468	1
HRAS	97226	HRAS	CC[C@@]1(O)C(=O)OCc2c1cc1c3nc4ccc(cc4cc3Cn1c2=O)O	ATCMD9855	HAWSQZCWOQZXHI-FQEVSTJZSA-N	#N/A	#N/A	0.0212586	1
NPC1	99108	NPC1	CCC1CN(C)C2C(C1CC(=O)c1c(C2)c2c([nH]1)cccc2)C(=O)OC	UNPD11423	FFVRRQMGGGTQRH-UHFFFAOYSA-N	#N/A	#N/A	0.0553554	1
HSD17B10	99926	HSD17B10	COC1=CC(=O)C(=CC1=O)C(c1ccccc1)C=C	UNPD147081	RGSUZUQISVAJJF-UHFFFAOYSA-N	#N/A	#N/A	0.0148227	1
POLB	99927	POLB	COC(C1Cc2cc3cc(OC4CC(OC5CC(O)C(C(O5)C)O)C(C(O4)C)O)c(c(c3c(c2C(=O)C1OC1CC(OC2CC(OC3CC(O)C(C(O3)C)OC)C(C(O2)C)O)C(C(O1)C)O)O)O)C)C(=O)C(C(O)C)O	UNPD119336	NKGFIFLSQXHQOK-UHFFFAOYSA-N	#N/A	#N/A	0.0390633	1
KDM4E	100526	KDM4E	CC(=O)NCCc1ccc(c(c1)O)O	UNPD56857	OFSAJYZMIPNPHE-UHFFFAOYSA-N	#N/A	#N/A	0.00827187	1
TP53	100633	TP53	COc1c(oc2c(c1=O)ccc1c2cco1)c1ccccc1	UNPD126904	LKPQNZRGGNOPPU-UHFFFAOYSA-N	#N/A	#N/A	0.0072598	1
PTPN2	101761	PTPN2	OC[C@]12CC[C@@]3(C(=CC[C@H]4[C@@]3(C)CC[C@@H]3[C@]4(C)CC[C@@H](C3(C)C)O)[C@@H]2CC(CC1)(C)C)C	ATCMD7320	PSZDOEIIIJFCFE-OSQDELBUSA-N	#N/A	#N/A	0.0121533	1
CA12	102491	CA12	CCCCC(C(=O)OC)CC	UNPD16622	KICUISADAVMYCJ-UHFFFAOYSA-N	#N/A	#N/A	0.04778	1
NR3C1	107971	NR3C1	OC[C@H]1O[C@@H](Oc2ccc3c(c2)occ(c3=O)c2ccc(cc2)O)[C@@H]([C@H]([C@@H]1O)O)O	TCMTW17865	KYQZWONCHDNPDP-QNDFHXLGSA-N	DB02115	experimental	0.0171427	1
DRD4	114840	DRD4	Oc1ccc(cc1)CC1NCCc2c1cc(O)c(c2)O	UNPD123158	WZRCQWQRFZITDX-UHFFFAOYSA-N	#N/A	#N/A	0.0620467	1
MAOB	114918	MAOB	OC(=O)c1c2nc3c(oc2cc(=O)c1N)cccc3C(=O)O	UNPD62048	FSBKJYLVDRVPTK-UHFFFAOYSA-N	#N/A	#N/A	0.0275381	1
AKR1B1	119034	AKR1B1	OC[C@]1(C)[C@@H](O)[C@H](O)C[C@]2([C@H]1CC[C@@]1([C@@H]2CC=C2[C@@]1(C)CC[C@@]1([C@H]2[C@@H](C)[C@@H](CC1)C)C(=O)O)C)C	ATCMD1849	JXSVIVRDWWRQRT-UYDOISQJSA-N	#N/A	#N/A	0.05323	1
NPC1	119040	NPC1	CC([C@H]1C(=O)O[C@@H]2CCN3[C@@H]2C(=CC3)COC(=O)[C@]([C@]1(C)O)(C)O)C	ATCMD21486	SOODLZHDDSGRKL-FOOXYVKASA-N	#N/A	#N/A	0.0553789	1
GPBAR1	119205	GPBAR1	COc1cc(ccc1O)C[C@H]1C(=O)OC[C@@H]1Cc1ccc(c(c1)OC)O	ATCMD13550	MATGKVZWFZHCLI-LSDHHAIUSA-N	DB04200	experimental	0.0255172	1
G6PD	122844	G6PD	CC(=C)C1CC[C@]2([C@H]1[C@H]1CC[C@H]3[C@@]([C@]1(C)CC2)(C)CC[C@@H]1[C@]3(C)CCC(=O)C1(C)C)C(=O)O	ATCMD2333	SLJTWDNVZKIDAU-SVAFSPIFSA-N	#N/A	#N/A	0.0231191	1
G6PD	134494	G6PD	O[C@@H]1CC[C@]2([C@@H](C1)CC[C@@H]1[C@@H]2CC[C@]2([C@H]1CC[C@@H]2O)C)C	ATCMD1161	CBMYJHIOYJEBSB-GCXXXECGSA-N	#N/A	#N/A	0.0460858	1
ADRA2A	156308	ADRA2A	COc1c(OC)ccc2c1C[N+]1(C)CCc3c(C1C2)cc1c(c3)OCO1	UNPD121765	IPABSWBNWMXCHM-UHFFFAOYSA-N	#N/A	#N/A	0.0328905	1
PTPN2	157143	PTPN2	Oc1ccc(c(c1)O)[C@@H]1CC(=C[C@H]([C@H]1C(=O)c1ccc(cc1O)O)c1c(O)cc(cc1O)c1cc2c(o1)cc(cc2)O)C	TCMSP10544	WTGKDESIYCVAOP-UNTHUGQZSA-N	#N/A	#N/A	0.0120105	1
CHRM2	160492	CHRM2	COC(=O)C1=CCCNC1	UNPD196913	DYPLDWLIOGXSSE-UHFFFAOYSA-N	#N/A	#N/A	0.0418319	1
APEX1	160544	APEX1	O=c1ccc2c(o1)cc1c(c2OCC2OC2(C)C)cco1	UNPD120863	QTAGQHZOLRFCBU-UHFFFAOYSA-N	#N/A	#N/A	0.0283806	1
FYN	161924	FYN	COc1cc(ccc1O)CC(C(Cc1ccc(c(c1)OC)O)C)C	UNPD143251	ADFOLUXMYYCTRR-UHFFFAOYSA-N	#N/A	#N/A	0.0309576	1
NR3C1	165521	NR3C1	Oc1ccc(cc1)c1cc(=O)c2c(o1)cccc2O	TCMSP5422	OKRNDQLCMXUCGG-UHFFFAOYSA-N	#N/A	#N/A	0.0167535	1
XIAP	167846	XIAP	CCCCCCCCCCCCCC1=C(O)C(=O)C=C(C1=O)OC	UNPD184211	FRAFMLCDGYVHNZ-UHFFFAOYSA-N	#N/A	#N/A	0.0111674	1
HTR1E	168115	HTR1E	CCCCCCCCC[C@@H](CC(=O)CCc1ccc(c(c1)OC)O)O	ATCMD8377	AIULWNKTYPZYAN-SFHVURJKSA-N	#N/A	#N/A	0.0221988	1
XIAP	171489	XIAP	CCCCCCCCCCCC1=C(O)C(=O)C=C(C1=O)OC	UNPD182503	KHBJLRRAMCJZLZ-UHFFFAOYSA-N	#N/A	#N/A	0.0111674	1
GPBAR1	182210	GPBAR1	COc1cc(ccc1O)CC1COCC1Cc1ccc(c(c1)OC)O	UNPD187727	ROGUIJKVZZROIQ-UHFFFAOYSA-N	#N/A	#N/A	0.0255152	1
TDP1	182251	TDP1	O=c1ccc2c(o1)c(OCC1OC1(C)C)c1c(c2)cco1	UNPD70250	CTJZWFCPUDPLME-UHFFFAOYSA-N	#N/A	#N/A	0.0185727	1
ADRA1A	183528	ADRA1A	Oc1ccc2c(c1)[nH]cc2C(=O)c1ncc([nH]1)c1c[nH]c2c1ccc(c2)Br	UNPD190323	YHGQVXFIJGWOFP-UHFFFAOYSA-N	#N/A	#N/A	0.141082	1
HBB	185478	HBB	COc1cccc2c1C(=O)C=C(C2=O)C	UNPD64335	ITNOIFSYUBMQKB-UHFFFAOYSA-N	#N/A	#N/A	0.0219272	1
CACNA1H	189219	CACNA1H	O=c1c2[nH]c3ccccc3c3c2c(c2c1ccc[nH]2)ncc3	UNPD156473	BTAIBIXHXSXUFN-UHFFFAOYSA-N	#N/A	#N/A	0.0214527	1
GALE	220184	GALE	ONC(=O)Cc1ccccc1	UNPD10223	FPOQLQZHRCEVOT-UHFFFAOYSA-N	#N/A	#N/A	0.0436246	1
ADORA2A	235481	ADORA2A	OCC1OC(C(C1O)O)n1cnc2c1nc(Cl)nc2N	UNPD172693	BIXYYZIIJIXVFW-UHFFFAOYSA-N	#N/A	#N/A	0.0829304	1
MAPT	243723	MAPT	COc1cc2OCC3C(c2cc1OC)C(=O)c1c(O3)c2C=CC(Oc2cc1O)(C)C	UNPD146739	JLTNCZQNGBLBGO-UHFFFAOYSA-N	#N/A	#N/A	0.00925187	1
CLK1	247955	CLK1	OCC1OC(C(C1O)O)n1cc(c2c1ncnc2N)C#N	UNPD130271	XOKJUSAYZUAMGJ-UHFFFAOYSA-N	#N/A	#N/A	0.066592	1
LMNA	253793	LMNA	COc1cc2CCN([C@H]3c2cc1Oc1cc(ccc1O)C[C@H]1N(C)CCc2c1c(Oc1ccc(C3)cc1)c(c(c2)OC)O)C	ATCMD2186	NGZXDRGWBULKFA-VSGBNLITSA-N	#N/A	#N/A	0.016517	1
RAB9A	253955	RAB9A	COc1cc2c(cc1OC)oc1c(c2=O)cccc1	UNPD7922	FWCWUPRCWDSQEN-UHFFFAOYSA-N	#N/A	#N/A	0.0585955	1
MAPT	259632	MAPT	COc1ccc(cc1)CC(=O)c1ccc(cc1O)O	UNPD116893	XHBZOAYMBBUURD-UHFFFAOYSA-N	#N/A	#N/A	0.0112055	1
BCL2L1	266054	BCL2L1	COc1ccc(c2c1C(=O)c1ccccc1C2=O)OC	UNPD31067	HWHFKYJAAJPFQF-UHFFFAOYSA-N	#N/A	#N/A	0.0172291	1
HSD17B10	276137	HSD17B10	COc1c(O)ccc2c1CN1CCc3c(C1C2)cc1c(c3)OCO1	UNPD181658	TUTLRKKYUXPDGN-UHFFFAOYSA-N	#N/A	#N/A	0.0137599	1
SLC6A2	285225	SLC6A2	COC(=O)c1ccccc1OC(=O)c1ccccc1	UNPD44421	VFRPYBIGSSNAJS-UHFFFAOYSA-N	#N/A	#N/A	0.0772602	1
LMNA	301935	LMNA	COc1ccc2cc1Oc1ccc(cc1)CC1N(C)CCc3c1c1Oc4cc5C(C2)NCCc5cc4Oc1c(c3)OC	UNPD29798	DJAWTLHBPPQMPV-UHFFFAOYSA-N	#N/A	#N/A	0.0165145	1
TLR9	325517	TLR9	OCC12SSC3(N(C1=O)C1CC4(C(C1(C3)O)OC(=O)C)OC(C(C4=O)(C)C)C)C(=O)N2C	UNPD123564	KTAIGLOGMSQPCG-UHFFFAOYSA-N	#N/A	#N/A	0.0503904	1
NPC1	348482	NPC1	O[C@H]1CC[C@]2([C@@H](C1)CC[C@@H]1[C@@H]2CC[C@]2([C@]1(O)C[C@@H]([C@@H]2C1=CC(=O)OC1)O)C)C	ATCMD8440	PVAMXWLZJKTXFW-VQMOFDJESA-N	#N/A	#N/A	0.055481	1
MAOB	356405	MAOB	COc1c(C(=O)C)c(C)cc2c1c(O)c1c(c2)C(C)(C)C(=O)C(C1=O)(C)C	UNPD111723	BRECKZGJFRHNPM-UHFFFAOYSA-N	#N/A	#N/A	0.0275645	1
TP53	360322	TP53	C1Oc2c(O1)cc(cc2)c1ccc2c(n1)cccc2	UNPD94603	VQHLFUQPZRTKIV-UHFFFAOYSA-N	#N/A	#N/A	0.00754244	1
ALOX15	360849	ALOX15	COc1cc2CCN(C3c2cc1Oc1c2c(CCN(C2Cc2ccc(Oc4cc(C3)ccc4OC)cc2)C)cc2c1OCO2)C	UNPD195170	YVPXVXANRNDGTA-UHFFFAOYSA-N	#N/A	#N/A	0.011631	1
ADRA1D	362025	ADRA1D	CN(CCCOc1c(Br)cc(cc1Br)CCN(C)C)C	UNPD98519	LWENJEAGCYZOBC-UHFFFAOYSA-N	#N/A	#N/A	0.0245438	1
PDE2A	371187	PDE2A	COc1ccc(cc1)Cc1nccc2c1cc(OC)c(c2)OC	UNPD63902	RVTQRSDLGBOKCF-UHFFFAOYSA-N	#N/A	#N/A	0.0427323	1
WEE1	375151	WEE1	CC(=CCCC1(C)C=Cc2c(O1)c(C)cc1c2[nH]c2c1ccc(c2)O)C	UNPD104292	DWMBXHWBPZZCTN-UHFFFAOYSA-N	#N/A	#N/A	0.0276975	1
LMNA	375912	LMNA	O=c1[nH]c2ccccc2c(c1)c1ccccc1	UNPD172840	QKQNVNSIRYIHDD-UHFFFAOYSA-N	#N/A	#N/A	0.0166837	1
PTPN2	382831	PTPN2	O[C@H]1CC[C@]2([C@H](C1(C)C)CC[C@@]1([C@@H]2CC=C2[C@@]1(C)CC[C@@]1([C@H]2[C@](C)(O)[C@H](C)CC1)C(=O)O)C)C	ATCMD6161	ZZTYPLSBNNGEIS-OPAXANQDSA-N	#N/A	#N/A	0.012147	1
LMNA	430461	LMNA	NC1CC(OC(C1O)C)OC1CC(O)(Cc2c1c(O)c1c(c2O)C(=O)c2c(C1=O)c(O)ccc2)C(=O)C	UNPD113669	XREUEWVEMYWFFA-UHFFFAOYSA-N	#N/A	#N/A	0.0104692	1
CHRFAM7A	431734	CHRFAM7A	CC(=O)C1=CCCC2NC1CC2	UNPD166183	SGNXVBOIDPPRJJ-UHFFFAOYSA-N	#N/A	#N/A	0.0494401	1
RECQL	439503	RECQL	OC[C@H]1O[C@@H](Oc2ccccc2CO)[C@@H]([C@H]([C@@H]1O)O)O	TCMTW53294	NGFMICBWJRZIBI-UJPOAAIJSA-N	#N/A	#N/A	0.0123545	1
DRD4	440229	DRD4	COc1cc2CCN3[C@H](c2cc1O)Cc1c(C3)c(OC)c(cc1)OC	TCMSP694	KDFKJOFJHSVROC-INIZCTEOSA-N	#N/A	#N/A	0.0355351	1
SYK	441667	SYK	OC[C@H]1O[C@@H](Oc2cc3c(O)cc(cc3[o+]c2c2ccc(c(c2)O)O)O)[C@@H]([C@H]([C@@H]1O)O)O	TCMTW48946	RKWHWFONKJEUEF-GQUPQBGVSA-O	#N/A	#N/A	0.00783402	1
SYK	441701	SYK	Oc1cc(O)c2c(c1)O[CH+](C=C2)c1ccc(c(c1)O)O	UNPD26366	GDNIGMNXEKGFIP-UHFFFAOYSA-O	#N/A	#N/A	0.00784315	1
CHRFAM7A	442219	CHRFAM7A	CO[C@H]1C=CC2=CCN3[C@]2(C1)c1cc(OC)c(cc1CC3)OC	ATCMD7309	WXVSPYOOFCCEII-KXBFYZLASA-N	#N/A	#N/A	0.0557434	1
PTPN2	442531	PTPN2	Oc1ccc2c(c1)[C@@H]1Oc3ccccc3[C@@H]3[C@H]1c1c2c(O)cc(c1C(=O)C3)O	ATCMD15965	DBGJQYIYUBGFLT-GQIHDASDSA-N	#N/A	#N/A	0.0119747	1
RECQL	442897	RECQL	COc1c2CC(Oc2nc2c1cccc2)C(CO)(O)C	UNPD69366	NETGEQWGGLFVRL-UHFFFAOYSA-N	#N/A	#N/A	0.00740116	1
LMNA	442916	LMNA	CC(=CCc1cc(ccc1O)C(=O)C)C	UNPD156714	QJAPFSSVKIZTMR-UHFFFAOYSA-N	#N/A	#N/A	0.0165489	1
MAPT	445354	MAPT	OC/C=C(/C=C/C=C(/C=C/C1=C(C)CCCC1(C)C)\C)\C	UNPD163501	FPIPGXGPPPQFEQ-OVSJKPMPSA-N	DB00162	approved; nutraceutical; vet_approved	0.00844036	1
HSC70A	445713	HSC70A	C/C(=C\COP(=O)(OP(=O)(O)O)O)/CC/C=C(/CCC=C(C)C)\C	UNPD107456	VWFJDQUYCIWHTN-YFVJMOTDSA-N	DB07780	experimental	0.000579385	1
PTPN2	447994	PTPN2	COC(=O)c1c(OC/C=C/c2ccc(c(c2)c2onc(c2)C(=O)O)F)cccc1O	TCMID1246	QKHWJUMLYAYZFS-ONEGZZNKSA-N	DB02014	experimental	0.0119702	1
TDP1	449093	TDP1	C/C(=C\CNc1ncnc2c1nc[nH]2)/CO	UNPD26930	UZKQTCBAMSWPJD-FARCUNLSSA-N	#N/A	#N/A	0.0185123	1
GANAB	451991	GANAB	OC[C@H]1NC[C@H]([C@@H]1O)O	ATCMD5464	OQEBIHBLFRADNM-UOWFLXDJSA-N	#N/A	#N/A	0.0257409	1
TDP1	479503	TDP1	CC(=CC[C@H](C1=CC(=O)c2c(C1=O)c(O)ccc2O)O)C	ATCMD19751	NEZONWMXZKDMKF-SNVBAGLBSA-N	#N/A	#N/A	0.00868847	1
KDM4C	482190	KDM4C	CCCC(=O)c1cc2c(c(c1C)O)C(=O)C(=O)c1c2cccc1O	UNPD73202	YJQYHFMKGAVKDP-UHFFFAOYSA-N	#N/A	#N/A	0.0196407	1
PTPN2	489944	PTPN2	O[C@H]1CC[C@]2([C@H](C1(C)C)CC[C@@]1([C@@H]2CC[C@H]2[C@@]1(C)CC[C@@]1(C2=CC(C)(C)CC1)C(=O)O)C)C	ATCMD14933	RGZSSKBTFGNUCG-VNTGHVHSSA-N	#N/A	#N/A	0.0121569	1
HRAS	494163	HRAS	CCC1(O)C(=O)OCc2c1cc1c3nc4cccc(c4cc3Cn1c2=O)OC	UNPD150464	XVMZDZFTCKLZTF-UHFFFAOYSA-N	#N/A	#N/A	0.0424967	1
ADORA2A	592280	ADORA2A	COC(=O)C1=CCC2N(C1CC2)C	UNPD111413	MPSNEAHFGOEKBI-UHFFFAOYSA-N	#N/A	#N/A	0.037576	1
OPRM1	628577	OPRM1	COC1C=CC2C34C1Oc1c4c(CC2N(CC3)C)ccc1OC	UNPD45899	HGPQAWTZLJXCTC-UHFFFAOYSA-N	#N/A	#N/A	0.0594347	1
TP53	629929	TP53	CCOC(=O)c1c(C)nc(c(c1c1ccccc1)C(=O)OCC)C	UNPD79878	VQDKSJMDSZZJER-UHFFFAOYSA-N	#N/A	#N/A	0.00737077	1
CHRFAM7A	637026	CHRFAM7A	CNCCc1c2ccc(cc2[nH]c1C(C=C)(C)C)Br	UNPD87458	GQHSCJUTJKLZPX-UHFFFAOYSA-N	#N/A	#N/A	0.0688275	1
CA12	637540	CA12	OC(=O)/C=C/c1ccccc1O	UNPD115871	PMOWTIHVNWZYFI-AATRIKPKSA-N	DB01650	experimental	0.0479583	1
CA3	637759	CA3	CC(=O)/C=C/c1ccccc1	UNPD96428	BWHOZHOGCMHOBV-BQYQJAHWSA-N	#N/A	#N/A	0.0188045	1
PADI4	637796	PADI4	C/C=C/c1ccc2c(c1)OCO2	UNPD35324	VHVOLFRBFDOUSH-NSCUHMNNSA-N	#N/A	#N/A	0.0136012	1
CA12	643477	CA12	COC1=CC(=O)OC1	UNPD185097	VOYDEHILKLSVNN-UHFFFAOYSA-N	#N/A	#N/A	0.0740294	1
HSD17B10	688674	HSD17B10	COc1cc(ccc1OC)c1cc(=O)c2c(o1)cccc2	UNPD110280	ZGHORMOOTZTQFL-UHFFFAOYSA-N	#N/A	#N/A	0.00661354	1
MAPT	688679	MAPT	COc1ccc(cc1)c1cc(=O)c2c(o1)ccc(c2)O	UNPD68528	RMPRESDCJMOAHW-UHFFFAOYSA-N	#N/A	#N/A	0.00808621	1
MAPT	688715	MAPT	Oc1ccc(cc1)c1oc2ccccc2c(=O)c1O	UNPD156938	GPGOCTLAUAHUQO-UHFFFAOYSA-N	#N/A	#N/A	0.0122037	1
HSF1	688798	HSF1	Oc1cc(ccc1O)c1cc(=O)c2c(o1)c(O)c(cc2)O	UNPD153592	ARYCMKPCDNHQCL-UHFFFAOYSA-N	#N/A	#N/A	0.0280977	1
HSF1	688853	HSF1	Oc1ccc(cc1)c1cc(=O)c2c(o1)c(O)c(cc2)O	UNPD11848	HJCIUNMVLYBADX-UHFFFAOYSA-N	#N/A	#N/A	0.028098	1
RECQL	792291	RECQL	COc1ccc(cc1O)CN1CCc2c(C1)cc(c(c2)OC)OC	UNPD48803	PLFGRBPWZRSCHW-UHFFFAOYSA-N	#N/A	#N/A	0.012322	1
MAPT	883995	MAPT	O=C(c1ccc(cc1)C)/C=C/C(=O)c1ccc(cc1)C	TCMSP7686	XHTZEZLDTOKEGI-VAWYXSNFSA-N	#N/A	#N/A	0.00911856	1
PSIP1	906525	PSIP1	C/C=C(/C(=O)OC([C@H]1Oc2c(C1)cc1c(c2)oc(=O)cc1)(C)C)\C	UNPD209623	HHNCJFKRMZDTHW-WQRDJFRPSA-N	#N/A	#N/A	0.0164236	1
NISCH	1268096	NISCH	COC(=O)C1=CO[C@H]([C@H]2[C@@H]1C[C@H]1N(C2)CCc2c1[nH]c1c2cccc1)C	TCMID8759	GRTOGORTSDXSFK-BMYCAMMWSA-N	#N/A	#N/A	0.0325162	1
BCL2	1419108	BCL2	COc1ccc(c(c1)N)O	UNPD85627	TUADYTFWZPZZTP-UHFFFAOYSA-N	#N/A	#N/A	0.0410018	1
MAPT	1548912	MAPT	O=C(N1CCCCC1)/C=C\C=C/c1ccc2c(c1)OCO2	UNPD121561	MXXWOMGUGJBKIW-PORYWJCVSA-N	#N/A	#N/A	0.00909694	1
MAOB	1550140	MAOB	COC(=O)[C@H](CS)N	UNPD219908	MCYHPZGUONZRGO-VKHMYHEASA-N	#N/A	#N/A	0.0227623	1
RECQL	1550607	RECQL	C/C(=C\COc1ccc2c(c1)oc(=O)cc2)/CCC=C(C)C	UNPD22555	RSDDHGSKLOSQFK-RVDMUPIBSA-N	#N/A	#N/A	0.0123495	1
PADI3	2192542	PADI3	NC(=O)c1c[nH]c2c1cccc2	UNPD134147	LSGKMZLPZFPAIN-UHFFFAOYSA-N	#N/A	#N/A	0.0136042	1
LMNA	2837663	LMNA	COc1cc(=O)n(c2c1cccc2OCC(C(O)(C)C)O)C	UNPD2387	IUPYLWAXGAJZQC-UHFFFAOYSA-N	#N/A	#N/A	0.0165295	1
USP2	2841560	USP2	CC(CC(=O)OC1C(OC(=O)C)c2c(OC1(C)C)ccc1c2oc(=O)cc1)C	UNPD60718	ALKTVPFKDYZFGA-UHFFFAOYSA-N	#N/A	#N/A	0.0107406	1
HBB	2870897	HBB	COC(=O)c1ccc2c(c1O)C(=O)c1c(C2=O)cccc1	UNPD8360	BJKGQODYLJQOBA-UHFFFAOYSA-N	#N/A	#N/A	0.0219269	1
TDP1	3001662	TDP1	COc1cc2C[C@](C)(O)[C@@H](C)Cc3c(c2c(c1OC)OC)c(OC)c1c(c3)OCO1	ATCMD8886	ZWRRJEICIPUPHZ-MYODQAERSA-N	#N/A	#N/A	0.0186026	1
HDAC10	3084051	HDAC10	CCC[C@H]1O[C@H](CC(=O)O)CC2=C1C(=O)c1c(C2=O)cccc1O	UNPD228655	XWXZEYLPRXYHQC-TVQRCGJNSA-N	#N/A	#N/A	0.00938908	1
ADRA2A	3084440	ADRA2A	COc1cc2CC3N(C)CCc4c3c(c2cc1O)c(O)c(c4)OC	UNPD24068	PLEOQAHCVRVCDL-UHFFFAOYSA-N	#N/A	#N/A	0.0328931	1
SLCO2B1	3503223	SLCO2B1	COC(=O)c1c(C)c2Oc3c(C(=O)Oc2c(c1O)C)c(C)c(c(c3Cl)O)Cl	UNPD121090	RCLFRVZNHRFQGE-UHFFFAOYSA-N	#N/A	#N/A	0.00817263	1
PADI3	3519901	PADI3	CC(=CCc1c(O)cc2c(c1O)C(=O)CC(O2)c1ccc(cc1)O)C	UNPD18024	YHWNASRGLKJRJJ-UHFFFAOYSA-N	#N/A	#N/A	0.013598	1
POLB	3550102	POLB	OCC1OC(C(C(C1O)O)O)c1c(O)c(C2OCC(C(C2O)O)O)c2c(c1O)c(=O)cc(o2)c1ccc(cc1)O	UNPD100802	MMDUKUSNQNWVET-UHFFFAOYSA-N	#N/A	#N/A	0.0339772	1
POLB	3807559	POLB	OC(=O)C1OC(Oc2cc3oc(cc(=O)c3c(c2O)O)c2ccccc2)C(C(C1O)O)O	UNPD127245	IKIIZLYTISPENI-UHFFFAOYSA-N	#N/A	#N/A	0.014808	1
APEX1	3861164	APEX1	[O-]C(=O)C([N+](C)(C)C)Cc1c[nH]c2c1cccc2	UNPD22542	AOHCBEAZXHZMOR-UHFFFAOYSA-N	#N/A	#N/A	0.028319	1
NPC1	4136929	NPC1	COc1ccc2c(c1)nc1c(n2)cccc1OC	UNPD107240	CXHKQNZBSNIFHR-UHFFFAOYSA-N	#N/A	#N/A	0.0164676	1
LMNA	4264204	LMNA	CCC(C1OC2(C=CC(C3(O2)CCC(O3)(C)C2CCC(C(O2)C)(O)CC)O)C(CC1C)C)C(=O)C(C(C(C1OC(C(CC1C)C)C(C(=O)O)CC)C)O)C	UNPD165318	VHKXXVVRRDYCIK-UHFFFAOYSA-N	#N/A	#N/A	0.0166006	1
MAPT	4565183	MAPT	COC(=O)c1c(OC)cc2c(c1C)Oc1c(C(=O)O2)c(C)c(c(c1Cl)O)Cl	UNPD14851	RPHAAJGBADUATP-UHFFFAOYSA-N	#N/A	#N/A	0.00847164	1
TDP1	4593655	TDP1	COc1cc2oc(=O)c3c4c2c(c1CCN(C)C)ccc4cc1c3OCO1	UNPD84429	ZAVZMGKHLUNLAR-UHFFFAOYSA-N	#N/A	#N/A	0.0185691	1
XIAP	4984595	XIAP	CCCCCCCCCCCCCCCC1=C(O)C(=O)C=C(C1=O)OC	UNPD29725	LLHUGCSADCEHKM-UHFFFAOYSA-N	#N/A	#N/A	0.0111674	1
TPMT	5232424	TPMT	Nc1ccc(cc1)S(=O)(=O)O	UNPD56894	HVBSAKJJOYLTQU-UHFFFAOYSA-N	#N/A	#N/A	0.000719704	1
MCL1	5276454	MCL1	Oc1cc(O)c2c(c1)O[C@@H]([C@H](C2)OC(=O)c1cc(O)c(c(c1)O)O)c1ccc(c(c1)O)O	TCMTW24206	LSHVYAFMTMFKBA-PZJWPPBQSA-N	#N/A	#N/A	0.0754613	1
SLCO2B1	5280352	SLCO2B1	C=CC1=C(C)/C(=C/c2[nH]c(c(c2C)CCC(=O)O)Cc2[nH]c(c(c2CCC(=O)O)C)/C=C/2\NC(=O)C(=C2C=C)C)/NC1=O	UNPD120069	BPYKTIZUTYGOLE-IFADSCNNSA-N	#N/A	#N/A	0.0107705	1
CLK1	5281220	CLK1	Oc1cc2O/C(=C\c3ccc(c(c3)O)O)/C(=O)c2c(c1)O	UNPD192051	WBEFUVAYFSOUEA-PQMHYQBVSA-N	#N/A	#N/A	0.0664923	1
RECQL	5281249	RECQL	C/C(=C\C=C\C=C(\C=C\C=C(\C=C\C(=O)O)/C)/C)/C=C/C=C(/C=C/C(=O)O)\C	UNPD176805	ZVKOASAVGLETCT-UOGKPENDSA-N	#N/A	#N/A	0.0123607	1
ANPEP	5281292	ANPEP	O=C1/C(=C/c2ccc(c(c2)O)O)/Oc2c1ccc(c2O)O	UNPD24834	PNIFOHGQPKXLJE-SDQBBNPISA-N	#N/A	#N/A	0.0122015	1
HSF1	5281294	HSF1	Oc1ccc(cc1O)/C=C/C(=O)c1ccc(c(c1O)O)O	UNPD114076	GSBNFGRTUCCBTK-DAFODLJHSA-N	#N/A	#N/A	0.0280971	1
PTPN2	5281297	PTPN2	C/C(=C\Cc1c(O)cc(cc1c1oc2c(c1)ccc(c2)O)O)/CCC=C(C)C	UNPD140537	KGOOVUKZICPAIZ-FRKPEAEDSA-N	#N/A	#N/A	0.0119835	1
CLK1	5281609	CLK1	Oc1ccc(cc1)c1cc(=O)c2c(o1)c(c(cc2O)O)c1c(O)cc(c2c1oc(cc2=O)c1ccc(cc1)O)O	UNPD32554	LADPNODMUXOPRG-UHFFFAOYSA-N	#N/A	#N/A	0.0664894	1
MAOB	5281635	MAOB	Oc1cc(O)c2c(c1)oc1c(c2=O)cc(cc1)O	UNPD66130	JJUNZBRHHGLJQW-UHFFFAOYSA-N	#N/A	#N/A	0.0204115	1
MAOB	5281651	MAOB	COc1cc(O)c2c(c1)oc1c(c2=O)cccc1O	UNPD3723	IQIGECASJMDDMD-UHFFFAOYSA-N	#N/A	#N/A	0.0204027	1
MAOB	5281663	MAOB	Oc1cc(O)c2c(c1)oc1c(c2=O)cccc1O	UNPD191400	XESIWQIMUSNPRO-UHFFFAOYSA-N	#N/A	#N/A	0.0204115	1
UGT1A7	5281697	UGT1A7	Oc1ccc(cc1)c1cc(=O)c2c(o1)cc(c(c2O)O)O	UNPD159784	JVXZRQGOGOXCEC-UHFFFAOYSA-N	#N/A	#N/A	0.0354994	1
POLB	5281800	POLB	OC[C@H]1O[C@@H](OCCc2ccc(c(c2)O)O)[C@@H]([C@H]([C@@H]1OC(=O)/C=C/c1ccc(c(c1)O)O)O[C@@H]1O[C@@H](C)[C@@H]([C@H]([C@H]1O)O)O)O	UNPD213953	FBSKJMQYURKNSU-ZLSOWSIRSA-N	#N/A	#N/A	0.039146	1
PPARG	5281805	PPARG	Oc1ccc2c(c1)occ(c2=O)c1ccc2c(c1)OCO2	UNPD60496	KNJNBKINYHZUGC-UHFFFAOYSA-N	#N/A	#N/A	0.0714288	1
CLK1	5281824	CLK1	CN1CCCC1c1c(O)cc(c2c1oc(cc2=O)c1ccccc1)O	UNPD81377	YTRPTVLTUWVLKO-UHFFFAOYSA-N	#N/A	#N/A	0.0664925	1
NPC1	5282361	NPC1	Oc1ccc(cc1)/C=C/C(=O)c1ccccc1	UNPD53303	PWWCDTYUYPOAIU-DHZHZOJOSA-N	#N/A	#N/A	0.0556122	1
FYN	5284444	FYN	COc1cc(/C=C/C(=O)OCCc2ccccc2)ccc1O	UNPD188314	CZQNYPBIOHVQQN-CSKARUKUSA-N	#N/A	#N/A	0.0309767	1
WEE1	5315483	WEE1	COc1cc(/C=C/C(=O)OC2CC3C(C2(C)CC3)(C)C)ccc1O	UNPD139811	PKAIECBWQZFYRP-SOFGYWHQSA-N	#N/A	#N/A	0.0276726	1
ALOX5	5315659	ALOX5	CCCCCc1cc(O)c(c(c1)O)C/C=C(/CCC=C(C)C)\C	UNPD123879	QXACEHWTBCFNSA-SFQUDFHCSA-N	#N/A	#N/A	0.0124723	1
TRPV1	5318518	TRPV1	C/C=C/C=C/C=C/CC/C=C/C=C/C(=O)NCC(C)C	UNPD155491	KVUKDCFEXVWYBN-FMBIJHKPSA-N	#N/A	#N/A	0.0226167	1
PTPN2	5318993	PTPN2	CC(=CCc1cc2c(cc1O)OC(C2=O)(C(=O)c1ccc(c(c1)CC=C(C)C)O)c1cc(O)c(cc1/C=C/1\Oc2c(C1=O)ccc(c2CC=C(C)C)O)O)C	UNPD2528	MEJLVLSNRYLDSG-MDCVPAOJSA-N	#N/A	#N/A	0.0119687	1
CDK1	5319620	CDK1	Oc1ccc2c(c1)c1c3OCOc3cc3c1c(c2)[nH]c3=O	UNPD162080	XCYLMCOZDQCDRH-UHFFFAOYSA-N	#N/A	#N/A	0.0452473	1
PLK4	5320315	PLK4	COc1c(O)cc2c(c1O)c(=O)cc(o2)c1ccccc1	UNPD140582	LKOJGSWUMISDOF-UHFFFAOYSA-N	#N/A	#N/A	0.0243747	1
TRPV1	5321844	TRPV1	CCCCCCCCC/C=C/C=C/C(=O)NCC(O)(C)C	UNPD192516	GJDPGFHVEKFXEZ-SQIWNDBBSA-N	#N/A	#N/A	0.0225746	1
PTPN2	5324104	PTPN2	O=c1cc2n(C)ccc3c2n(c1=O)c1ccccc31	UNPD98136	YIFMSNBQADOPBX-UHFFFAOYSA-N	#N/A	#N/A	0.0120002	1
FASN	5350173	FASN	COc1ccc(cc1)c1cc(=O)oc2c1ccc(c2)O	UNPD5938	DYNGLVQFFBSENM-UHFFFAOYSA-N	#N/A	#N/A	0.0431546	1
CLK1	5352072	CLK1	CN1CCCCC1c1c(O)cc(c2c1oc(cc2=O)c1ccccc1)O	UNPD44310	BBZGOLNDVQZCIH-UHFFFAOYSA-N	#N/A	#N/A	0.0664918	1
TSHR	5353955	TSHR	CCCCCCCCCCCCC/C=C/C(C(CO)N)O	UNPD118526	WWUZIQQURGPMPG-CCEZHUSRSA-N	#N/A	#N/A	0.000551172	1
ANPEP	5354238	ANPEP	COc1cc(/C=C/C(=O)C)ccc1O	UNPD111334	AFWKBSMFXWNGRE-ONEGZZNKSA-N	#N/A	#N/A	0.0122089	1
RECQL	5355888	RECQL	COc1ccc(cc1)/C=C/C(=O)c1cc(O)ccc1O	UNPD32129	FUQGIYDZGLORRC-XBXARRHUSA-N	#N/A	#N/A	0.0123914	1
MAPT	5357218	MAPT	Oc1ccc(cc1)/C=C/C(=O)c1ccccc1O	UNPD35631	FGPJTMCJNPRZGF-JXMROGBWSA-N	#N/A	#N/A	0.0108236	1
CNR1	5364492	CNR1	CCCCCCCC/C=C\CCCCCCCC=O	UNPD145376	ZENZJGDPWWLORF-KTKRTIGZSA-N	#N/A	#N/A	0.0275268	1
MAOB	5376013	MAOB	Oc1ccc2c(c1)oc1c(c2=O)cccc1	UNPD67154	XCJHDJAODLKGLG-UHFFFAOYSA-N	#N/A	#N/A	0.0204414	1
MAOB	5376036	MAOB	Oc1cccc2c1c(=O)c1c(o2)cccc1	UNPD18461	BNLRKUSVMCIOGU-UHFFFAOYSA-N	#N/A	#N/A	0.0204046	1
HSF1	5377963	HSF1	COC(=O)c1cc2cc3C(O)CC4(Oc3c(c2c(=O)o1)O)Cc1c(O4)c(O)c2c(c1O)C(=O)C=C(C2=O)OC	UNPD110146	VGXVKHPGBHVPMW-UHFFFAOYSA-N	#N/A	#N/A	0.028111	1
HSD17B10	5378597	HSD17B10	OCC1OC(Oc2c(oc3c(c2=O)c(O)cc(c3)O)c2ccc(c(c2)O)O)C(C(C1O)O)O	UNPD120855	OVSQVDMCBVZWGM-UHFFFAOYSA-N	#N/A	#N/A	0.010345	1
NPC1	5379210	NPC1	COc1ccc(c2c1oc1c3c(OC4C3C=CO4)cc(c1c2=O)OC)O	UNPD22021	VVRUNWFPOWIBDY-UHFFFAOYSA-N	#N/A	#N/A	0.0555185	1
RECQL	5385074	RECQL	OCC1OC(C(C(C1O)O)O)c1c(O)ccc2c1occ(c2=O)c1ccc(cc1)O	UNPD49450	HKEAFJYKMMKDOR-UHFFFAOYSA-N	#N/A	#N/A	0.012371	1
HSD17B10	5393151	HSD17B10	Oc1cccc2c1c(=O)c(c(o2)c1ccccc1)O	UNPD60655	QHYWQIVTVQAKQF-UHFFFAOYSA-N	#N/A	#N/A	0.0107243	1
AURKB	5393152	AURKB	Oc1ccc2c(c1)oc(c(c2=O)O)c1ccccc1	UNPD176690	UWQJWDYDYIJWKY-UHFFFAOYSA-N	#N/A	#N/A	0.0197632	1
CDK5R1	5398649	CDK5R1	Oc1cc(O)c2c(c1)oc(=O)cc2c1ccccc1	UNPD88323	HUQKUJNSVHEHIH-UHFFFAOYSA-N	#N/A	#N/A	0.0175345	1
FABP4	5460221	FABP4	CCCCCCCC/C=C\CCCCCCCC(=O)[O-]	UNPD196283	ZQPPMHVWECSIRJ-KTKRTIGZSA-M	#N/A	#N/A	0.0379443	1
FABP4	5460332	FABP4	CCCCC/C=C\C/C=C\CCCCCCCC(=O)[O-]	UNPD169133	OYHQOLUKZRVURQ-HZJYTTRNSA-M	#N/A	#N/A	0.0379387	1
PTPN2	5467256	PTPN2	C/C(=C\Cc1c(O)ccc2c1oc(c2)c1cc(O)cc(c1CC=C(C)C)O)/CCC=C(C)C	UNPD67505	WCJPAQJEARHLGS-KEBDBYFISA-N	#N/A	#N/A	0.0119835	1
IDO1	5467625	IDO1	Clc1ccc(cc1)/C=C/1\Oc2c(C1=O)cccc2	UNPD160447	JIWJNEVCSMZRGO-ZROIWOOFSA-N	#N/A	#N/A	0.0133298	1
CLK1	5469928	CLK1	Oc1cc(O)c2c(c1C1CCCCN1)oc(cc2=O)c1ccccc1	UNPD186344	QNBKXTFSOOMMAF-UHFFFAOYSA-N	#N/A	#N/A	0.0664921	1
MAPT	5471349	MAPT	C/C(=C\COc1c2ccoc2cc2c1ccc(=O)o2)/CCC=C(C)C	UNPD123741	DBMJZOMNXBSRED-OQLLNIDSSA-N	#N/A	#N/A	0.00642405	1
ALPPL2	5473310	ALPPL2	Oc1cc(O)c2c(c1)cc(oc2=O)c1ccc(c(c1)O)O	UNPD162178	NHFGEHLUROYMEB-UHFFFAOYSA-N	#N/A	#N/A	0.044774	1
CDK5R1	5479542	CDK5R1	Oc1cc2OC(C)(C)C=Cc2c2c1c(=O)c1c([nH]2)c(O)ccc1	UNPD144489	QMIBOFBCPAGGAC-UHFFFAOYSA-N	#N/A	#N/A	0.0548785	1
MAOB	5480299	MAOB	Oc1cccc2c1oc1cccc(c1c2=O)O	UNPD80781	APIPFXZYOMIJQG-UHFFFAOYSA-N	#N/A	#N/A	0.0204046	1
ALOX15	5482101	ALOX15	COc1cc(ccc1O)c1oc2cc(O)ccc2c(=O)c1O	UNPD16236	WRFQRUBJBPLPAM-UHFFFAOYSA-N	#N/A	#N/A	0.00857541	1
MAP3K11	5482346	MAP3K11	Oc1ccc2c(c1)[nH]c1c2c2c(=O)[nH]c(=O)c2c2c1[nH]c1c2ccc(c1)O	UNPD164260	COUUDSNRXUXNDW-UHFFFAOYSA-N	#N/A	#N/A	0.0194936	1
POLB	5709318	POLB	Oc1cc(/C=C/C(=O)c2ccccc2O)ccc1O	UNPD90826	PSYVAIWGYVDYHN-FNORWQNLSA-N	#N/A	#N/A	0.0148077	1
RECQL	5802867	RECQL	OC(=O)/C=C/C1=CC2=CC(=O)C(C(=O)C2=CO1)(C)OC(=O)c1c(C)cc(cc1O)O	UNPD108575	ZJIWQCFXEQSFGR-ONEGZZNKSA-N	#N/A	#N/A	0.0123231	1
TP53	5837330	TP53	COc1cc(OC)ccc1C(=O)/C=C/c1ccccc1	UNPD169730	ZRDCNUALRUCCPA-DHZHZOJOSA-N	#N/A	#N/A	0.00748598	1
MAPT	6097621	MAPT	CC(=CCC[C@@](C1CCC(=CC1)C)(O)C)C	ATCMD6821	RGZSQWQPBWRIAQ-LOACHALJSA-N	#N/A	#N/A	0.0119064	1
RECQL	6376436	RECQL	COC(=O)/C=C/C(=C/C=C/C(=C/C=C/C=C(/C=C/C=C(/C=C/C(=O)O)\C)\C)/C)/C	UNPD61256	RAFGELQLHMBRHD-IFNPSABLSA-N	#N/A	#N/A	0.0123457	1
CNR1	6430106	CNR1	CCCCCCCC/C=C\CCCCCCC=O	UNPD13080	UZXKSNXOPFPOKK-KTKRTIGZSA-N	#N/A	#N/A	0.0275268	1
PTPN2	6437368	PTPN2	C/C(=C\CCC1=CC[C@@H](O[C@H]1O)C1=CC(=O)O[C@H]1O)/CCC1=C(C)CCCC1(C)C	UNPD228755	FGJIDQWRRLDGDB-CPIXEKRISA-N	#N/A	#N/A	0.00793726	1
RECQL	6441269	RECQL	OC[C@H]1O[C@@H](Oc2ccc(c(c2O)O)C(=O)/C=C/c2ccc(c(c2)O)O)[C@@H]([C@H]([C@@H]1O)O)O	UNPD218095	XGEYXJDOVMEJNG-HTFDPZBKSA-N	#N/A	#N/A	0.012411	1
WEE1	6441458	WEE1	OC(=O)/C=C(/CC[C@@]1(C)[C@H](C)CC[C@@]2([C@@H]1CCC=C2C)C)\C	UNPD230498	NLVMTSRTOGOFQD-MWRQYBNOSA-N	#N/A	#N/A	0.0276777	1
TDP1	6475119	TDP1	CC(=O)O[C@H]1CC[C@]2([C@H](C1(C)C)CC[C@@]1([C@@H]2CC=C2[C@@]1(C)CC[C@@]1([C@H]2[C@@H](C)[C@H](C)CC1)C(=O)O)C)C	ATCMD530	PHFUCJXOLZAQNH-OTMOLZNZSA-N	#N/A	#N/A	0.0185044	1
PRKACA	6505653	PRKACA	CCCCCCCC/C=C/CCCCCCCC(=O)OC[C@@H](OC(=O)CCCCCCC/C=C/CCCCCCCC)CO	TCMTW49525	AFSHUZFNMVJNKX-BIJVAZSDSA-N	#N/A	#N/A	0.0491043	1
WEE1	6548074	WEE1	COc1c(CC=C(C)C)cc(cc1CC=C(C)C)[C@@H]1CC(=O)c2c(O1)cc(cc2O)O	ATCMD55	JHEBMTRMMJXPTM-QHCPKHFHSA-N	#N/A	#N/A	0.0276963	1
HSD17B10	6603789	HSD17B10	O=C(/C=C\c1ccc(c(c1)O)O)OCCc1ccccc1	TCMID7390	SWUARLUWKZWEBQ-CLFYSBASSA-N	#N/A	#N/A	0.0116841	1
MAPT	6603886	MAPT	Oc1ccc(cc1)/C=C\C(=O)c1ccc(cc1O)O	TCMSP369	DXDRHHKMWQZJHT-BAQGIRSFSA-N	#N/A	#N/A	0.00873683	1
TP53	6708810	TP53	COc1ccc2c(c1)occ(c2=O)c1ccc2c(c1)OCO2	UNPD59347	PCCZMNIBWCKFBC-UHFFFAOYSA-N	#N/A	#N/A	0.00855971	1
HSD17B10	6857792	HSD17B10	C=CCCCCCCCCCCCc1ccco1	UNPD26145	KNKVJBRMGKXDGO-UHFFFAOYSA-N	#N/A	#N/A	0.0126431	1
BCL2	6918469	BCL2	COc1cc(O)c(c(c1)c1cc(O)c(cc1C)O)C(=O)O	UNPD133522	ADPBTBPPIIKLEH-UHFFFAOYSA-N	#N/A	#N/A	0.0411014	1
GRM5	6971208	GRM5	OC(=O)[C@H](c1onc(c1)O)N	TCMTW33093	IRJCBFDCFXCWGO-BYPYZUCNSA-N	#N/A	#N/A	0.0890435	1
SLC10A1	9816183	SLC10A1	CNCC(c1ccc(c2c1sc(=O)[nH]2)O)O	UNPD49613	AWWPNKWNJLNEKN-UHFFFAOYSA-N	#N/A	#N/A	0.0294593	1
CLK1	9817550	CLK1	Nc1nccc(n1)c1c2c(O)ccnc2n2c1ccnc2N	UNPD52639	RTHKPHCVZVYDFN-UHFFFAOYSA-N	DB08694	experimental	0.0031599	1
THRB	9860658	THRB	O=Cc1cc(O)c(c(c1)C(=O)c1cccc(c1O)O)C=O	UNPD81252	SZNCPOMWHKSBFW-UHFFFAOYSA-N	#N/A	#N/A	0.0121532	1
THRB	9891920	THRB	OC(=O)C/C(=C(\C(=O)O)/CCCCCCCCCCCCCCCCOS(=O)(=O)O)/C(=O)O	UNPD7517	SDWSBMKMILEYGK-VHEBQXMUSA-N	#N/A	#N/A	0.0120933	1
LMNA	9915668	LMNA	CCC(C(C(=O)NC(C(=O)NC(C(=O)C1(C)OC1)CC(C)C)C(O)C)NC(=O)C(N(C(=O)C)C)C(CC)C)C	UNPD174751	DOGIDQKFVLKMLQ-UHFFFAOYSA-N	#N/A	#N/A	0.000360425	1
PTPN2	9970370	PTPN2	C[C@H]1C[C@@H](C)c2c(C1)ccc(c2/C=C/C=C/C(=O)O)C	UNPD217983	GCHCATJQYLAKIS-UFSSINQASA-N	#N/A	#N/A	0.0119978	1
GPBAR1	9974771	GPBAR1	COc1cc(ccc1O)C[C@H]1COC[C@@H]1Cc1ccc(c(c1)OC)O	TCMTW24393	ROGUIJKVZZROIQ-HOTGVXAUSA-N	#N/A	#N/A	0.0255152	1
PTPN2	10048747	PTPN2	C=CC(c1c(O)cc(c2c1oc(c1cc(O)c(c(c1)CC=C(C)C)O)c(c2=O)O)O)(C)C	UNPD12788	XCKYBRFHABGHMT-UHFFFAOYSA-N	#N/A	#N/A	0.0119866	1
MPEG1	10110469	MPEG1	C/C(=C\CC/C(=C/Cc1cc(O)ccc1O)/C)/CCC1=C(C)CCCC1(C)C	UNPD82843	KUTRNQZRJBENDY-ZQYJZOSASA-N	#N/A	#N/A	0.0196437	1
TRPV1	10220912	TRPV1	C/C=C/C=C/C=C/CC/C=C/C(=O)NCC(O)(C)C	UNPD144178	LHFKHAVGGJJQFF-UMYNZBAMSA-N	#N/A	#N/A	0.0225069	1
PTGS2	10244247	PTGS2	CC(=CCCC1(C)C=Cc2c(O1)c(C)cc(c2)O)C	UNPD165205	OBBCGWKGCBJQIW-UHFFFAOYSA-N	#N/A	#N/A	0.0263417	1
CTSL	10244468	CTSL	O=S(Cc1ccccc1)SCc1ccccc1	UNPD57632	VUJONJHZKSZFSA-UHFFFAOYSA-N	#N/A	#N/A	0.0636735	1
CHRM3	10248541	CHRM3	NC(=N)NCCCCCCCCC(=O)C(NC(=O)C)CCCNC(=N)N	UNPD89194	OFODYLDIASSKRR-UHFFFAOYSA-N	#N/A	#N/A	0.0467502	1
PREP	10355545	PREP	C/C=C/c1ccc2c(c1)cc(o2)c1ccc(cc1O)O	UNPD81652	SDWZWUUOXFFJSA-NSCUHMNNSA-N	#N/A	#N/A	0.0368806	1
HTR1E	10378937	HTR1E	CCCCCCCC(CCc1ccc(c(c1)OC)O)O	UNPD174178	DFOMASIWHAPFEW-UHFFFAOYSA-N	#N/A	#N/A	0.0222006	1
HTR2B	10419235	HTR2B	NC(=N)Nc1cccnc1	UNPD71562	UHLKYVNSNIWKGX-UHFFFAOYSA-N	#N/A	#N/A	0.0416091	1
POLB	10429112	POLB	COC(=O)C1=CO[C@H]([C@H]2[C@@H]1C[C@@H]1N(C2)CC[C@@]21C(=O)Nc1c2cccc1)C	ATCMD18055	JMIAZDVHNCCPDM-QLMFUGSGSA-N	#N/A	#N/A	0.0255195	1
PTPN2	10600994	PTPN2	OC[C@@]1(C)C(=O)CC[C@]2([C@H]1CC[C@@]1([C@@H]2CC=C2[C@@]1(C)CC[C@@]1([C@H]2[C@](C)(O)[C@@H](CC1)C)C(=O)O)C)C	ATCMD6163	DICFMPCEXYENLE-OGHVSZAPSA-N	#N/A	#N/A	0.0121246	1
KAT2B	11135781	KAT2B	CC(=CC[C@]12C(=O)C(=C3[C@@](C1=O)(C[C@@H](C(O3)(C)C)CC=C(C)C)C[C@H](C2(C)C)CC=C(C)C)C(=O)c1ccc(c(c1)O)O)C	TCMID6664	KXTNVBQRLRYVCO-LPSZMIQCSA-N	#N/A	#N/A	0.114196	1
CA2	11172019	CA2	NC1=N/C(=C\c2ccc(c(c2)O)O)/C(=O)N1	UNPD71835	IBUXMZQNAQOLQY-UTCJRWHESA-N	#N/A	#N/A	0.036791	1
JAK3	11232674	JAK3	Oc1ccc2c(c1)[nH]c1c2c2C(=O)NCc2c2c1[nH]c1c2cccc1	UNPD67508	GMSWOSYARKHCHX-UHFFFAOYSA-N	#N/A	#N/A	0.0195014	1
mlk-1	11268312	mlk-1	Oc1cc2c(cc1O)[nH]c1c2c2c(=O)[nH]c(=O)c2c2c1[nH]c1c2cccc1	UNPD142562	BJIPXXAEQIWODL-UHFFFAOYSA-N	#N/A	#N/A	0.0194942	1
PSIP1	11436940	PSIP1	O=c1ccc2c(o1)c1c(cc2)OC([C@H]([C@@H]1O)O)(C)C	TCMID4721	HKXQUNNSKMWIKJ-YPMHNXCESA-N	#N/A	#N/A	0.0164187	1
PTPN2	11455599	PTPN2	Brc1c(Cc2cc(O)c(c(c2Br)Br)O)cc(c(c1Br)O)O	UNPD92558	WIAKRAUTQVUHHL-UHFFFAOYSA-N	#N/A	#N/A	0.0119516	1
CA2	11602375	CA2	COc1cc(ccc1O)C[C@H]([C@@H](Cc1ccc(c(c1)OC)O)C)C	ATCMD5612	ADFOLUXMYYCTRR-ZIAGYGMSSA-N	#N/A	#N/A	0.0367676	1
PTPN2	11740841	PTPN2	COc1cc(O)c2c3c1c1c(O)cccc1[C@H]1[C@H]3[C@H](CC2=O)c2c(O1)cccc2	ATCMD15966	ZVFNSNHXUYAPTP-VVTWNTARSA-N	#N/A	#N/A	0.011974	1
ADRA1D	11772257	ADRA1D	CN[C@H]1CC[C@]2(C(=CC[C@@H]3[C@@H]2CC[C@]24[C@H]3CC[C@@H]4[C@@H](N(C2)C)C)C1)C	TCMID8598	UBWOPONWVXRTKE-ALCLCTQTSA-N	#N/A	#N/A	0.0243511	1
RECQL	11862171	RECQL	OC(=O)[C@@H]1CCN1	ATCMD2052	IADUEWIQBXOCDZ-VKHMYHEASA-N	#N/A	#N/A	0.00738567	1
BCL2	11957301	BCL2	COc1cc2c(cc1O)C[C@@H]1c3c2c2OCOc2cc3CCN1	TCMID910	VYJUHRAQPIBWNV-GFCCVEGCSA-N	#N/A	#N/A	0.0205533	1
PTPN2	12051847	PTPN2	CC(=CCc1cc(ccc1O)c1coc2c(c1=O)ccc(c2CC=C(C)C)O)C	UNPD4392	YBJJPNXZVZRDIU-UHFFFAOYSA-N	#N/A	#N/A	0.0119752	1
HTR1E	12304178	HTR1E	CN1[C@H]2Cc3c([C@@H]1Cc1c2cc2OCOc2c1)cc1c(c3)OCO1	TCMTW27909	PGINMPJZCWDQNT-GJZGRUSLSA-N	#N/A	#N/A	0.0222333	1
PTPN2	12313704	PTPN2	OC(=O)[C@]12CC[C@@]3(C(=CC[C@H]4[C@@]3(C)CC[C@@H]3[C@]4(C)CCC(=O)C3(C)C)[C@@H]2CC(CC1)(C)C)C	ATCMD16348	FMIMFCRXYXVFTA-FUAOEXFOSA-N	#N/A	#N/A	0.0121443	1
USP2	12315418	USP2	CCC(/C=C(/C=C/C1=CC2=C(Cl)C(=O)C(C(=O)C2=CO1)(C)OC(=O)C)\C)C	UNPD155886	SWJLTKXURNHVHE-NJHPPEEMSA-N	#N/A	#N/A	0.0107216	1
BARD1	12542182	BARD1	COc1cccc(cc1=O)C(C)C	UNPD30740	DNORQMNGHAZBGW-UHFFFAOYSA-N	#N/A	#N/A	0.0569601	1
TDP1	13647412	TDP1	OCC1OC(Oc2c(oc3c(c2=O)c(O)cc(c3)O)c2ccc(cc2)O)C(C(C1O)O)OC1OC(CO)C(C(C1O)O)O	UNPD115530	LKZDFKLGDGSGEO-UHFFFAOYSA-N	#N/A	#N/A	0.0186005	1
ROCK2	14037821	ROCK2	COc1cc(CCNC(=O)C=C(C)C)c2c3c1nccc3c1c([nH]2)cccc1	UNPD113565	VSRXTBXYVFEZKB-UHFFFAOYSA-N	#N/A	#N/A	0.0214526	1
TRPV1	14135316	TRPV1	C/C=C/C=C/C=C/CC/C=C/C=C/C(=O)NCC(O)(C)C	UNPD163288	CRPPMKFSMRODIQ-FMBIJHKPSA-N	#N/A	#N/A	0.0225069	1
TRPV1	14135317	TRPV1	C/C=C/C=C/C=C\CC/C=C/C=C/C(=O)NCC(O)(C)C	UNPD175042	CRPPMKFSMRODIQ-JDXPBYPHSA-N	#N/A	#N/A	0.0225069	1
TRPV1	14135320	TRPV1	CC/C=C/C/C=C\CC/C=C/C=C/C(=O)NCC(O)(C)C	UNPD117038	HSFPMLIZJAVYHM-NPNWTSAVSA-N	#N/A	#N/A	0.0225125	1
KDM4E	14137704	KDM4E	O=CC1C(O)C(C2C1(C)C1CCC3C(C1(CC2)C)(C)CCC1(C3C(CC1)C(=C)C)C(=O)O)(C)C	UNPD122991	SLWJVQQNDGLXTK-UHFFFAOYSA-N	#N/A	#N/A	0.00849758	1
HRAS	14440698	HRAS	OCCC1(O)C(=O)OCc2c1cc1c3nc4ccccc4cc3Cn1c2=O	UNPD37171	CCBXXGSAGQNXHX-UHFFFAOYSA-N	#N/A	#N/A	0.0424968	1
MAOB	14446221	MAOB	NC1=N/C(=C\c2c[nH]c3c2cccc3)/C(=O)N1C	UNPD94102	INBAJENOTNXSTK-WDZFZDKYSA-N	#N/A	#N/A	0.020592	1
IDO1	14446223	IDO1	Brc1ccc2c(c1)[nH]cc2/C=C/1\N=C(N(C1=O)C)N	UNPD45940	AKOYYWJWILIASW-WCIBSUBMSA-N	#N/A	#N/A	0.0131328	1
MAOB	14446224	MAOB	CNC1=N/C(=C\c2c[nH]c3c2cccc3)/C(=O)N1C	UNPD161109	JYSZFLKTAHSXMS-GHXNOFRVSA-N	#N/A	#N/A	0.0205846	1
MAOB	14446226	MAOB	CNC1=N/C(=C\c2c[nH]c3c2ccc(c3)Br)/C(=O)N1C	UNPD77954	WIJJEZADZQGDSE-XGICHPGQSA-N	#N/A	#N/A	0.0205879	1
HDAC10	14604081	HDAC10	CC(=CCc1c(O)cc2c(c1O)c(=O)cc(o2)c1ccc(c(c1)O)O)C	UNPD42929	AFJYQKPCJLMHCC-UHFFFAOYSA-N	#N/A	#N/A	0.00939273	1
TP53	14704104	TP53	COc1ccc(cc1)C(=O)OCCc1ccc(cc1)O	UNPD54291	DSMAYKYXHOGICG-UHFFFAOYSA-N	#N/A	#N/A	0.0084665	1
CA2	15038375	CA2	NC(=O)Cc1ccc(c(c1)Cl)O	UNPD158133	ORFVLZDPZCEXSD-UHFFFAOYSA-N	#N/A	#N/A	0.0368867	1
GRIK5	15347044	GRIK5	CC/C=C(\C(=O)O)/C[C@@H](C(=O)O)N	UNPD226335	WKTPEUFZYFCNLY-LMXCLXGDSA-N	#N/A	#N/A	0.0372395	1
PTPN2	15560128	PTPN2	O[C@H]1C[C@@]2(C)[C@H](C([C@H]1O)(C)C)CC[C@@]1([C@@H]2CC=C2[C@@]1(C)CC[C@@]1([C@H]2CC(C)(C)CC1)C(=O)O)C	ATCMD10521	MDZKJHQSJHYOHJ-KRGADYIYSA-N	#N/A	#N/A	0.0121531	1
MAOB	16059787	MAOB	COC(=O)C1(O)OC(C2=C1C(=O)c1c(C2=O)cc(c(c1O)CC)C)(C)C	UNPD44732	YRVWWGFREKZPIN-UHFFFAOYSA-N	#N/A	#N/A	0.0276329	1
MAOB	16091658	MAOB	COC(=O)C1(OC)OC(C2=C1C(=O)c1c(C2=O)cc(c(c1O)CC)C)(C)C	UNPD8638	DSYKJFFQHNSURC-UHFFFAOYSA-N	#N/A	#N/A	0.027638	1
USP2	16196966	USP2	OCC1(C)C(CCC2(C1CCC1(C2CC=C2C1(C)CCC1(C2CC(CC1)(C)C)C(=O)O)C)C)OC1OCC(C(C1OC1OC(C)C(C(C1O)OC1OCC(C(C1O)OC(=O)C)OC(=O)C)O)O)O	UNPD132681	YWTUZIXCNQDLDQ-UHFFFAOYSA-N	#N/A	#N/A	0.0107195	1
PTPN2	16664188	PTPN2	OCc1ccc(c(c1C#Cc1ccc(cc1)O)/C(=C/1\C=CC(=O)C=C1)/c1ccc(cc1)O)c1ccc(cc1)O	UNPD38689	SJSFYXIEVFIZJC-UHFFFAOYSA-N	#N/A	#N/A	0.0119681	1
POLB	16745399	POLB	OCC1OC(Oc2c(oc3c(c2=O)c(O)cc(c3)O)c2ccc(c(c2)O)O)C(C(C1O)O)OC1OC(CO)C(C(C1OC1OC(CO)C(C(C1O)O)O)O)O	UNPD111801	IQBMWEYFKNVACH-UHFFFAOYSA-N	#N/A	#N/A	0.0340226	1
POLB	16745402	POLB	COC(=O)C1(Cc2ccc(cc2)O)OC(=O)C(=C1c1ccc(cc1)O)O	UNPD135742	AEKPZNDJHWFONI-UHFFFAOYSA-N	#N/A	#N/A	0.0256265	1
HDAC10	21147597	HDAC10	CC(=CCc1c(O)cc(c2c1oc(cc2=O)c1ccc(c(c1)O)O)O)C	UNPD10885	WLZYCSNLBZYEHT-UHFFFAOYSA-N	#N/A	#N/A	0.00939273	1
MAOB	21609882	MAOB	CCCc1c(C(=O)OC)c(OC)cc2c1c(O)c1c(c2)C(C)(C)C(=O)C(C1=O)(C)O	UNPD43930	PRAZMVBMBFPZFN-UHFFFAOYSA-N	#N/A	#N/A	0.0275489	1
PTPN2	21778115	PTPN2	Brc1c(Cc2c(Br)c(O)c(c(c2Br)Br)O)c(Br)c(c(c1O)O)Br	UNPD183545	AMKNSMNMEAMKDN-UHFFFAOYSA-N	#N/A	#N/A	0.0119498	1
HRAS	23442826	HRAS	OCC1OC(C(C(C1O)O)O)n1c2c3[nH]c4c(c3c3c(c2c2c1ccc(c2)F)c(=O)[nH]c3=O)cc(cc4)F	UNPD102078	YQUUXCMYRDQFPL-UHFFFAOYSA-N	#N/A	#N/A	0.0424974	1
PTPN2	24178900	PTPN2	Oc1cc(Oc2ccc(cc2O)c2ccc(c(c2)O)O)c2c(c1)c1cc(O)c(cc1o2)C(=O)O	UNPD122618	VRTKLDOVWDISRQ-UHFFFAOYSA-N	#N/A	#N/A	0.0119643	1
PTPN2	24178901	PTPN2	Oc1cc(Oc2ccc(cc2O)c2ccc(c(c2)O)OS(=O)(=O)O)c2c(c1)c1cc(O)c(cc1o2)C(=O)O	UNPD115078	FRUOIAVWHGWBQO-UHFFFAOYSA-N	#N/A	#N/A	0.0119593	1
RGS8	24881875	RGS8	NC(=N)NCCCCNC(=O)Oc1c(Br)cc(c(c1Br)CC(=O)O)O	UNPD93138	XFAYUCCPAGOBFN-UHFFFAOYSA-N	#N/A	#N/A	0.0280739	1
RECQL	25244048	RECQL	NC1C=CC=C(C1)C(=O)O	UNPD7100	KFNRJXCQEJIBER-UHFFFAOYSA-N	#N/A	#N/A	0.0123149	1
PTPN2	44188089	PTPN2	CCCCCc1cc(O)cc(c1Oc1cc(OC)cc2c1C(=O)OC2(OC)CCCC)O	UNPD46576	SIFVKFNQJLVAOD-UHFFFAOYSA-N	#N/A	#N/A	0.0119755	1
PTPN2	44188090	PTPN2	CCCCCc1c(Oc2cc(OC)cc3c2C(=O)OC3(OC)CCCC)c(O)cc(c1C(=O)O)O	UNPD127600	RVLAGCKOEKBSNY-UHFFFAOYSA-N	#N/A	#N/A	0.0119781	1
ANPEP	44258702	ANPEP	COc1c(oc2c(c1=O)ccc(c2O)O)c1ccc(c(c1)O)O	UNPD51312	WGIWCQHSJILTOY-UHFFFAOYSA-N	#N/A	#N/A	0.0122011	1
LMNA	44266427	LMNA	O=C1O[C@@H]2O[C@]3(C)CC[C@@H]4C2([C@H]([C@H]1C)CC[C@H]4C)OO3	TCMID9649	BLUAFEHZUWYNDE-XRNKLDBLSA-N	#N/A	#N/A	0.0165383	1
HRAS	44324236	HRAS	CCC1(O)C(=O)OCc2c1cc1c3nc4ccc5c(c4cc3Cn1c2=O)OCO5	UNPD158368	OIWIDLBKGFKTHJ-UHFFFAOYSA-N	#N/A	#N/A	0.0424962	1
PTPN2	44408701	PTPN2	CC(=CCCC1=C[C@H](c2c(O)cc3c(c2O)C(=O)C[C@H](O3)c2cc(O)ccc2O)[C@H]([C@@H](C1)c1ccc(cc1O)O)C(=O)c1ccc(cc1O)O)C	TCMID6149	ZXTQHAMOONDJDJ-YTAXAHCSSA-N	#N/A	#N/A	0.0120061	1
HRAS	44567153	HRAS	CCCCCCCCCCCCCCCCC/C=C\CC/C=C\CCCC(=O)O	UNPD7187	QHCUSXRHMXVISV-ZCIBKELESA-N	#N/A	#N/A	0.0424824	1
HTR1E	44575219	HTR1E	COc1cc2C[C@@H]3N([C@H](c2cc1O)Cc1c3cc2OCOc2c1)C	TCMTW27274	TZJNFQHUSMXCIT-GJZGRUSLSA-N	#N/A	#N/A	0.0222314	1
PDE6A	44587252	PDE6A	COc1ccc(cc1)c1oc2c(CC=C(C)C)c(O)cc(c2c(=O)c1O[C@@H]1O[C@H](C)[C@H]([C@@H]([C@@H]1O)O)O)O	TCMID10037	NGMYNFJANBHLKA-XAPMVYOVSA-N	#N/A	#N/A	0.0144102	1
PTPN2	45273151	PTPN2	C/C(=C/Cc1c(O)cc(cc1c1oc2c(c1)ccc(c2)O)O)/CC/C=C(\CCC=C(C)C)/C	TCMID6566	YUFBSQFJPYHMTK-QUYCRGELSA-N	#N/A	#N/A	0.0119835	1
PTPN2	45485201	PTPN2	CC(=CCc1c(O)cc(cc1O)C(=O)[C@H]1[C@H](C=C(C[C@@H]1c1ccc(cc1O)O)C)c1c(O)ccc(c1O)C(=O)/C=C/c1ccc(cc1O)O)C	UNPD224614	BDUDECZOBBDZCJ-CQZGAYFHSA-N	#N/A	#N/A	0.012003	1
PTPN2	45485202	PTPN2	CC(=CCc1c(O)cc(cc1O)C(=O)[C@H]1[C@H](C=C(C[C@@H]1c1ccc(cc1O)O)C)c1c(O)ccc(c1O)C(=O)/C=C/c1ccc(cc1)O)C	UNPD222484	PXFKYAIDSYKIJA-DLBCFTNOSA-N	#N/A	#N/A	0.0120019	1
PTPN2	46934435	PTPN2	COc1c(CC=C(C)C)c(O)cc(c1c1oc2c(c1C)ccc(c2)O)O	UNPD76754	OEIIVGQLDAYZNT-UHFFFAOYSA-N	#N/A	#N/A	0.0119606	1
PTPN2	50908843	PTPN2	COc1c(OC)cc(c(c1Br)Br)C(=O)c1c(Br)c(Br)c(c(c1Br)OC)OC	UNPD44295	GXRNTNZGKHIUAC-UHFFFAOYSA-N	#N/A	#N/A	0.011949	1
CDK5R1	50993749	CDK5R1	Oc1ccc(cc1)CC1=C(C(=O)OC1)c1ccc(cc1)O	UNPD64558	ULAOSFXVLZDDJW-UHFFFAOYSA-N	#N/A	#N/A	0.0174381	1
CDK5R1	50993750	CDK5R1	Oc1ccc(cc1)C1=C(COC1=O)Cc1ccc(c(c1)O)O	UNPD72952	BIFVRZJCZAIDEH-UHFFFAOYSA-N	#N/A	#N/A	0.0174492	1
CDK5R1	50993751	CDK5R1	Oc1ccc(cc1)CC1=C(C(=O)OC1)c1cc(O)cc(c1)O	UNPD138327	QHJKSEDOBYAWIB-UHFFFAOYSA-N	#N/A	#N/A	0.0174348	1
CDK5R1	50993752	CDK5R1	Oc1cc(O)cc(c1)C1=C(COC1=O)Cc1ccc(c(c1)O)O	UNPD145657	BMROQCPWMNUZGZ-UHFFFAOYSA-N	#N/A	#N/A	0.0174409	1
RECQL	51377238	RECQL	OC(=O)[C@@H](CC(=O)c1cccc(c1N)O)N	TCMID7850	VCKPUUFAIGNJHC-ZCFIWIBFSA-N	#N/A	#N/A	0.0123582	1
PREP	53483951	PREP	C/C=C/c1ccc2c(c1)cc(o2)c1ccc(cc1)O	UNPD145240	OAMUEWCGJSSPRS-NSCUHMNNSA-N	#N/A	#N/A	0.0369079	1
ALOX5	54669855	ALOX5	CCCCCc1cc(O)c(c(c1)O)C/C=C(/CC/C=C(/CCC=C(C)C)\C)\C	UNPD203404	WYEFRBILENQYOH-CZHHEZJISA-N	#N/A	#N/A	0.0124723	1
CA3	54675757	CA3	Oc1cc(C)oc(=O)c1	UNPD51407	NSYSSMYQPLSPOD-UHFFFAOYSA-N	#N/A	#N/A	0.0188096	1
KDM4E	54677407	KDM4E	COc1c2C=CC(Oc2cc2c1c(O)c(c(=O)o2)c1ccc(cc1)OC)(C)C	UNPD13145	MBZKDBQDALOSRP-UHFFFAOYSA-N	#N/A	#N/A	0.00943716	1
USP2	54677920	USP2	COC1C(OC(=O)c2ccc([nH]2)C)C(O)C(OC1(C)C)Oc1ccc2c(c1Cl)oc(=O)c(c2O)NC(=O)c1ccc(c(c1)CC=C(C)C)O	UNPD63692	FJAQNRBDVKIIKK-UHFFFAOYSA-N	#N/A	#N/A	0.0107327	1
PTPN2	54689623	PTPN2	Oc1cc(c(cc1O)/C=C/c1oc(=O)c2c(c1)oc(=O)c1c2cc(O)c(c1)O)c1c(O)cc(oc1=O)/C=C/c1ccc(c(c1)O)O	UNPD30358	ZNLSHKJBXWCRKW-CLLRDSTBSA-N	#N/A	#N/A	0.0119701	1
HTR2C	54764241	HTR2C	C/C=C/1\C[C@@H]2N(C1)C(=O)c1c(NC2)c(OC)ccc1	UNPD223705	YZASJELCRXLHII-LFJXOHPOSA-N	#N/A	#N/A	0.0445085	1
PTPN2	60155760	PTPN2	OC[C@]12CC[C@@]3([C@]([C@H]2C(=O)C[C@H]1C(C)C)(C)CC=C1[C@H]3[C@@H](O)CC2=C1CC[C@@H](C2(C)C)O)C	UNPD227226	TXMNDMNAVIQEEQ-GJBPHGMYSA-N	#N/A	#N/A	0.0121137	1
TRPV1	68742556	TRPV1	CCCCC/C=C\C/C=C\CCCCCCCC(=O)NCc1ccccc1	UNPD230480	YJWLCIANOBCQGW-HZJYTTRNSA-N	#N/A	#N/A	0.0175491	1
PTPN2	70684863	PTPN2	OC[C@]1(C)[C@@H](O)CC[C@]2([C@H]1CC[C@@]1([C@@H]2CC=C2[C@@]1(C)CC[C@@]1([C@H]2[C@@H](C)C(=C)CC1)C(=O)O)C)C	UNPD225101	VYCXQYVHRGJDEW-RXIXQDTDSA-N	#N/A	#N/A	0.0121462	1
DRD4	71261649	DRD4	COc1cc2CCN3[C@@H](c2cc1O)Cc1c(C3)c(OC)c(cc1)OC	ATCMD11311	KDFKJOFJHSVROC-MRXNPFEDSA-N	#N/A	#N/A	0.0355351	1
PTPN2	71454955	PTPN2	COc1ccc(cc1CC=C(C)C)[C@H]1COc2c(C1=O)c(O)cc(c2)O	UNPD218824	MGSNGDMLFQANLV-MRXNPFEDSA-N	#N/A	#N/A	0.0119737	1
CTSL	71458275	CTSL	NCCCC[C@@H](N(C(=O)[C@@H]1C[C@@H](CN1C(=O)[C@H](NC(=O)[C@@H](Cc1ccc(cc1)O)O)CCc1ccc(cc1)O)C)C)C(=O)O	UNPD223056	GYOYQEPTCVDBLP-FTNGLENOSA-N	#N/A	#N/A	0.0633768	1
PTPN2	71575995	PTPN2	COc1ccc(cc1)/C(=C\1/C=CC(=O)C=C1)/c1c(C#Cc2ccc(cc2)O)c(CO)ccc1c1ccc(cc1)O	UNPD220978	LPEPBNUNFHGLSZ-UHFFFAOYSA-N	#N/A	#N/A	0.0119694	1
PTPN2	71717335	PTPN2	CC(=C[C@@H]1OC(=O)[C@](C1)(O)[C@H]1CC[C@@]2([C@@H]1CC[C@H]1[C@@]2(C)CC[C@@H]2[C@]1(C)CC[C@@H](C2(C)C)O)C)C	UNPD229519	UVWSKJGMKBMOEV-NYBHINJWSA-N	#N/A	#N/A	0.0120816	1
NOX4	75297028	NOX4	CCCCCC(=O)NC(C(=O)NC1C(C)OC(=O)C(NC(=O)C(Cc2ccc(cc2)O)N(C)C(=O)C(N2C(=O)C(NC(=O)C(NC1=O)CCCNC(=N)N)CCC2O)Cc1ccccc1)C(C)C)CCC(=O)O	UNPD40418	NYXUAFLMUQAJPS-UHFFFAOYSA-N	#N/A	#N/A	0.0398573	1
MAOB	88113319	MAOB	OC(=O)C(CC(=O)O)(CC(=O)O)O	UNPD145647	KRKNYBCHXYNGOX-UHFFFAOYSA-N	DB04272	nutraceutical; vet_approved	0.0339675	1
PTPN2	102331593	PTPN2	C[C@H]1C[C@@H](C)[C@H]2C(C1)C=C[C@@H]([C@@H]2/C=C/C=C/C(=O)O)C	UNPD226386	DUGGXGNWQZWAAS-RAJPTAFASA-N	#N/A	#N/A	0.0120532	1
TRPV1	118707905	TRPV1	CCC/C=C\C#C/C=C\C=C\CC/C=C/C=C/C(=O)NCC(C)C	UNPD33008	UZBWCKBPXRODJT-UFDOCAHHSA-N	#N/A	#N/A	0.0226087	1
NR1H2	128861|68247	NR1H2	Oc1cc(O)c2c(c1)[o+]c(c(c2)O)c1ccc(c(c1)O)O	HIT082|UNPD184013	COAWNPJQKJEHPG-UHFFFAOYSA-N|VEVZSMAEJFVWIL-UHFFFAOYSA-O	#N/A	#N/A	0.0688263	1
LMNA	3628|72332	LMNA	COC(=O)CC(C(=O)OC1C(=CC23C1c1cc4OCOc4cc1CCN3CCC2)OC)(CCCC(O)(C)C)O	HIT081|UNPD100403	HYFHYPWGAURHIV-UHFFFAOYSA-N|HYFHYPWGAURHIV-ZEDNPHJLSA-N	DB04865	approved	0.016523	1
MAPT	178	MAPT	CC(=O)N	UNPD184584	DLFVBJFMPXGRIB-UHFFFAOYSA-N	DB02736	experimental	0.00850349	1
CA9	338	CA9	OC(=O)c1ccccc1O	UNPD59192	YGSDEFSMJLZEOE-UHFFFAOYSA-N	DB00936	approved; vet_approved	0.0540555	1
APEX1	341	APEX1	O=C(c1cc(O)c(c(c1)O)O)Oc1cc(cc(c1O)O)C(=O)O	UNPD167398	COVFEVWNJUOYRL-UHFFFAOYSA-N	#N/A	#N/A	0.0143756	1
CA12	403	CA12	Nc1ccc(cc1)O	UNPD182132	PLIKAWJENQZMHA-UHFFFAOYSA-N	#N/A	#N/A	0.023757	1
HBB	764	HBB	Nc1nc2nc[nH]c2c(=O)[nH]1	UNPD47403	UYTPUPDQBNUYGX-UHFFFAOYSA-N	#N/A	#N/A	0.0188492	1
ALOX15	1066	ALOX15	OC(=O)c1ncccc1C(=O)O	UNPD66873	GJAWHXHKYYXBSV-UHFFFAOYSA-N	DB01796	experimental	0.00718128	1
PRKACA	1288	PRKACA	OCC1NC(=O)C(C(C)C)N(c2c3c(C1)c[nH]c3ccc2)C	UNPD141280	LUZOFMGZMUZSSK-UHFFFAOYSA-N	#N/A	#N/A	0.0285387	1
APEX1	2022	APEX1	Nc1nc(=O)c2c([nH]1)n(COCCO)cn2	TCMID7209	MKUXAQIIEYXACX-UHFFFAOYSA-N	DB00787	approved	0.0104809	1
HPGD	2596	HPGD	CNC1=C(Br)C(=O)c2c(C1=O)cncc2	UNPD190653	YZQJGPPACTZUKY-UHFFFAOYSA-N	#N/A	#N/A	0.0123104	1
SYK	2948	SYK	COc1c2C(=O)c3ccccc3C(=O)c2cc(c1C=O)O	UNPD206	IPDMWUNUULAXLU-UHFFFAOYSA-N	#N/A	#N/A	0.0114119	1
HTR2A	3250	HTR2A	OCC(NC(=O)C1CN(C)C2C(=C1)c1cccc3c1c(C2)c[nH]3)C	UNPD123009	WVVSZNPYNCNODU-UHFFFAOYSA-N	#N/A	#N/A	0.0186704	1
ABCC1	3278	ABCC1	CCC(=C)C(=O)c1ccc(c(c1Cl)Cl)OCC(=O)O	TCMSP6202	AVOLMBLBETYQHX-UHFFFAOYSA-N	DB00903	approved	0.00994074	1
LMNA	3413	LMNA	C=CC1(C)CC(=O)C2(C(O1)(C)C(OC(=O)C)C(C1C2(C)C(O)CCC1(C)C)O)O	UNPD118560	OHCQJHSOBUTRHG-UHFFFAOYSA-N	#N/A	#N/A	0.0144925	1
OPRD1	4058	OPRD1	CCOC(=O)C1(CCN(CC1)C)c1ccccc1	TCMSP8016	XADCESSVHJOZHK-UHFFFAOYSA-N	DB00454	approved	0.0420853	1
OPRL1	4253	OPRL1	OC1C=CC2C34C1Oc1c4c(CC2N(CC3)C)ccc1O	UNPD157269	BQJCRHHNABKAKU-UHFFFAOYSA-N	#N/A	#N/A	0.0123481	1
GLA	4366	GLA	CNC(=N)NCCCC(C(=O)O)N	UNPD62268	NTNWOCRCBQPEKQ-UHFFFAOYSA-N	#N/A	#N/A	0.00464649	1
HPGD	4382	HPGD	CNCCc1ccc(c(c1)O)O	UNPD170400	NGKZFDYBISXGGS-UHFFFAOYSA-N	#N/A	#N/A	0.0087642	1
HTR7	4436	HTR7	C1CN=C(N1)Cc1cccc2c1cccc2	UNPD4629	CNIIGCLFLJGOGP-UHFFFAOYSA-N	DB06711	approved	0.0108783	1
TDP1	4728	TDP1	COC1=CC(=O)OC1(O)C(=C)C	UNPD169035	YCOFRPYSZKIPBQ-UHFFFAOYSA-N	#N/A	#N/A	0.00783719	1
CHRM5	4919	CHRM5	OC(c1ccccc1)(C1CCCCC1)CCN1CCCC1	UNPD35570	WYDUSKDSKCASEF-UHFFFAOYSA-N	DB00387	approved	0.0356514	1
PRKACA	4962	PRKACA	OCC1=CC2C3C(C3(C)C)(OC(=O)C)CC(C2(C2C(C1)(O)C(=O)C(=C2)C)O)C	UNPD93998	BOJKFRKNLSCGHY-UHFFFAOYSA-N	#N/A	#N/A	0.0285472	1
FASN	5090	FASN	O=C1OCC(=C1c1ccccc1)c1ccc(cc1)S(=O)(=O)C	UNPD165861	RZJQGNCSTQAWON-UHFFFAOYSA-N	DB00533	investigational; withdrawn	0.00653782	1
GLA	5142	GLA	CSC(=N)N	UNPD180718	SDDKIZNHOCEXTF-UHFFFAOYSA-N	#N/A	#N/A	0.0045714	1
CHRM5	5184	CHRM5	OCC(c1ccccc1)C(=O)OC1CC2N(C(C1)C1C2O1)C	UNPD135203	STECJAGHUSJQJN-UHFFFAOYSA-N	#N/A	#N/A	0.0355081	1
PPARG	5281	PPARG	CCCCCCCCCCCCCCCCCC(=O)O	UNPD154975	QIQXTHQIDYTFRH-UHFFFAOYSA-N	DB03193	experimental	0.0441074	1
MAPT	5649	MAPT	CC1OC(=O)C(NC(=O)C(OC(=O)C(NC(=O)C(C)OC(=O)C(NC(=O)C(OC(=O)C(NC(=O)C(OC(=O)C(NC(=O)C(OC(=O)C(NC1=O)C(C)C)C(C)C)C(C)C)C)C(C)C)C(C)C)C(C)C)C(C)C)C(C)C)C(C)C	UNPD19791	FCFNRCROJUBPLU-UHFFFAOYSA-N	#N/A	#N/A	0.00793259	1
UGT1A1	5756	UGT1A1	Oc1ccc2c(c1)CC[C@@H]1[C@@H]2CC[C@]2([C@H]1C[C@H]([C@@H]2O)O)C	ATCMD7368	PROQIPRRNZUXQM-ZXXIGWHRSA-N	DB04573	approved; vet_approved	0.00987773	1
CAMK2B	5771	CAMK2B	CCC(C1NC(=O)C(Cc2ccc(cc2)O)NC(=O)C(N)CSSCC(NC(=O)C(NC(=O)C(NC1=O)CCC(=O)N)CC(=O)N)C(=O)N1CCCC1C(=O)NC(C(=O)NCC(=O)N)CC(C)C)C	UNPD4401	XNOPRXBHLZRZKH-UHFFFAOYSA-N	#N/A	#N/A	0.00366619	1
ALOX15	5781	ALOX15	O=C1NC(=O)C(=O)C(=O)N1	UNPD86235	HIMXGTXNXJYFGB-UHFFFAOYSA-N	#N/A	#N/A	0.0123353	1
POLB	5814	POLB	NC[C@H](c1ccc(c(c1)O)O)O	TCMSP5685	SFLSHLFXELFNJZ-MRVPVSSYSA-N	#N/A	#N/A	0.0151617	1
G6PD	5879	G6PD	O[C@@H]1CC[C@]2([C@H](C1)CC[C@@H]1[C@@H]2CC[C@]2([C@H]1CCC2=O)C)C	ATCMD1167	QGXBDMJGAMFCBF-HLUDHZFRSA-N	#N/A	#N/A	0.031191	1
G6PD	5880	G6PD	O[C@@H]1CC[C@]2([C@@H](C1)CC[C@@H]1[C@@H]2CC[C@]2([C@H]1CCC2=O)C)C	ATCMD9753	QGXBDMJGAMFCBF-BNSUEQOYSA-N	DB02854	experimental	0.0208863	1
SLCO1B1	5978	SLCO1B1	O=CN1c2cc(OC)c(cc2C23C1C(O)(C(=O)OC)C(OC(=O)C)C1(C3N(CC2)CC=C1)CC)C1(CC2CN(CCc3c1[nH]c1c3cccc1)CC(C2)(O)CC)C(=O)OC	HIT092	OGWKCGZFUXNPDA-XQKSVPLYSA-N	DB00541	approved; investigational	0.0279365	1
APEX1	5983	APEX1	CNC(=O)Oc1ccc2c(c1)[C@]1(C)CCN([C@@H]1N2C)C	ATCMD7363	PIJVFDBKTWXHHD-HIFRSBDPSA-N	DB00981	approved	0.00502419	1
HTR2C	6088	HTR2C	CNCCc1c[nH]c2c1cccc2	UNPD2718	NCIKQJBVUNUXLW-UHFFFAOYSA-N	#N/A	#N/A	0.0258592	1
CA12	7921	CA12	CC1CCC(=O)O1	UNPD136870	GAEKPEKOJKCEMS-UHFFFAOYSA-N	#N/A	#N/A	0.063811	1
MCL1	8342	MCL1	O=C1C(=C(Cl)C(=O)c2c1cccc2)Cl	UNPD38390	SVPKNMBRVBMTLB-UHFFFAOYSA-N	#N/A	#N/A	0.0422161	1
TDP1	9153	TDP1	c1ccc2c(c1)c1cc3ccccc3c3c1c2ccc3	UNPD151995	FTOVXSOBNPWTSH-UHFFFAOYSA-N	#N/A	#N/A	0.0127675	1
PSIP1	10187	PSIP1	Oc1cccc2c1c(O)c1c(c2)cccc1O	UNPD25133	YUTJCNNFTOIOGT-UHFFFAOYSA-N	#N/A	#N/A	0.0227262	1
TDP1	10208	TDP1	Cc1cc(O)c2c(c1)C(=O)c1c(C2=O)c(O)ccc1	UNPD84919	LQGUBLBATBMXHT-UHFFFAOYSA-N	#N/A	#N/A	0.00922481	1
CHRNB2	10235	CHRNB2	O=c1cccc2n1C[C@@H]1CNC[C@H]2C1	TCMSP3200	ANJTVLIZGCUXLD-DTWKUNHWSA-N	DB09028	approved; investigational	0.0423189	1
CA1	10393	CA1	OCCc1ccc(cc1)O	UNPD17214	YCCILVSKPBXVIP-UHFFFAOYSA-N	#N/A	#N/A	0.0312848	1
CA12	10953	CA12	O=C1CCCCO1	UNPD64807	OZJPLYNZGCXSJM-UHFFFAOYSA-N	#N/A	#N/A	0.0638199	1
CA7	11349	CA7	O=c1c(O)c(oc2c1cccc2)c1ccccc1	UNPD105361	HVQAJTFOCKOKIN-UHFFFAOYSA-N	#N/A	#N/A	0.0323331	1
PGD	11768	PGD	O=C1c2ccccc2C(=O)c2c1c(O)c(c(c2)O)O	UNPD65697	AHKDJQYHVWSRLT-UHFFFAOYSA-N	#N/A	#N/A	0.0217359	1
PDE5	11790	PDE5	O=c1cc(oc2c1ccc1c2cccc1)c1ccccc1	UNPD180985	VFMMPHCGEFXGIP-UHFFFAOYSA-N	DB07453	experimental	0.0158802	1
DRD4	12441	DRD4	COc1ccc2c(c1O)c1c3OCOc3cc3c1[C@H](C2)N(C)CC3	ATCMD2729	LODGIKWNLDQZBM-LBPRGKRZSA-N	#N/A	#N/A	0.0451435	1
HTR1F	14987	HTR1F	OC[C@H]1CN(C)[C@H]2C(=C1)c1cccc3c1c(C2)c[nH]3	ATCMD13213	BIXJFIJYBLJTMK-MEBBXXQBSA-N	#N/A	#N/A	0.0153705	1
MAPT	16054	MAPT	Oc1ccc2c(c1)cc[nH]2	TCMSP6946	LMIQERWZRIFWNZ-UHFFFAOYSA-N	#N/A	#N/A	0.0109189	1
VDR	16078	VDR	CCCCCc1cc(O)c2c(c1)OC([C@H]1[C@H]2C=C(C)CC1)(C)C	ATCMD20985	CYQFCXCEBYINGO-IAGOWNOFSA-N	DB00470	approved; illicit	0.0234816	1
CA12	20125	CA12	CCCCC(C(=N)O)CC	UNPD41766	GMORVOQOIHISPT-UHFFFAOYSA-N	#N/A	#N/A	0.0477509	1
PTPN6	26257	PTPN6	CCCCCC(=O)C(=O)CCCCC	TCMSP10253	HGPCKXFCLDLIFH-UHFFFAOYSA-N	#N/A	#N/A	0.0277622	1
CA1	31404	CA1	Cc1cc(c(c(c1)C(C)(C)C)O)C(C)(C)C	UNPD186724	NLZUEZXRPGMBCV-UHFFFAOYSA-N	#N/A	#N/A	0.0188929	1
DRD1	54456	DRD1	CC1NCCc2c1cc(O)c(c2)O	UNPD118033	IBRKLUSXDYATLG-UHFFFAOYSA-N	#N/A	#N/A	0.0316141	1
CTSV	65036	CTSV	C=CCSS(=O)CC=C	UNPD162835	JDLKFOPOAOFWQN-UHFFFAOYSA-N	#N/A	#N/A	0.0241617	1
DYRK2	68094	DYRK2	O=c1ccc2c(c1)[nH]c1c2cc[nH]c1C	TCMID3731	LBBJNGFCXDOYMQ-UHFFFAOYSA-N	#N/A	#N/A	0.00728	1
DRD4	68186	DRD4	Fc1ccc(cc1)OCCCN1CCC2(CC1)C(=O)NCN2c1ccccc1	TCMID6939	FJUKDAZEABGEIH-UHFFFAOYSA-N	#N/A	#N/A	0.0117438	1
CA7	69894	CA7	COc1cc2oc(=O)ccc2cc1O	UNPD138161	SYTYLPHCLSSCOJ-UHFFFAOYSA-N	#N/A	#N/A	0.0603327	1
OPRL1	72277	OPRL1	Oc1cc2O[C@H](c3cc(O)c(c(c3)O)O)[C@@H](Cc2c(c1)O)O	ATCMD6903	XMOCLSLCDHWDHP-IUODEOHRSA-N	#N/A	#N/A	0.012256	1
TRPV1	72300	TRPV1	C=CCc1ccc(c(c1)c1cc(CC=C)ccc1O)O	UNPD44814	VVOAZFWZEDHOOU-UHFFFAOYSA-N	#N/A	#N/A	0.0150077	1
ADRA2A	72457	ADRA2A	Oc1ccc2c(c1)[nH]cc2C(=O)c1[nH]cc(n1)c1c[nH]c2c1cccc2	UNPD111235	TVPNFKRGOFJQOO-UHFFFAOYSA-N	#N/A	#N/A	0.0175459	1
OPRL1	73160	OPRL1	Oc1cc2O[C@@H](c3ccc(c(c3)O)O)[C@@H](Cc2c(c1)O)O	ATCMD3301	PFTAWBLQPZVEMU-HIFRSBDPSA-N	#N/A	#N/A	0.0122547	1
AKR1B1	73659	AKR1B1	O[C@@H]1C[C@@]2(C)[C@H](C([C@H]1O)(C)C)CC[C@@]1([C@@H]2CC=C2[C@@]1(C)CC[C@@]1([C@H]2CC(C)(C)CC1)C(=O)O)C	ATCMD6045	MDZKJHQSJHYOHJ-LLICELPBSA-N	#N/A	#N/A	0.0266707	1
SI	92381	SI	OC[C@H]1N(C)C[C@@H]([C@H]([C@@H]1O)O)O	TCMID1571	AAKDPDFZMNYDLR-XZBKPIIZSA-N	#N/A	#N/A	0.0389874	1
TDP2	96932	TDP2	COc1ccc(cc1OC)C(=O)c1nccc2c1cc(OC)c(c2)OC	UNPD122040	QJTBIAMBPGGIGI-UHFFFAOYSA-N	#N/A	#N/A	0.0277823	1
XIAP	100659	XIAP	CCCCCCCCCCCCCC1=C(O)C(=O)C=C(C1=O)O	UNPD4853	AMKNOBHCKRZHIO-UHFFFAOYSA-N	#N/A	#N/A	0.0111724	1
CHRNA3	101616	CHRNA3	O[C@H](c1ccccc1)C[C@@H]1CCC[C@@H](N1C)CC(=O)c1ccccc1	TCMID1601	MXYUKLILVYORSK-HBMCJLEFSA-N	DB05137	investigational	0.0383609	1
CA1	118534	CA1	OC(=O)Cc1ccc(c(c1)Cl)O	UNPD90007	IYTUKSIOQKTZEG-UHFFFAOYSA-N	#N/A	#N/A	0.0312632	1
RELA	120879	RELA	COC(=O)C1CC23C(C41Nc1c(C54C3N(CC5)CC=C2)cccc1)C	UNPD120550	JSLDLCGKZDUQSH-UHFFFAOYSA-N	#N/A	#N/A	0.00986082	1
CTSL	122724	CTSL	O=C1C=C2C(=CC=C3[C@@]2(C)CC[C@@]2([C@]3(C)CC[C@@]3([C@H]2C[C@@](C)(CC3)C(=O)O)C)C)C(=C1O)C	ATCMD3360	KQJSQWZMSAGSHN-JJWQIEBTSA-N	#N/A	#N/A	0.0115772	1
RELA	136420	RELA	COc1ccc(cc1)c1coc2c(c1=O)c(OC)cc(c2)OC	UNPD119450	PVVORTURQPBPEQ-UHFFFAOYSA-N	#N/A	#N/A	0.0100011	1
PTPN6	138508	PTPN6	CCCC(=O)C(=O)CCC	UNPD98610	XYZAPOXYXNIBEU-UHFFFAOYSA-N	#N/A	#N/A	0.0277942	1
CHRM5	154059	CHRM5	O=C(N1CCc2c([C@@H]1c1ccccc1)cccc2)O[C@H]1CN2CCC1CC2	TCMID6909	FBOUYBDGKBSUES-VXKWHMMOSA-N	DB01591	approved	0.0354664	1
CTSB	161091	CTSB	Oc1cc(nc2c1cccc2)c1ccccc1	UNPD85764	JGABMVVOXLQCKZ-UHFFFAOYSA-N	#N/A	#N/A	0.0213977	1
CELA1	168928	CELA1	C[C@@H]1CC[C@]2([C@@H]([C@H]1C)C1=CC[C@H]3[C@@]([C@@]1(CC2)C)(C)CC[C@@H]1[C@]3(C)CC[C@H]([C@]1(C)C(=O)O)O)C	ATCMD2563	NBGQZFQREPIKMG-PONOSELZSA-N	#N/A	#N/A	0.087045	1
ADRA2A	179268	ADRA2A	Brc1ccc2c(c1)[nH]cc2c1[nH]cc(n1)c1c[nH]c2c1ccc(c2)Br	UNPD110230	BIGUXWQKCPFOAH-UHFFFAOYSA-N	#N/A	#N/A	0.0175215	1
OPRL1	182232	OPRL1	Oc1cc2O[C@@H](c3ccc(c(c3)O)O)[C@H](Cc2c(c1)O)O	TCMSP72	PFTAWBLQPZVEMU-ZFWWWQNUSA-N	#N/A	#N/A	0.0122547	1
ALOX15	189985	ALOX15	C=CC(C1=CC(=O)C(=C(C1=O)OC)OC)c1ccccc1	UNPD38117	LJEJBLOFFDLRIH-UHFFFAOYSA-N	#N/A	#N/A	0.0184565	1
PGD	196978	PGD	Oc1cc(O)c2c(c1)C(=O)c1c(C2=O)cccc1	UNPD141210	WPWWKBNOXTZDQJ-UHFFFAOYSA-N	#N/A	#N/A	0.0217257	1
RAB9A	216328	RAB9A	COc1cc(O)cc2c1c(O)c1c(c2)OC(CC1=O)(C)O	UNPD110755	FKCYENFBFZUSDP-UHFFFAOYSA-N	#N/A	#N/A	0.0319129	1
POLB	222515	POLB	Oc1ccc2c(c1)OCC1(C2c2cc(O)c(cc2C1)O)O	UNPD49142	UWHUTZOCTZJUKC-UHFFFAOYSA-N	#N/A	#N/A	0.0145889	1
G6PD	222528	G6PD	OC1CCC2(C(C1)CCC1C2CC(O)C2(C1CCC2C(CCC(=O)O)C)C)C	HIT056	KXGVEGMKQFWNSR-LLQZFEROSA-N	DB07690	experimental	0.0231025	1
RELA	259631	RELA	O=C(c1ccccc1)CNC(=O)c1ccccc1	UNPD45361	MIJZKZQWQXKSPA-UHFFFAOYSA-N	#N/A	#N/A	0.00982704	1
RELA	259776	RELA	O[C@H]1CC[C@]2([C@](C1)(O)CC[C@@H]1[C@@H]2CC[C@]2([C@]31O[C@@H]3[C@@H]([C@@H]2c1ccc(=O)oc1)OC(=O)C)C)C	ATCMD3724	KBKUJJFDSHBPPA-ZNCGZLKOSA-N	#N/A	#N/A	0.00989771	1
HSD17B10	364106	HSD17B10	COc1ccc(cc1)C(C1=CC(=O)C(=CC1=O)OC)C=C	UNPD135202	FSNITHOUQGJHTR-UHFFFAOYSA-N	#N/A	#N/A	0.0121646	1
CDK5	400433	CDK5	Nc1nccc(n1)c1c[nH]c2c1cccc2	UNPD13513	QNMZWFNNJMGJPU-UHFFFAOYSA-N	#N/A	#N/A	0.0598726	1
APEX1	439533	APEX1	Oc1cc2O[C@H](c3ccc(c(c3)O)O)[C@H](C(=O)c2c(c1)O)O	ATCMD5687	CXQWRCVTCMQVQX-LSDHHAIUSA-N	DB02224	experimental	0.0175456	1
MBD2	439654	MBD2	COc1cc2CCN3[C@H](c2cc1O)Cc1c(C3)c(O)c(cc1)OC	ATCMD19500	KNWVMRVOBAFFMH-HNNXBMFYSA-N	#N/A	#N/A	0.0411621	1
DRD1	440988	DRD1	Oc1ccc(cc1)C[C@H]1NCCc2c1cc(O)c(c2)O	ATCMD5056	WZRCQWQRFZITDX-CQSZACIVSA-N	#N/A	#N/A	0.0316557	1
SHBG	441302	SHBG	O[C@H]1CC[C@]2([C@H](C1)CC[C@@H]1[C@@H]2CC[C@]2([C@H]1CCC2=O)C)C	ATCMD9754	QGXBDMJGAMFCBF-LUJOEAJASA-N	#N/A	#N/A	0.0370801	1
SLC6A2	442108	SLC6A2	CCC1C[C@@H]2CN3[C@@H]1[C@@H](C2)c1[nH]c2c(c1CC3)cc(cc2)OC	TCMID11095	HSIBGVUMFOSJPD-NXWOVTFFSA-N	#N/A	#N/A	0.0303054	1
ADRA2A	456386	ADRA2A	Brc1ccc2c(c1)[nH]cc2c1c[nH]c(n1)c1c[nH]c2c1cccc2	UNPD8808	OWBTWZBJRVBXIC-UHFFFAOYSA-N	#N/A	#N/A	0.0175718	1
ADRA2A	456387	ADRA2A	Brc1ccc2c(c1)[nH]cc2c1[nH]cc(n1)c1c[nH]c2c1cccc2	UNPD161741	XSZLSJCZRNPIOM-UHFFFAOYSA-N	#N/A	#N/A	0.0175718	1
ANPEP	457901	ANPEP	CC(=O)OCC1(C)CCCC23C1C(O)C(O)(OC2)C12C3CCC(C2O)C(=C)C1=O	UNPD177138	JMCGQPHJXFUMBU-UHFFFAOYSA-N	#N/A	#N/A	0.0149884	1
RELA	458553	RELA	OC(c1ccccc1)CNC(=O)c1ccccc1	UNPD37552	JZUOCQXDQFRPAF-UHFFFAOYSA-N	#N/A	#N/A	0.00982615	1
ADORA2B	619024	ADORA2B	Nc1nc(cc(n1)c1ccccc1)c1ccccc1	UNPD114678	KZUCBEYDRUCBCS-UHFFFAOYSA-N	#N/A	#N/A	0.0899923	1
MAPT	628528	MAPT	COc1ccc2c(c1)occ(c2=O)c1ccc(c(c1)OC)OC	UNPD170579	UKWLNMIPRJLYGH-UHFFFAOYSA-N	#N/A	#N/A	0.0100395	1
GSTA1	637760	GSTA1	O=C(c1ccccc1)/C=C/c1ccccc1	UNPD137462	DQFBYFPFKXHELB-VAWYXSNFSA-N	#N/A	#N/A	0.0120409	1
CNR1	638024	CNR1	O=C(N1CCCCC1)/C=C/C=C/c1ccc2c(c1)OCO2	UNPD107247	MXXWOMGUGJBKIW-YPCIICBESA-N	#N/A	#N/A	0.00789411	1
RELA	641115	RELA	O=C(N1CCCCC1)/C=C/c1ccc2c(c1)OCO2	UNPD114189	BLPUOQGPBJPXRL-FNORWQNLSA-N	#N/A	#N/A	0.0098299	1
CHRM2	656392	CHRM2	CC[C@H]([C@H](C(=O)OC[C@H]1CCN2[C@H]1CCC2)O)C	TCMID4885	AVBKRVFZNFJQBK-FVCCEPFGSA-N	#N/A	#N/A	0.0453482	1
RELA	669595	RELA	O=C(c1ccc2c(c1)OCO2)NCCc1ccccc1	UNPD96552	KBJGLIJMWJNSKP-UHFFFAOYSA-N	#N/A	#N/A	0.00984119	1
NPC1	676035	NPC1	COc1cc(ccc1O)c1cc(=O)c2c(o1)cccc2	UNPD12318	KTFLFGFPJQSPNR-UHFFFAOYSA-N	#N/A	#N/A	0.0110291	1
RELA	677576	RELA	O=c1ccc2c(o1)cc1c(c2)cc(o1)C(C)C	UNPD166426	KVHBNBMOEQQULB-UHFFFAOYSA-N	#N/A	#N/A	0.00986367	1
RELA	684658	RELA	O=C(c1ccccc1)NCCc1c[nH]c2c1cccc2	UNPD100397	KTEDBFKQSUUOQJ-UHFFFAOYSA-N	#N/A	#N/A	0.00981657	1
ALOX15	688664	ALOX15	COc1c(oc2c(c1=O)ccc(c2)OC)c1ccccc1	UNPD78356	CNDZOPXQZSXGSK-UHFFFAOYSA-N	#N/A	#N/A	0.0107538	1
APEX1	712318	APEX1	Oc1cc2O[C@H](c3ccc(c(c3)O)O)[C@@H](C(=O)c2c(c1)O)O	ATCMD7008	CXQWRCVTCMQVQX-HUUCEWRRSA-N	#N/A	#N/A	0.0175456	1
MAPT	736715	MAPT	OC(=O)/C=C/c1cnc[nH]1	UNPD160594	LOIYMIARKYCTBW-OWOJBTEDSA-N	DB01971	experimental	0.0100179	1
GPBAR1	1794427	GPBAR1	O=C(O[C@@H]1C[C@@](O)(C[C@H]([C@H]1O)O)C(=O)O)/C=C/c1ccc(c(c1)O)O	UNPD224611	CWVRJTMFETXNAD-JUHZACGLSA-N	#N/A	#N/A	0.00812726	1
XIAP	4187769	XIAP	CCCCCCCCCCCCCCCC1=C(O)C(=O)C=C(C1=O)O	UNPD38804	GXDURRGUXLDZKN-UHFFFAOYSA-N	#N/A	#N/A	0.0111724	1
MAPT	4217712	MAPT	COc1c(OC)ccc2c1C(=O)c1ccccc1C2=O	UNPD19611	AMKRBKSZCGCEJK-UHFFFAOYSA-N	#N/A	#N/A	0.0101352	1
HPGD	5036900	HPGD	Oc1cc(C)c(c(c1)O)c1c(N)cc2c(c1C)nc1c(o2)cc(=O)cc1C	UNPD41969	NNZHGEUZKBYASA-UHFFFAOYSA-N	#N/A	#N/A	0.010276	1
CA7	5133468	CA7	C=CCOc1cc(=O)oc2c1cccc2	UNPD11260	LWRKLYVFSHDLMU-UHFFFAOYSA-N	#N/A	#N/A	0.0559334	1
PRKCB	5273566	PRKCB	OC[C@H]1O[C@@H](OCCc2ccc(c(c2)O)O)[C@@H]([C@H]([C@@H]1OC(=O)/C=C/c1ccc(c(c1)O)O)O)O	UNPD226334	UHIGZYLCYRQESL-VJWFJHQPSA-N	#N/A	#N/A	0.0213863	1
PRKCB	5273567	PRKCB	O=C(OC[C@H]1O[C@@H](OCCc2ccc(c(c2)O)O)[C@@H]([C@H]([C@@H]1O)O)O)/C=C/c1ccc(c(c1)O)O	UNPD213734	LFKQVVDFNHDYNK-FOXCETOMSA-N	#N/A	#N/A	0.021385	1
MAPT	5280448	MAPT	COc1ccc(cc1O)c1coc2c(c1=O)ccc(c2)O	UNPD22168	ZZAJQOPSWWVMBI-UHFFFAOYSA-N	#N/A	#N/A	0.0100058	1
CA7	5281426	CA7	Oc1ccc2c(c1)oc(=O)cc2	UNPD16064	ORHBXUUXSCNDEV-UHFFFAOYSA-N	#N/A	#N/A	0.0559862	1
CDK1	5281623	CDK1	COc1cc(O)c2c(c1)oc1c(c2=O)c(O)ccc1O	UNPD106618	JDIORNFCMMYMLF-UHFFFAOYSA-N	#N/A	#N/A	0.0314928	1
CLK1	5281626	CLK1	Oc1cc(O)c2c(c1)oc1c(c2=O)c(O)ccc1O	UNPD48443	MPXAWSABMVLIBU-UHFFFAOYSA-N	#N/A	#N/A	0.0539502	1
MAPT	5281628	MAPT	COc1c(O)cc2c(c1O)c(=O)cc(o2)c1ccc(cc1)O	UNPD27109	IHFBPDAQLQOCBX-UHFFFAOYSA-N	#N/A	#N/A	0.00998008	1
AXL	5281657	AXL	Oc1cc(C)c2c(c1)oc1c(c2=O)c(O)cc(c1)O	UNPD179320	AQZHBCDRWFMXIN-UHFFFAOYSA-N	#N/A	#N/A	0.0175397	1
AKR1B10	5281691	AKR1B10	COc1cc(O)c2c(c1)oc(c(c2=O)O)c1ccc(c(c1)O)O	UNPD72184	JGUZGNYPMHHYRK-UHFFFAOYSA-N	#N/A	#N/A	0.0122714	1
NPC1	5281704	NPC1	COc1ccc(cc1)c1coc2c(c1=O)cc(c(c2)O)OC	UNPD76847	KJGPBYUQZLUKLL-UHFFFAOYSA-N	#N/A	#N/A	0.0280868	1
PTGS2	5281717	PTGS2	Oc1ccc(c(c1)O)/C=C/c1cc(O)cc(c1)O	UNPD33660	PDHAOJSHSJQANO-OWOJBTEDSA-N	#N/A	#N/A	0.0223713	1
PRKCB	5281773	PRKCB	O=C(O[C@@H]1[C@@H](CO[C@@H]2O[C@@H](C)[C@@H]([C@H]([C@H]2O)O)O)O[C@H]([C@@H]([C@H]1O)O)OCCc1ccc(c(c1)O)O)/C=C/c1ccc(c(c1)O)O	TCMTW21565	DTOUWTJYUCZJQD-UJERWXFOSA-N	#N/A	#N/A	0.0213857	1
GPBAR1	5281780	GPBAR1	O=C(O[C@@H]1[C@H](O)C[C@@](C[C@H]1OC(=O)/C=C/c1ccc(c(c1)O)O)(O)C(=O)O)/C=C/c1ccc(c(c1)O)O	UNPD213937	UFCLZKMFXSILNL-PSEXTPKNSA-N	#N/A	#N/A	0.00812726	1
UBE2I	5281858	UBE2I	CCCCCC/C=C\CCCCCCCc1cccc(c1C(=O)O)O	UNPD116089	YXHVCZZLWZYHSA-FPLPWBNLSA-N	#N/A	#N/A	0.0550015	1
TRPV1	5282280	TRPV1	CCCCC/C=C\C/C=C\C/C=C\C/C=C\CCCC(=O)OC(CO)CO	UNPD191617	RCRCTBLIHCHWDZ-DOFZRALJSA-N	#N/A	#N/A	0.0173174	1
RELA	5284639	RELA	OCC1OC(Oc2cc(O)c3c(c2)occ(c3=O)c2ccc(cc2)O)C(C(C1O)O)O	UNPD135726	ZCOLJUOHXJRHDI-UHFFFAOYSA-N	#N/A	#N/A	0.00986871	1
CHRNB1	5310967	CHRNB1	CNCC/C=C/c1cccnc1	UNPD25666	JUOSGGQXEBBCJB-GORDUTHDSA-N	DB05855	investigational	0.0443482	1
RELA	5316733	RELA	COc1c(O)cc2c(c1O)C(=O)CC(O2)c1ccccc1	UNPD125932	QUAPPCXFYKSDSV-UHFFFAOYSA-N	#N/A	#N/A	0.00989356	1
CES2	5316743	CES2	CC1COC2=C1C(=O)C(=O)c1c2ccc2c1cccc2C	UNPD87772	HARGZZNYNSYSGJ-UHFFFAOYSA-N	#N/A	#N/A	0.0408245	1
KDM4E	5317419	KDM4E	O=Cc1c(O)cc(c2c1Oc1c(OC2=O)c(COC(=O)/C=C/C(=O)O)c(c(c1C)C(=O)O)O)C	UNPD107958	VEGGRTFDFMUBPD-ONEGZZNKSA-N	#N/A	#N/A	0.0105406	1
TUBB2B	5318432	TUBB2B	O=C1c2ccccc2N/C/1=C\1/Nc2c(C1=O)cccc2	UNPD41221	COHYTHOBJLSHDF-BUHFOSPRSA-N	#N/A	#N/A	0.0160409	1
CDK1	5318433	CDK1	O=C1/C(=C\2/C(=O)Nc3c2cccc3)/Nc2c1cccc2	UNPD149681	CRDNMYFJWFXOCH-YPKPFQOOSA-N	#N/A	#N/A	0.0540369	1
MAPT	5320438	MAPT	COc1ccc(cc1)c1cc(=O)c2c(o1)cc(c(c2O)OC)O	UNPD119239	GPQLHGCIAUEJQK-UHFFFAOYSA-N	#N/A	#N/A	0.00808542	1
POLB	5352000	POLB	Oc1cc(O)c2c(c1)oc(c(c2=O)OC1OC(C)C(C(C1O)O)O)c1cc(O)c(c(c1)O)O	UNPD105569	DCYOADKBABEMIQ-UHFFFAOYSA-N	#N/A	#N/A	0.0194667	1
RELA	5358913	RELA	OCC1OC(Oc2cc(O)c3c(c2)occ(c3=O)c2ccc(cc2)OC)C(C(C1O)O)O	UNPD117985	LFEUICHQZGNOHD-UHFFFAOYSA-N	#N/A	#N/A	0.00990367	1
CA2	5369209	CA2	COC(=O)/C=C/C(=O)O	UNPD10781	NKHAVTQWNUWKEO-NSCUHMNNSA-N	#N/A	#N/A	0.0247296	1
MAPT	5376891	MAPT	Oc1ccc2c(c1)occ(c2=O)c1ccccc1	UNPD188978	WMKOZARWBMFKAS-UHFFFAOYSA-N	#N/A	#N/A	0.00997593	1
MAPT	5386259	MAPT	COc1ccc(cc1)c1coc2c(c1=O)c(O)cc(c2)OC	UNPD36822	DQNLRFRBAWCJHQ-UHFFFAOYSA-N	#N/A	#N/A	0.00806405	1
THPO	5420804	THPO	CC1=CCC[C@@]2(C)O[C@@H]2[C@@H]2[C@@H](CC1)C(=C)C(=O)O2	ATCMD16619	KTEXNACQROZXEV-ZRPLFPEYSA-N	#N/A	#N/A	0.00937443	1
POLB	5538801	POLB	O=C1NC(=O)/C(=C/c2c[nH]c3c2cccc3)/N1	UNPD150968	WJZHVBZSCOLDKV-YHYXMXQVSA-N	#N/A	#N/A	0.0140738	1
GPBAR1	5919576	GPBAR1	O=C(OCc1ccccc1)/C=C/c1ccc(c(c1)O)O	UNPD190090	WWVKQTNONPWVEL-VQHVLOKHSA-N	#N/A	#N/A	0.00799553	1
PPARD	6440462	PPARD	C/C(=C\Cc1c(O)cc(cc1O)/C=C/c1ccccc1)/CCC=C(C)C	UNPD68246	YPGQBVBJFQCVKA-ORSZPIRQSA-N	#N/A	#N/A	0.0505541	1
HSD11B2	6474893	HSD11B2	COc1cc(/C=C/C(=O)/C=C/c2ccc(c(c2)OC)O)ccc1O	UNPD167928	ISIMGBQRFXXNON-FCXRPNKRSA-N	#N/A	#N/A	0.00967425	1
MMP9	6476333	MMP9	O=C(OC[C@H]1O[C@@H](OCCc2ccc(c(c2)O)O)[C@@H]([C@H]([C@@H]1O)O[C@@H]1O[C@@H](C)[C@@H]([C@H]([C@H]1O)O)O)O)/C=C/c1ccc(c(c1)O)O	UNPD217976	FNMHEHXNBNCPCI-QEOJJFGVSA-N	#N/A	#N/A	0.0562087	1
ALDH1A1	6603962	ALDH1A1	Oc1cc(/C=C\c2ccc(c(c2)O)O)cc(c1)O	TCMSP3918	CDRPUGZCRXZLFL-UPHRSURJSA-N	#N/A	#N/A	0.00940792	1
ALOX15	6604740	ALOX15	O=C(O[C@H](C(=O)O)Cc1ccc(c(c1)O)O)/C=C\c1ccc(c(c1)O)O	TCMTW53223	DOUMFZQKYFQNTF-UYZDIKGJSA-N	#N/A	#N/A	0.0120549	1
PDE5	6852214	PDE5	COc1ccc(cc1)c1oc2c(CCC(C)C)c(O)cc(c2c(=O)c1O[C@@H]1O[C@@H](C)[C@@H]([C@H]([C@H]1O)O)O)O	TCMTW19175	PFVZUXQCELCLBL-LVKFHIPRSA-N	#N/A	#N/A	0.0836818	1
GABRA1	7059534	GABRA1	OC(=O)C1=CCNCC1	TCMSP4998	KRVDMABBKYMBHG-UHFFFAOYSA-N	#N/A	#N/A	0.061172	1
CDK5R1	9995236	CDK5R1	Nc1nccc(n1)c1c[nH]c2c1c(O)ccc2Br	UNPD16265	USBKPWRTJAXTBS-UHFFFAOYSA-N	#N/A	#N/A	0.0405218	1
DRD3	10034684	DRD3	Oc1ccc2c(c1)CCN2	UNPD159695	MPCXQPXCYDDJSR-UHFFFAOYSA-N	#N/A	#N/A	0.0312116	1
CTSB	10063343	CTSB	CCCCCCCCCCCc1cc(=O)c2c([nH]1)cccc2	UNPD117447	KKSIGOUTTVXAKQ-UHFFFAOYSA-N	#N/A	#N/A	0.0320178	1
CA7	10076040	CA7	COc1cc(ccc1O)c1c2c3cc(OC)c(cc3oc(=O)c2n2c1c1cc(OC)c(c(c1cc2)OC)OC)O	UNPD90322	PWRVNSDJDNLXEO-UHFFFAOYSA-N	#N/A	#N/A	0.0603959	1
GPBAR1	10083644	GPBAR1	O=C(OCc1ccccc1)/C=C/c1ccc(cc1)O	UNPD51643	RGZZCZQQPNJCPO-DHZHZOJOSA-N	#N/A	#N/A	0.00799902	1
MIF	10084135	MIF	C/C=C/C=C/C=C\CC/C=C/C(=O)NCC(O)(C)C	UNPD93675	LHFKHAVGGJJQFF-UEOYEZOQSA-N	#N/A	#N/A	0.0137262	1
FGFR3	10243546	FGFR3	c1ccc2c(c1)cc(cn2)c1c[nH]c2c1cccc2	UNPD105370	BJQHKICYZOBROI-UHFFFAOYSA-N	#N/A	#N/A	0.0632926	1
TNF	10298511	TNF	CC(=CCc1c(O)c(O)c(c2c1c(=O)c1c(o2)cc(c(c1O)CC=C(C)C)O)CC=C(C)C)C	UNPD188465	WVJYEKGQSBGNRP-UHFFFAOYSA-N	#N/A	#N/A	0.0306195	1
CDK5R1	10380356	CDK5R1	Brc1cc(O)c2c(c1)[nH]cc2c1ccnc(n1)N	UNPD91231	PYQFQGXOARMGAQ-UHFFFAOYSA-N	#N/A	#N/A	0.040618	1
ESR2	10812923	ESR2	COc1cc(O)c(c2c1C(=O)C[C@H](O2)c1ccc(cc1O)O)CC(C(=C)C)CC=C(C)C	ATCMD12303	LTTQKYMNTNISSZ-KESSSICBSA-N	#N/A	#N/A	0.0292067	1
PGD	11031986	PGD	O=C1c2cc(O)c(cc2C(=O)c2c1cccc2)O	UNPD186803	KQSBZNJFKWOQQK-UHFFFAOYSA-N	#N/A	#N/A	0.0217254	1
CA1	11278507	CA1	COc1cc(CO)cc2c1c(=O)c1c(o2)ccc(c1C(=O)O)O	UNPD156195	WKVDGQDBUCFWBJ-UHFFFAOYSA-N	#N/A	#N/A	0.0314392	1
CA1	11379284	CA1	COc1cc(ccc1O)/C=C/1\N=C(NC1=O)N	UNPD175243	CWWKTGHWIFDKSB-DAXSKMNVSA-N	#N/A	#N/A	0.0312329	1
CA1	11438030	CA1	COc1cc(C)cc2c1c(=O)c1c(o2)ccc(c1C(=O)O)O	UNPD68330	BQOVQGSBHRLTFG-UHFFFAOYSA-N	#N/A	#N/A	0.0314237	1
HTR2C	11536299	HTR2C	Oc1cccc2c1c(=O)cc(o2)CCc1ccccc1	UNPD95011	OLLHYYCQHNBTQC-UHFFFAOYSA-N	#N/A	#N/A	0.0320198	1
MPEG1	11808877	MPEG1	C/C(=C\Cc1c(O)cc(c(c1O)C(=O)C)O)/CCC=C(C)C	UNPD203899	RCOXTTLIGHDQHU-XYOKQWHBSA-N	#N/A	#N/A	0.0128556	1
PTPRC	11869658	PTPRC	O[C@@H]1CC[C@]2([C@H](C1(C)C)CC[C@@]1([C@@H]2CC=C2[C@@]1(C)CC[C@@]1([C@H]2CC(C)(C)CC1)C(=O)O)C)C	ATCMD6962	MIJYXULNPSFWEK-KDQGZELNSA-N	#N/A	#N/A	0.0295249	1
NPC1	12004580	NPC1	C=C1[C@@H]2CC[C@@H]3[C@](C1=O)([C@@H]2O)C(O)C[C@H]1[C@@]3(C)[C@@H](O)CCC1(C)C	ATCMD12086	VSDVMWBRICFVRW-BIGDWJEQSA-N	#N/A	#N/A	0.0303595	1
PSIP1	12313332	PSIP1	Oc1ccc(cc1)c1oc2cc(O)cc(c2c(=O)c1OC1OC(COC2OC(C)C(C(C2O)O)O)C(C(C1O)O)O)O	UNPD118696	RTATXGUCZHCSNG-UHFFFAOYSA-N	#N/A	#N/A	0.0217303	1
PSIP1	12414277	PSIP1	OCC(=C)C1Cc2c(O1)ccc(c2)C(=O)C	UNPD100057	JRWKMIYLVXKKAN-UHFFFAOYSA-N	#N/A	#N/A	0.0216503	1
APEX1	14155779	APEX1	CC(=O)CCC1C2C1(C)CC(C(C2O)C(C)C)OC(=O)/C=C/c1ccccc1	UNPD106829	MZRGOEIFXVZAOF-ACCUITESSA-N	#N/A	#N/A	0.0148515	1
PPARD	14163455	PPARD	C/C(=C\Cc1c(O)cc(cc1O)/C=C/c1ccc(cc1)O)/CCC=C(C)C	UNPD46533	BBTTUQSLOSGAHM-OBOBVVSZSA-N	#N/A	#N/A	0.0505452	1
GPBAR1	14389411	GPBAR1	O=C(/C=C/c1ccc(cc1)O)OCCc1ccccc1	UNPD116052	GUMNIDBFNHVRBD-DHZHZOJOSA-N	#N/A	#N/A	0.00799807	1
HTR2A	14446222	HTR2A	N=C1N/C(=C/c2c[nH]c3c2cccc3)/C(=O)N1C	UNPD21983	INBAJENOTNXSTK-IZZDOVSWSA-N	#N/A	#N/A	0.0343672	1
HTR2A	14446225	HTR2A	CNC1=N/C(=C/c2c[nH]c3c2cccc3)/C(=O)N1C	UNPD47715	JYSZFLKTAHSXMS-KPKJPENVSA-N	#N/A	#N/A	0.034354	1
HTR2A	14446227	HTR2A	CNC1=N/C(=C/c2c[nH]c3c2ccc(c3)Br)/C(=O)N1C	UNPD84602	WIJJEZADZQGDSE-LFYBBSHMSA-N	#N/A	#N/A	0.0343094	1
RELA	14585037	RELA	COC1CC(OC2CCC3(C(C2)CCC2C3CCC3(C2(O)CC(C3C2=CC(=O)OC2)OC(=O)C)C)C)OC(C1OC1OC(COC2OC(CO)C(C(C2O)O)O)C(C(C1O)O)O)C	UNPD134370	PKZLCDIEFSFXDK-UHFFFAOYSA-N	#N/A	#N/A	0.00988794	1
RELA	16398538	RELA	OC[C@H]1O[C@@H](Oc2ccc(cc2)c2coc3c(c2=O)c(O)cc(c3)OC)[C@@H]([C@H]([C@@H]1O)O)O	ATCMD17943	OFUWGCQDMVDLIR-RECXWPGBSA-N	#N/A	#N/A	0.00990005	1
PSIP1	16745400	PSIP1	COc1cc(ccc1O)CC1COC(C1COC(=O)C)c1ccc(c(c1)OC)O	UNPD190992	LVYMIYJFCKIBMR-UHFFFAOYSA-N	#N/A	#N/A	0.0216283	1
APEX1	16745515	APEX1	C/C=C(\C(=O)O[C@H]1[C@H](C)[C@H](C)[C@H](OC(=O)C)c2c(c3c1cc1OCOc1c3OC)c(OC)c(c(c2)OC)OC)/C	TCMID10697	YBOYAYYCPCFQMW-MWVKEAAGSA-N	#N/A	#N/A	0.0154445	1
PRKACA	18433653	PRKACA	OCC1=CC2C3C(C3(C)C)(OC(=O)Cc3ccccc3)CC(C2(C2C(C1)(O)C(=O)C(=C2)C)O)C	UNPD149311	JAMGGIDPOXFRAM-UHFFFAOYSA-N	#N/A	#N/A	0.0285466	1
PRKACA	21197160	PRKACA	OCC1OC(C(C(C1O)O)O)n1c2c(O)cccc2c2c1c1[nH]c3c(c1c1c2c(=O)[nH]c1=O)cccc3O	UNPD129051	BSQFHYQBCYIAKE-UHFFFAOYSA-N	#N/A	#N/A	0.0246451	1
CA2	21883788	CA2	OC(=O)/C=C/C(=O)O	UNPD151826	VZCYOOQTPOCHFL-OWOJBTEDSA-N	#N/A	#N/A	0.0252889	1
RELA	24791028	RELA	CCCCCC(=O)N[C@H]([C@H](C(=O)O[C@H]1C[C@@]2(O)[C@@H](OC(=O)c3ccccc3)C3[C@@](C(=O)[C@@H](C(=C1C)C2(C)C)OC(=O)C)(C)[C@@H](O)C[C@@H]1[C@]3(CO1)OC(=O)C)O)c1ccccc1	TCMID2324	BEHTXUBGUDGCNQ-QJUJXNPASA-N	#N/A	#N/A	0.00986951	1
RELA	24791041	RELA	C/C=C(/C(=O)N[C@H]([C@H](C(=O)O[C@H]1C[C@@]2(O)[C@@H](OC(=O)c3ccccc3)C3[C@@]4(CO[C@@H]4C[C@@H]([C@]3(C(=O)[C@@H](C(=C1C)C2(C)C)O)C)O)OC(=O)C)O)c1ccccc1)\C	ATCMD4773	ADDGUHVEJPNWQZ-ZZWDPCBWSA-N	#N/A	#N/A	0.00987459	1
RELA	28125531	RELA	COc1cc(ccc1OC)C[C@@H]1COC(=O)[C@H]1Cc1ccc(c(c1)OC)O	TCMID1078	NQWVSMVXKMHKTF-CVEARBPZSA-N	#N/A	#N/A	0.00991114	1
CNR1	44241601	CNR1	C=CCc1ccc(c(c1)c1ccc(c(c1)/C=C/C)O)O	UNPD211902	MHZPQXNOHIORFI-GQCTYLIASA-N	#N/A	#N/A	0.0597413	1
PDE4D	70690671	PDE4D	O[C@@H]1C[C@H](OC(=O)C)C[C@H]2C[C@@H](O)[C@@H]([C@@](O2)(O)C(O)[C@H](O)[C@H](C)CC/C=C/[C@@H](O)C[C@@H]([C@H](/C=C/C(=O)O[C@@H]([C@@H]([C@H]2[C@H]([C@@H](C[C@H](C1)O)O)O2)C)C([C@H]([C@@H]([C@H]([C@H]([C@H](O[C@H]1CC[C@@H]([C@@H](O1)C)O[C@@H]1CC[C@H]([C@@H](O1)C)OC(=O)[C@@H]([C@H](/C(=C/c1ccc2c(c1)C(=O)C=CC2=O)/C)O)C)C)C)O)C)O)C)C)O)O	UNPD220902	OKYZPPPUAQTHME-QCSWNJHXSA-N	#N/A	#N/A	0.0634818	1
MDM4	72946782	MDM4	CCOC(=O)NCCCC(=O)NCCc1ccccc1	UNPD211098	HTOYBIILVCHURC-UHFFFAOYSA-N	#N/A	#N/A	0.0344893	1
POLB	117629482	POLB	OC(=O)c1cccnc1	UNPD79707	PVNIIMVLHYAWGP-UHFFFAOYSA-N	DB00627	approved; investigational; nutraceutical	0.0128821	1
XIAP	118733905	XIAP	CCCCCCCCCCCCCCC1=C(O)C(=O)C=C(C1=O)O	UNPD104253	QZRBZICRAFMUAQ-UHFFFAOYSA-N	#N/A	#N/A	0.0111724	1
UGT1A1	10133|388708	UGT1A1	OC1CCC2(C(C1)CC(C1C2CCC2(C1CCC2C(CCC(=O)O)C)C)O)C	HIT053|HIT087	RUDATBOHQWOJDD-BSWAIDMHSA-N|RUDATBOHQWOJDD-HEGLNSLBSA-N	DB06777	approved	0.0278863	1
TDP1	235|5785	TDP1	OCC(C1OC(=C(C1=O)O)O)O	HIT095|HIT100	TYQCGQRIZGCHNB-JLAZNSOCSA-N|TYQCGQRIZGCHNB-UHFFFAOYSA-N	#N/A	#N/A	0.00942316	1
CA12	23689407|54675830	CA12	[O-]C(=O)c1ccc(cc1)O	ATCMD19960|UNPD159615	FJKROLUGYXJWQN-UHFFFAOYSA-M|ZLVSYODPTJZFMK-UHFFFAOYSA-M	#N/A	#N/A	0.04805	1
MAPT	253	MAPT	OC(=O)CCCCC1SCC2C1NC(=O)N2	UNPD115628	YBJHBAHKTGYVGT-UHFFFAOYSA-N	#N/A	#N/A	0.00761161	1
CASP1	1072	CASP1	OCC(C(C(Cn1c2cc(C)c(cc2nc2c1nc(=O)nc2O)C)O)O)O	UNPD100727	AUNGANRZJHBGPY-UHFFFAOYSA-N	#N/A	#N/A	0.0131074	1
GRM2	1233	GRM2	OC(=O)C(c1onc(c1)O)N	UNPD56276	IRJCBFDCFXCWGO-UHFFFAOYSA-N	#N/A	#N/A	0.0197858	1
CA9	1491	CA9	Oc1ccc(c(c1)O)C(=O)O	UNPD15524	UIAFKZKHHVMJGS-UHFFFAOYSA-N	DB02839	experimental	0.0406877	1
KDM4E	1868	KDM4E	COc1ccc2c(c1)c1CCNCc1[nH]2	UNPD163670	QYMDEOQLJUUNOF-UHFFFAOYSA-N	#N/A	#N/A	0.00870968	1
HSD17B10	2153	HSD17B10	Cn1c(=O)n(C)c2c(c1=O)nc[nH]2	UNPD35892	ZFXYFBGIUFBOJW-UHFFFAOYSA-N	DB00277	approved	0.0137572	1
CHRNA7	2181	CHRNA7	C1CCC(NC1)c1cccnc1	UNPD180207	MTXSIJUGVMTTMU-UHFFFAOYSA-N	#N/A	#N/A	0.0297997	1
GALR3	2230	GALR3	COC(=O)C1=CCCN(C1)C	UNPD93965	HJJPJSXJAXAIPN-UHFFFAOYSA-N	DB04365	experimental	0.00912472	1
ADORA2B	2519	ADORA2B	Cn1cnc2c1c(=O)n(C)c(=O)n2C	UNPD163159	RYYVLZVUVIJVGH-UHFFFAOYSA-N	DB00201	approved	0.0438595	1
ADORA2A	2719	ADORA2A	CCN(CCCC(Nc1ccnc2c1ccc(c2)Cl)C)CC	UNPD97994	WHTVZRBIWZFKQO-UHFFFAOYSA-N	DB00608	approved; vet_approved	0.0125402	1
SLC6A4	2826	SLC6A4	COC(=O)C1C(CC2N(C1CC2)C)OC(=O)c1ccccc1	UNPD126199	ZPUCINDJVBIVPJ-UHFFFAOYSA-N	#N/A	#N/A	0.0231657	1
POLB	3115	POLB	O=CNc1cn(c(c1)C(=O)Nc1cn(c(c1)C(=O)Nc1cn(c(c1)C(=O)NCCC(=N)N)C)C)C	UNPD104909	UPBAOYRENQEPJO-UHFFFAOYSA-N	#N/A	#N/A	0.0078472	1
HTR6	3251	HTR6	O=C(C1CN(C)C2C(=C1)c1cccc3c1c(C2)c[nH]3)NC1(C)OC2(N(C1=O)C(Cc1ccccc1)C(=O)N1C2CCC1)O	UNPD49561	XCGSFFUVFURLIX-UHFFFAOYSA-N	#N/A	#N/A	0.0173545	1
CHRM5	3661	CHRM5	OCC(c1ccccc1)C(=O)OC1CC2CCC(C1)N2C	UNPD114126	RKUNBYITZUJHSG-UHFFFAOYSA-N	#N/A	#N/A	0.0237802	1
LIMK1	3894	LIMK1	Oc1ccc(c(c1)CN(c1ccc(c(c1)C(=O)O)O)Cc1ccccc1O)O	UNPD142769	ULTTYPMRMMDONC-UHFFFAOYSA-N	#N/A	#N/A	0.0273332	1
HTR6	4076	HTR6	NCCc1cc(OC)c(c(c1)OC)OC	UNPD90601	RHCSKNNOAZULRK-UHFFFAOYSA-N	#N/A	#N/A	0.0173374	1
BLM	4764	BLM	Oc1ccc(cc1)C1(OC(=O)c2c1cccc2)c1ccc(cc1)O	UNPD207581	KJFMBFZCATUALV-UHFFFAOYSA-N	DB04824	withdrawn	0.00593046	1
ESR2	4788	ESR2	Oc1ccc(cc1)CCC(=O)c1c(O)cc(cc1O)O	UNPD117524	VGEREEWJJVICBM-UHFFFAOYSA-N	DB07810	experimental	0.017579	1
MAPT	4871	MAPT	CC(=CCc1c2OC(C)(C)C=Cc2c2c(c1O)c(=O)c(co2)c1ccc(c(c1)O)O)C	UNPD152117	GHCZYXUOYFOXIP-UHFFFAOYSA-N	#N/A	#N/A	0.0100065	1
HTR6	4980	HTR6	CN(CCc1c[nH]c2c1c(O)ccc2)C	UNPD189523	SPCIYGNTAMCTRO-UHFFFAOYSA-N	#N/A	#N/A	0.017552	1
MAPT	5100	MAPT	O=C1C=CC(=C(c2ccc(cc2)O)c2ccc(cc2)O)C=C1	TCMSP5430	FYEHYMARPSSOBO-UHFFFAOYSA-N	#N/A	#N/A	0.0091255	1
ADRB1	5403	ADRB1	OC(c1cc(O)cc(c1)O)CNC(C)(C)C	TCMID5542	XWTYSIMOBUGWOL-UHFFFAOYSA-N	DB00871	approved	0.0307991	1
CHRM4	5572	CHRM4	OC(c1ccccc1)(C1CCCCC1)CCN1CCCCC1	UNPD36169	HWHLPVGTWGOCJO-UHFFFAOYSA-N	DB00376	approved	0.0402257	1
UGT1A9	5819	UGT1A9	OC(=O)[C@H](Cc1cc(I)c(c(c1)I)Oc1cc(I)c(c(c1)I)O)N	TCMID11161	XUIIKFGFIJCVMT-LBPRGKRZSA-N	DB00451	approved	0.0221453	1
ADRA2A	5826	ADRA2A	C[C@@H](Cc1ccccc1)N	TCMSP3849	KWTSXDURSIMDCE-QMMMGPOBSA-N	DB01576	approved; illicit	0.0229053	1
SLC10A2	5881	SLC10A2	O[C@H]1CC[C@]2(C(=CC[C@@H]3[C@@H]2CC[C@]2([C@H]3CCC2=O)C)C1)C	ATCMD9756	FMGSKLZLMKYGDP-USOAJAOKSA-N	DB01708	nutraceutical	0.0100586	1
CA1	6305	CA1	OC(=O)[C@H](Cc1c[nH]c2c1cccc2)N	TCMID7364	QIVBCDIJIAJPQS-VIFPVBQESA-N	DB00150	approved; nutraceutical	0.0237855	1
POLB	7172	POLB	CNCC(c1ccc(cc1)O)O	UNPD100703	YRCWQPVGYLYSOX-UHFFFAOYSA-N	DB09203	experimental	0.00786893	1
KDM4E	7381	KDM4E	Oc1ccc(cc1O)C(C)(C)C	TCMSP6831	XESZUVZBAMCAEJ-UHFFFAOYSA-N	#N/A	#N/A	0.00990913	1
HPRT1	8646	HPRT1	Nc1nc2nn[nH]c2c(=O)[nH]1	UNPD178998	LPXQRXLUHJKZIE-UHFFFAOYSA-N	DB01667	experimental	0.0172944	1
CASP9	10145	CASP9	COc1cc2c(cc1OC)CC1c3c2c(OC)c(OC)cc3CCN1C	UNPD133532	RUZIUYOSRDWYQF-UHFFFAOYSA-N	#N/A	#N/A	0.0268397	1
CHRFAM7A	10154	CHRFAM7A	COc1cc2c(cc1O)C[C@H]1c3c2c(OC)c(O)cc3CCN1C	ATCMD2533	LZJRNLRASBVRRX-ZDUSSCGKSA-N	#N/A	#N/A	0.0161128	1
GABRA6	10237	GABRA6	CN1CCc2c([C@H]1[C@@H]1OC(=O)c3c1ccc1c3OCO1)cc1c(c2)OCO1	ATCMD2345	IYGYMKDQCDOMRE-ZWKOTPCHSA-N	DB11562	experimental	0.0612312	1
HTR2B	10257	HTR2B	CN(CCc1c[nH]c2c1cc(O)cc2)C	UNPD149583	VTTONGPRPXSUTJ-UHFFFAOYSA-N	DB01445	experimental; illicit	0.0300096	1
HSD17B10	10367	HSD17B10	OC(=O)c1cccc(n1)C(=O)O	UNPD166425	WJJMNDUMQPNECX-UHFFFAOYSA-N	DB04267	experimental	0.0104236	1
HTR6	10624	HTR6	CN(CCc1c[nH]c2c1c(ccc2)OP(=O)(O)O)C	UNPD169329	QVDSEJDULKLHCG-UHFFFAOYSA-N	#N/A	#N/A	0.0175348	1
PPARD	11005	PPARD	CCCCCCCCCCCCCC(=O)O	UNPD144583	TUNFSRHWOTWDNC-UHFFFAOYSA-N	DB08231	experimental	0.0319234	1
PYGL	29435	PYGL	OC[C@H]1NC[C@@H]([C@H]([C@@H]1O)O)O	TCMID8079	LXBIFEVIBLOUGU-JGWLITMVSA-N	#N/A	#N/A	0.0147746	1
RORA	47936	RORA	C=C[C@@]1(C)CC(=O)[C@]2([C@@](O1)(C)[C@@H](OC(=O)C)[C@H]([C@@H]1[C@]2(C)[C@@H](O)CCC1(C)C)O)O	ATCMD3905	OHCQJHSOBUTRHG-KGGHGJDLSA-N	DB02587	experimental	0.00976611	1
MT3	70547	MT3	CC(=O)NCCc1c[nH]c2c1cccc2	UNPD133626	NVUGEQAEQJTCIX-UHFFFAOYSA-N	#N/A	#N/A	0.013477	1
TRPV1	72303	TRPV1	C=CCc1ccc(c(c1)c1ccc(c(c1)CC=C)O)O	UNPD78062	FVYXIJYOAGAUQK-UHFFFAOYSA-N	#N/A	#N/A	0.0112091	1
AURKA	73293	AURKA	O=C1c2c3[nH]c4c(c3cc[n+]2c2c1cccc2)cccc4	UNPD52058	WYQIPCUPNMRAKP-UHFFFAOYSA-O	#N/A	#N/A	0.0226481	1
HRAS	73677	HRAS	COc1cc(C)c2c(c1C=O)Oc1c(OC2=O)c(C)c(c2c1C(O)OC2=O)O	UNPD143068	SKCUFZLDTAYNBZ-UHFFFAOYSA-N	#N/A	#N/A	0.0236868	1
PDGFRB	91643	PDGFRB	Oc1ccc2c(c1)c1c(C)c3cnccc3c(c1[nH]2)C	UNPD42980	QZTWUDDGLIDXSE-UHFFFAOYSA-N	#N/A	#N/A	0.0405591	1
GABRA6	96215	GABRA6	OC(=O)Cc1c[nH]cn1	UNPD48228	PRJKNHOMHKJCEJ-UHFFFAOYSA-N	#N/A	#N/A	0.027516	1
WEE1	96943	WEE1	Cc1cc2c(c3c1OC(C)(C)C=C3)[nH]c1c2cccc1	UNPD108499	GAEQWKVGMHUUKO-UHFFFAOYSA-N	#N/A	#N/A	0.0116056	1
TSHR	100492	TSHR	COc1cc2c(c3ccc4c(c3)OCO4)c3C(=O)OCc3c(c2cc1OC)O	UNPD181410	VMEJANRODATDOF-UHFFFAOYSA-N	#N/A	#N/A	0.00556509	1
ALOX15	120369	ALOX15	COC(=O)c1c(CC)ccc2c1cc1C(=O)c3c(O)ccc(c3C(=O)c1c2O)O	UNPD147206	DIAOGWYBBJCPAD-UHFFFAOYSA-N	#N/A	#N/A	0.01101	1
CA1	132037	CA1	Oc1c(Cc2cc(O)c(c(c2Br)Br)O)c(O)c(c(c1Cc1cc(O)c(c(c1Br)Br)O)O)Br	UNPD157018	KNHOTGMNAPTUGT-UHFFFAOYSA-N	#N/A	#N/A	0.0457979	1
TRPV1	155160	TRPV1	C=CCc1ccc(c(c1)c1ccc(c(c1)CC=C)OC)O	UNPD174470	OQFHJKZVOALSPV-UHFFFAOYSA-N	#N/A	#N/A	0.0149097	1
NFE2L2	160254	NFE2L2	C[C@H]1COC2=C1C(=O)C(=O)c1c2ccc2c1CCCC2(C)C	ATCMD4281	GVKKJJOMQCNPGB-JTQLQIEISA-N	#N/A	#N/A	0.0173291	1
MCL1	160876	MCL1	COc1cc2c(cc1OC)CC[n+]1c2cc2ccc3c(c2c1)OCO3	UNPD20207	FPJQGFLUORYYPE-UHFFFAOYSA-N	#N/A	#N/A	0.0208036	1
DRD4	161665	DRD4	COc1cc2c(cc1OC)CCN1[C@H]2Cc2ccc(c(c2C1)OC)O	ATCMD4093	DIHXHTWYVOYYDC-INIZCTEOSA-N	#N/A	#N/A	0.0202569	1
KAT5	167551	KAT5	CCCCCCCCCCCCCCCc1cccc(c1C(=O)O)O	UNPD23121	ADFWQBGTDJIESE-UHFFFAOYSA-N	#N/A	#N/A	0.0627983	1
MCL1	199472	MCL1	Oc1cc(O)c2c(c1)O[C@H]([C@@H](C2)OC(=O)c1cc(O)c(c(c1)O)O)c1cc(O)c(c(c1)O)O	TCMTW17972	WMBWREPUVVBILR-NQIIRXRSSA-N	#N/A	#N/A	0.0263113	1
NPC1	235224	NPC1	CN1CCc2c3C1Cc1ccccc1c3c1c(c2)OCO1	UNPD101073	JCTYWRARKVGOBK-UHFFFAOYSA-N	#N/A	#N/A	0.0186311	1
CA7	247704	CA7	CNC[C@H](c1ccc(c(c1)O)O)O	TCMTW47699	UCTWMZQNUQWSLP-SECBINFHSA-N	#N/A	#N/A	0.0537613	1
CA1	289493	CA1	O=c1ccc2c(o1)cc(cc2)OCCC(C1=CC(=O)C(O1)(C)C)C	UNPD49239	GXTVQAPXQFZGLW-UHFFFAOYSA-N	#N/A	#N/A	0.0564538	1
MAPT	300241	MAPT	COc1cccc2c1oc1ccccc1c2=O	UNPD113535	SYEHHMRXODULBY-UHFFFAOYSA-N	#N/A	#N/A	0.00953	1
LMNA	398788	LMNA	COc1cc2c(cc1OC)cc1c3c2c(OC)c(OC)cc3CCN1C	UNPD139207	RZUHGAKUNBFQJS-UHFFFAOYSA-N	#N/A	#N/A	0.00782371	1
CDK1	401171	CDK1	Brc1ccc2c(c1)[nH]cc2c1ccnc(n1)N	UNPD189619	VBPYLWZBNRFLEM-UHFFFAOYSA-N	#N/A	#N/A	0.0354357	1
ADRA2A	439280	ADRA2A	OC(=O)[C@H](Cc1c[nH]c2c1cc(O)cc2)N	TCMSP2398	LDCYZAJDBXYCGN-VIFPVBQESA-N	DB02959	approved; nutraceutical	0.00895353	1
NFE2L2	441207	NFE2L2	O=C1OCC(=C1)[C@H]1CC[C@]2([C@]1(C)CC[C@H]1[C@H]2CC[C@H]2[C@]1(C)CC[C@@H](C2)O[C@H]1C[C@H](O)[C@@H]([C@H](O1)C)O[C@H]1C[C@H](O)[C@@H]([C@H](O1)C)O[C@H]1C[C@H](O)[C@@H]([C@H](O1)C)O)O	ATCMD5515	WDJUZGPOPHTGOT-XUDUSOBPSA-N	DB01396	approved	0.0144393	1
OXER1	445638	OXER1	CCCCCC/C=C\CCCCCCCC(=O)O	UNPD144994	SECPZKHBENQXJG-FPLPWBNLSA-N	#N/A	#N/A	0.0271856	1
ALDH1A1	446541	ALDH1A1	COc1c(C/C=C(/CCC(=O)O)\C)c(O)c2c(c1C)COC2=O	UNPD133303	HPNSFSBZBAHARI-RUDMXATFSA-N	DB01024	approved	0.00859636	1
HSD17B10	493570	HSD17B10	OC[C@H]([C@H]([C@H](Cn1c2cc(C)c(cc2nc2c1nc(=O)[nH]c2=O)C)O)O)O	TCMSP339	AUNGANRZJHBGPY-SCRDCRAPSA-N	DB00140	approved; nutraceutical; vet_approved	0.0165672	1
HTR6	599482	HTR6	COc1ccc2c(c1)[nH]c1c2CCNC1	UNPD208034	SCIRNASYBOGBOO-UHFFFAOYSA-N	#N/A	#N/A	0.0162218	1
HBB	637858	HBB	COc1cc(/C=C/C(=O)N2CCC=CC2=O)cc(c1OC)OC	UNPD98190	VABYUUZNAVQNPG-BQYQJAHWSA-N	#N/A	#N/A	0.00762502	1
ALDH1A1	638034	ALDH1A1	CC(=O)OC/C=C(/C=C/C=C(/C=C/C1=C(C)CCCC1(C)C)\C)\C	UNPD5210	QGNJRVVDBSJHIZ-QHLGVNSISA-N	#N/A	#N/A	0.00759546	1
GANAB	638278	GANAB	Oc1ccc(cc1)/C=C/C(=O)c1ccc(cc1O)O	UNPD102722	DXDRHHKMWQZJHT-FPYGCLRLSA-N	DB03285	experimental	0.0126521	1
POLB	643007	POLB	C/C(=C\Cc1c(O)ccc(c1O)C(=O)/C=C/c1ccc(cc1)O)/CCC=C(C)C	UNPD8617	LRSMBOSQWGHYCW-MDGZPELGSA-N	#N/A	#N/A	0.00907116	1
TYMS	644019	TYMS	CCCCCc1cc(O)c(c(c1)O)[C@@H]1C=C(C)CC[C@H]1C(=C)C	TCMTW48431	QHMBSVQNZZTUGM-ZWKOTPCHSA-N	#N/A	#N/A	0.0174427	1
PNP	667490	PNP	Sc1ncnc2c1nc[nH]2	UNPD167203	GLVAUDGFNGKCSF-UHFFFAOYSA-N	DB01033	approved	0.0228042	1
MMP12	910211	MMP12	O=C(/C=C/c1ccccc1)NCc1ccccc1	UNPD224128	MPWRITRYGLHZBT-VAWYXSNFSA-N	#N/A	#N/A	0.032031	1
RAB9A	1549120	RAB9A	C/C(=C\c1ccccc1)/C=C/1\SC(=S)N(C1=O)CC(=O)O	UNPD207748	CHNUOJQWGUIOLD-NFZZJPOKSA-N	#N/A	#N/A	0.0131074	1
RELA	4369270	RELA	O[C@H]1CC[C@]2([C@@H](C1)CC[C@@H]1[C@@H]2CC[C@]2([C@]1(O)CC[C@@H]2C1=CC(=O)OC1)C)C	ATCMD5514	XZTUSOXSLKTKJQ-CESUGQOBSA-N	#N/A	#N/A	0.00663398	1
APEX1	4475102	APEX1	OCC1OC(C(C(C1O)O)O)c1c(O)cc2c(c1O)c(=O)cc(o2)c1ccc(cc1)O	UNPD125225	MYXNWGACZJSMBT-UHFFFAOYSA-N	#N/A	#N/A	0.01908	1
RECQL	5280647	RECQL	Oc1cc(ccc1O)c1oc2c(O)c(O)cc(c2c(=O)c1O)O	UNPD130798	YRRAGUMVDQQZIY-UHFFFAOYSA-N	#N/A	#N/A	0.0111304	1
OXER1	5280933	OXER1	CCCCC/C=C\C/C=C\C/C=C\CCCCC(=O)O	UNPD164451	VZCCETWTMQHEPK-QNEBEIHSSA-N	#N/A	#N/A	0.0271664	1
MAPT	5281051	MAPT	Oc1cc(C)c2c3c1C(=O)c1c(O)cc(c4c1c3c1c3c2c(C)cc(c3C(=O)c2c1c4c(O)cc2O)O)O	UNPD73617	BTXNYTINYBABQR-UHFFFAOYSA-N	#N/A	#N/A	0.00904438	1
PTGS1	5281295	PTGS1	Oc1ccc2c(c1)O/C(=C\c1ccc(c(c1)O)O)/C2=O	UNPD156349	RGNXWPVNPFAADO-NSIKDUERSA-N	#N/A	#N/A	0.0215984	1
ESR1	5281576	ESR1	C[C@H]1CCCC(=O)CCC/C=C/c2c(C(=O)O1)c(O)cc(c2)O	ATCMD22887	MBMQEIFVQACCCH-QBODLPLBSA-N	#N/A	#N/A	0.0212182	1
APEX1	5281701	APEX1	Oc1cc(O)c2c(c1)oc(cc2=O)c1cc(O)c(c(c1)O)O	UNPD168469	ARSRJFRKVXALTF-UHFFFAOYSA-N	DB08230	experimental	0.0102803	1
POLB	5281813	POLB	COc1cc(O)c2c(c1)oc(=O)c1c2oc2c1cc(c(c2)O)O	UNPD135351	XQDCKJKKMFWXGB-UHFFFAOYSA-N	#N/A	#N/A	0.00903556	1
ALOX5	5281969	ALOX5	CCCCC/C=C\C/C=C\C/C=C\C/C=C\CCCC(=O)NCCO	UNPD193878	LGEQQWMQCRIYKG-DOFZRALJSA-N	#N/A	#N/A	0.00744478	1
PRKDC	5288032	PRKDC	NC1=NC(=O)/C(=C/2\CCNC(=O)c3c2cc[nH]3)/N1	UNPD136354	JYRJOQGKGMHTOO-VURMDHGXSA-N	#N/A	#N/A	0.0286101	1
MMP12	5288826	MMP12	O[C@H]1C=C[C@@H]2[C@@]34[C@H]1Oc1c4c(C[C@H]2N(CC3)C)ccc1O	ATCMD14935	BQJCRHHNABKAKU-KBQPJGBKSA-N	DB00295	approved; investigational	0.00474275	1
NPC1	5317826	NPC1	O=C1C=CCC(O1)/C=C/c1ccccc1	UNPD121361	RLGHFVLWYYVMQZ-MDZDMXLPSA-N	#N/A	#N/A	0.0140414	1
ALOX15	5318834	ALOX15	COc1ccc(c(c1O)O)c1coc2c(c1=O)ccc(c2)O	UNPD60342	SMOFGXHPWCTYQD-UHFFFAOYSA-N	#N/A	#N/A	0.00982278	1
MMP8	5319161	MMP8	COC(=O)C1(O)CC(OC(=O)/C=C/c2ccc(c(c2)O)O)C(C(C1)OC(=O)/C=C/c1ccc(c(c1)O)O)O	UNPD133193	VEBNYMXKXIIGFX-KBXRYBNXSA-N	#N/A	#N/A	0.0505612	1
CHEK2	5324595	CHEK2	O=c1[nH]c(=O)c2c1c1c3ccccc3[nH]c1c1c2[nH]cn1	UNPD63751	LBTREMHIJGMYQN-UHFFFAOYSA-N	#N/A	#N/A	0.0311774	1
SENP8	5331295	SENP8	COc1ccc(cc1)/C=C/C(=O)c1ccccc1O	UNPD58254	NXBNYUSXDBHELA-DHZHZOJOSA-N	#N/A	#N/A	0.0312818	1
CDK5	5359405	CDK5	O=C1/C(=C/2\C(=O)Nc3c2cccc3)/Nc2c1cccc2	UNPD75518	CRDNMYFJWFXOCH-BUHFOSPRSA-N	#N/A	#N/A	0.0484923	1
MAPT	5380645	MAPT	COc1ccc(c(c1)O)C(=O)/C=C/c1ccccc1	UNPD181589	GUNGQVJAKLIYDG-JXMROGBWSA-N	#N/A	#N/A	0.0109699	1
RBBP9	5388993	RBBP9	O=CN1c2cc(OC)c(cc2[C@]23[C@@H]1[C@@](O)(C(=O)OC)[C@H](OC(=O)C)[C@]1([C@@H]3N(CC2)CC=C1)CC)[C@]1(C[C@H]2CN(CCc3c1[nH]c1c3cccc1)C[C@](C2)(O)CC)C(=O)OC	ATCMD22415	OGWKCGZFUXNPDA-CFWMRBGOSA-N	#N/A	#N/A	0.0540118	1
CLK1	5481591	CLK1	COc1ccc(cc1O)c1c2c3cc(OC)c(cc3oc(=O)c2n2c1c1cc(OC)c(cc1cc2)O)O	UNPD137407	POCZBHBFCIWCCV-UHFFFAOYSA-N	#N/A	#N/A	0.0277289	1
HTR2A	6440681	HTR2A	C/N=C/1\NC(=O)/C(=C\c2c[nH]c3c2cccc3)/N1C	UNPD38078	UVIKYYAHZODERH-KPKJPENVSA-N	#N/A	#N/A	0.0239269	1
MMP1	6479915	MMP1	COC(=O)[C@@H](Cc1ccc(c(c1)O)O)OC(=O)/C=C/c1ccc(c(c1)O)O	ATCMD18862	XHALVRQBZGZHFE-BBOMDTFKSA-N	#N/A	#N/A	0.0563151	1
MAPT	6603986	MAPT	O=C(c1c(O)c(Cc2c(O)c(C)c(c(c2O)C(=O)C)O)c(c2c1OC(C)(C)C=C2)O)/C=C\c1ccccc1	TCMID4265	DEZFNHCVIZBHBI-KHPPLWFESA-N	#N/A	#N/A	0.00910703	1
MAPT	6610290	MAPT	COc1cc(cc(c1OC)OC)[C@H]1[C@H]2C(=O)OCC2[C@H](c2c1cc1OCOc1c2)O	TCMID328	YJGVMLPVUAXIQN-DPUNPDONSA-N	#N/A	#N/A	0.00833517	1
HSD17B10	6610322	HSD17B10	CC[C@@]1(O)C(=O)OCc2c1cc1Cc3c(n1c2=O)cc1c(n3)cccc1	TCMID4902	OSVOWNIXMSYPLB-FQEVSTJZSA-N	#N/A	#N/A	0.00920532	1
CA1	6923517	CA1	OC(=O)[C@@H](Cc1c[nH]c2c1cccc2)N	TCMSP1542	QIVBCDIJIAJPQS-SECBINFHSA-N	#N/A	#N/A	0.0236674	1
MAPT	7048703	MAPT	[O-]C(=O)[C@H](Cc1cc(I)c(c(c1)I)Oc1ccc(c(c1)I)O)[NH3+]	TCMID11707	AUYYCJSJGJYCDS-LBPRGKRZSA-N	DB00279	approved; vet_approved	0.00658472	1
SAE1	9875131	SAE1	C=CC/C=C\C/C=C\CCCCCCCc1cccc(c1C(=O)O)O	UNPD194991	QUVGEKPNSCFQIR-UTOQUPLUSA-N	#N/A	#N/A	0.0288542	1
ESR2	9878556	ESR2	COc1ccc(cc1)/C=C\c1cc(OC)cc(c1)OC	UNPD13704	GDHNBPHYVRHYCC-PLNGDYQASA-N	#N/A	#N/A	0.0385771	1
CLK1	9930243	CLK1	O=C1NCCC(c2c1[nH]c(c2Br)Br)c1cnc([nH]1)N	UNPD17837	MRMGABUTBNWSLA-UHFFFAOYSA-N	#N/A	#N/A	0.0199461	1
F10	10252345	F10	O=C(c1ccc(cc1)OCc1ccc(cc1)COc1ccc(cc1)C(=O)C(=O)O)C(=O)O	TCMTW24772	HNHFGJRWYYEILT-UHFFFAOYSA-N	#N/A	#N/A	0.00875749	1
HTR2A	10336056	HTR2A	Brc1ccc2c(c1)[nH]cc2/C=C\1/NC(=N)N(C1=O)C	UNPD116093	AKOYYWJWILIASW-NYYWCZLTSA-N	#N/A	#N/A	0.0298262	1
HTR2B	11177588	HTR2B	NC(=N)NCCC[C@@H]1NC(=O)/C(=C/c2c[nH]c3c2ccc(c3)Br)/NC1=O	UNPD218051	YYFNNPXWRXQUPR-JVXNRYDGSA-N	#N/A	#N/A	0.0345076	1
MMP12	11391937	MMP12	O=C(/C=C/c1ccc(c(c1)O)O)NCCc1ccccc1	UNPD13351	QOWABIXYAFJMQE-VQHVLOKHSA-N	#N/A	#N/A	0.0320547	1
CA9	11674590	CA9	COc1cc2c(=O)oc3c4c2c(c1OC)oc(=O)c4cc(c3O)OC	UNPD136479	NDXSDWFOYZXARW-UHFFFAOYSA-N	#N/A	#N/A	0.0727683	1
APEX1	12004528	APEX1	Oc1cc(O)c2c(c1)oc(c(c2=O)OC1OC(C(=O)O)C(C(C1O)O)O)c1ccc(c(c1)O)O	UNPD162103	DUBCCGAQYVUYEU-UHFFFAOYSA-N	#N/A	#N/A	0.0134745	1
OXER1	14427412	OXER1	C/C=C\CC/C=C/C=C/C(=O)NCC(C)C	UNPD102845	OCUXKVCDBHKIIP-QYHQRLDKSA-N	#N/A	#N/A	0.0268221	1
ALPPL2	16196974	ALPPL2	CC(=CCc1c(O)ccc2c1OC(CC2=O)c1ccc(c(c1)O)O)C	UNPD142450	ADFZZQAJJGHYDR-UHFFFAOYSA-N	#N/A	#N/A	0.0112168	1
MCL1	16196978	MCL1	COc1cc(OC)c2c(c1O)OC(CC2=O)c1ccccc1	UNPD37049	TVWVHFSJQNXIRZ-UHFFFAOYSA-N	#N/A	#N/A	0.013312	1
ADRA2C	16215415	ADRA2C	CN(CCCOc1ccc(cc1Br)CCNC(=O)c1[nH]cc(c1)Br)C	UNPD112489	MOWCGUQGNSAZSR-UHFFFAOYSA-N	#N/A	#N/A	0.0193584	1
CA7	21582667	CA7	COc1ccc(cc1O)c1c2c3cc(O)c(cc3oc(=O)c2n2c1c1cc(OC)c(cc1CC2)OS(=O)(=O)[O-])OC	UNPD19896	LINBWIBAZJQWQY-UHFFFAOYSA-M	#N/A	#N/A	0.0538334	1
HTR2A	23425234	HTR2A	Brc1ccc2c(c1)[nH]cc2/C=C/1\C(=O)N=C(N1C)N	UNPD169317	DLMWCHNLJCOUQC-NYYWCZLTSA-N	#N/A	#N/A	0.0238938	1
MMP12	23652834	MMP12	O=C(/C=C/c1ccc(cc1)O)NCCc1ccccc1	UNPD113777	GQNHFEIKUYMXAQ-DHZHZOJOSA-N	#N/A	#N/A	0.0320291	1
OXER1	24739090	OXER1	COc1cc(CCc2ccccc2)c(c(c1C/C=C(/CCC=C(C)C)\C)O)C(=O)O	UNPD634	DKNIJLWIVUCTHW-CPNJWEJPSA-N	#N/A	#N/A	0.026805	1
GABRR3	40428137	GABRR3	NC/C=C/C(=O)O	UNPD131665	FMKJUUQOYOHLTF-OWOJBTEDSA-N	#N/A	#N/A	0.078724	1
HTR2A	62707559	HTR2A	N=C1NC(=O)/C(=C\c2c[nH]c3c2ccc(c3)Br)/N1	UNPD111189	ATKUMLMUBZNHEI-XCVCLJGOSA-N	#N/A	#N/A	0.0297741	1
MMP2	70694634	MMP2	CCCCOC(=O)[C@@H]1[C@H](Oc2c1c(/C=C/C(=O)O[C@@H](C(=O)O)Cc1ccc(c(c1)O)O)ccc2O)c1ccc(c(c1)O)O	UNPD218652	QWHMMEKTFNJGTI-GNBMGSNXSA-N	#N/A	#N/A	0.0612021	1
HTR2C	896	HTR2C	COc1ccc2c(c1)c(CCNC(=O)C)c[nH]2	UNPD14348	DRLFMBDRBRZALE-UHFFFAOYSA-N	DB01065	approved; nutraceutical; vet_approved	0.0064289	1
ADORA1	1676	ADORA1	CCCn1c(=O)[nH]c(=O)c2c1nc[nH]2	UNPD140104	SIQPXVQCUCHWDI-UHFFFAOYSA-N	DB00824	approved	0.0276599	1
HRH2	2725	HRH2	CN(CCC(c1ccccn1)c1ccc(cc1)Cl)C	TCMID1620	SOYKEARSMXGVTM-UHFFFAOYSA-N	DB01114	approved	0.0220244	1
BLM	3385	BLM	Fc1c[nH]c(=O)[nH]c1=O	UNPD118398	GHASVSINZRGABV-UHFFFAOYSA-N	DB00544	approved	0.00786346	1
CA7	3469	CA7	Oc1ccc(c(c1)C(=O)O)O	UNPD183555	WXTMDXOMEHJXQO-UHFFFAOYSA-N	#N/A	#N/A	0.0485156	1
PPARD	4829	PPARD	CCc1ccc(nc1)CCOc1ccc(cc1)CC1SC(=O)NC1=O	UNPD95349	HYAFETHFCAUJAY-UHFFFAOYSA-N	DB01132	approved; investigational	0.020222	1
SLC6A4	5032	SLC6A4	CNC(C(c1ccccc1)O)C	UNPD138329	KWGRBVOPPLSCSI-UHFFFAOYSA-N	#N/A	#N/A	0.0274004	1
CA1	5054	CA1	Oc1cccc(c1)O	UNPD96572	GHMLBKRAJCXXBS-UHFFFAOYSA-N	#N/A	#N/A	0.0251586	1
HTR6	6166	HTR6	OCC(=O)[C@H]1CC[C@@H]2[C@]1(C)CC[C@H]1[C@H]2CCC2=CC(=O)CC[C@]12C	ATCMD5152	ZESRJSPZRDMNHY-YFWFAHHUSA-N	#N/A	#N/A	0.0104004	1
PGD	6293	PGD	O=C1c2ccccc2C(=O)c2c1ccc(c2O)O	UNPD66789	RGCKGOZRHPZPFP-UHFFFAOYSA-N	#N/A	#N/A	0.0087361	1
HPGD	6683	HPGD	Oc1c(O)cc(c2c1C(=O)c1ccccc1C2=O)O	UNPD131182	BBNQQADTFFCFGB-UHFFFAOYSA-N	#N/A	#N/A	0.0107972	1
CA1	7043	CA1	COc1ccccc1OC	UNPD190368	ABDKAPXRBAPSQN-UHFFFAOYSA-N	#N/A	#N/A	0.0561403	1
CA12	7365	CA12	O[As](=O)(c1ccccc1)O	UNPD41826	LVKZSFMYNWRPJX-UHFFFAOYSA-N	#N/A	#N/A	0.0377674	1
CA7	7420	CA7	Oc1cccc(c1)C(=O)O	UNPD106396	IJFXRHURBJZNAO-UHFFFAOYSA-N	#N/A	#N/A	0.0453606	1
MAPK1	8530	MAPK1	O=C1C=CC(=O)c2c1cccc2	UNPD176848	FRASJONUBLZVQX-UHFFFAOYSA-N	#N/A	#N/A	0.00589841	1
MCOLN3	9308	MCOLN3	O[C@@H]1C[C@H](O[C@H]1C)C[N+](C)(C)C	ATCMD15078	UQOFGTXDASPNLL-XHNCKOQMSA-N	#N/A	#N/A	0.0223785	1
PTK2B	10168	PTK2B	Oc1cc(cc2c1C(=O)c1c(C2=O)cccc1O)C(=O)O	UNPD11311	FCDLCPWAQCPTKC-UHFFFAOYSA-N	#N/A	#N/A	0.00905518	1
NR0B1	10219	NR0B1	CC[C@H]1CN2CCc3c([C@@H]2C[C@@H]1C[C@H]1NCCc2c1cc(OC)c(c2)OC)cc(c(c3)OC)OC	ATCMD6757	AUVVAXYIELKVAI-CKBKHPSWSA-N	#N/A	#N/A	0.0170242	1
MAPT	13622	MAPT	COc1cccc(c1O)O	UNPD9556	LPYUENQFPVNPHY-UHFFFAOYSA-N	#N/A	#N/A	0.0103737	1
SLC6A3	33741	SLC6A3	COc1cccc(c1)[C@@]1(O)CCCC[C@@H]1CN(C)C	TCMID1626	TVYLLZQTGLZFBW-ZBFHGGJFSA-N	DB00193	approved; investigational	0.0262781	1
CA1	35703	CA1	CCOc1cc2oc(=O)ccc2cc1	UNPD126452	LIFAQMGORKPVDH-UHFFFAOYSA-N	#N/A	#N/A	0.0481699	1
UBE2I	64971	UBE2I	CC(=C)C1CC[C@]2([C@H]1[C@H]1CC[C@H]3[C@@]([C@]1(C)CC2)(C)CC[C@@H]1[C@]3(C)CC[C@@H](C1(C)C)O)C(=O)O	ATCMD2329	QGJZLNKBHJESQX-FZFNOLFKSA-N	#N/A	#N/A	0.0293531	1
GALR3	65238	GALR3	O=C(c1cc(O)c(c(c1)O)O)O[C@@H]1O[C@H](COC(=O)c2cc(O)c(c(c2)O)O)[C@H]([C@@H]([C@H]1OC(=O)c1cc(O)c(c(c1)O)O)OC(=O)c1cc(O)c(c(c1)O)O)OC(=O)c1cc(O)c(c(c1)O)O	TCMTW19108	QJYNZEYHSMRWBK-NIKIMHBISA-N	#N/A	#N/A	0.0180749	1
MAPT	68261	MAPT	O=c1c2ccccc2nc2n1CCC2	UNPD162037	VARHXCYGZKSOOO-UHFFFAOYSA-N	#N/A	#N/A	0.00972748	1
ALK	71398	ALK	C[C@H]([C@@H](Cc1ccc(c(c1)O)O)C)Cc1ccc(c(c1)O)O	TCMSP7315	HCZKYJDFEPMADG-TXEJJXNPSA-N	DB00179	approved	0.0111245	1
NR1H3	72276	NR1H3	Oc1cc2O[C@H](c3ccc(c(c3)O)O)[C@@H](Cc2c(c1)O)O	ATCMD6836	PFTAWBLQPZVEMU-UKRRQHHQSA-N	#N/A	#N/A	0.0265378	1
SCN5A	91536	SCN5A	O[C@H](COc1cccc2c1cccc2)CNC(C)C	TCMTW19787	AQHHHDLHHXJYJD-AWEZNQCLSA-N	#N/A	#N/A	0.020195	1
IDE	97662	IDE	COc1cc2c(cc1OC)C(=O)c1c3c2c(OC)c(OC)cc3ccn1	UNPD132362	ZYKCETVKVRJFGD-UHFFFAOYSA-N	#N/A	#N/A	0.0121959	1
PTGS1	107985	PTGS1	O=C1OCC2=C1CCC1(C2CC2C3(C41OC4C1OC1(C3O)C(C)C)O2)C	HIT070	DFBIRQPKNDILPW-CIVMWXNOSA-N	#N/A	#N/A	0.0105139	1
CES1	114917	CES1	Cc1coc2c1C(=O)C(=O)c1c2ccc2c1cccc2C	UNPD54194	AIGAZQPHXLWMOJ-UHFFFAOYSA-N	#N/A	#N/A	0.0442332	1
HPGD	145826	HPGD	Oc1ccc(cc1O)c1oc2ccccc2c(=O)c1O	UNPD99561	KPGMHZQXQVDYNT-UHFFFAOYSA-N	#N/A	#N/A	0.0100249	1
CA2	155148	CA2	COc1c2C=CC(Oc2c(c2c1ccc(=O)o2)OC)(C)C	UNPD27285	QZUNAFWZEXJWGD-UHFFFAOYSA-N	#N/A	#N/A	0.0430777	1
CDK5	158883	CDK5	Oc1cccc2c1cc1[nH]c(=O)c3c1c2c1OCOc1c3	UNPD107882	OVACCXPNQSWBBB-UHFFFAOYSA-N	#N/A	#N/A	0.0241758	1
HSD17B10	175540	HSD17B10	O[C@H](COc1ccc(cc1)CC(=O)N)CNC(C)C	TCMTW19767	METKIMKYRPQLGS-LBPRGKRZSA-N	#N/A	#N/A	0.00857933	1
SENP6	182362	SENP6	Oc1ccc(cc1)c1cc(=O)c2c(o1)ccc(c2)O	UNPD66592	FFULTBKXWHYHFQ-UHFFFAOYSA-N	#N/A	#N/A	0.0162306	1
KDM7A	252439	KDM7A	ONC(=O)CCC(=O)O	UNPD196192	AGEUQNZXCIVHPB-UHFFFAOYSA-N	#N/A	#N/A	0.0197291	1
APEX1	361510	APEX1	Oc1cc(O)c2c(c1)C(=O)c1c(C2=O)c(O)cc(c1)C(=O)O	UNPD109351	ZJXVNNSMRGTDBI-UHFFFAOYSA-N	#N/A	#N/A	0.0162439	1
ADRA2B	441082	ADRA2B	CN([C@H]1CC[C@]2(C(=CC[C@@H]3[C@@H]2CC[C@]24[C@H]3CC[C@@H]4[C@@H](N(C2)C)C)C1)C)C	ATCMD3958	GPLGAQQQNWMVMM-MYAJQUOBSA-N	#N/A	#N/A	0.0142809	1
PPM1B	445434	PPM1B	CO[C@H]([C@H](/C=C(/C=C/[C@@H]1NC(=O)[C@H](CCCNC(=N)N)NC(=O)[C@@H](C)[C@@H](NC(=O)[C@H](CC(C)C)NC(=O)[C@H](NC(=O)C(=C)N(C(=O)CC[C@@H](NC(=O)[C@H]1C)C(=O)O)C)C)C(=O)O)\C)C)Cc1ccccc1	UNPD220416	ZYZCGGRZINLQBL-GWRQVWKTSA-N	#N/A	#N/A	0.0181209	1
ADRA2A	446220	ADRA2A	COC(=O)[C@H]1C(C[C@H]2N([C@@H]1CC2)C)OC(=O)c1ccccc1	TCMTW48737	ZPUCINDJVBIVPJ-LJISPDSOSA-N	DB00907	approved; illicit	0.0208622	1
FABP4	446284	FABP4	CC/C=C\C/C=C\C/C=C\C/C=C\C/C=C\CCCC(=O)O	UNPD187471	JAZBEHYOTPTENJ-JLNKQSITSA-N	DB00159	approved; nutraceutical	0.015201	1
PSIP1	638759	PSIP1	OCCC(=O)c1ccc(cc1)O	UNPD160812	LTEPZFZSPZASKJ-UHFFFAOYSA-N	#N/A	#N/A	0.0190728	1
MMP12	795855	MMP12	O=C(/C=C/c1ccccc1)NCCc1ccccc1	UNPD176791	BOSUEWCVNFFBGV-VAWYXSNFSA-N	#N/A	#N/A	0.0240814	1
CA2	3083616	CA2	COc1c(OC)cc2c(c1O)oc(=O)cc2	UNPD18422	QNFBKOHHLAWWTC-UHFFFAOYSA-N	#N/A	#N/A	0.0431386	1
CA12	3083928	CA12	COc1c(OC)c(OC)cc2c1oc(=O)cc2	UNPD100922	RAYQKHLZHPFYEJ-UHFFFAOYSA-N	#N/A	#N/A	0.0660427	1
POLB	5152597	POLB	Oc1cc2OC(C(Cc2c(c1)O)OC(=O)c1cc(O)c(c(c1)O)O)c1cc(O)c(c(c1c1c(cc(c(c1O)O)O)C1Oc2cc(O)cc(c2CC1OC(=O)c1cc(O)c(c(c1)O)O)O)O)O	UNPD7642	YUULFXAQUWEYNP-UHFFFAOYSA-N	#N/A	#N/A	0.0119832	1
CA1	5280567	CA1	Oc1ccc2c(c1)oc(=O)cc2C	UNPD85461	HSHNITRMYYLLCV-UHFFFAOYSA-N	DB07118	experimental	0.0240798	1
FABP4	5280581	FABP4	CCCCC/C=C\C/C=C\C/C=C\CCCCCCC(=O)O	UNPD106657	HOBAELRKJCKHQD-QNEBEIHSSA-N	DB00154	approved; nutraceutical	0.01524	1
PLG	5280637	PLG	OC[C@H]1O[C@@H](Oc2cc(O)c3c(c2)oc(cc3=O)c2ccc(c(c2)O)O)[C@@H]([C@H]([C@@H]1O)O)O	TCMID7757	PEFNSGRTCBGNAN-QNDFHXLGSA-N	#N/A	#N/A	0.0087874	1
MCL1	5280681	MCL1	COc1c(oc2c(c1=O)c(O)cc(c2)O)c1ccc(c(c1)O)O	UNPD246	WEPBGSIAWZTEJR-UHFFFAOYSA-N	#N/A	#N/A	0.0105658	1
ALPPL2	5280804	ALPPL2	OC[C@H]1O[C@@H](Oc2c(oc3c(c2=O)c(O)cc(c3)O)c2ccc(c(c2)O)O)[C@@H]([C@H]([C@@H]1O)O)O	TCMID7789	OVSQVDMCBVZWGM-QSOFNFLRSA-N	#N/A	#N/A	0.0112601	1
THPO	5280805	THPO	Oc1cc(O)c2c(c1)oc(c(c2=O)O[C@@H]1O[C@H](CO[C@@H]2O[C@@H](C)[C@@H]([C@H]([C@H]2O)O)O)[C@H]([C@@H]([C@H]1O)O)O)c1ccc(c(c1)O)O	TCMID8896	IKGXIBQEEMLURG-NVPNHPEKSA-N	#N/A	#N/A	0.0106807	1
HSD17B10	5281416	HSD17B10	O=c1ccc2c(o1)cc(c(c2)O)O	UNPD155340	ILEDWLMCKZNDJK-UHFFFAOYSA-N	#N/A	#N/A	0.010974	1
TP53	5281417	TP53	OC[C@H]1O[C@@H](Oc2cc3ccc(=O)oc3cc2O)[C@@H]([C@H]([C@@H]1O)O)O	TCMID7497	XHCADAYNFIFUHF-TVKJYDDYSA-N	#N/A	#N/A	0.0123121	1
APEX1	5281673	APEX1	Oc1cc(O)c2c(c1)oc(c(c2=O)O[C@@H]1O[C@@H](C)[C@@H]([C@H]([C@H]1O)O)O)c1cc(O)c(c(c1)O)O	TCMTW22637	DCYOADKBABEMIQ-OWMUPTOHSA-N	#N/A	#N/A	0.0122677	1
LMNA	5282060	LMNA	Oc1cc(O)c2c3c1C(=O)C(c1c3c3c(C2=O)c(O)cc(c3c(c1)O)C)(C)C	UNPD75446	ABLACSIRCKEUOB-UHFFFAOYSA-N	#N/A	#N/A	0.00936142	1
APEX1	5315615	APEX1	O=C(OC(C(=O)O)Cc1ccc(c(c1)O)O)/C=C/c1ccc(c(c1)O)O	UNPD123218	DOUMFZQKYFQNTF-ZZXKWVIFSA-N	#N/A	#N/A	0.0171064	1
CA1	5316302	CA1	COc1c(O)ccc2c1oc(=O)cc2	UNPD162815	HAQWEMHXSIRYBE-UHFFFAOYSA-N	#N/A	#N/A	0.0556986	1
CA2	5321265	CA2	COc1c2C=CC(Oc2c2c(c1/C=C/C(=C)C)oc(=O)cc2)(C)C	UNPD136832	AKGXRWOSGJLLNQ-VOTSOKGWSA-N	#N/A	#N/A	0.0430828	1
NQO2	5362868	NQO2	OC1CC2C(C1)/C=C/CCCC(OC(=O)/C=C/C2O)C	UNPD11285	KQNZDYYTLMIZCT-GFGVWQOPSA-N	#N/A	#N/A	0.00863228	1
ADORA1	5372720	ADORA1	O=c1[nH]c2nc3ccccc3nc2c(=O)[nH]1	UNPD135664	HAUGRYOERYOXHX-UHFFFAOYSA-N	#N/A	#N/A	0.02761	1
ALDH1A1	5377381	ALDH1A1	Oc1cc(O)c2c(c1)occ(c2=O)c1ccccc1	UNPD70937	PJJGZPJJTHBVMX-UHFFFAOYSA-N	#N/A	#N/A	0.0117599	1
CA7	5491996	CA7	COc1cc2c(c(c1OC)O)CCn1c2c(c2ccc(c(c2)O)OC)c2c1c(=O)oc1c2cc(OC)c(c1)O	UNPD131335	JAYUXAMNSNMXCO-UHFFFAOYSA-N	#N/A	#N/A	0.0576685	1
HDAC2	6400741	HDAC2	O/N=C(/C(=O)NCCSSCCNC(=O)/C(=N/O)/Cc1ccc(c(c1)Br)O)\Cc1ccc(c(c1)Br)O	UNPD76749	LMAFSGDNHVBIHU-XUIWWLCJSA-N	#N/A	#N/A	0.0135856	1
MCL1	6426860	MCL1	OCC1OC(C(C(C1O)O)O)c1c(O)cc2c(c1O)c(=O)cc(o2)c1ccc(c(c1)O)O	UNPD117721	ODBRNZZJSYPIDI-UHFFFAOYSA-N	#N/A	#N/A	0.0132545	1
CA4	6942100	CA4	OC(=O)[C@H](Cc1ccc(cc1)O)N	TCMSP56	OUYCCCASQSFEME-QMMMGPOBSA-N	DB00135	approved; nutraceutical	0.0356716	1
PTPRC	9847548	PTPRC	C[C@@H]1CC[C@]2([C@@H]([C@H]1C)C1=CC(=O)[C@H]3[C@@]([C@@]1(CC2)C)(C)CC[C@@H]1[C@]3(C)CC[C@H]([C@]1(C)C(=O)O)O)C	TCMTW18437	YIMHGPSYDOGBPI-YZCVQEKWSA-N	#N/A	#N/A	0.014766	1
MAPT	11644907	MAPT	O=C1C=CC(C=C1)(O)c1cc(=O)c2c(o1)cc(cc2O)O	UNPD123626	DLMOVPAUHQQYHA-UHFFFAOYSA-N	#N/A	#N/A	0.0066983	1
MCL1	11726019	MCL1	COc1cc(ccc1O)c1cc(=O)c2c(o1)c(O)c(c(c2O)OC)OC	UNPD111254	CSDGLNFYKPCMSZ-UHFFFAOYSA-N	#N/A	#N/A	0.0149248	1
MAPT	12004631	MAPT	O=c1oc(C(C)C)c2c(c1)[C@@]1(C)[C@H](O)[C@H](O)C[C@]3(C1[C@@H]([C@@H]2O)OC3=O)C	TCMID5260	AEGWYWSJGKOLGB-LNVBUOCNSA-N	#N/A	#N/A	0.00917515	1
CA7	14057643	CA7	COc1ccc2c(c1C(C(=C)C)COC(=O)c1cccnc1)oc(=O)cc2	UNPD58912	FACFRLQKTLEDNI-UHFFFAOYSA-N	#N/A	#N/A	0.0575688	1
HBB	14314897	HBB	CC1CCCC=CC(=O)c2c(CC(=O)O1)cc(O)cc2O	UNPD58523	AVIRMQMUBGNCKS-GQCTYLIASA-N	#N/A	#N/A	0.00883046	1
CA2	15118768	CA2	COc1c2C=CC(Oc2c2c(c1/C=C/C(O)(C)C)oc(=O)cc2)(C)C	UNPD49047	AXYRILDCSATJFU-CSKARUKUSA-N	#N/A	#N/A	0.043083	1
PDE5	16129778	PDE5	O=C(c1cc(O)c(c(c1)OC(=O)c1cc(O)c(c(c1)O)O)O)O[C@@H]1[C@@H](COC(=O)c2cc(O)c(c(c2)OC(=O)c2cc(O)c(c(c2)O)O)O)O[C@H]([C@@H]([C@H]1OC(=O)c1cc(O)c(c(c1)OC(=O)c1cc(O)c(c(c1)O)O)O)OC(=O)c1cc(O)c(c(c1)OC(=O)c1cc(O)c(c(c1)O)O)O)OC(=O)c1cc(O)c(c(c1)OC(=O)c1cc(O)c(c(c1)O)O)O	UNPD224351	LRBQNJMCXXYXIU-PPKXGCFTSA-N	#N/A	#N/A	0.0263719	1
APEX1	16196968	APEX1	Cc1cc(O)c(c(c1)O)Oc1cc(C)cc(c1O)O	UNPD135948	SXPZFHCIUAADLD-UHFFFAOYSA-N	#N/A	#N/A	0.00858814	1
EIF4G1	16218404	EIF4G1	OC[C@H]1OC(Oc2cccc3c2C(=O)c2c([C@@H]3[C@H]3c4cc(cc(c4C(=O)c4c3cccc4O[C@@H]3O[C@H](CO)[C@H]([C@@H]([C@H]3O)O)O)O)C(=O)O)cc(cc2O)C(=O)O)[C@@H]([C@H]([C@@H]1O)O)O	TCMID7297	IPQVTOJGNYVQEO-GTCVFCFLSA-N	#N/A	#N/A	0.0192258	1
APEX1	16681750	APEX1	OCC1OC(OC(CC(=O)O)CCc2ccccc2)C(C(C1O)O)O	UNPD137791	HRYIDVZLDQBLFF-UHFFFAOYSA-N	#N/A	#N/A	0.0226351	1
CA7	54678503	CA7	O/C(=C(\C(=O)O)/O)/C(=O)O	UNPD11211	BZCOSCNPHJNQBP-OWOJBTEDSA-N	#N/A	#N/A	0.0483499	1
POLB	58663891	POLB	OC(=O)C(Cc1ccc(c(c1)O)O)N	UNPD105928	WTDRDQBEARUVNC-UHFFFAOYSA-N	#N/A	#N/A	0.0116735	1
MMP2	70688393	MMP2	COC(=O)[C@@H](Cc1ccc(c(c1)O)O)OC(=O)/C=C/c1ccc(c2c1[C@H](C(=O)OC)[C@H](O2)c1ccc(c(c1)O)O)O	ATCMD6351	YAXTXMBBIHBGPZ-ZBBBDWFHSA-N	#N/A	#N/A	0.0463489	1
AXL	76335685	AXL	COc1cc2nc(oc2c(c1O)C[C@]1(C)[C@@H](C)CC[C@@]2([C@H]1CCC=C2C)C)C	UNPD211315	ATQVAIUSAHRLDF-KSVBPBMVSA-N	#N/A	#N/A	0.0312342	1
KDM4E	547	KDM4E	OC(=O)Cc1ccc(c(c1)O)O	UNPD147290	CFFZDZCDUFSOFZ-UHFFFAOYSA-N	DB01702	experimental	0.0086893	1
MAPT	2202	MAPT	Oc1cccc2c1C(=O)c1c(C2)cccc1O	UNPD78532	NUZWLKWWNNJHPT-UHFFFAOYSA-N	#N/A	#N/A	0.00887628	1
LMNA	2244	LMNA	CC(=O)Oc1ccccc1C(=O)O	UNPD585	BSYNRYMUTXBXSQ-UHFFFAOYSA-N	DB00945	approved; vet_approved	0.00586811	1
SLC10A1	2249	SLC10A1	OC(COc1ccc(cc1)CC(=O)N)CNC(C)C	TCMID10431	METKIMKYRPQLGS-UHFFFAOYSA-N	DB00335	approved	0.0109256	1
ADORA2A	3152	ADORA2A	COc1cc2c(cc1OC)CC(C2=O)CC1CCN(CC1)Cc1ccccc1	UNPD172153	ADEBPBSSDYVVLD-UHFFFAOYSA-N	DB00843	approved	0.00731748	1
SLCO1B3	3488	SLCO1B3	COc1ccc(cc1C(=O)NCCc1ccc(cc1)S(=O)(=O)NC(=O)NC1CCCCC1)Cl	TCMID1014	ZNNLBTZKUZBEKO-UHFFFAOYSA-N	DB01016	approved	0.00934092	1
MAPT	3637	MAPT	NNc1nncc2c1cccc2	UNPD156717	RPTUSVTUFVMDQK-UHFFFAOYSA-N	DB01275	approved	0.00906562	1
CHRNB2	3845	CHRNB2	OC(=O)c1cc(O)c2c(n1)cccc2	UNPD34289	HCZHHEIFKROPDY-UHFFFAOYSA-N	#N/A	#N/A	0.00921435	1
CASP7	4650	CASP7	O=C1C=CC(=O)C=C1	UNPD191854	AZQWKYJCGOJGHM-UHFFFAOYSA-N	#N/A	#N/A	0.0116453	1
ADRA1A	4786	ADRA1A	OC(c1ccccc1)C(N)C	UNPD17979	DLNKOYKMWOXYQA-UHFFFAOYSA-N	#N/A	#N/A	0.036243	1
KDR	5279	KDR	CNC1CC2OC(C1OC)(C)n1c3ccccc3c3c1c1n2c2ccccc2c1c1c3CNC1=O	UNPD149684	HKSZLNNOFSGOKW-UHFFFAOYSA-N	#N/A	#N/A	0.0186578	1
P2RY4	6083	P2RY4	O[C@@H]1[C@H](O)[C@H](O[C@H]1n1cnc2c1ncnc2N)COP(=O)(O)O	TCMID7216	UDMBCSSLTHHNCD-KQYNXXCUSA-N	DB00131	approved; nutraceutical	0.0213374	1
HTR1E	6089	HTR1E	CN(CCc1c[nH]c2c1cccc2)C	UNPD17062	DMULVCHRPCFFGV-UHFFFAOYSA-N	DB01488	experimental; illicit	0.0143566	1
CA13	7424	CA13	Oc1cc(O)cc(c1)C(=O)O	UNPD180042	UYEMGAFJOZZIFP-UHFFFAOYSA-N	#N/A	#N/A	0.0248382	1
CA13	7456	CA13	COC(=O)c1ccc(cc1)O	UNPD166151	LXCFILQKKLGQFO-UHFFFAOYSA-N	#N/A	#N/A	0.0248264	1
CA13	9016	CA13	COc1ccc(cc1)OC	UNPD170938	OHBQPCCCRFSCAX-UHFFFAOYSA-N	#N/A	#N/A	0.0249951	1
CA13	9338	CA13	OC(=O)c1c(O)cccc1O	UNPD106057	AKEUNCKRJATALU-UHFFFAOYSA-N	#N/A	#N/A	0.0248262	1
KAT2B	10205	KAT2B	CC1=CC(=O)c2c(C1=O)cccc2O	UNPD44441	VCMMXZQDRFWYSE-UHFFFAOYSA-N	#N/A	#N/A	0.0163512	1
CA13	11568	CA13	Nc1cccc(c1)O	UNPD174900	CWLKGDAVCFYWJK-UHFFFAOYSA-N	#N/A	#N/A	0.024741	1
CA13	15109	CA13	COc1cccc(c1C(=O)O)OC	UNPD8709	MBIZFBDREVRUHY-UHFFFAOYSA-N	#N/A	#N/A	0.0248867	1
CA13	16523	CA13	COC(=O)c1ccc(cc1O)O	UNPD75412	IIFCLXHRIYTHPV-UHFFFAOYSA-N	#N/A	#N/A	0.0248416	1
CA13	20098	CA13	CCOC(=O)c1cc(O)cc(c1)O	UNPD68651	APHYVLPIZUVDTK-UHFFFAOYSA-N	#N/A	#N/A	0.0248216	1
SENP8	26248	SENP8	CC(=O)Oc1cc(cc2c1C(=O)c1c(C2=O)cccc1OC(=O)C)C(=O)O	UNPD36930	TYNLGDBUJLVSMA-UHFFFAOYSA-N	#N/A	#N/A	0.0127706	1
PRKACA	27924	PRKACA	CCCCCCCCCCCCCC(=O)O[C@@H]1[C@@H](C)[C@@]2(O)C([C@H]3[C@]1(OC(=O)C)C3(C)C)C=C(C[C@]1([C@H]2C=C(C1=O)C)O)CO	ATCMD17130	PHEDXBVPIONUQT-RGYGYFBISA-N	#N/A	#N/A	0.0267599	1
CA12	65188	CA12	CC1(C)C=Cc2c(O1)cc1c(c2)ccc(=O)o1	UNPD101297	QOTBQNVNUBKJMS-UHFFFAOYSA-N	#N/A	#N/A	0.0353621	1
MAPT	65752	MAPT	O=c1c2ccccc2nc2n1CCc1c2[nH]c2c1cccc2	UNPD118620	ACVGWSKVRYFWRP-UHFFFAOYSA-N	#N/A	#N/A	0.00543156	1
CA2	66548	CA2	COc1c2C=CC(Oc2cc2c1ccc(=O)o2)(C)C	UNPD45459	JSJIIHRNDMLJGK-UHFFFAOYSA-N	#N/A	#N/A	0.0356586	1
CA13	67284	CA13	COc1ccc(c(c1)OC)OC	UNPD90305	AGIQIOSHSMJYJP-UHFFFAOYSA-N	#N/A	#N/A	0.0250273	1
UBE2I	73157	UBE2I	CCCCCc1c2Oc3cc(OC)cc(c3C(=O)Oc2cc(c1C(=O)O)O)C(=O)CCCC	UNPD2197	JHEWMLHQNRHTQX-UHFFFAOYSA-N	#N/A	#N/A	0.0183604	1
TP53	73453	TP53	O=C([C@H]1CN(C)[C@H]2C(=C1)c1cccc3c1c(C2)c[nH]3)N[C@@]1(O[C@@]2(N(C1=O)[C@@H](C(C)C)C(=O)N1[C@H]2CCC1)O)C(C)C	ATCMD7214	UJYGDMFEEDNVBF-OGGGUQDZSA-N	#N/A	#N/A	0.0101617	1
PTGS1	73549	PTGS1	O=C1c2nc3ccccc3c(=O)n2c2c1cccc2	UNPD139994	VQQVWGVXDIPORV-UHFFFAOYSA-N	#N/A	#N/A	0.0106232	1
CA13	75076	CA13	COC(=O)c1cc(O)cc(c1)O	UNPD163106	RNVFYQUEEMZKLR-UHFFFAOYSA-N	#N/A	#N/A	0.0248513	1
CA13	75077	CA13	COC(=O)c1cc(O)ccc1O	UNPD35540	XGDPKUKRQHHZTH-UHFFFAOYSA-N	#N/A	#N/A	0.0248542	1
CA13	77547	CA13	CCOC(=O)c1ccc(c(c1)O)O	UNPD77968	KBPUBCVJHFXPOC-UHFFFAOYSA-N	#N/A	#N/A	0.0248225	1
CA13	77548	CA13	CCOC(=O)c1cc(O)ccc1O	UNPD123062	GCUPAENRSCPHBM-UHFFFAOYSA-N	#N/A	#N/A	0.0248264	1
PPARD	77999	PPARD	O=C1NC(=O)C(S1)Cc1ccc(cc1)OCCN(c1ccccn1)C	UNPD80388	YASAKCUCGLMORW-UHFFFAOYSA-N	DB00412	approved; investigational	0.0127079	1
SLC47A1	89594	SLC47A1	CN1CCC[C@H]1c1cccnc1	ATCMD15476	SNICXCGAKADSCV-JTQLQIEISA-N	#N/A	#N/A	0.00824926	1
EIF4G1	91440	EIF4G1	OC[C@H]1O[C@@H](Oc2cccc3c2C(=O)c2c([C@@H]3[C@@H]3c4cc(cc(c4C(=O)c4c3cccc4O[C@@H]3O[C@H](CO)[C@H]([C@@H]([C@H]3O)O)O)O)C(=O)O)cc(cc2O)C(=O)O)[C@@H]([C@H]([C@@H]1O)O)O	TCMTW39508	IPQVTOJGNYVQEO-AIFLABODSA-N	#N/A	#N/A	0.0153812	1
ADRA1B	107786	ADRA1B	CC(C(=O)c1ccccc1)N	UNPD131656	PUAQLLVFLMYYJJ-UHFFFAOYSA-N	#N/A	#N/A	0.0134132	1
CHRM4	154417	CHRM4	OC[C@H](c1ccccc1)C(=O)OC1C[C@@H]2CC[C@H](C1)N2C	TCMID1594	RKUNBYITZUJHSG-VFSICIBPSA-N	#N/A	#N/A	0.030508	1
CA2	179620	CA2	O=CC(=C(C)C)c1c(OC)ccc2c1oc(=O)cc2	UNPD11687	PBAZKMWQUBDDLZ-UHFFFAOYSA-N	#N/A	#N/A	0.0356988	1
GPR55	282529	GPR55	C=C1C(=O)O[C@@H]2[C@@H]1C[C@]1(C)C(=O)C=C[C@H]1[C@@H](C2)C	ATCMD1764	OSSDUQKWVVZIGP-SCGWIAOYSA-N	#N/A	#N/A	0.0104656	1
CA13	287064	CA13	COC(=O)c1ccc(c(c1)O)O	UNPD152829	CUFLZUDASVUNOE-UHFFFAOYSA-N	#N/A	#N/A	0.0248464	1
CA2	439514	CA2	OC[C@H]1O[C@@H](Oc2cc3oc(=O)ccc3cc2OC)[C@@H]([C@H]([C@@H]1O)O)O	TCMTW20029	SGTCGCCQZOUMJJ-YMILTQATSA-N	#N/A	#N/A	0.0356285	1
FASN	489941	FASN	OC(=O)[C@]12CC[C@@]3([C@@H](C2=CC(CC1)(C)C)CC[C@H]1[C@@]3(C)CC[C@@H]2[C@]1(C)CCC(=O)C2(C)C)C	ATCMD14934	UMYJVVZWBKIXQQ-QALSDZMNSA-N	#N/A	#N/A	0.0215378	1
CA13	519869	CA13	COC(=O)c1c(O)cccc1O	UNPD123518	WCQZCKUNZVMBDC-UHFFFAOYSA-N	#N/A	#N/A	0.0248432	1
CA13	676946	CA13	CCOC(=O)/C=C/c1ccc(cc1)O	UNPD35890	ZOQCEVXVQCPESC-VMPITWQZSA-N	#N/A	#N/A	0.0248156	1
CA13	821388	CA13	CCOC(=O)c1ccc(cc1O)O	UNPD129258	BRDIPNLKURUXCU-UHFFFAOYSA-N	#N/A	#N/A	0.0248175	1
ALDH1A1	3083585	ALDH1A1	Oc1ccc(c2c1cccc2O)O	UNPD40864	NHEVNUARLCWEED-UHFFFAOYSA-N	#N/A	#N/A	0.00840234	1
CA2	5273568	CA2	OC[C@H]1O[C@@H](Oc2c(O)c(OC)cc3c2oc(=O)cc3)[C@@H]([C@H]([C@@H]1O)O)O	TCMTW49983	CRSFLLTWRCYNNX-QBNNUVSCSA-N	#N/A	#N/A	0.0356272	1
APEX1	5281643	APEX1	OC[C@H]1O[C@@H](Oc2c(oc3c(c2=O)c(O)cc(c3)O)c2ccc(c(c2)O)O)[C@@H]([C@H]([C@H]1O)O)O	TCMTW18214	OVSQVDMCBVZWGM-DTGCRPNFSA-N	#N/A	#N/A	0.00705431	1
CA7	5281894	CA7	Oc1ccc2c(c1)oc(cc2=O)c1ccccc1	UNPD42289	MQGPSCMMNJKMHQ-UHFFFAOYSA-N	#N/A	#N/A	0.0194831	1
MAPT	5282073	MAPT	Oc1ccc(cc1)c1cc(=O)c2c(o1)cc(cc2)O	UNPD164445	LCAWNFIFMLXZPQ-UHFFFAOYSA-N	#N/A	#N/A	0.00679394	1
APEX1	5316647	APEX1	O=C(OC1C(O)CC(CC1O)(OC(=O)/C=C/c1ccc(c(c1)O)O)C(=O)O)/C=C/c1ccc(c(c1)O)O	UNPD129877	IYXQRCXQQWUFQV-FCXRPNKRSA-N	#N/A	#N/A	0.0153322	1
CA2	5317485	CA2	COc1cc2oc(=O)ccc2c2c1C=CC(O2)(C)C	UNPD52932	WTBVBNPZXAQTHI-UHFFFAOYSA-N	#N/A	#N/A	0.0356586	1
CA13	5319562	CA13	COC(=O)/C=C/c1ccc(cc1)O	UNPD26092	NITWSHWHQAQBAW-QPJJXVBHSA-N	#N/A	#N/A	0.0248387	1
HRAS	5320418	HRAS	OCc1c2OC(=O)c3c(Oc2c2c(c1O)C(=O)OC2O)c(C=O)c(cc3C)O	UNPD167182	QQTKVXCQLZIJPP-UHFFFAOYSA-N	#N/A	#N/A	0.0189517	1
CDK5	5327723	CDK5	O=c1[nH]c(=O)c2c1c1c3ccccc3[nH]c1c1c2c2ccccc2[nH]1	UNPD52013	KAJXOWFGKYKMMZ-UHFFFAOYSA-N	#N/A	#N/A	0.0194561	1
MAPT	5353992	MAPT	CCCCCC(=O)OC1C(OC(=O)/C(=C/C)/C)C(=C2C1C(C)(OC(=O)C)CC(C1(C2OC(=O)C1(C)O)O)OC(=O)CCC)C	CNPD31006	LXWLOFYIORKNSA-GZTJUZNOSA-N	#N/A	#N/A	0.00775156	1
CA2	5358858	CA2	C/C(=C\COc1ccc2c(c1)oc(=O)cc2)/CCC(=O)C(O)(C)C	UNPD97513	YSRYKTUWDVLRLA-JLHYYAGUSA-N	#N/A	#N/A	0.0356221	1
HTR7	5359000	HTR7	N=C1N(C)C(=O)/C(=C\c2c[nH]c3c2cccc3)/N1C	UNPD74505	AZGOVLGMSGAOMP-FZYUQVBKSA-N	#N/A	#N/A	0.0102198	1
HSD17B10	5488919	HSD17B10	COc1c(O)cc2c3c1oc(=O)c1c3c(oc2=O)c(c(c1)O)OC	UNPD183645	KLAGYIBJNXLDTL-UHFFFAOYSA-N	#N/A	#N/A	0.0118824	1
CA2	5910585	CA2	O=c1ccc2c(o1)cc(cc2)OC/C=C(/C1=CC(=O)C(O1)(C)C)\C	UNPD169486	OUTLLBZGJYDUQE-XYOKQWHBSA-N	#N/A	#N/A	0.0299218	1
CA14	6482974	CA14	COc1cc(OC)c2c(c1OC)oc(=O)cc2	UNPD166066	MSFXSDYNQKVMTJ-UHFFFAOYSA-N	#N/A	#N/A	0.0348531	1
CA12	6971048	CA12	N[C@@H](C(=O)O)Cc1c[nH]cn1	TCMSP70	HNDVDQJCIGZPNO-RXMQYKEDSA-N	#N/A	#N/A	0.0431808	1
POLB	7061393	POLB	OC(=O)Cc1c[nH]c2c1c(O)ccc2	UNPD59877	IGOSTOCJEXIQIA-UHFFFAOYSA-N	#N/A	#N/A	0.0156926	1
CCND1	10356352	CCND1	COc1c(O)cc2c3c1c1cc(O)ccc1cc3[nH]c2=O	UNPD38075	PFXGXKFPTAJYHV-UHFFFAOYSA-N	#N/A	#N/A	0.0211221	1
APEX1	12309904	APEX1	O=C1CC(Oc2c1ccc(c2O)O)c1ccc(c(c1)O)O	UNPD28677	ZPVNWCMRCGXRJD-UHFFFAOYSA-N	#N/A	#N/A	0.0174552	1
MAP3K8	15965448	MAP3K8	O/N=C/1\Cc2cc(Br)c(c(c2)Br)Oc2cc(C/C(=N\O)/C(=O)NCCc3cc(c(Oc4cc(CCNC1=O)ccc4O)c(Br)c3)Br)cc(c2O)Br	UNPD108428	AJMQODPAUXMBSS-DCRHPOARSA-N	#N/A	#N/A	0.0241039	1
FLT1	24949856	FLT1	Oc1ccc(cc1O)CC1=Cc2c(OC1)c(O)c(cc2)O	UNPD57306	YXQXLHSRJUFMFD-UHFFFAOYSA-N	#N/A	#N/A	0.0275223	1
MAPT	54676038	MAPT	O=c1oc2ccccc2c(c1Cc1c(=O)oc2c(c1O)cccc2)O	UNPD91071	DOBMPNYZJYQDGZ-UHFFFAOYSA-N	DB00266	approved	0.0074621	1
CA2	71720036	CA2	OC/C(=C/Cc1cc2ccc(=O)oc2cc1O)/C	UNPD206004	JUOLTTLEQHQQED-XNWCZRBMSA-N	#N/A	#N/A	0.0356773	1
POLB	5281647|5358385	POLB	OCC1OC(C(C(C1O)O)O)c1c(O)cc2c(c1O)c(=O)c1c(o2)cc(c(c1)O)O	HIT027|UNPD11978	AEDDIBAIWPIIBD-UHFFFAOYSA-N|AEDDIBAIWPIIBD-ZJKJAXBQSA-N	#N/A	#N/A	0.0202733	1
CHRFAM7A	187	CHRFAM7A	CC(=O)OCC[N+](C)(C)C	UNPD178395	OIPILFWXSMYKGL-UHFFFAOYSA-N	DB03128	approved	0.0171357	1
UBE2I	864	UBE2I	OC(=O)CCCCC1SSCC1	UNPD59548	AGBQKNBQESQNJD-UHFFFAOYSA-N	DB00166	approved; nutraceutical	0.0206084	1
PPARG	985	PPARG	CCCCCCCCCCCCCCCC(=O)O	UNPD142046	IPCSVZSSVZVIGE-UHFFFAOYSA-N	DB03796	experimental	0.0268893	1
CA1	996	CA1	Oc1ccccc1	UNPD176645	ISWSIDIOOBJBQZ-UHFFFAOYSA-N	DB03255	approved; experimental	0.0379265	1
CA2	1103	CA2	NCCCNCCCCNCCCN	UNPD44292	PFNFFQXMRSDOHW-UHFFFAOYSA-N	DB00127	approved; nutraceutical	0.0253748	1
nAChRA7	1204	nAChRA7	Clc1ccc(cn1)C1CC2NC1CC2	UNPD151888	NLPRAJRHRHZCQQ-UHFFFAOYSA-N	#N/A	#N/A	0.0277992	1
CA9	1983	CA9	CC(=O)Nc1ccc(cc1)O	UNPD57789	RZVAJINKPMORJF-UHFFFAOYSA-N	DB00316	approved	0.0366955	1
ADRA1A	4946	ADRA1A	OC(COc1cccc2c1cccc2)CNC(C)C	UNPD158788	AQHHHDLHHXJYJD-UHFFFAOYSA-N	DB00571	approved; investigational	0.0123645	1
PFKFB3	6022	PFKFB3	O[C@@H]1[C@@H](COP(=O)(OP(=O)(O)O)O)O[C@H]([C@@H]1O)n1cnc2c1ncnc2N	ATCMD623	XTWYTFMLZFPYCI-KQYNXXCUSA-N	#N/A	#N/A	0.0116602	1
CA7	6140	CA7	N[C@H](C(=O)O)Cc1ccccc1	TCMID7433	COLNVLDHVKWLRT-QMMMGPOBSA-N	DB00120	approved; nutraceutical	0.0423679	1
CA6	7121	CA6	COc1cc(ccc1OC)C(=O)O	UNPD92732	DAUAQNGYDSHRET-UHFFFAOYSA-N	#N/A	#N/A	0.0318384	1
CA13	8434	CA13	CCOC(=O)c1ccc(cc1)O	UNPD115503	NUVBSKCKDOMJSU-UHFFFAOYSA-N	#N/A	#N/A	0.0212759	1
CA4	8739	CA4	OC(=O)c1ccc(cc1)S(=O)(=O)N	UNPD171481	UCAGLBKTLXCODC-UHFFFAOYSA-N	#N/A	#N/A	0.0254389	1
PTPRC	10494	PTPRC	O[C@H]1CC[C@]2([C@H](C1(C)C)CC[C@@]1([C@@H]2CC=C2[C@@]1(C)CC[C@@]1([C@H]2CC(C)(C)CC1)C(=O)O)C)C	ATCMD15996	MIJYXULNPSFWEK-GTOFXWBISA-N	#N/A	#N/A	0.00984888	1
CA12	66827	CA12	OB(c1ccccc1)O	UNPD115380	HXITXNWTGFUOAU-UHFFFAOYSA-N	DB01795	experimental	0.0390699	1
TNKS2	77793	TNKS2	COc1ccc(cc1)c1cc(=O)c2c(o1)cccc2	UNPD73366	OMICQBVLCVRFGN-UHFFFAOYSA-N	#N/A	#N/A	0.0118021	1
KDM4E	81124	KDM4E	O=C1C(=CC(=O)c2c1cccc2)Nc1ccccc1	UNPD157627	OPECBHGHSFBITB-UHFFFAOYSA-N	#N/A	#N/A	0.00602058	1
GABRA2	105078	GABRA2	CCOC(=O)c1ncc2c(c1)c1ccccc1[nH]2	UNPD89951	KOVRZNUMIKACTB-UHFFFAOYSA-N	#N/A	#N/A	0.0385196	1
VCP	161532	VCP	O=C1NCCCCCN(O)C(=O)CCC(=O)NCCCCCN(C(=O)CCC(=O)NCCCCCN(C(=O)CC1)O)O	UNPD17525	NHKCCADZVLTPPO-UHFFFAOYSA-N	#N/A	#N/A	0.0298905	1
DNMT1	301798	DNMT1	Oc1ccc(cc1)C1CC(=O)c2c(O1)cc(c(c2O)C)O	UNPD113891	SLFZBNOERHGNMI-UHFFFAOYSA-N	#N/A	#N/A	0.0105889	1
PSIP1	356768	PSIP1	COc1cc2c(cc1O)ccc1c2c(O)c(c(c1)OC)OC	UNPD74556	RFECGRRPIZBKMD-UHFFFAOYSA-N	#N/A	#N/A	0.0147479	1
MAPT	415267	MAPT	O=n1ccccc1S[Zn]Sc1ccccn1=O	UNPD29944	OTPSWLRZXRHDNX-UHFFFAOYSA-L	#N/A	#N/A	0.00743643	1
KDM4E	4263901	KDM4E	Oc1cc2OC(C(Cc2c(c1)O)O)c1cc2c(cc(c(c2c(=O)c(c1)O)O)O)C1Oc2cc(O)cc(c2CC1O)O	UNPD13475	IPMYMEWFZKHGAX-UHFFFAOYSA-N	#N/A	#N/A	0.0125573	1
CA2	5273569	CA2	COc1cc2ccc(=O)oc2c(c1O)O	UNPD161071	HAVWRBANWNTOJX-UHFFFAOYSA-N	#N/A	#N/A	0.0260729	1
ALDH2	5280442	ALDH2	COc1ccc(cc1)c1cc(=O)c2c(o1)cc(cc2O)O	UNPD15363	DANYIYRPLHHOCZ-UHFFFAOYSA-N	#N/A	#N/A	0.00661351	1
MAPT	5317284	MAPT	COc1c(O)cc2c(c1O)c(=O)cc(o2)c1ccc(c(c1)O)O	UNPD38995	FHHSEFRSDKWJKJ-UHFFFAOYSA-N	#N/A	#N/A	0.0106182	1
ALOX15	5379540	ALOX15	O=Cc1c(O)cc(c2c1Oc1c(OC2=O)c(C)c(c2c1C(O)OC2=O)O)C	UNPD173677	IEVVSJFLBYOUCJ-UHFFFAOYSA-N	#N/A	#N/A	0.0107788	1
HSD17B10	5781144	HSD17B10	Oc1cc(cc(c1O)O)c1coc2c(c1=O)c(O)c(c(c2)O)O	UNPD96378	DFURNQJNFBMYHM-UHFFFAOYSA-N	#N/A	#N/A	0.0114425	1
HTR1D	6917970	HTR1D	COc1cc2CCN3[C@H](c2cc1O)Cc1c(C3)c(OC)c(cc1)O	ATCMD20251	JKPISQIIWUONPB-HNNXBMFYSA-N	#N/A	#N/A	0.00853169	1
CDK2	10017019	CDK2	Brc1ccc2c(c1)c(c[nH]2)c1ccnc(n1)N	UNPD101596	PKQJCYXKRNGUKQ-UHFFFAOYSA-N	#N/A	#N/A	0.0134833	1
MMP2	10089677	MMP2	Nc1nc2c([nH]1)ccnc2c1[nH]c(c(c1)Br)Br	UNPD4734	QAKGJAQGTQLMFN-UHFFFAOYSA-N	#N/A	#N/A	0.0251615	1
HTR6	10404564	HTR6	Brc1ccc2c(c1)[nH]cc2/C=C\1/N(C)C(=N)N(C1=O)C	UNPD86138	OVVZEMAUZWSOHR-ZSUDRMHPSA-N	#N/A	#N/A	0.0112489	1
L3MBTL1	10414856	L3MBTL1	Oc1ccc(cc1)c1cc(=O)c2c(o1)c(c(cc2O)O)c1c(oc2c(c1=O)c(O)cc(c2)O)c1ccc(cc1)O	UNPD90635	IQAMTZLKUHMPPE-UHFFFAOYSA-N	#N/A	#N/A	0.00977428	1
APAF1	11425923	APAF1	C[C@H]1COC2=C1C(=O)C(=O)c1c2ccc2c1cccc2C	ATCMD5710	HARGZZNYNSYSGJ-JTQLQIEISA-N	#N/A	#N/A	0.0192398	1
CDK5R1	45359496	CDK5R1	CC1C/C=C/C(O)C(O)CC/C=C/c2c(C(=O)O1)c(O)cc(c2)O	UNPD11761	NHAQNKDEUQPSIX-JHMJBTLWSA-N	#N/A	#N/A	0.0132122	1
MAPT	54685921	MAPT	Oc1cc(/C=C/c2ccc(c(c2)O)O)oc(=O)c1	UNPD39949	SGJNQVTUYXCBKH-HNQUOIGGSA-N	#N/A	#N/A	0.00893108	1
KIT	71665427	KIT	NC(=O)C1=C(N)C(=O)C=C(C1=O)Nc1ccccc1O	UNPD225503	PAYLFJFRBIHGBV-UHFFFAOYSA-N	#N/A	#N/A	0.0242001	1
CA1	273	CA1	NCCCCCN	UNPD182359	VHRGRCVQAFMJIZ-UHFFFAOYSA-N	DB03854	experimental	0.0407369	1
CA5A	289	CA5A	Oc1ccccc1O	UNPD186427	YCIMNLLNPGFGHC-UHFFFAOYSA-N	DB02232	experimental	0.0151775	1
APEX1	471	APEX1	Oc1cc2OC(c3ccc(c(c3)O)O)C(C(=O)c2c(c1)O)O	UNPD155042	CXQWRCVTCMQVQX-UHFFFAOYSA-N	#N/A	#N/A	0.0076329	1
CA12	1057	CA12	Oc1c(O)cccc1O	UNPD65716	WQGWDDDVZFFDIG-UHFFFAOYSA-N	#N/A	#N/A	0.0166768	1
HTR6	2769	HTR6	COC1CN(CCCOc2ccc(cc2)F)CCC1NC(=O)c1cc(Cl)c(cc1OC)N	UNPD89539	DCSUBABJRXZOMT-UHFFFAOYSA-N	#N/A	#N/A	0.013995	1
ALOX15	3611	ALOX15	CC(c1cccc(=O)c(c1)O)C	UNPD48339	FUWUEFKEXZQKKA-UHFFFAOYSA-N	#N/A	#N/A	0.00642163	1
THPO	5870	THPO	Oc1ccc2c(c1)CC[C@@H]1[C@@H]2CC[C@]2([C@H]1CCC2=O)C	ATCMD7369	DNXHEGUUPJUMQT-CBZIJGRNSA-N	DB00655	approved	0.00582137	1
CA2	6047	CA2	OC(=O)[C@H](Cc1ccc(c(c1)O)O)N	TCMSP413	WTDRDQBEARUVNC-LURJTMIESA-N	DB01235	approved	0.0224676	1
DAO	6128	DAO	O=C1CC[C@]2(C(=C1)CC[C@@H]1[C@@H]2CC[C@]2([C@H]1CCC2=O)C)C	ATCMD1166	AEMFNILZOJDQLW-QAGGRKNESA-N	DB01536	experimental; illicit	0.0121953	1
HTR6	8223	HTR6	O=C([C@H]1CN(C)[C@H]2C(=C1)c1cccc3c1c(C2)c[nH]3)N[C@]1(C)O[C@@]2(N(C1=O)[C@@H](Cc1ccccc1)C(=O)N1[C@H]2CCC1)O	ATCMD7234	XCGSFFUVFURLIX-VFGNJEKYSA-N	DB00696	approved	0.0175351	1
RBBP9	10607	RBBP9	COc1cc(cc(c1OC)OC)[C@H]1[C@H]2C(=O)OC[C@@H]2[C@H](c2c1cc1OCOc1c2)O	ATCMD17534	YJGVMLPVUAXIQN-XVVDYKMHSA-N	#N/A	#N/A	0.0147407	1
CA2	10748	CA2	COc1ccc2c(c1)oc(=O)cc2	UNPD41980	LIIALPBMIOVAHH-UHFFFAOYSA-N	#N/A	#N/A	0.0434832	1
CA1	16402	CA1	NCCCCCCN	UNPD188654	NAQMVNRVTILPCV-UHFFFAOYSA-N	DB03260	experimental	0.0407292	1
POLB	53277	POLB	CC1Oc2cc3c(c(c2C(=O)C1C)O)c(O)cc(c3c1c(O)cc(c2c1cc1OC(C)C(C(=O)c1c2O)C)O)O	UNPD111785	RHNVLFNWDGWACV-UHFFFAOYSA-N	#N/A	#N/A	0.00999824	1
ADORA2B	60961	ADORA2B	OC[C@H]1O[C@H]([C@@H]([C@@H]1O)O)n1cnc2c1ncnc2N	ATCMD617	OIRDTQYFTABQOQ-KQYNXXCUSA-N	DB00640	approved; investigational	0.0219592	1
VDR	65999	VDR	CCCc1nc2c(n1Cc1ccc(cc1)c1ccccc1C(=O)O)cc(cc2C)c1nc2c(n1C)cccc2	UNPD94012	RMMXLENWKUUMAY-UHFFFAOYSA-N	DB00966	approved; investigational	0.00853276	1
CA6	71567	CA6	N[C@@H](C(=O)O)Cc1ccccc1	TCMSP41	COLNVLDHVKWLRT-MRVPVSSYSA-N	DB02556	experimental	0.0229208	1
CA4	445858	CA4	COc1cc(/C=C/C(=O)O)ccc1O	UNPD12047	KSEBMYQBYZTDHS-HWKANZROSA-N	DB07767	experimental	0.029184	1
ALOX15	969516	ALOX15	COc1cc(/C=C/C(=O)CC(=O)/C=C/c2ccc(c(c2)OC)O)ccc1O	UNPD3183	VFLDPWHFBUODDF-FCXRPNKRSA-N	#N/A	#N/A	0.00860375	1
MAPT	1548910	MAPT	Oc1ccc(cc1)/C=C\c1cc(O)cc(c1)O	UNPD63618	LUKBXSAWLPMMSZ-UPHRSURJSA-N	#N/A	#N/A	0.00865377	1
ADRA1B	1548968	ADRA1B	CNCC[C@@H](c1ccccc1)Oc1ccc(cc1)C(F)(F)F	TCMTW23956	RTHCYVBBDHJXIQ-INIZCTEOSA-N	#N/A	#N/A	0.0168216	1
ACP1	2724385	ACP1	O=C1OCC(=C1)C1CC[C@]2([C@]1(C)[C@H](O)C[C@H]1[C@H]2CC[C@H]2[C@]1(C)CC[C@@H](C2)O[C@H]1C[C@H](O)[C@@H]([C@H](O1)C)O[C@H]1C[C@H](O)[C@@H]([C@H](O1)C)O[C@H]1C[C@H](O)[C@@H]([C@H](O1)C)O)O	ATCMD5522	LTMHDMANZUZIPE-PUGKRICDSA-N	DB00390	approved	0.010849	1
MAPT	5152866	MAPT	Oc1cc2OC(C(Cc2c(c1)O)OC(=O)c1cc(O)c(c(c1)O)O)c1cc(O)c(c(c1c1c(cc(c(c1O)O)O)C1Oc2cc(O)cc(c2CC1O)O)O)O	UNPD32945	CTVAVEOYQKVFFY-UHFFFAOYSA-N	#N/A	#N/A	0.0100835	1
ALOX15	5280754	ALOX15	C/C=C/CC(C(C1C(=O)NC(CC)C(=O)N(C)CC(=O)N(C)C(CC(C)C)C(=O)NC(C(C)C)C(=O)N(C)C(CC(C)C)C(=O)NC(C(=O)NC(C(=O)N(C(C(=O)N(C(C(=O)N(C(C(=O)N1C)C(C)C)C)CC(C)C)C)CC(C)C)C)C)C)O)C	UNPD132024	PMATZTZNYRCHOR-IMVLJIQESA-N	DB00091	approved; investigational; vet_approved	0.00822207	1
MAPT	5281847	MAPT	O=C(c1c(O)c(Cc2c(O)c(C)c(c(c2O)C(=O)C)O)c(c2c1OC(C)(C)C=C2)O)/C=C/c1ccccc1	UNPD192174	DEZFNHCVIZBHBI-ZHACJKMWSA-N	#N/A	#N/A	0.00687001	1
CDK4	9833337	CDK4	O/N=C/1\Cc2cc(Br)c(c(c2)Br)Oc2cc(C/C(=N\O)/C(=O)NCCc3cc(c(Oc4cc(CCNC1=O)cc(Br)c4O)c(Br)c3)Br)cc(c2O)Br	UNPD67448	WSOCBHDTRCSWRH-PJUICVFASA-N	#N/A	#N/A	0.0164811	1
F11	12303949	F11	O[C@@H]1[C@H]2COC(=O)c3cc(O)c(c(c3c3c(C(=O)O[C@H]1[C@H]([C@@H](O2)OC(=O)c1cc(O)c(c(c1)O)O)O)cc(O)c(c3O)O)O)O	ATCMD4045	TUSDEZXZIZRFGC-ORQNFNANSA-N	#N/A	#N/A	0.0125732	1
ITGA4	14286542	ITGA4	CC(CC1NC(=O)C23C1C(C)C(=CC3C=C(C)CCC(C(C=CC2=O)O)O)C)C	UNPD115130	GCIKKGSNXSCKCP-HUKVCQRGSA-N	#N/A	#N/A	0.0100839	1
HSD17B10	25202646	HSD17B10	OC(=O)C(Cc1ccc(c(c1)O)O)(N)C	CNPD6010	CJCSPKMFHVPWAR-UHFFFAOYSA-N	#N/A	#N/A	0.00980429	1
CA12	1102	CA12	NCCCNCCCCN	UNPD179137	ATHGHQPFGPMSJY-UHFFFAOYSA-N	DB03566	experimental	0.0389815	1
HPGD	1287	HPGD	Oc1cc(O)c2c(c1)OC(C(C2)OC(=O)c1cc(O)c(c(c1)O)O)c1cc(O)c(c(c1)O)O	UNPD126158	WMBWREPUVVBILR-UHFFFAOYSA-N	#N/A	#N/A	0.00812647	1
SIRT3	2399	SIRT3	O=C1NC(=O)C(=C1c1c[nH]c2c1cccc2)c1c[nH]c2c1cccc2	UNPD70436	DQYBRTASHMYDJG-UHFFFAOYSA-N	#N/A	#N/A	0.0293778	1
HSD17B10	3442	HSD17B10	CCCCc1ccc(nc1)C(=O)O	UNPD61248	DGMPVYSXXIOGJY-UHFFFAOYSA-N	#N/A	#N/A	0.0107137	1
HTR1B	5095	HTR1B	CCCN(CCC)CCc1cccc2c1CC(=O)N2	UNPD113136	UHSKFQJFRQCDBE-UHFFFAOYSA-N	DB00268	approved; investigational	0.0113049	1
ADRA1B	5709	ADRA1B	Cc1cc(cc(c1CC1=NCCN1)C)C(C)(C)C	UNPD177430	HUCJFAOMUPXHDK-UHFFFAOYSA-N	DB06694	approved	0.0179826	1
DRD4	5770	DRD4	COc1ccc2c(c1)[nH]c1c2CCN2[C@@H]1C[C@H]1[C@@H](C2)C[C@H]([C@@H]([C@H]1C(=O)OC)OC)OC(=O)c1cc(OC)c(c(c1)OC)OC	ATCMD18573	QEVHRUUCFGRFIF-MDEJGZGSSA-N	DB00206	approved	0.00953391	1
PTPN6	10114	PTPN6	O=C1C=C2[C@@H]3C[C@](C)(CC[C@]3(C)CC[C@]2([C@]2([C@H]1[C@@]1(C)CC[C@@H](C([C@@H]1CC2)(C)C)O)C)C)C(=O)O	ATCMD8821	MPDGHEJMBKOTSU-YKLVYJNSSA-N	#N/A	#N/A	0.0156777	1
CA4	10742	CA4	COc1cc(cc(c1O)OC)C(=O)O	UNPD17684	JMSVCTWVEWCHDZ-UHFFFAOYSA-N	#N/A	#N/A	0.0309778	1
XDH	96506	XDH	Oc1ccc(cc1)c1cc(=O)c2c(o1)c(O)c(c(c2O)O)O	UNPD32949	SPZXXUUDYMHBSG-UHFFFAOYSA-N	#N/A	#N/A	0.0120333	1
POLB	160115	POLB	CC1CC(=O)c2c(O1)cc1c(c2O)c(O)cc(c1c1c(O)cc(c2c1cc1OC(C)CC(=O)c1c2O)O)O	UNPD136045	JGQBYBXYRUCBQY-UHFFFAOYSA-N	#N/A	#N/A	0.00609828	1
APEX1	271296	APEX1	CC1=CC(=O)c2c(C1=O)c(O)ccc2O	UNPD73694	YKPXIWHBRBFRQM-UHFFFAOYSA-N	#N/A	#N/A	0.0073049	1
FABP2	445639	FABP2	CCCCCCCC/C=C\CCCCCCCC(=O)O	UNPD48939	ZQPPMHVWECSIRJ-KTKRTIGZSA-N	#N/A	#N/A	0.0203383	1
APEX1	3080568	APEX1	COc1cc(O)cc(c1Oc1cc(C)cc(c1C(=O)O)O)C(=O)OC	UNPD134862	XOKVHFNTYHPEHN-UHFFFAOYSA-N	#N/A	#N/A	0.015904	1
ADRA1B	4866774	ADRA1B	CNCC(c1ccc(c(c1)O)O)O	UNPD107202	UCTWMZQNUQWSLP-UHFFFAOYSA-N	#N/A	#N/A	0.02466	1
GABRA3	5281600	GABRA3	Oc1ccc(cc1)c1cc(=O)c2c(o1)c(c(cc2O)O)c1cc(ccc1O)c1cc(=O)c2c(o1)cc(cc2O)O	UNPD70123	YUSWMAULDXZHPY-UHFFFAOYSA-N	#N/A	#N/A	0.0213931	1
CA12	6971009	CA12	N[C@H](C(=O)O)Cc1c[nH]cn1	ATCMD9542	HNDVDQJCIGZPNO-YFKPBYRVSA-N	DB00117	approved; nutraceutical	0.0389213	1
PTK2	10423452	PTK2	Oc1cc(O)c2c(c1)oc1c(c2=O)c(C)c(c(c1)O)O	UNPD13869	YPBXGIBBOZOVPM-UHFFFAOYSA-N	#N/A	#N/A	0.0246795	1
CA5A	72	CA5A	OC(=O)c1ccc(c(c1)O)O	UNPD60430	YQUVCSBJEUQKSH-UHFFFAOYSA-N	DB03946	experimental	0.0199093	1
CA13	135	CA13	Oc1ccc(cc1)C(=O)O	UNPD28717	FJKROLUGYXJWQN-UHFFFAOYSA-N	DB04242	experimental	0.0157543	1
CA9	785	CA9	Oc1ccc(cc1)O	UNPD192913	QIGBRXMKCJKVMJ-UHFFFAOYSA-N	DB09526	approved	0.012251	1
SLC6A2	951	SLC6A2	NCC(c1ccc(c(c1)O)O)O	UNPD165365	SFLSHLFXELFNJZ-UHFFFAOYSA-N	#N/A	#N/A	0.0193717	1
HTR4	1832	HTR4	COc1ccc2c(c1)c(CCN(C)C)c[nH]2	UNPD21953	ZSTKHSQDNIGFLM-UHFFFAOYSA-N	#N/A	#N/A	0.0110533	1
ADRBK2	2290	ADRBK2	Oc1ccc(cc1)C(=O)NC1CNCCCC1OC(=O)c1cc(O)c(c(c1)O)C(=O)c1c(O)cccc1C(=O)O	UNPD58927	XYUFCXJZFZPEJD-UHFFFAOYSA-N	#N/A	#N/A	0.014955	1
GABRG2	4266	GABRG2	NCc1cc(no1)O	UNPD5005	ZJQHPWUVQPJPQT-UHFFFAOYSA-N	#N/A	#N/A	0.02688	1
GRM2	10255	GRM2	OC(=O)C[C@H]1[C@H](CN[C@@H]1C(=O)O)C(=C)C	ATCMD934	VLSMHEGGTFMBBZ-OOZYFLPDSA-N	#N/A	#N/A	0.0213278	1
POLB	10603	POLB	Oc1cc2CC3(C(c2cc1O)c1ccc(c(c1OC3)O)O)O	UNPD110152	WZUVPPKBWHMQCE-UHFFFAOYSA-N	#N/A	#N/A	0.00809768	1
CA7	10680	CA7	O=c1cc(oc2c1cccc2)c1ccccc1	UNPD33417	VHBFFQKBGNRLFZ-UHFFFAOYSA-N	DB07776	experimental	0.0153464	1
STAT3	64945	STAT3	C[C@@H]1CC[C@]2([C@@H]([C@H]1C)C1=CC[C@H]3[C@@]([C@@]1(CC2)C)(C)CC[C@@H]1[C@]3(C)CC[C@@H](C1(C)C)O)C(=O)O	ATCMD22188	WCGUUGGRBIKTOS-GPOJBZKASA-N	#N/A	#N/A	0.00960192	1
FGFR3	72512	FGFR3	COc1ccc2c(c1)c1c(C)c3cnccc3c(c1[nH]2)C	UNPD154666	BKRMCDAOAQWNTG-UHFFFAOYSA-N	#N/A	#N/A	0.0132879	1
EED	164676	EED	O=C1c2c3CCCC(c3ccc2c2c(C1=O)c(C)co2)(C)C	UNPD104932	HYXITZLLTYIPOF-UHFFFAOYSA-N	#N/A	#N/A	0.0106028	1
ESRRG	2733526	ESRRG	CC/C(=C(\c1ccccc1)/c1ccc(cc1)OCCN(C)C)/c1ccccc1	UNPD209836	NKANXQFJJICGDU-QPLCGJKRSA-N	DB00675	approved	0.00440708	1
HPGD	3589471	HPGD	Oc1cc2OC(C(Cc2c(c1)O)OC(=O)c1cc(O)c(c(c1)O)O)c1cc(O)c(=O)c2c(c1)c(cc(c2O)O)C1Oc2cc(O)cc(c2CC1OC(=O)c1cc(O)c(c(c1)O)O)O	UNPD20525	ZEASWHWETFMWCV-UHFFFAOYSA-N	#N/A	#N/A	0.00795176	1
FABP5	5280450	FABP5	CCCCC/C=C\C/C=C\CCCCCCCC(=O)O	UNPD115691	OYHQOLUKZRVURQ-HZJYTTRNSA-N	#N/A	#N/A	0.0134843	1
PPARD	5280934	PPARD	CC/C=C\C/C=C\C/C=C\CCCCCCCC(=O)O	UNPD61555	DTOSIQBPPRVQHS-PDBXOOCHSA-N	DB00132	approved; nutraceutical	0.0153569	1
KDM4E	44338648	KDM4E	OC(=O)C(Cc1cc(O)c(cc1O)O)N	UNPD50736	YLKRUSPZOTYMAT-UHFFFAOYSA-N	#N/A	#N/A	0.00921242	1
CA13	323	CA13	O=c1ccc2c(o1)cccc2	UNPD21132	ZYGHJZDHTFUPRJ-UHFFFAOYSA-N	DB04665	experimental	0.0134711	1
HTR3E	1150	HTR3E	NCCc1c[nH]c2c1cccc2	UNPD94125	APJYDQYYACXCRM-UHFFFAOYSA-N	DB08653	experimental	0.00942399	1
HTR3E	1833	HTR3E	NCCc1c[nH]c2c1cc(OC)cc2	UNPD99281	JTEJPPKMYBDEMY-UHFFFAOYSA-N	#N/A	#N/A	0.0112429	1
PRKCA	3815	PRKCA	O=C1NCc2c1c1c([nH]c3c1cccc3)c1c2c2ccccc2[nH]1	UNPD143955	MEXUTNIFSHFQRG-UHFFFAOYSA-N	DB08036	experimental	0.00926215	1
CA2	6038	CA2	O=c1ccc2c([nH]1)cccc2	UNPD87681	LISFMEBWQUVKPJ-UHFFFAOYSA-N	DB04745	experimental	0.0385546	1
LMNA	23205	LMNA	C=C1C(=O)O[C@H]2[C@@H]1[C@H](O)[C@]1(C)C(=O)C=C[C@H]1[C@@H](C2)C	ATCMD9262	ZVLOPMNVFLSSAA-XEPQRQSNSA-N	#N/A	#N/A	0.00538385	1
MCL1	107905	MCL1	Oc1cc(O)c2c(c1)O[C@@H]([C@@H](C2)OC(=O)c1cc(O)c(c(c1)O)O)c1ccc(c(c1)O)O	ATCMD6847	LSHVYAFMTMFKBA-TZIWHRDSSA-N	#N/A	#N/A	0.00858004	1
PDGFRA	442514	PDGFRA	Oc1cc2C[C@@]3([C@H](c2cc1O)c1ccc(c(c1OC3)O)O)O	TCMTW24259	WZUVPPKBWHMQCE-XJKSGUPXSA-N	#N/A	#N/A	0.0147921	1
FABP5	444899	FABP5	CCCCC/C=C\C/C=C\C/C=C\C/C=C\CCCC(=O)O	UNPD128376	YZXBAPSDXZZRGB-DOFZRALJSA-N	#N/A	#N/A	0.00899823	1
LIMK1	667639	LIMK1	Oc1cc(/C=C/c2ccc(c(c2)O)O)cc(c1)O	UNPD195128	CDRPUGZCRXZLFL-OWOJBTEDSA-N	DB08399	experimental	0.00870387	1
ALOX15	688670	ALOX15	COc1ccc(cc1)c1cc(=O)c2c(o1)ccc(c2)OC	UNPD40887	ANVFDWBCVDQNEZ-UHFFFAOYSA-N	#N/A	#N/A	0.00637499	1
CA9	6989908	CA9	OC(=O)[C@@H](Cc1ccc(c(c1)O)O)N	TCMTW21731	WTDRDQBEARUVNC-ZCFIWIBFSA-N	#N/A	#N/A	0.0202881	1
CDK5R1	10421236	CDK5R1	Nc1nccc(n1)c1c[nH]c2c1c(O)ccc2	UNPD190714	SZOKTSDFOPVLFD-UHFFFAOYSA-N	#N/A	#N/A	0.0138298	1
PLK1	76328313	PLK1	Oc1c(O)c2C(=O)OCc2c(c1O)C	UNPD151993	IREYRQPUBOQACQ-UHFFFAOYSA-N	#N/A	#N/A	0.0183066	1
MAPT	2545|5944	MAPT	O=C1OC(=O)C2(C1(C)C1CCC2O1)C	HIT093|UNPD78044	DHZBEENLJMYSHQ-UHFFFAOYSA-N|DHZBEENLJMYSHQ-XCVPVQRUSA-N	#N/A	#N/A	0.00643086	1
CA2	774	CA2	NCCc1c[nH]cn1	UNPD123961	NTYJJOPFIAHURM-UHFFFAOYSA-N	#N/A	#N/A	0.0221605	1
TP53	3220	TP53	Cc1cc(O)c2c(c1)C(=O)c1c(C2=O)c(O)cc(c1)O	UNPD115803	RHMXXJGYXNZAPX-UHFFFAOYSA-N	DB07715	experimental	0.00543556	1
[truncated: 15,224 more rows]

## Sheet: 2408 Exp&ComNet_DB
DrugBank ID	DrugName	Pubchem_CID	Gene_name	Pubchem_CID	Canonical SMILES (Desalted)	InChI Key	Drug Group	Score	Rank	Type	Keep or give up
DB02232	1,2-Dihydroxybenzene	289	MAPT	289	Oc1ccccc1O	YCIMNLLNPGFGHC-UHFFFAOYSA-N	experimental	0.0123256	Known	Homo sapiens	aging
DB02232	1,2-Dihydroxybenzene	289	MTOR	289	Oc1ccccc1O	YCIMNLLNPGFGHC-UHFFFAOYSA-N	experimental	0.0118265	Known	Homo sapiens	aging
DB02232	1,2-Dihydroxybenzene	289	NFKB1	289	Oc1ccccc1O	YCIMNLLNPGFGHC-UHFFFAOYSA-N	experimental	0.0159985	Known	Homo sapiens	aging
DB02232	1,2-Dihydroxybenzene	289	CA5A	289	Oc1ccccc1O	YCIMNLLNPGFGHC-UHFFFAOYSA-N	experimental	0.0151775	1	#N/A	aging
DB02232	1,2-Dihydroxybenzene	289	CA1	289	Oc1ccccc1O	YCIMNLLNPGFGHC-UHFFFAOYSA-N	experimental	0.0148638	2	#N/A	aging
DB02232	1,2-Dihydroxybenzene	289	CA9	289	Oc1ccccc1O	YCIMNLLNPGFGHC-UHFFFAOYSA-N	experimental	0.0144906	3	#N/A	aging
DB02232	1,2-Dihydroxybenzene	289	CA7	289	Oc1ccccc1O	YCIMNLLNPGFGHC-UHFFFAOYSA-N	experimental	0.0125618	4	#N/A	aging
DB02232	1,2-Dihydroxybenzene	289	CA14	289	Oc1ccccc1O	YCIMNLLNPGFGHC-UHFFFAOYSA-N	experimental	0.0113985	5	#N/A	aging
DB02232	1,2-Dihydroxybenzene	289	CA12	289	Oc1ccccc1O	YCIMNLLNPGFGHC-UHFFFAOYSA-N	experimental	0.0183106	Known	#N/A	aging
DB02232	1,2-Dihydroxybenzene	289	CA2	289	Oc1ccccc1O	YCIMNLLNPGFGHC-UHFFFAOYSA-N	experimental	0.0201238	Known	#N/A	aging
DB02232	1,2-Dihydroxybenzene	289	CA5B	289	Oc1ccccc1O	YCIMNLLNPGFGHC-UHFFFAOYSA-N	experimental	0.0179537	Known	#N/A	aging
DB02232	1,2-Dihydroxybenzene	289	HSD17B10	289	Oc1ccccc1O	YCIMNLLNPGFGHC-UHFFFAOYSA-N	experimental	0.0145252	Known	#N/A	aging
DB02232	1,2-Dihydroxybenzene	289	THPO	289	Oc1ccccc1O	YCIMNLLNPGFGHC-UHFFFAOYSA-N	experimental	0.0151857	Known	#N/A	aging
DB01726	2-Aminophenol	5801	LMNA	5801	Nc1ccccc1O	CDAWCLOXVUBKRW-UHFFFAOYSA-N	experimental	0.0106002	1	Homo sapiens	aging
DB01726	2-Aminophenol	5801	TP53	5801	Nc1ccccc1O	CDAWCLOXVUBKRW-UHFFFAOYSA-N	experimental	0.00800888	2	Homo sapiens	aging
DB01726	2-Aminophenol	5801	NFKB1	5801	Nc1ccccc1O	CDAWCLOXVUBKRW-UHFFFAOYSA-N	experimental	0.00534251	5	Homo sapiens	aging
DB01726	2-Aminophenol	5801	LTA4H	5801	Nc1ccccc1O	CDAWCLOXVUBKRW-UHFFFAOYSA-N	experimental	0.00677526	3	#N/A	aging
DB01726	2-Aminophenol	5801	TBXAS1	5801	Nc1ccccc1O	CDAWCLOXVUBKRW-UHFFFAOYSA-N	experimental	0.00585886	4	#N/A	aging
DB01726	2-Aminophenol	5801	TSHR	5801	Nc1ccccc1O	CDAWCLOXVUBKRW-UHFFFAOYSA-N	experimental	0.119921	Known	#N/A	aging
DB03374	3,5-Diiodotyrosine	7058163	LMNA	7058163	OC(=O)[C@H](Cc1cc(I)c(c(c1)I)O)N	NYPYHUZRZVSYKL-ZETCQYMHSA-N	experimental	0.000612833	2	Homo sapiens	aging
DB03374	3,5-Diiodotyrosine	7058163	PCNA	7058163	OC(=O)[C@H](Cc1cc(I)c(c(c1)I)O)N	NYPYHUZRZVSYKL-ZETCQYMHSA-N	experimental	0.000409692	5	Homo sapiens	aging
DB03374	3,5-Diiodotyrosine	7058163	THRA	7058163	OC(=O)[C@H](Cc1cc(I)c(c(c1)I)O)N	NYPYHUZRZVSYKL-ZETCQYMHSA-N	experimental	0.000863343	1	#N/A	aging
DB03374	3,5-Diiodotyrosine	7058163	NR1H4	7058163	OC(=O)[C@H](Cc1cc(I)c(c(c1)I)O)N	NYPYHUZRZVSYKL-ZETCQYMHSA-N	experimental	0.000503753	3	#N/A	aging
DB03374	3,5-Diiodotyrosine	7058163	THRB	7058163	OC(=O)[C@H](Cc1cc(I)c(c(c1)I)O)N	NYPYHUZRZVSYKL-ZETCQYMHSA-N	experimental	0.000469231	4	#N/A	aging
DB03374	3,5-Diiodotyrosine	7058163	RGS12	7058163	OC(=O)[C@H](Cc1cc(I)c(c(c1)I)O)N	NYPYHUZRZVSYKL-ZETCQYMHSA-N	experimental	0.378322	Known	#N/A	aging
DB01957	3-Chlorophenol	7933	LMNA	7933	Oc1cccc(c1)Cl	HORNXRXVQWOLPJ-UHFFFAOYSA-N	experimental	0.0107051	1	Homo sapiens	aging
DB01957	3-Chlorophenol	7933	TP53	7933	Oc1cccc(c1)Cl	HORNXRXVQWOLPJ-UHFFFAOYSA-N	experimental	0.00796345	2	Homo sapiens	aging
DB01957	3-Chlorophenol	7933	NFKB1	7933	Oc1cccc(c1)Cl	HORNXRXVQWOLPJ-UHFFFAOYSA-N	experimental	0.00540073	5	Homo sapiens	aging
DB01957	3-Chlorophenol	7933	LTA4H	7933	Oc1cccc(c1)Cl	HORNXRXVQWOLPJ-UHFFFAOYSA-N	experimental	0.00677526	3	#N/A	aging
DB01957	3-Chlorophenol	7933	TBXAS1	7933	Oc1cccc(c1)Cl	HORNXRXVQWOLPJ-UHFFFAOYSA-N	experimental	0.00585179	4	#N/A	aging
DB01957	3-Chlorophenol	7933	TSHR	7933	Oc1cccc(c1)Cl	HORNXRXVQWOLPJ-UHFFFAOYSA-N	experimental	0.120132	Known	#N/A	aging
DB02362	4-Aminobenzoic acid	978	LMNA	978	OC(=O)c1ccc(cc1)N	ALYNCZNDIQEVRV-UHFFFAOYSA-N	experimental	0.0108604	1	Homo sapiens	aging
DB02362	4-Aminobenzoic acid	978	TP53	978	OC(=O)c1ccc(cc1)N	ALYNCZNDIQEVRV-UHFFFAOYSA-N	experimental	0.00786916	2	Homo sapiens	aging
DB02362	4-Aminobenzoic acid	978	NFKB1	978	OC(=O)c1ccc(cc1)N	ALYNCZNDIQEVRV-UHFFFAOYSA-N	experimental	0.00532809	5	Homo sapiens	aging
DB02362	4-Aminobenzoic acid	978	LTA4H	978	OC(=O)c1ccc(cc1)N	ALYNCZNDIQEVRV-UHFFFAOYSA-N	experimental	0.00677213	3	#N/A	aging
DB02362	4-Aminobenzoic acid	978	TBXAS1	978	OC(=O)c1ccc(cc1)N	ALYNCZNDIQEVRV-UHFFFAOYSA-N	experimental	0.00586846	4	#N/A	aging
DB02362	4-Aminobenzoic acid	978	TSHR	978	OC(=O)c1ccc(cc1)N	ALYNCZNDIQEVRV-UHFFFAOYSA-N	experimental	0.118945	Known	#N/A	aging
DB01667	8-azaguanine	8646	MAPT	8646	Nc1nc2nn[nH]c2c(=O)[nH]1	LPXQRXLUHJKZIE-UHFFFAOYSA-N	experimental	0.00956556	2	Homo sapiens	aging
DB01667	8-azaguanine	8646	HIF1A	8646	Nc1nc2nn[nH]c2c(=O)[nH]1	LPXQRXLUHJKZIE-UHFFFAOYSA-N	experimental	0.0248327	Known	Homo sapiens	aging
DB01667	8-azaguanine	8646	TP53	8646	Nc1nc2nn[nH]c2c(=O)[nH]1	LPXQRXLUHJKZIE-UHFFFAOYSA-N	experimental	0.0347732	Known	Homo sapiens	aging
DB01667	8-azaguanine	8646	HPRT1	8646	Nc1nc2nn[nH]c2c(=O)[nH]1	LPXQRXLUHJKZIE-UHFFFAOYSA-N	experimental	0.0172944	1	#N/A	aging
DB01667	8-azaguanine	8646	ALDH1A1	8646	Nc1nc2nn[nH]c2c(=O)[nH]1	LPXQRXLUHJKZIE-UHFFFAOYSA-N	experimental	0.0091551	3	#N/A	aging
DB01667	8-azaguanine	8646	HSD17B10	8646	Nc1nc2nn[nH]c2c(=O)[nH]1	LPXQRXLUHJKZIE-UHFFFAOYSA-N	experimental	0.00770798	4	#N/A	aging
DB01667	8-azaguanine	8646	SMN1	8646	Nc1nc2nn[nH]c2c(=O)[nH]1	LPXQRXLUHJKZIE-UHFFFAOYSA-N	experimental	0.0067882	5	#N/A	aging
DB01667	8-azaguanine	8646	ALOX15	8646	Nc1nc2nn[nH]c2c(=O)[nH]1	LPXQRXLUHJKZIE-UHFFFAOYSA-N	experimental	0.0263641	Known	#N/A	aging
DB01667	8-azaguanine	8646	HBB	8646	Nc1nc2nn[nH]c2c(=O)[nH]1	LPXQRXLUHJKZIE-UHFFFAOYSA-N	experimental	0.0561813	Known	#N/A	aging
DB01667	8-azaguanine	8646	MITF	8646	Nc1nc2nn[nH]c2c(=O)[nH]1	LPXQRXLUHJKZIE-UHFFFAOYSA-N	experimental	0.0520812	Known	#N/A	aging
DB02736	Acetamide	178	MAPT	178	CC(=O)N	DLFVBJFMPXGRIB-UHFFFAOYSA-N	experimental	0.00850349	1	Homo sapiens	aging
DB02736	Acetamide	178	BLM	178	CC(=O)N	DLFVBJFMPXGRIB-UHFFFAOYSA-N	experimental	0.0275663	Known	Homo sapiens	aging
DB02736	Acetamide	178	LMNA	178	CC(=O)N	DLFVBJFMPXGRIB-UHFFFAOYSA-N	experimental	0.0259704	Known	Homo sapiens	aging
DB02736	Acetamide	178	HSD17B10	178	CC(=O)N	DLFVBJFMPXGRIB-UHFFFAOYSA-N	experimental	0.00811059	2	#N/A	aging
DB02736	Acetamide	178	THPO	178	CC(=O)N	DLFVBJFMPXGRIB-UHFFFAOYSA-N	experimental	0.00733963	3	#N/A	aging
DB02736	Acetamide	178	RECQL	178	CC(=O)N	DLFVBJFMPXGRIB-UHFFFAOYSA-N	experimental	0.00687774	4	#N/A	aging
DB02736	Acetamide	178	TSHR	178	CC(=O)N	DLFVBJFMPXGRIB-UHFFFAOYSA-N	experimental	0.00668817	5	#N/A	aging
DB02736	Acetamide	178	ALOX15	178	CC(=O)N	DLFVBJFMPXGRIB-UHFFFAOYSA-N	experimental	0.0261472	Known	#N/A	aging
DB02736	Acetamide	178	PMP22	178	CC(=O)N	DLFVBJFMPXGRIB-UHFFFAOYSA-N	experimental	0.0371929	Known	#N/A	aging
DB00945	Acetylsalicylic acid	2244	LMNA	2244	CC(=O)Oc1ccccc1C(=O)O	BSYNRYMUTXBXSQ-UHFFFAOYSA-N	approved; vet_approved	0.00586811	1	Homo sapiens	aging
DB00945	Acetylsalicylic acid	2244	BLM	2244	CC(=O)Oc1ccccc1C(=O)O	BSYNRYMUTXBXSQ-UHFFFAOYSA-N	approved; vet_approved	0.0217004	Known	Homo sapiens	aging
DB00945	Acetylsalicylic acid	2244	PTGS2	2244	CC(=O)Oc1ccccc1C(=O)O	BSYNRYMUTXBXSQ-UHFFFAOYSA-N	approved; vet_approved	0.0536635	Known	Homo sapiens	aging
DB00945	Acetylsalicylic acid	2244	ITGAV	2244	CC(=O)Oc1ccccc1C(=O)O	BSYNRYMUTXBXSQ-UHFFFAOYSA-N	approved; vet_approved	0.00565205	2	#N/A	aging
DB00945	Acetylsalicylic acid	2244	FASN	2244	CC(=O)Oc1ccccc1C(=O)O	BSYNRYMUTXBXSQ-UHFFFAOYSA-N	approved; vet_approved	0.0043809	3	#N/A	aging
DB00945	Acetylsalicylic acid	2244	ALOX5	2244	CC(=O)Oc1ccccc1C(=O)O	BSYNRYMUTXBXSQ-UHFFFAOYSA-N	approved; vet_approved	0.0040385	4	#N/A	aging
DB00945	Acetylsalicylic acid	2244	TUBB3	2244	CC(=O)Oc1ccccc1C(=O)O	BSYNRYMUTXBXSQ-UHFFFAOYSA-N	approved; vet_approved	0.00399993	5	#N/A	aging
DB00945	Acetylsalicylic acid	2244	ITGA2B	2244	CC(=O)Oc1ccccc1C(=O)O	BSYNRYMUTXBXSQ-UHFFFAOYSA-N	approved; vet_approved	0.0814215	Known	#N/A	aging
DB00945	Acetylsalicylic acid	2244	ITGB3	2244	CC(=O)Oc1ccccc1C(=O)O	BSYNRYMUTXBXSQ-UHFFFAOYSA-N	approved; vet_approved	0.0615703	Known	#N/A	aging
DB00945	Acetylsalicylic acid	2244	PTGS1	2244	CC(=O)Oc1ccccc1C(=O)O	BSYNRYMUTXBXSQ-UHFFFAOYSA-N	approved; vet_approved	0.0458734	Known	#N/A	aging
DB00945	Acetylsalicylic acid	2244	TSHR	2244	CC(=O)Oc1ccccc1C(=O)O	BSYNRYMUTXBXSQ-UHFFFAOYSA-N	approved; vet_approved	0.0274915	Known	#N/A	aging
DB00787	Aciclovir	2022	APEX1	2022	Nc1nc(=O)c2c([nH]1)n(COCCO)cn2	MKUXAQIIEYXACX-UHFFFAOYSA-N	approved	0.0104809	1	Homo sapiens	aging
DB00787	Aciclovir	2022	MAPT	2022	Nc1nc(=O)c2c([nH]1)n(COCCO)cn2	MKUXAQIIEYXACX-UHFFFAOYSA-N	approved	0.009104	3	Homo sapiens	aging
DB00787	Aciclovir	2022	BLM	2022	Nc1nc(=O)c2c([nH]1)n(COCCO)cn2	MKUXAQIIEYXACX-UHFFFAOYSA-N	approved	0.0288965	Known	Homo sapiens	aging
DB00787	Aciclovir	2022	LMNA	2022	Nc1nc(=O)c2c([nH]1)n(COCCO)cn2	MKUXAQIIEYXACX-UHFFFAOYSA-N	approved	0.0275004	Known	Homo sapiens	aging
DB00787	Aciclovir	2022	TDP1	2022	Nc1nc(=O)c2c([nH]1)n(COCCO)cn2	MKUXAQIIEYXACX-UHFFFAOYSA-N	approved	0.0100703	2	#N/A	aging
DB00787	Aciclovir	2022	HSD17B10	2022	Nc1nc(=O)c2c([nH]1)n(COCCO)cn2	MKUXAQIIEYXACX-UHFFFAOYSA-N	approved	0.00785784	4	#N/A	aging
DB00787	Aciclovir	2022	KDM4E	2022	Nc1nc(=O)c2c([nH]1)n(COCCO)cn2	MKUXAQIIEYXACX-UHFFFAOYSA-N	approved	0.00687737	5	#N/A	aging
DB00787	Aciclovir	2022	RECQL	2022	Nc1nc(=O)c2c([nH]1)n(COCCO)cn2	MKUXAQIIEYXACX-UHFFFAOYSA-N	approved	0.0272769	Known	#N/A	aging
DB00173	Adenine	190	BLM	190	Nc1ncnc2c1nc[nH]2	GFFGJBXGBJISGV-UHFFFAOYSA-N	approved; nutraceutical	0.00718144	2	Homo sapiens	aging
DB00173	Adenine	190	HTT	190	Nc1ncnc2c1nc[nH]2	GFFGJBXGBJISGV-UHFFFAOYSA-N	approved; nutraceutical	0.00622672	3	Homo sapiens	aging
DB00173	Adenine	190	LMNA	190	Nc1ncnc2c1nc[nH]2	GFFGJBXGBJISGV-UHFFFAOYSA-N	approved; nutraceutical	0.0604934	Known	Homo sapiens	aging
DB00173	Adenine	190	TSHR	190	Nc1ncnc2c1nc[nH]2	GFFGJBXGBJISGV-UHFFFAOYSA-N	approved; nutraceutical	0.0102582	1	#N/A	aging
DB00173	Adenine	190	ALDH1A1	190	Nc1ncnc2c1nc[nH]2	GFFGJBXGBJISGV-UHFFFAOYSA-N	approved; nutraceutical	0.00604015	4	#N/A	aging
DB00173	Adenine	190	HSD17B10	190	Nc1ncnc2c1nc[nH]2	GFFGJBXGBJISGV-UHFFFAOYSA-N	approved; nutraceutical	0.00556181	5	#N/A	aging
DB08838	Agmatine	199	RELA	199	NCCCCNC(=N)N	QYPPJABKJHAVHS-UHFFFAOYSA-N	experimental; investigational	0.0226811	1	Homo sapiens	aging
DB08838	Agmatine	199	HIF1A	199	NCCCCNC(=N)N	QYPPJABKJHAVHS-UHFFFAOYSA-N	experimental; investigational	0.00890401	5	Homo sapiens	aging
DB08838	Agmatine	199	NFKB1	199	NCCCCNC(=N)N	QYPPJABKJHAVHS-UHFFFAOYSA-N	experimental; investigational	0.0869826	Known	Homo sapiens	aging
DB08838	Agmatine	199	THPO	199	NCCCCNC(=N)N	QYPPJABKJHAVHS-UHFFFAOYSA-N	experimental; investigational	0.0143749	2	#N/A	aging
DB08838	Agmatine	199	TSHR	199	NCCCCNC(=N)N	QYPPJABKJHAVHS-UHFFFAOYSA-N	experimental; investigational	0.0110582	3	#N/A	aging
DB08838	Agmatine	199	HSD17B10	199	NCCCCNC(=N)N	QYPPJABKJHAVHS-UHFFFAOYSA-N	experimental; investigational	0.0107469	4	#N/A	aging
DB06728	Aniline	6115	LMNA	6115	Nc1ccccc1	PAYRUJLWNCNPSJ-UHFFFAOYSA-N	experimental	0.0109352	1	Homo sapiens	aging
DB06728	Aniline	6115	TP53	6115	Nc1ccccc1	PAYRUJLWNCNPSJ-UHFFFAOYSA-N	experimental	0.00801283	2	Homo sapiens	aging
DB06728	Aniline	6115	NFKB1	6115	Nc1ccccc1	PAYRUJLWNCNPSJ-UHFFFAOYSA-N	experimental	0.00540684	5	Homo sapiens	aging
DB06728	Aniline	6115	LTA4H	6115	Nc1ccccc1	PAYRUJLWNCNPSJ-UHFFFAOYSA-N	experimental	0.00692252	3	#N/A	aging
DB06728	Aniline	6115	TBXAS1	6115	Nc1ccccc1	PAYRUJLWNCNPSJ-UHFFFAOYSA-N	experimental	0.00587456	4	#N/A	aging
DB06728	Aniline	6115	TSHR	6115	Nc1ccccc1	PAYRUJLWNCNPSJ-UHFFFAOYSA-N	experimental	0.119332	Known	#N/A	aging
DB07352	Apigenin	5280443	PARP1	5280443	Oc1ccc(cc1)c1cc(=O)c2c(o1)cc(cc2O)O	KZNIFHPLKGYRTM-UHFFFAOYSA-N	experimental	0.00471942	1	Homo sapiens	aging
DB07352	Apigenin	5280443	LMNA	5280443	Oc1ccc(cc1)c1cc(=O)c2c(o1)cc(cc2O)O	KZNIFHPLKGYRTM-UHFFFAOYSA-N	experimental	0.0038871	4	Homo sapiens	aging
DB07352	Apigenin	5280443	AR	5280443	Oc1ccc(cc1)c1cc(=O)c2c(o1)cc(cc2O)O	KZNIFHPLKGYRTM-UHFFFAOYSA-N	experimental	0.00893383	Known	Homo sapiens	aging
DB07352	Apigenin	5280443	ESR1	5280443	Oc1ccc(cc1)c1cc(=O)c2c(o1)cc(cc2O)O	KZNIFHPLKGYRTM-UHFFFAOYSA-N	experimental	0.00802836	Known	Homo sapiens	aging
DB07352	Apigenin	5280443	GSK3B	5280443	Oc1ccc(cc1)c1cc(=O)c2c(o1)cc(cc2O)O	KZNIFHPLKGYRTM-UHFFFAOYSA-N	experimental	0.00552851	Known	Homo sapiens	aging
DB07352	Apigenin	5280443	HIF1A	5280443	Oc1ccc(cc1)c1cc(=O)c2c(o1)cc(cc2O)O	KZNIFHPLKGYRTM-UHFFFAOYSA-N	experimental	0.00604043	Known	Homo sapiens	aging
DB07352	Apigenin	5280443	MAPT	5280443	Oc1ccc(cc1)c1cc(=O)c2c(o1)cc(cc2O)O	KZNIFHPLKGYRTM-UHFFFAOYSA-N	experimental	0.00651974	Known	Homo sapiens	aging
DB07352	Apigenin	5280443	NR3C1	5280443	Oc1ccc(cc1)c1cc(=O)c2c(o1)cc(cc2O)O	KZNIFHPLKGYRTM-UHFFFAOYSA-N	experimental	0.00815441	Known	Homo sapiens	aging
DB07352	Apigenin	5280443	PTGS2	5280443	Oc1ccc(cc1)c1cc(=O)c2c(o1)cc(cc2O)O	KZNIFHPLKGYRTM-UHFFFAOYSA-N	experimental	0.00506788	Known	Homo sapiens	aging
DB07352	Apigenin	5280443	TP53	5280443	Oc1ccc(cc1)c1cc(=O)c2c(o1)cc(cc2O)O	KZNIFHPLKGYRTM-UHFFFAOYSA-N	experimental	0.00665602	Known	Homo sapiens	aging
DB07352	Apigenin	5280443	MAPK10	5280443	Oc1ccc(cc1)c1cc(=O)c2c(o1)cc(cc2O)O	KZNIFHPLKGYRTM-UHFFFAOYSA-N	experimental	0.00836152	Known	homologous analysis	aging
DB07352	Apigenin	5280443	PTP4A3	5280443	Oc1ccc(cc1)c1cc(=O)c2c(o1)cc(cc2O)O	KZNIFHPLKGYRTM-UHFFFAOYSA-N	experimental	0.00413454	2	#N/A	aging
DB07352	Apigenin	5280443	RAB9A	5280443	Oc1ccc(cc1)c1cc(=O)c2c(o1)cc(cc2O)O	KZNIFHPLKGYRTM-UHFFFAOYSA-N	experimental	0.00395752	3	#N/A	aging
DB07352	Apigenin	5280443	KDM4E	5280443	Oc1ccc(cc1)c1cc(=O)c2c(o1)cc(cc2O)O	KZNIFHPLKGYRTM-UHFFFAOYSA-N	experimental	0.00380328	5	#N/A	aging
DB07352	Apigenin	5280443	ABCB1	5280443	Oc1ccc(cc1)c1cc(=O)c2c(o1)cc(cc2O)O	KZNIFHPLKGYRTM-UHFFFAOYSA-N	experimental	0.00593054	Known	#N/A	aging
DB07352	Apigenin	5280443	ABCC1	5280443	Oc1ccc(cc1)c1cc(=O)c2c(o1)cc(cc2O)O	KZNIFHPLKGYRTM-UHFFFAOYSA-N	experimental	0.00750706	Known	#N/A	aging
DB07352	Apigenin	5280443	ABCG2	5280443	Oc1ccc(cc1)c1cc(=O)c2c(o1)cc(cc2O)O	KZNIFHPLKGYRTM-UHFFFAOYSA-N	experimental	0.00706941	Known	#N/A	aging
DB07352	Apigenin	5280443	ACHE	5280443	Oc1ccc(cc1)c1cc(=O)c2c(o1)cc(cc2O)O	KZNIFHPLKGYRTM-UHFFFAOYSA-N	experimental	0.00477633	Known	#N/A	aging
DB07352	Apigenin	5280443	ALDH1A1	5280443	Oc1ccc(cc1)c1cc(=O)c2c(o1)cc(cc2O)O	KZNIFHPLKGYRTM-UHFFFAOYSA-N	experimental	0.00632061	Known	#N/A	aging
DB07352	Apigenin	5280443	ALOX15	5280443	Oc1ccc(cc1)c1cc(=O)c2c(o1)cc(cc2O)O	KZNIFHPLKGYRTM-UHFFFAOYSA-N	experimental	0.00648471	Known	#N/A	aging
DB07352	Apigenin	5280443	CDK5	5280443	Oc1ccc(cc1)c1cc(=O)c2c(o1)cc(cc2O)O	KZNIFHPLKGYRTM-UHFFFAOYSA-N	experimental	0.00708338	Known	#N/A	aging
DB07352	Apigenin	5280443	CDK6	5280443	Oc1ccc(cc1)c1cc(=O)c2c(o1)cc(cc2O)O	KZNIFHPLKGYRTM-UHFFFAOYSA-N	experimental	0.0066272	Known	#N/A	aging
DB07352	Apigenin	5280443	CFTR	5280443	Oc1ccc(cc1)c1cc(=O)c2c(o1)cc(cc2O)O	KZNIFHPLKGYRTM-UHFFFAOYSA-N	experimental	0.00441359	Known	#N/A	aging
DB07352	Apigenin	5280443	CSNK2A1	5280443	Oc1ccc(cc1)c1cc(=O)c2c(o1)cc(cc2O)O	KZNIFHPLKGYRTM-UHFFFAOYSA-N	experimental	0.00425985	Known	#N/A	aging
DB07352	Apigenin	5280443	CSNK2B	5280443	Oc1ccc(cc1)c1cc(=O)c2c(o1)cc(cc2O)O	KZNIFHPLKGYRTM-UHFFFAOYSA-N	experimental	0.00604443	Known	#N/A	aging
DB07352	Apigenin	5280443	ESR2	5280443	Oc1ccc(cc1)c1cc(=O)c2c(o1)cc(cc2O)O	KZNIFHPLKGYRTM-UHFFFAOYSA-N	experimental	0.00810633	Known	#N/A	aging
DB07352	Apigenin	5280443	FLT3	5280443	Oc1ccc(cc1)c1cc(=O)c2c(o1)cc(cc2O)O	KZNIFHPLKGYRTM-UHFFFAOYSA-N	experimental	0.00523578	Known	#N/A	aging
DB07352	Apigenin	5280443	HPGD	5280443	Oc1ccc(cc1)c1cc(=O)c2c(o1)cc(cc2O)O	KZNIFHPLKGYRTM-UHFFFAOYSA-N	experimental	0.00683301	Known	#N/A	aging
DB07352	Apigenin	5280443	HSD17B1	5280443	Oc1ccc(cc1)c1cc(=O)c2c(o1)cc(cc2O)O	KZNIFHPLKGYRTM-UHFFFAOYSA-N	experimental	0.00597587	Known	#N/A	aging
DB07352	Apigenin	5280443	HSD17B10	5280443	Oc1ccc(cc1)c1cc(=O)c2c(o1)cc(cc2O)O	KZNIFHPLKGYRTM-UHFFFAOYSA-N	experimental	0.00651207	Known	#N/A	aging
DB07352	Apigenin	5280443	KARS	5280443	Oc1ccc(cc1)c1cc(=O)c2c(o1)cc(cc2O)O	KZNIFHPLKGYRTM-UHFFFAOYSA-N	experimental	0.00616772	Known	#N/A	aging
DB07352	Apigenin	5280443	KMT2A	5280443	Oc1ccc(cc1)c1cc(=O)c2c(o1)cc(cc2O)O	KZNIFHPLKGYRTM-UHFFFAOYSA-N	experimental	0.00500185	Known	#N/A	aging
DB07352	Apigenin	5280443	MAOA	5280443	Oc1ccc(cc1)c1cc(=O)c2c(o1)cc(cc2O)O	KZNIFHPLKGYRTM-UHFFFAOYSA-N	experimental	0.00858763	Known	#N/A	aging
DB07352	Apigenin	5280443	NOX4	5280443	Oc1ccc(cc1)c1cc(=O)c2c(o1)cc(cc2O)O	KZNIFHPLKGYRTM-UHFFFAOYSA-N	experimental	0.0087382	Known	#N/A	aging
DB07352	Apigenin	5280443	NPC1	5280443	Oc1ccc(cc1)c1cc(=O)c2c(o1)cc(cc2O)O	KZNIFHPLKGYRTM-UHFFFAOYSA-N	experimental	0.00526518	Known	#N/A	aging
DB07352	Apigenin	5280443	OPRD1	5280443	Oc1ccc(cc1)c1cc(=O)c2c(o1)cc(cc2O)O	KZNIFHPLKGYRTM-UHFFFAOYSA-N	experimental	0.00650513	Known	#N/A	aging
DB07352	Apigenin	5280443	OPRK1	5280443	Oc1ccc(cc1)c1cc(=O)c2c(o1)cc(cc2O)O	KZNIFHPLKGYRTM-UHFFFAOYSA-N	experimental	0.00660206	Known	#N/A	aging
DB07352	Apigenin	5280443	OPRM1	5280443	Oc1ccc(cc1)c1cc(=O)c2c(o1)cc(cc2O)O	KZNIFHPLKGYRTM-UHFFFAOYSA-N	experimental	0.00582297	Known	#N/A	aging
DB07352	Apigenin	5280443	PIM1	5280443	Oc1ccc(cc1)c1cc(=O)c2c(o1)cc(cc2O)O	KZNIFHPLKGYRTM-UHFFFAOYSA-N	experimental	0.00683539	Known	#N/A	aging
DB07352	Apigenin	5280443	PKM	5280443	Oc1ccc(cc1)c1cc(=O)c2c(o1)cc(cc2O)O	KZNIFHPLKGYRTM-UHFFFAOYSA-N	experimental	0.00484351	Known	#N/A	aging
DB07352	Apigenin	5280443	SYK	5280443	Oc1ccc(cc1)c1cc(=O)c2c(o1)cc(cc2O)O	KZNIFHPLKGYRTM-UHFFFAOYSA-N	experimental	0.00651175	Known	#N/A	aging
DB07352	Apigenin	5280443	TDP1	5280443	Oc1ccc(cc1)c1cc(=O)c2c(o1)cc(cc2O)O	KZNIFHPLKGYRTM-UHFFFAOYSA-N	experimental	0.00551521	Known	#N/A	aging
DB07352	Apigenin	5280443	THPO	5280443	Oc1ccc(cc1)c1cc(=O)c2c(o1)cc(cc2O)O	KZNIFHPLKGYRTM-UHFFFAOYSA-N	experimental	0.00448122	Known	#N/A	aging
DB07352	Apigenin	5280443	TNKS	5280443	Oc1ccc(cc1)c1cc(=O)c2c(o1)cc(cc2O)O	KZNIFHPLKGYRTM-UHFFFAOYSA-N	experimental	0.00992132	Known	#N/A	aging
DB07352	Apigenin	5280443	TNKS2	5280443	Oc1ccc(cc1)c1cc(=O)c2c(o1)cc(cc2O)O	KZNIFHPLKGYRTM-UHFFFAOYSA-N	experimental	0.00852227	Known	#N/A	aging
DB07352	Apigenin	5280443	TSHR	5280443	Oc1ccc(cc1)c1cc(=O)c2c(o1)cc(cc2O)O	KZNIFHPLKGYRTM-UHFFFAOYSA-N	experimental	0.00516794	Known	#N/A	aging
DB07352	Apigenin	5280443	USP2	5280443	Oc1ccc(cc1)c1cc(=O)c2c(o1)cc(cc2O)O	KZNIFHPLKGYRTM-UHFFFAOYSA-N	experimental	0.00367446	Known	#N/A	aging
DB07352	Apigenin	5280443	XDH	5280443	Oc1ccc(cc1)c1cc(=O)c2c(o1)cc(cc2O)O	KZNIFHPLKGYRTM-UHFFFAOYSA-N	experimental	0.00730589	Known	#N/A	aging
DB00548	Azelaic acid	2266	RELA	2266	OC(=O)CCCCCCCC(=O)O	BDJRBEYXGGNYIS-UHFFFAOYSA-N	approved	0.00787121	1	Homo sapiens	aging
DB00548	Azelaic acid	2266	HIF1A	2266	OC(=O)CCCCCCCC(=O)O	BDJRBEYXGGNYIS-UHFFFAOYSA-N	approved	0.00562197	5	Homo sapiens	aging
DB00548	Azelaic acid	2266	LMNA	2266	OC(=O)CCCCCCCC(=O)O	BDJRBEYXGGNYIS-UHFFFAOYSA-N	approved	0.0254687	Known	Homo sapiens	aging
DB00548	Azelaic acid	2266	NFKB1	2266	OC(=O)CCCCCCCC(=O)O	BDJRBEYXGGNYIS-UHFFFAOYSA-N	approved	0.0316425	Known	Homo sapiens	aging
DB00548	Azelaic acid	2266	THPO	2266	OC(=O)CCCCCCCC(=O)O	BDJRBEYXGGNYIS-UHFFFAOYSA-N	approved	0.00741071	2	#N/A	aging
DB00548	Azelaic acid	2266	HSD17B10	2266	OC(=O)CCCCCCCC(=O)O	BDJRBEYXGGNYIS-UHFFFAOYSA-N	approved	0.00643274	3	#N/A	aging
DB00548	Azelaic acid	2266	TSHR	2266	OC(=O)CCCCCCCC(=O)O	BDJRBEYXGGNYIS-UHFFFAOYSA-N	approved	0.0465315	Known	#N/A	aging
DB04368	Bb-3497	159596	LMNA	159596	CCCC[C@@H](C(=O)N[C@@H](C(C)(C)C)C(=O)N(C)C)CN(C=O)O	AVDLWYHBABSSHC-CHWSQXEVSA-N	experimental	0.000319126	1	Homo sapiens	aging
DB04368	Bb-3497	159596	CNR1	159596	CCCC[C@@H](C(=O)N[C@@H](C(C)(C)C)C(=O)N(C)C)CN(C=O)O	AVDLWYHBABSSHC-CHWSQXEVSA-N	experimental	0.000241749	5	Homo sapiens	aging
DB04368	Bb-3497	159596	HTR2C	159596	CCCC[C@@H](C(=O)N[C@@H](C(C)(C)C)C(=O)N(C)C)CN(C=O)O	AVDLWYHBABSSHC-CHWSQXEVSA-N	experimental	0.000302067	2	#N/A	aging
DB04368	Bb-3497	159596	TSHR	159596	CCCC[C@@H](C(=O)N[C@@H](C(C)(C)C)C(=O)N(C)C)CN(C=O)O	AVDLWYHBABSSHC-CHWSQXEVSA-N	experimental	0.000289662	3	#N/A	aging
DB04368	Bb-3497	159596	HTR2B	159596	CCCC[C@@H](C(=O)N[C@@H](C(C)(C)C)C(=O)N(C)C)CN(C=O)O	AVDLWYHBABSSHC-CHWSQXEVSA-N	experimental	0.000262673	4	#N/A	aging
DB04368	Bb-3497	159596	PDF	159596	CCCC[C@@H](C(=O)N[C@@H](C(C)(C)C)C(=O)N(C)C)CN(C=O)O	AVDLWYHBABSSHC-CHWSQXEVSA-N	experimental	0.214721	Known	#N/A	aging
DB01086	Benzocaine	2337	BLM	2337	CCOC(=O)c1ccc(cc1)N	BLFLLBZGZJTVJG-UHFFFAOYSA-N	approved	0.00708242	2	Homo sapiens	aging
DB01086	Benzocaine	2337	HTT	2337	CCOC(=O)c1ccc(cc1)N	BLFLLBZGZJTVJG-UHFFFAOYSA-N	approved	0.00611585	3	Homo sapiens	aging
DB01086	Benzocaine	2337	MAPT	2337	CCOC(=O)c1ccc(cc1)N	BLFLLBZGZJTVJG-UHFFFAOYSA-N	approved	0.00562363	5	Homo sapiens	aging
DB01086	Benzocaine	2337	LMNA	2337	CCOC(=O)c1ccc(cc1)N	BLFLLBZGZJTVJG-UHFFFAOYSA-N	approved	0.0595554	Known	Homo sapiens	aging
DB01086	Benzocaine	2337	TSHR	2337	CCOC(=O)c1ccc(cc1)N	BLFLLBZGZJTVJG-UHFFFAOYSA-N	approved	0.00999861	1	#N/A	aging
DB01086	Benzocaine	2337	ALDH1A1	2337	CCOC(=O)c1ccc(cc1)N	BLFLLBZGZJTVJG-UHFFFAOYSA-N	approved	0.00568015	4	#N/A	aging
DB03793	Benzoic acid	20144841	LMNA	20144841	OC(=O)c1ccccc1	WPYMKLBDIGXBTP-UHFFFAOYSA-N	approved	0.00568355	3	Homo sapiens	aging
DB03793	Benzoic acid	20144841	TP53	20144841	OC(=O)c1ccccc1	WPYMKLBDIGXBTP-UHFFFAOYSA-N	approved	0.00413995	4	Homo sapiens	aging
DB03793	Benzoic acid	20144841	MAPT	20144841	OC(=O)c1ccccc1	WPYMKLBDIGXBTP-UHFFFAOYSA-N	approved	0.00393564	5	Homo sapiens	aging
DB03793	Benzoic acid	20144841	TYR	20144841	OC(=O)c1ccccc1	WPYMKLBDIGXBTP-UHFFFAOYSA-N	approved	0.0291961	1	#N/A	aging
DB03793	Benzoic acid	20144841	SRD5A2	20144841	OC(=O)c1ccccc1	WPYMKLBDIGXBTP-UHFFFAOYSA-N	approved	0.0243966	2	#N/A	aging
DB03793	Benzoic acid	20144841	DAO	20144841	OC(=O)c1ccccc1	WPYMKLBDIGXBTP-UHFFFAOYSA-N	approved	0.251847	Known	#N/A	aging
DB03793	Benzoic acid	20144841	TSHR	20144841	OC(=O)c1ccccc1	WPYMKLBDIGXBTP-UHFFFAOYSA-N	approved	0.070095	Known	#N/A	aging
DB09096	Benzoyl peroxide	7187	BLM	7187	O=C(c1ccccc1)OOC(=O)c1ccccc1	OMPJBNCRMGITSC-UHFFFAOYSA-N	approved	0.00711007	2	Homo sapiens	aging
DB09096	Benzoyl peroxide	7187	HTT	7187	O=C(c1ccccc1)OOC(=O)c1ccccc1	OMPJBNCRMGITSC-UHFFFAOYSA-N	approved	0.00616148	3	Homo sapiens	aging
DB09096	Benzoyl peroxide	7187	MAPT	7187	O=C(c1ccccc1)OOC(=O)c1ccccc1	OMPJBNCRMGITSC-UHFFFAOYSA-N	approved	0.00579971	4	Homo sapiens	aging
DB09096	Benzoyl peroxide	7187	LMNA	7187	O=C(c1ccccc1)OOC(=O)c1ccccc1	OMPJBNCRMGITSC-UHFFFAOYSA-N	approved	0.0594234	Known	Homo sapiens	aging
DB09096	Benzoyl peroxide	7187	TSHR	7187	O=C(c1ccccc1)OOC(=O)c1ccccc1	OMPJBNCRMGITSC-UHFFFAOYSA-N	approved	0.00995557	1	#N/A	aging
DB09096	Benzoyl peroxide	7187	ALDH1A1	7187	O=C(c1ccccc1)OOC(=O)c1ccccc1	OMPJBNCRMGITSC-UHFFFAOYSA-N	approved	0.00572955	5	#N/A	aging
DB09084	Benzydamine	12555	HIF1A	12555	CN(CCCOc1nn(c2c1cccc2)Cc1ccccc1)C	CNBGNNVCVSKAQZ-UHFFFAOYSA-N	approved	0.0107973	4	Homo sapiens	aging
DB09084	Benzydamine	12555	LMNA	12555	CN(CCCOc1nn(c2c1cccc2)Cc1ccccc1)C	CNBGNNVCVSKAQZ-UHFFFAOYSA-N	approved	0.00767234	5	Homo sapiens	aging
DB06770	Benzyl alcohol	244	LMNA	244	OCc1ccccc1	WVDDGKGOMKODPV-UHFFFAOYSA-N	approved	0.0107472	1	Homo sapiens	aging
DB06770	Benzyl alcohol	244	TP53	244	OCc1ccccc1	WVDDGKGOMKODPV-UHFFFAOYSA-N	approved	0.00805488	2	Homo sapiens	aging
DB06770	Benzyl alcohol	244	LTA4H	244	OCc1ccccc1	WVDDGKGOMKODPV-UHFFFAOYSA-N	approved	0.00682057	3	#N/A	aging
DB06770	Benzyl alcohol	244	TBXAS1	244	OCc1ccccc1	WVDDGKGOMKODPV-UHFFFAOYSA-N	approved	0.00587072	4	#N/A	aging
DB06770	Benzyl alcohol	244	DAO	244	OCc1ccccc1	WVDDGKGOMKODPV-UHFFFAOYSA-N	approved	0.00536917	5	#N/A	aging
DB06770	Benzyl alcohol	244	TSHR	244	OCc1ccccc1	WVDDGKGOMKODPV-UHFFFAOYSA-N	approved	0.118977	Known	#N/A	aging
DB00121	Biotin	171548	ESR1	171548	OC(=O)CCCC[C@@H]1SC[C@H]2[C@@H]1NC(=O)N2	YBJHBAHKTGYVGT-ZKWXMUAHSA-N	approved; nutraceutical	0.0193495	5	Homo sapiens	aging
DB00121	Biotin	171548	ABL1	171548	OC(=O)CCCC[C@@H]1SC[C@H]2[C@@H]1NC(=O)N2	YBJHBAHKTGYVGT-ZKWXMUAHSA-N	approved; nutraceutical	0.113773	Known	Homo sapiens	aging
DB00121	Biotin	171548	BCR	171548	OC(=O)CCCC[C@@H]1SC[C@H]2[C@@H]1NC(=O)N2	YBJHBAHKTGYVGT-ZKWXMUAHSA-N	approved; nutraceutical	0.119221	1	#N/A	aging
DB00121	Biotin	171548	NQO2	171548	OC(=O)CCCC[C@@H]1SC[C@H]2[C@@H]1NC(=O)N2	YBJHBAHKTGYVGT-ZKWXMUAHSA-N	approved; nutraceutical	0.0276561	3	#N/A	aging
DB03568	Butanoic acid	264	HDAC1	264	CCCC(=O)O	FERIUCNNQQJTOY-UHFFFAOYSA-N	experimental	0.0179087	2	Homo sapiens	aging
DB03568	Butanoic acid	264	HDAC3	264	CCCC(=O)O	FERIUCNNQQJTOY-UHFFFAOYSA-N	experimental	0.370657	Known	Homo sapiens	aging
DB03568	Butanoic acid	264	HDAC10	264	CCCC(=O)O	FERIUCNNQQJTOY-UHFFFAOYSA-N	experimental	0.0253217	1	#N/A	aging
DB03568	Butanoic acid	264	NEK6	264	CCCC(=O)O	FERIUCNNQQJTOY-UHFFFAOYSA-N	experimental	0.0179053	3	#N/A	aging
DB03568	Butanoic acid	264	PKN1	264	CCCC(=O)O	FERIUCNNQQJTOY-UHFFFAOYSA-N	experimental	0.0179053	4	#N/A	aging
DB03568	Butanoic acid	264	HDAC8	264	CCCC(=O)O	FERIUCNNQQJTOY-UHFFFAOYSA-N	experimental	0.0146423	5	#N/A	aging
DB01880	Caffeic acid	689043	LMNA	689043	OC(=O)/C=C/c1ccc(c(c1)O)O	QAIPRVGONGVQAS-DUXPYHPUSA-N	experimental	0.00601535	Known	Homo sapiens	aging
DB01880	Caffeic acid	689043	MAPT	689043	OC(=O)/C=C/c1ccc(c(c1)O)O	QAIPRVGONGVQAS-DUXPYHPUSA-N	experimental	0.00687463	Known	Homo sapiens	aging
DB01880	Caffeic acid	689043	NFKB1	689043	OC(=O)/C=C/c1ccc(c(c1)O)O	QAIPRVGONGVQAS-DUXPYHPUSA-N	experimental	0.00635738	Known	Homo sapiens	aging
DB01880	Caffeic acid	689043	PTPN1	689043	OC(=O)/C=C/c1ccc(c(c1)O)O	QAIPRVGONGVQAS-DUXPYHPUSA-N	experimental	0.00559215	Known	Homo sapiens	aging
DB01880	Caffeic acid	689043	MAPK1	689043	OC(=O)/C=C/c1ccc(c(c1)O)O	QAIPRVGONGVQAS-DUXPYHPUSA-N	experimental	0.00740659	Known	homologous analysis	aging
DB01880	Caffeic acid	689043	CA4	689043	OC(=O)/C=C/c1ccc(c(c1)O)O	QAIPRVGONGVQAS-DUXPYHPUSA-N	experimental	0.0134135	1	#N/A	aging
DB01880	Caffeic acid	689043	CA13	689043	OC(=O)/C=C/c1ccc(c(c1)O)O	QAIPRVGONGVQAS-DUXPYHPUSA-N	experimental	0.0076397	2	#N/A	aging
DB01880	Caffeic acid	689043	MMP12	689043	OC(=O)/C=C/c1ccc(c(c1)O)O	QAIPRVGONGVQAS-DUXPYHPUSA-N	experimental	0.00438122	3	#N/A	aging
DB01880	Caffeic acid	689043	ALDH1A1	689043	OC(=O)/C=C/c1ccc(c(c1)O)O	QAIPRVGONGVQAS-DUXPYHPUSA-N	experimental	0.00375173	5	#N/A	aging
DB01880	Caffeic acid	689043	CA1	689043	OC(=O)/C=C/c1ccc(c(c1)O)O	QAIPRVGONGVQAS-DUXPYHPUSA-N	experimental	0.0211758	Known	#N/A	aging
DB01880	Caffeic acid	689043	CA12	689043	OC(=O)/C=C/c1ccc(c(c1)O)O	QAIPRVGONGVQAS-DUXPYHPUSA-N	experimental	0.0222288	Known	#N/A	aging
DB01880	Caffeic acid	689043	CA14	689043	OC(=O)/C=C/c1ccc(c(c1)O)O	QAIPRVGONGVQAS-DUXPYHPUSA-N	experimental	0.0184168	Known	#N/A	aging
DB01880	Caffeic acid	689043	CA2	689043	OC(=O)/C=C/c1ccc(c(c1)O)O	QAIPRVGONGVQAS-DUXPYHPUSA-N	experimental	0.0210526	Known	#N/A	aging
DB01880	Caffeic acid	689043	CA3	689043	OC(=O)/C=C/c1ccc(c(c1)O)O	QAIPRVGONGVQAS-DUXPYHPUSA-N	experimental	0.0137958	Known	#N/A	aging
DB01880	Caffeic acid	689043	CA5A	689043	OC(=O)/C=C/c1ccc(c(c1)O)O	QAIPRVGONGVQAS-DUXPYHPUSA-N	experimental	0.0173022	Known	#N/A	aging
DB01880	Caffeic acid	689043	CA5B	689043	OC(=O)/C=C/c1ccc(c(c1)O)O	QAIPRVGONGVQAS-DUXPYHPUSA-N	experimental	0.0161275	Known	#N/A	aging
DB01880	Caffeic acid	689043	CA6	689043	OC(=O)/C=C/c1ccc(c(c1)O)O	QAIPRVGONGVQAS-DUXPYHPUSA-N	experimental	0.015147	Known	#N/A	aging
DB01880	Caffeic acid	689043	CA7	689043	OC(=O)/C=C/c1ccc(c(c1)O)O	QAIPRVGONGVQAS-DUXPYHPUSA-N	experimental	0.0204688	Known	#N/A	aging
DB01880	Caffeic acid	689043	CA9	689043	OC(=O)/C=C/c1ccc(c(c1)O)O	QAIPRVGONGVQAS-DUXPYHPUSA-N	experimental	0.0211547	Known	#N/A	aging
DB01880	Caffeic acid	689043	GAA	689043	OC(=O)/C=C/c1ccc(c(c1)O)O	QAIPRVGONGVQAS-DUXPYHPUSA-N	experimental	0.00666549	Known	#N/A	aging
DB01880	Caffeic acid	689043	HSD17B10	689043	OC(=O)/C=C/c1ccc(c(c1)O)O	QAIPRVGONGVQAS-DUXPYHPUSA-N	experimental	0.0082313	Known	#N/A	aging
DB01880	Caffeic acid	689043	KDM4E	689043	OC(=O)/C=C/c1ccc(c(c1)O)O	QAIPRVGONGVQAS-DUXPYHPUSA-N	experimental	0.00675038	Known	#N/A	aging
DB01880	Caffeic acid	689043	KMT2A	689043	OC(=O)/C=C/c1ccc(c(c1)O)O	QAIPRVGONGVQAS-DUXPYHPUSA-N	experimental	0.00610318	Known	#N/A	aging
DB01880	Caffeic acid	689043	MMP1	689043	OC(=O)/C=C/c1ccc(c(c1)O)O	QAIPRVGONGVQAS-DUXPYHPUSA-N	experimental	0.0123224	Known	#N/A	aging
DB01880	Caffeic acid	689043	MMP2	689043	OC(=O)/C=C/c1ccc(c(c1)O)O	QAIPRVGONGVQAS-DUXPYHPUSA-N	experimental	0.0110843	Known	#N/A	aging
DB01880	Caffeic acid	689043	MMP9	689043	OC(=O)/C=C/c1ccc(c(c1)O)O	QAIPRVGONGVQAS-DUXPYHPUSA-N	experimental	0.0110809	Known	#N/A	aging
DB01880	Caffeic acid	689043	TDP1	689043	OC(=O)/C=C/c1ccc(c(c1)O)O	QAIPRVGONGVQAS-DUXPYHPUSA-N	experimental	0.00711607	Known	#N/A	aging
DB04690	Camptothecin	24360	MAPT	24360	CC[C@@]1(O)C(=O)OCc2c1cc1c3nc4ccccc4cc3Cn1c2=O	VSJKWCGYPAHWDS-FQEVSTJZSA-N	experimental	0.00659482	2	Homo sapiens	aging
DB04690	Camptothecin	24360	HIF1A	24360	CC[C@@]1(O)C(=O)OCc2c1cc1c3nc4ccccc4cc3Cn1c2=O	VSJKWCGYPAHWDS-FQEVSTJZSA-N	experimental	0.010024	Known	Homo sapiens	aging
DB04690	Camptothecin	24360	HTT	24360	CC[C@@]1(O)C(=O)OCc2c1cc1c3nc4ccccc4cc3Cn1c2=O	VSJKWCGYPAHWDS-FQEVSTJZSA-N	experimental	0.0100004	Known	Homo sapiens	aging
DB04690	Camptothecin	24360	LMNA	24360	CC[C@@]1(O)C(=O)OCc2c1cc1c3nc4ccccc4cc3Cn1c2=O	VSJKWCGYPAHWDS-FQEVSTJZSA-N	experimental	0.0102856	Known	Homo sapiens	aging
DB04690	Camptothecin	24360	MTOR	24360	CC[C@@]1(O)C(=O)OCc2c1cc1c3nc4ccccc4cc3Cn1c2=O	VSJKWCGYPAHWDS-FQEVSTJZSA-N	experimental	0.00974513	Known	Homo sapiens	aging
DB04690	Camptothecin	24360	NFKB1	24360	CC[C@@]1(O)C(=O)OCc2c1cc1c3nc4ccccc4cc3Cn1c2=O	VSJKWCGYPAHWDS-FQEVSTJZSA-N	experimental	0.00977487	Known	Homo sapiens	aging
DB04690	Camptothecin	24360	TOP1	24360	CC[C@@]1(O)C(=O)OCc2c1cc1c3nc4ccccc4cc3Cn1c2=O	VSJKWCGYPAHWDS-FQEVSTJZSA-N	experimental	0.0114482	Known	Homo sapiens	aging
DB04690	Camptothecin	24360	TP53	24360	CC[C@@]1(O)C(=O)OCc2c1cc1c3nc4ccccc4cc3Cn1c2=O	VSJKWCGYPAHWDS-FQEVSTJZSA-N	experimental	0.0124164	Known	Homo sapiens	aging
DB04690	Camptothecin	24360	ALOX15	24360	CC[C@@]1(O)C(=O)OCc2c1cc1c3nc4ccccc4cc3Cn1c2=O	VSJKWCGYPAHWDS-FQEVSTJZSA-N	experimental	0.00675216	1	#N/A	aging
DB04690	Camptothecin	24360	TSHR	24360	CC[C@@]1(O)C(=O)OCc2c1cc1c3nc4ccccc4cc3Cn1c2=O	VSJKWCGYPAHWDS-FQEVSTJZSA-N	experimental	0.00500146	3	#N/A	aging
DB04690	Camptothecin	24360	NPC1	24360	CC[C@@]1(O)C(=O)OCc2c1cc1c3nc4ccccc4cc3Cn1c2=O	VSJKWCGYPAHWDS-FQEVSTJZSA-N	experimental	0.00499637	4	#N/A	aging
DB04690	Camptothecin	24360	ALDH1A1	24360	CC[C@@]1(O)C(=O)OCc2c1cc1c3nc4ccccc4cc3Cn1c2=O	VSJKWCGYPAHWDS-FQEVSTJZSA-N	experimental	0.0104438	Known	#N/A	aging
DB04690	Camptothecin	24360	CHEK1	24360	CC[C@@]1(O)C(=O)OCc2c1cc1c3nc4ccccc4cc3Cn1c2=O	VSJKWCGYPAHWDS-FQEVSTJZSA-N	experimental	0.0114686	Known	#N/A	aging
DB04690	Camptothecin	24360	GLA	24360	CC[C@@]1(O)C(=O)OCc2c1cc1c3nc4ccccc4cc3Cn1c2=O	VSJKWCGYPAHWDS-FQEVSTJZSA-N	experimental	0.0173203	Known	#N/A	aging
DB04690	Camptothecin	24360	GMNN	24360	CC[C@@]1(O)C(=O)OCc2c1cc1c3nc4ccccc4cc3Cn1c2=O	VSJKWCGYPAHWDS-FQEVSTJZSA-N	experimental	0.00874095	Known	#N/A	aging
DB04690	Camptothecin	24360	HBB	24360	CC[C@@]1(O)C(=O)OCc2c1cc1c3nc4ccccc4cc3Cn1c2=O	VSJKWCGYPAHWDS-FQEVSTJZSA-N	experimental	0.0171057	Known	#N/A	aging
DB04690	Camptothecin	24360	HNRNPA1	24360	CC[C@@]1(O)C(=O)OCc2c1cc1c3nc4ccccc4cc3Cn1c2=O	VSJKWCGYPAHWDS-FQEVSTJZSA-N	experimental	0.0135689	Known	#N/A	aging
DB04690	Camptothecin	24360	HPGD	24360	CC[C@@]1(O)C(=O)OCc2c1cc1c3nc4ccccc4cc3Cn1c2=O	VSJKWCGYPAHWDS-FQEVSTJZSA-N	experimental	0.0103621	Known	#N/A	aging
DB04690	Camptothecin	24360	HSD17B10	24360	CC[C@@]1(O)C(=O)OCc2c1cc1c3nc4ccccc4cc3Cn1c2=O	VSJKWCGYPAHWDS-FQEVSTJZSA-N	experimental	0.010625	Known	#N/A	aging
DB04690	Camptothecin	24360	KDM4E	24360	CC[C@@]1(O)C(=O)OCc2c1cc1c3nc4ccccc4cc3Cn1c2=O	VSJKWCGYPAHWDS-FQEVSTJZSA-N	experimental	0.00808059	Known	#N/A	aging
DB04690	Camptothecin	24360	PMP22	24360	CC[C@@]1(O)C(=O)OCc2c1cc1c3nc4ccccc4cc3Cn1c2=O	VSJKWCGYPAHWDS-FQEVSTJZSA-N	experimental	0.0122706	Known	#N/A	aging
DB04690	Camptothecin	24360	RAB9A	24360	CC[C@@]1(O)C(=O)OCc2c1cc1c3nc4ccccc4cc3Cn1c2=O	VSJKWCGYPAHWDS-FQEVSTJZSA-N	experimental	0.00719102	Known	#N/A	aging
DB04690	Camptothecin	24360	SMN1	24360	CC[C@@]1(O)C(=O)OCc2c1cc1c3nc4ccccc4cc3Cn1c2=O	VSJKWCGYPAHWDS-FQEVSTJZSA-N	experimental	0.00939642	Known	#N/A	aging
DB04690	Camptothecin	24360	SSTR1	24360	CC[C@@]1(O)C(=O)OCc2c1cc1c3nc4ccccc4cc3Cn1c2=O	VSJKWCGYPAHWDS-FQEVSTJZSA-N	experimental	0.0135689	Known	#N/A	aging
DB04690	Camptothecin	24360	THPO	24360	CC[C@@]1(O)C(=O)OCc2c1cc1c3nc4ccccc4cc3Cn1c2=O	VSJKWCGYPAHWDS-FQEVSTJZSA-N	experimental	0.0104802	Known	#N/A	aging
DB04519	Caprylic acid	379	TP53	379	CCCCCCCC(=O)O	WWZKQHOCKIZLMA-UHFFFAOYSA-N	experimental	0.00593685	1	Homo sapiens	aging
DB04519	Caprylic acid	379	BLM	379	CCCCCCCC(=O)O	WWZKQHOCKIZLMA-UHFFFAOYSA-N	experimental	0.00420176	4	Homo sapiens	aging
DB04519	Caprylic acid	379	HTT	379	CCCCCCCC(=O)O	WWZKQHOCKIZLMA-UHFFFAOYSA-N	experimental	0.00417816	5	Homo sapiens	aging
DB04519	Caprylic acid	379	LMNA	379	CCCCCCCC(=O)O	WWZKQHOCKIZLMA-UHFFFAOYSA-N	experimental	0.0350281	Known	Homo sapiens	aging
DB04519	Caprylic acid	379	HSD17B10	379	CCCCCCCC(=O)O	WWZKQHOCKIZLMA-UHFFFAOYSA-N	experimental	0.00429174	3	#N/A	aging
DB04519	Caprylic acid	379	TSHR	379	CCCCCCCC(=O)O	WWZKQHOCKIZLMA-UHFFFAOYSA-N	experimental	0.0643775	Known	#N/A	aging
DB01486	Cathine	441457	HIF1A	441457	O[C@@H](c1ccccc1)[C@@H](N)C	DLNKOYKMWOXYQA-IONNQARKSA-N	experimental; illicit	0.0362518	Known	Homo sapiens	aging
DB01486	Cathine	441457	LMNA	441457	O[C@@H](c1ccccc1)[C@@H](N)C	DLNKOYKMWOXYQA-IONNQARKSA-N	experimental; illicit	0.0358828	Known	Homo sapiens	aging
DB01486	Cathine	441457	HSD17B10	441457	O[C@@H](c1ccccc1)[C@@H](N)C	DLNKOYKMWOXYQA-IONNQARKSA-N	experimental; illicit	0.00965482	1	#N/A	aging
DB01486	Cathine	441457	TSHR	441457	O[C@@H](c1ccccc1)[C@@H](N)C	DLNKOYKMWOXYQA-IONNQARKSA-N	experimental; illicit	0.00837209	2	#N/A	aging
DB01486	Cathine	441457	ALDH1A1	441457	O[C@@H](c1ccccc1)[C@@H](N)C	DLNKOYKMWOXYQA-IONNQARKSA-N	experimental; illicit	0.00760112	4	#N/A	aging
DB06777	Chenodeoxycholic acid	10133|388708	POLB	10133|388708	OC1CCC2(C(C1)CC(C1C2CCC2(C1CCC2C(CCC(=O)O)C)C)O)C	RUDATBOHQWOJDD-BSWAIDMHSA-N|RUDATBOHQWOJDD-HEGLNSLBSA-N	approved	0.00900885	5	Homo sapiens	aging
DB06777	Chenodeoxycholic acid	10133|388708	G6PD	10133|388708	OC1CCC2(C(C1)CC(C1C2CCC2(C1CCC2C(CCC(=O)O)C)C)O)C	RUDATBOHQWOJDD-BSWAIDMHSA-N|RUDATBOHQWOJDD-HEGLNSLBSA-N	approved	0.0231025	2	homologous analysis	aging
DB06777	Chenodeoxycholic acid	10133|388708	UGT1A1	10133|388708	OC1CCC2(C(C1)CC(C1C2CCC2(C1CCC2C(CCC(=O)O)C)C)O)C	RUDATBOHQWOJDD-BSWAIDMHSA-N|RUDATBOHQWOJDD-HEGLNSLBSA-N	approved	0.0278863	1	#N/A	aging
DB06777	Chenodeoxycholic acid	10133|388708	SHBG	10133|388708	OC1CCC2(C(C1)CC(C1C2CCC2(C1CCC2C(CCC(=O)O)C)C)O)C	RUDATBOHQWOJDD-BSWAIDMHSA-N|RUDATBOHQWOJDD-HEGLNSLBSA-N	approved	0.0151615	3	#N/A	aging
DB06777	Chenodeoxycholic acid	10133|388708	SLC10A2	10133|388708	OC1CCC2(C(C1)CC(C1C2CCC2(C1CCC2C(CCC(=O)O)C)C)O)C	RUDATBOHQWOJDD-BSWAIDMHSA-N|RUDATBOHQWOJDD-HEGLNSLBSA-N	approved	0.0150979	4	#N/A	aging
DB06777	Chenodeoxycholic acid	10133|388708	GPBAR1	10133|388708	OC1CCC2(C(C1)CC(C1C2CCC2(C1CCC2C(CCC(=O)O)C)C)O)C	RUDATBOHQWOJDD-BSWAIDMHSA-N|RUDATBOHQWOJDD-HEGLNSLBSA-N	approved	0.0798913	Known	#N/A	aging
DB06777	Chenodeoxycholic acid	10133|388708	NR1H4	10133|388708	OC1CCC2(C(C1)CC(C1C2CCC2(C1CCC2C(CCC(=O)O)C)C)O)C	RUDATBOHQWOJDD-BSWAIDMHSA-N|RUDATBOHQWOJDD-HEGLNSLBSA-N	approved	0.117391	Known	#N/A	aging
DB09270	Coenzyme Q10	5281915	BLM	5281915	COC1=C(OC)C(=O)C(=C(C1=O)C/C=C(/CC/C=C(/CC/C=C(/CC/C=C(/CC/C=C(/CC/C=C(/CC/C=C(/CC/C=C(/CC/C=C(/CCC=C(C)C)\C)\C)\C)\C)\C)\C)\C)\C)\C)C	ACTIUHUUMQJHFO-UPTCCGCDSA-N	experimental	0.00708476	2	Homo sapiens	aging
DB09270	Coenzyme Q10	5281915	HTT	5281915	COC1=C(OC)C(=O)C(=C(C1=O)C/C=C(/CC/C=C(/CC/C=C(/CC/C=C(/CC/C=C(/CC/C=C(/CC/C=C(/CC/C=C(/CC/C=C(/CCC=C(C)C)\C)\C)\C)\C)\C)\C)\C)\C)\C)C	ACTIUHUUMQJHFO-UPTCCGCDSA-N	experimental	0.00613836	3	Homo sapiens	aging
DB09270	Coenzyme Q10	5281915	MAPT	5281915	COC1=C(OC)C(=O)C(=C(C1=O)C/C=C(/CC/C=C(/CC/C=C(/CC/C=C(/CC/C=C(/CC/C=C(/CC/C=C(/CC/C=C(/CC/C=C(/CCC=C(C)C)\C)\C)\C)\C)\C)\C)\C)\C)\C)C	ACTIUHUUMQJHFO-UPTCCGCDSA-N	experimental	0.00568075	4	Homo sapiens	aging
DB09270	Coenzyme Q10	5281915	LMNA	5281915	COC1=C(OC)C(=O)C(=C(C1=O)C/C=C(/CC/C=C(/CC/C=C(/CC/C=C(/CC/C=C(/CC/C=C(/CC/C=C(/CC/C=C(/CC/C=C(/CCC=C(C)C)\C)\C)\C)\C)\C)\C)\C)\C)\C)C	ACTIUHUUMQJHFO-UPTCCGCDSA-N	experimental	0.0593085	Known	Homo sapiens	aging
DB09270	Coenzyme Q10	5281915	TSHR	5281915	COC1=C(OC)C(=O)C(=C(C1=O)C/C=C(/CC/C=C(/CC/C=C(/CC/C=C(/CC/C=C(/CC/C=C(/CC/C=C(/CC/C=C(/CC/C=C(/CCC=C(C)C)\C)\C)\C)\C)\C)\C)\C)\C)\C)C	ACTIUHUUMQJHFO-UPTCCGCDSA-N	experimental	0.00968161	1	#N/A	aging
DB09270	Coenzyme Q10	5281915	ALDH1A1	5281915	COC1=C(OC)C(=O)C(=C(C1=O)C/C=C(/CC/C=C(/CC/C=C(/CC/C=C(/CC/C=C(/CC/C=C(/CC/C=C(/CC/C=C(/CC/C=C(/CCC=C(C)C)\C)\C)\C)\C)\C)\C)\C)\C)\C)C	ACTIUHUUMQJHFO-UPTCCGCDSA-N	experimental	0.00561789	5	#N/A	aging
DB09114	Colfosceril palmitate	452110	TP53	452110	CCCCCCCCCCCCCCCC(=O)OC[C@@H](OC(=O)CCCCCCCCCCCCCCC)COP(=O)(OCC[N+](C)(C)C)[O-]	KILNVBDSWZSGLL-KXQOOQHDSA-N	approved	0.00864721	2	Homo sapiens	aging
DB09114	Colfosceril palmitate	452110	MAPT	452110	CCCCCCCCCCCCCCCC(=O)OC[C@@H](OC(=O)CCCCCCCCCCCCCCC)COP(=O)(OCC[N+](C)(C)C)[O-]	KILNVBDSWZSGLL-KXQOOQHDSA-N	approved	0.00723766	3	Homo sapiens	aging
DB09114	Colfosceril palmitate	452110	LMNA	452110	CCCCCCCCCCCCCCCC(=O)OC[C@@H](OC(=O)CCCCCCCCCCCCCCC)COP(=O)(OCC[N+](C)(C)C)[O-]	KILNVBDSWZSGLL-KXQOOQHDSA-N	approved	0.00658542	4	Homo sapiens	aging
DB09114	Colfosceril palmitate	452110	PARP1	452110	CCCCCCCCCCCCCCCC(=O)OC[C@@H](OC(=O)CCCCCCCCCCCCCCC)COP(=O)(OCC[N+](C)(C)C)[O-]	KILNVBDSWZSGLL-KXQOOQHDSA-N	approved	0.00546014	5	Homo sapiens	aging
DB09114	Colfosceril palmitate	452110	SMN1	452110	CCCCCCCCCCCCCCCC(=O)OC[C@@H](OC(=O)CCCCCCCCCCCCCCC)COP(=O)(OCC[N+](C)(C)C)[O-]	KILNVBDSWZSGLL-KXQOOQHDSA-N	approved	0.0636825	Known	#N/A	aging
DB00091	Cyclosporine	5280754	BLM	5280754	C/C=C/CC(C(C1C(=O)NC(CC)C(=O)N(C)CC(=O)N(C)C(CC(C)C)C(=O)NC(C(C)C)C(=O)N(C)C(CC(C)C)C(=O)NC(C(=O)NC(C(=O)N(C(C(=O)N(C(C(=O)N(C(C(=O)N1C)C(C)C)C)CC(C)C)C)CC(C)C)C)C)C)O)C	PMATZTZNYRCHOR-IMVLJIQESA-N	approved; investigational; vet_approved	0.00796935	2	Homo sapiens	aging
DB00091	Cyclosporine	5280754	POLB	5280754	C/C=C/CC(C(C1C(=O)NC(CC)C(=O)N(C)CC(=O)N(C)C(CC(C)C)C(=O)NC(C(C)C)C(=O)N(C)C(CC(C)C)C(=O)NC(C(=O)NC(C(=O)N(C(C(=O)N(C(C(=O)N(C(C(=O)N1C)C(C)C)C)CC(C)C)C)CC(C)C)C)C)C)O)C	PMATZTZNYRCHOR-IMVLJIQESA-N	approved; investigational; vet_approved	0.00622816	5	Homo sapiens	aging
DB00091	Cyclosporine	5280754	APEX1	5280754	C/C=C/CC(C(C1C(=O)NC(CC)C(=O)N(C)CC(=O)N(C)C(CC(C)C)C(=O)NC(C(C)C)C(=O)N(C)C(CC(C)C)C(=O)NC(C(=O)NC(C(=O)N(C(C(=O)N(C(C(=O)N(C(C(=O)N1C)C(C)C)C)CC(C)C)C)CC(C)C)C)C)C)O)C	PMATZTZNYRCHOR-IMVLJIQESA-N	approved; investigational; vet_approved	0.0110944	Known	Homo sapiens	aging
DB00091	Cyclosporine	5280754	LMNA	5280754	C/C=C/CC(C(C1C(=O)NC(CC)C(=O)N(C)CC(=O)N(C)C(CC(C)C)C(=O)NC(C(C)C)C(=O)N(C)C(CC(C)C)C(=O)NC(C(=O)NC(C(=O)N(C(C(=O)N(C(C(=O)N(C(C(=O)N1C)C(C)C)C)CC(C)C)C)CC(C)C)C)C)C)O)C	PMATZTZNYRCHOR-IMVLJIQESA-N	approved; investigational; vet_approved	0.0142819	Known	Homo sapiens	aging
DB00091	Cyclosporine	5280754	MAPT	5280754	C/C=C/CC(C(C1C(=O)NC(CC)C(=O)N(C)CC(=O)N(C)C(CC(C)C)C(=O)NC(C(C)C)C(=O)N(C)C(CC(C)C)C(=O)NC(C(=O)NC(C(=O)N(C(C(=O)N(C(C(=O)N(C(C(=O)N1C)C(C)C)C)CC(C)C)C)CC(C)C)C)C)C)O)C	PMATZTZNYRCHOR-IMVLJIQESA-N	approved; investigational; vet_approved	0.0147991	Known	Homo sapiens	aging
DB00091	Cyclosporine	5280754	MTOR	5280754	C/C=C/CC(C(C1C(=O)NC(CC)C(=O)N(C)CC(=O)N(C)C(CC(C)C)C(=O)NC(C(C)C)C(=O)N(C)C(CC(C)C)C(=O)NC(C(=O)NC(C(=O)N(C(C(=O)N(C(C(=O)N(C(C(=O)N1C)C(C)C)C)CC(C)C)C)CC(C)C)C)C)C)O)C	PMATZTZNYRCHOR-IMVLJIQESA-N	approved; investigational; vet_approved	0.0131216	Known	Homo sapiens	aging
DB00091	Cyclosporine	5280754	ALOX15	5280754	C/C=C/CC(C(C1C(=O)NC(CC)C(=O)N(C)CC(=O)N(C)C(CC(C)C)C(=O)NC(C(C)C)C(=O)N(C)C(CC(C)C)C(=O)NC(C(=O)NC(C(=O)N(C(C(=O)N(C(C(=O)N(C(C(=O)N1C)C(C)C)C)CC(C)C)C)CC(C)C)C)C)C)O)C	PMATZTZNYRCHOR-IMVLJIQESA-N	approved; investigational; vet_approved	0.00822207	1	#N/A	aging
DB00091	Cyclosporine	5280754	MT-ND4	5280754	C/C=C/CC(C(C1C(=O)NC(CC)C(=O)N(C)CC(=O)N(C)C(CC(C)C)C(=O)NC(C(C)C)C(=O)N(C)C(CC(C)C)C(=O)NC(C(=O)NC(C(=O)N(C(C(=O)N(C(C(=O)N(C(C(=O)N1C)C(C)C)C)CC(C)C)C)CC(C)C)C)C)C)O)C	PMATZTZNYRCHOR-IMVLJIQESA-N	approved; investigational; vet_approved	0.00664058	3	#N/A	aging
DB00091	Cyclosporine	5280754	THPO	5280754	C/C=C/CC(C(C1C(=O)NC(CC)C(=O)N(C)CC(=O)N(C)C(CC(C)C)C(=O)NC(C(C)C)C(=O)N(C)C(CC(C)C)C(=O)NC(C(=O)NC(C(=O)N(C(C(=O)N(C(C(=O)N(C(C(=O)N1C)C(C)C)C)CC(C)C)C)CC(C)C)C)C)C)O)C	PMATZTZNYRCHOR-IMVLJIQESA-N	approved; investigational; vet_approved	0.00656208	4	#N/A	aging
DB00091	Cyclosporine	5280754	GMNN	5280754	C/C=C/CC(C(C1C(=O)NC(CC)C(=O)N(C)CC(=O)N(C)C(CC(C)C)C(=O)NC(C(C)C)C(=O)N(C)C(CC(C)C)C(=O)NC(C(=O)NC(C(=O)N(C(C(=O)N(C(C(=O)N(C(C(=O)N1C)C(C)C)C)CC(C)C)C)CC(C)C)C)C)C)O)C	PMATZTZNYRCHOR-IMVLJIQESA-N	approved; investigational; vet_approved	0.0121704	Known	#N/A	aging
DB00091	Cyclosporine	5280754	KMT2A	5280754	C/C=C/CC(C(C1C(=O)NC(CC)C(=O)N(C)CC(=O)N(C)C(CC(C)C)C(=O)NC(C(C)C)C(=O)N(C)C(CC(C)C)C(=O)NC(C(=O)NC(C(=O)N(C(C(=O)N(C(C(=O)N(C(C(=O)N1C)C(C)C)C)CC(C)C)C)CC(C)C)C)C)C)O)C	PMATZTZNYRCHOR-IMVLJIQESA-N	approved; investigational; vet_approved	0.0126499	Known	#N/A	aging
DB00091	Cyclosporine	5280754	NPSR1	5280754	C/C=C/CC(C(C1C(=O)NC(CC)C(=O)N(C)CC(=O)N(C)C(CC(C)C)C(=O)NC(C(C)C)C(=O)N(C)C(CC(C)C)C(=O)NC(C(=O)NC(C(=O)N(C(C(=O)N(C(C(=O)N(C(C(=O)N1C)C(C)C)C)CC(C)C)C)CC(C)C)C)C)C)O)C	PMATZTZNYRCHOR-IMVLJIQESA-N	approved; investigational; vet_approved	0.017625	Known	#N/A	aging
DB00091	Cyclosporine	5280754	PMP22	5280754	C/C=C/CC(C(C1C(=O)NC(CC)C(=O)N(C)CC(=O)N(C)C(CC(C)C)C(=O)NC(C(C)C)C(=O)N(C)C(CC(C)C)C(=O)NC(C(=O)NC(C(=O)N(C(C(=O)N(C(C(=O)N(C(C(=O)N1C)C(C)C)C)CC(C)C)C)CC(C)C)C)C)C)O)C	PMATZTZNYRCHOR-IMVLJIQESA-N	approved; investigational; vet_approved	0.0188593	Known	#N/A	aging
DB00091	Cyclosporine	5280754	USP2	5280754	C/C=C/CC(C(C1C(=O)NC(CC)C(=O)N(C)CC(=O)N(C)C(CC(C)C)C(=O)NC(C(C)C)C(=O)N(C)C(CC(C)C)C(=O)NC(C(=O)NC(C(=O)N(C(C(=O)N(C(C(=O)N(C(C(=O)N1C)C(C)C)C)CC(C)C)C)CC(C)C)C)C)C)O)C	PMATZTZNYRCHOR-IMVLJIQESA-N	approved; investigational; vet_approved	0.0132047	Known	#N/A	aging
DB02115	Daidzin	107971	NR3C1	107971	OC[C@H]1O[C@@H](Oc2ccc3c(c2)occ(c3=O)c2ccc(cc2)O)[C@@H]([C@H]([C@@H]1O)O)O	KYQZWONCHDNPDP-QNDFHXLGSA-N	experimental	0.0171427	1	Homo sapiens	aging
DB02115	Daidzin	107971	AR	107971	OC[C@H]1O[C@@H](Oc2ccc3c(c2)occ(c3=O)c2ccc(cc2)O)[C@@H]([C@H]([C@@H]1O)O)O	KYQZWONCHDNPDP-QNDFHXLGSA-N	experimental	0.0150778	2	Homo sapiens	aging
DB02115	Daidzin	107971	MAPT	107971	OC[C@H]1O[C@@H](Oc2ccc3c(c2)occ(c3=O)c2ccc(cc2)O)[C@@H]([C@H]([C@@H]1O)O)O	KYQZWONCHDNPDP-QNDFHXLGSA-N	experimental	0.0113862	4	Homo sapiens	aging
DB02115	Daidzin	107971	TNF	107971	OC[C@H]1O[C@@H](Oc2ccc3c(c2)occ(c3=O)c2ccc(cc2)O)[C@@H]([C@H]([C@@H]1O)O)O	KYQZWONCHDNPDP-QNDFHXLGSA-N	experimental	0.0105175	5	Homo sapiens	aging
DB02115	Daidzin	107971	IL2	107971	OC[C@H]1O[C@@H](Oc2ccc3c(c2)occ(c3=O)c2ccc(cc2)O)[C@@H]([C@H]([C@@H]1O)O)O	KYQZWONCHDNPDP-QNDFHXLGSA-N	experimental	0.0595715	Known	Homo sapiens	aging
DB02115	Daidzin	107971	F3	107971	OC[C@H]1O[C@@H](Oc2ccc3c(c2)occ(c3=O)c2ccc(cc2)O)[C@@H]([C@H]([C@@H]1O)O)O	KYQZWONCHDNPDP-QNDFHXLGSA-N	experimental	0.0138225	3	#N/A	aging
DB02115	Daidzin	107971	ALDH2	107971	OC[C@H]1O[C@@H](Oc2ccc3c(c2)occ(c3=O)c2ccc(cc2)O)[C@@H]([C@H]([C@@H]1O)O)O	KYQZWONCHDNPDP-QNDFHXLGSA-N	experimental	0.0834578	Known	#N/A	aging
DB02115	Daidzin	107971	NPC1	107971	OC[C@H]1O[C@@H](Oc2ccc3c(c2)occ(c3=O)c2ccc(cc2)O)[C@@H]([C@H]([C@@H]1O)O)O	KYQZWONCHDNPDP-QNDFHXLGSA-N	experimental	0.0405904	Known	#N/A	aging
DB02115	Daidzin	107971	RAB9A	107971	OC[C@H]1O[C@@H](Oc2ccc3c(c2)occ(c3=O)c2ccc(cc2)O)[C@@H]([C@H]([C@@H]1O)O)O	KYQZWONCHDNPDP-QNDFHXLGSA-N	experimental	0.0412695	Known	#N/A	aging
DB06637	Dalfampridine	1727	TP53	1727	Nc1ccncc1	NUKYPUAOHBNCPY-UHFFFAOYSA-N	approved	0.00620073	3	Homo sapiens	aging
DB06637	Dalfampridine	1727	LMNA	1727	Nc1ccncc1	NUKYPUAOHBNCPY-UHFFFAOYSA-N	approved	0.0183423	Known	Homo sapiens	aging
DB06637	Dalfampridine	1727	MAPT	1727	Nc1ccncc1	NUKYPUAOHBNCPY-UHFFFAOYSA-N	approved	0.016966	Known	Homo sapiens	aging
DB06637	Dalfampridine	1727	MAPK1	1727	Nc1ccncc1	NUKYPUAOHBNCPY-UHFFFAOYSA-N	approved	0.0274755	Known	homologous analysis	aging
DB06637	Dalfampridine	1727	ALDH1A1	1727	Nc1ccncc1	NUKYPUAOHBNCPY-UHFFFAOYSA-N	approved	0.00519566	4	#N/A	aging
DB06637	Dalfampridine	1727	SMN1	1727	Nc1ccncc1	NUKYPUAOHBNCPY-UHFFFAOYSA-N	approved	0.0176074	Known	#N/A	aging
DB06637	Dalfampridine	1727	TSHR	1727	Nc1ccncc1	NUKYPUAOHBNCPY-UHFFFAOYSA-N	approved	0.0275574	Known	#N/A	aging
DB04816	Dantron	2950	TP53	2950	Oc1cccc2c1C(=O)c1c(C2=O)cccc1O	QBPFLULOKWLNNW-UHFFFAOYSA-N	investigational; withdrawn	0.00633867	2	Homo sapiens	aging
DB04816	Dantron	2950	LMNA	2950	Oc1cccc2c1C(=O)c1c(C2=O)cccc1O	QBPFLULOKWLNNW-UHFFFAOYSA-N	investigational; withdrawn	0.020497	Known	Homo sapiens	aging
DB04816	Dantron	2950	MAPT	2950	Oc1cccc2c1C(=O)c1c(C2=O)cccc1O	QBPFLULOKWLNNW-UHFFFAOYSA-N	investigational; withdrawn	0.0192731	Known	Homo sapiens	aging
DB04816	Dantron	2950	MAPK1	2950	Oc1cccc2c1C(=O)c1c(C2=O)cccc1O	QBPFLULOKWLNNW-UHFFFAOYSA-N	investigational; withdrawn	0.0333017	Known	homologous analysis	aging
DB04816	Dantron	2950	ALDH1A1	2950	Oc1cccc2c1C(=O)c1c(C2=O)cccc1O	QBPFLULOKWLNNW-UHFFFAOYSA-N	investigational; withdrawn	0.00556552	3	#N/A	aging
DB04816	Dantron	2950	KMT2A	2950	Oc1cccc2c1C(=O)c1c(C2=O)cccc1O	QBPFLULOKWLNNW-UHFFFAOYSA-N	investigational; withdrawn	0.00531243	4	#N/A	aging
DB04816	Dantron	2950	ALOX15	2950	Oc1cccc2c1C(=O)c1c(C2=O)cccc1O	QBPFLULOKWLNNW-UHFFFAOYSA-N	investigational; withdrawn	0.00530108	5	#N/A	aging
DB04816	Dantron	2950	TSHR	2950	Oc1cccc2c1C(=O)c1c(C2=O)cccc1O	QBPFLULOKWLNNW-UHFFFAOYSA-N	investigational; withdrawn	0.0342985	Known	#N/A	aging
DB02655	D-Aspartic Acid	83887	LMNA	83887	OC(=O)C[C@H](C(=O)O)N	CKLJMWTZIZZHCS-UWTATZPHSA-N	experimental	0.0107005	1	Homo sapiens	aging
DB02655	D-Aspartic Acid	83887	TP53	83887	OC(=O)C[C@H](C(=O)O)N	CKLJMWTZIZZHCS-UWTATZPHSA-N	experimental	0.00773987	2	Homo sapiens	aging
DB02655	D-Aspartic Acid	83887	NFKB1	83887	OC(=O)C[C@H](C(=O)O)N	CKLJMWTZIZZHCS-UWTATZPHSA-N	experimental	0.00534456	5	Homo sapiens	aging
DB02655	D-Aspartic Acid	83887	LTA4H	83887	OC(=O)C[C@H](C(=O)O)N	CKLJMWTZIZZHCS-UWTATZPHSA-N	experimental	0.00677051	3	#N/A	aging
DB02655	D-Aspartic Acid	83887	TBXAS1	83887	OC(=O)C[C@H](C(=O)O)N	CKLJMWTZIZZHCS-UWTATZPHSA-N	experimental	0.00587121	4	#N/A	aging
DB02655	D-Aspartic Acid	83887	TSHR	83887	OC(=O)C[C@H](C(=O)O)N	CKLJMWTZIZZHCS-UWTATZPHSA-N	experimental	0.118647	Known	#N/A	aging
DB00132	DB00132	5280934	MAPT	5280934	CC/C=C\C/C=C\C/C=C\CCCCCCCC(=O)O	DTOSIQBPPRVQHS-PDBXOOCHSA-N	approved; nutraceutical	0.010599	Known	Homo sapiens	aging
DB00132	DB00132	5280934	PPARA	5280934	CC/C=C\C/C=C\C/C=C\CCCCCCCC(=O)O	DTOSIQBPPRVQHS-PDBXOOCHSA-N	approved; nutraceutical	0.0272946	Known	Homo sapiens	aging
DB00132	DB00132	5280934	PPARG	5280934	CC/C=C\C/C=C\C/C=C\CCCCCCCC(=O)O	DTOSIQBPPRVQHS-PDBXOOCHSA-N	approved; nutraceutical	0.0253155	Known	Homo sapiens	aging
DB00132	DB00132	5280934	FABP4	5280934	CC/C=C\C/C=C\C/C=C\CCCCCCCC(=O)O	DTOSIQBPPRVQHS-PDBXOOCHSA-N	approved; nutraceutical	0.0121651	2	homologous analysis	aging
DB00132	DB00132	5280934	FABP3	5280934	CC/C=C\C/C=C\C/C=C\CCCCCCCC(=O)O	DTOSIQBPPRVQHS-PDBXOOCHSA-N	approved; nutraceutical	0.0104853	3	homologous analysis	aging
DB00132	DB00132	5280934	PPARD	5280934	CC/C=C\C/C=C\C/C=C\CCCCCCCC(=O)O	DTOSIQBPPRVQHS-PDBXOOCHSA-N	approved; nutraceutical	0.0153569	1	#N/A	aging
DB00132	DB00132	5280934	HPGD	5280934	CC/C=C\C/C=C\C/C=C\CCCCCCCC(=O)O	DTOSIQBPPRVQHS-PDBXOOCHSA-N	approved; nutraceutical	0.00685748	4	#N/A	aging
DB00132	DB00132	5280934	HSD17B10	5280934	CC/C=C\C/C=C\C/C=C\CCCCCCCC(=O)O	DTOSIQBPPRVQHS-PDBXOOCHSA-N	approved; nutraceutical	0.00579166	5	#N/A	aging
DB00132	DB00132	5280934	ALDH1A1	5280934	CC/C=C\C/C=C\C/C=C\CCCCCCCC(=O)O	DTOSIQBPPRVQHS-PDBXOOCHSA-N	approved; nutraceutical	0.0160889	Known	#N/A	aging
DB00132	DB00132	5280934	ALOX15	5280934	CC/C=C\C/C=C\C/C=C\CCCCCCCC(=O)O	DTOSIQBPPRVQHS-PDBXOOCHSA-N	approved; nutraceutical	0.0164566	Known	#N/A	aging
DB00132	DB00132	5280934	FFAR1	5280934	CC/C=C\C/C=C\C/C=C\CCCCCCCC(=O)O	DTOSIQBPPRVQHS-PDBXOOCHSA-N	approved; nutraceutical	0.032793	Known	#N/A	aging
DB00132	DB00132	5280934	FFAR4	5280934	CC/C=C\C/C=C\C/C=C\CCCCCCCC(=O)O	DTOSIQBPPRVQHS-PDBXOOCHSA-N	approved; nutraceutical	0.032793	Known	#N/A	aging
DB00132	DB00132	5280934	NR1I2	5280934	CC/C=C\C/C=C\C/C=C\CCCCCCCC(=O)O	DTOSIQBPPRVQHS-PDBXOOCHSA-N	approved; nutraceutical	0.0261002	Known	#N/A	aging
DB00132	DB00132	5280934	PTGS1	5280934	CC/C=C\C/C=C\C/C=C\CCCCCCCC(=O)O	DTOSIQBPPRVQHS-PDBXOOCHSA-N	approved; nutraceutical	0.0176175	Known	#N/A	aging
DB00132	DB00132	5280934	RECQL	5280934	CC/C=C\C/C=C\C/C=C\CCCCCCCC(=O)O	DTOSIQBPPRVQHS-PDBXOOCHSA-N	approved; nutraceutical	0.0121156	Known	#N/A	aging
DB00132	DB00132	5280934	TDP1	5280934	CC/C=C\C/C=C\C/C=C\CCCCCCCC(=O)O	DTOSIQBPPRVQHS-PDBXOOCHSA-N	approved; nutraceutical	0.0134727	Known	#N/A	aging
DB00154	DB00154	5280581	PPARA	5280581	CCCCC/C=C\C/C=C\C/C=C\CCCCCCC(=O)O	HOBAELRKJCKHQD-QNEBEIHSSA-N	approved; nutraceutical	0.0804887	Known	Homo sapiens	aging
DB00154	DB00154	5280581	PPARG	5280581	CCCCC/C=C\C/C=C\C/C=C\CCCCCCC(=O)O	HOBAELRKJCKHQD-QNEBEIHSSA-N	approved; nutraceutical	0.0706319	Known	Homo sapiens	aging
DB00154	DB00154	5280581	FABP4	5280581	CCCCC/C=C\C/C=C\C/C=C\CCCCCCC(=O)O	HOBAELRKJCKHQD-QNEBEIHSSA-N	approved; nutraceutical	0.01524	1	homologous analysis	aging
DB00154	DB00154	5280581	FABP5	5280581	CCCCC/C=C\C/C=C\C/C=C\CCCCCCC(=O)O	HOBAELRKJCKHQD-QNEBEIHSSA-N	approved; nutraceutical	0.00937826	2	homologous analysis	aging
DB00154	DB00154	5280581	TLR2	5280581	CCCCC/C=C\C/C=C\C/C=C\CCCCCCC(=O)O	HOBAELRKJCKHQD-QNEBEIHSSA-N	approved; nutraceutical	0.00851286	3	#N/A	aging
DB00154	DB00154	5280581	FFAR4	5280581	CCCCC/C=C\C/C=C\C/C=C\CCCCCCC(=O)O	HOBAELRKJCKHQD-QNEBEIHSSA-N	approved; nutraceutical	0.00756743	4	#N/A	aging
DB00154	DB00154	5280581	FFAR1	5280581	CCCCC/C=C\C/C=C\C/C=C\CCCCCCC(=O)O	HOBAELRKJCKHQD-QNEBEIHSSA-N	approved; nutraceutical	0.00756743	5	#N/A	aging
DB00154	DB00154	5280581	OXER1	5280581	CCCCC/C=C\C/C=C\C/C=C\CCCCCCC(=O)O	HOBAELRKJCKHQD-QNEBEIHSSA-N	approved; nutraceutical	0.0990095	Known	#N/A	aging
DB00154	DB00154	5280581	PPARD	5280581	CCCCC/C=C\C/C=C\C/C=C\CCCCCCC(=O)O	HOBAELRKJCKHQD-QNEBEIHSSA-N	approved; nutraceutical	0.0705471	Known	#N/A	aging
DB01702	DB01702	547	MAPT	547	OC(=O)Cc1ccc(c(c1)O)O	CFFZDZCDUFSOFZ-UHFFFAOYSA-N	experimental	0.00826675	3	Homo sapiens	aging
DB01702	DB01702	547	APEX1	547	OC(=O)Cc1ccc(c(c1)O)O	CFFZDZCDUFSOFZ-UHFFFAOYSA-N	experimental	0.0178624	Known	Homo sapiens	aging
DB01702	DB01702	547	BLM	547	OC(=O)Cc1ccc(c(c1)O)O	CFFZDZCDUFSOFZ-UHFFFAOYSA-N	experimental	0.015041	Known	Homo sapiens	aging
DB01702	DB01702	547	LMNA	547	OC(=O)Cc1ccc(c(c1)O)O	CFFZDZCDUFSOFZ-UHFFFAOYSA-N	experimental	0.0137146	Known	Homo sapiens	aging
DB01702	DB01702	547	NFKB1	547	OC(=O)Cc1ccc(c(c1)O)O	CFFZDZCDUFSOFZ-UHFFFAOYSA-N	experimental	0.0168141	Known	Homo sapiens	aging
DB01702	DB01702	547	POLB	547	OC(=O)Cc1ccc(c(c1)O)O	CFFZDZCDUFSOFZ-UHFFFAOYSA-N	experimental	0.0175693	Known	Homo sapiens	aging
DB01702	DB01702	547	KDM4E	547	OC(=O)Cc1ccc(c(c1)O)O	CFFZDZCDUFSOFZ-UHFFFAOYSA-N	experimental	0.0086893	1	#N/A	aging
DB01702	DB01702	547	TDP1	547	OC(=O)Cc1ccc(c(c1)O)O	CFFZDZCDUFSOFZ-UHFFFAOYSA-N	experimental	0.00853712	2	#N/A	aging
DB01702	DB01702	547	RECQL	547	OC(=O)Cc1ccc(c(c1)O)O	CFFZDZCDUFSOFZ-UHFFFAOYSA-N	experimental	0.00824195	4	#N/A	aging
DB01702	DB01702	547	PSIP1	547	OC(=O)Cc1ccc(c(c1)O)O	CFFZDZCDUFSOFZ-UHFFFAOYSA-N	experimental	0.00707357	5	#N/A	aging
DB01702	DB01702	547	GAA	547	OC(=O)Cc1ccc(c(c1)O)O	CFFZDZCDUFSOFZ-UHFFFAOYSA-N	experimental	0.0168625	Known	#N/A	aging
DB01702	DB01702	547	HSD17B10	547	OC(=O)Cc1ccc(c(c1)O)O	CFFZDZCDUFSOFZ-UHFFFAOYSA-N	experimental	0.0166032	Known	#N/A	aging
DB01702	DB01702	547	THPO	547	OC(=O)Cc1ccc(c(c1)O)O	CFFZDZCDUFSOFZ-UHFFFAOYSA-N	experimental	0.0144465	Known	#N/A	aging
DB01956	DB01956	1123	LMNA	1123	NCCS(=O)(=O)O	XOAAWQZATWQOTB-UHFFFAOYSA-N	experimental	0.0163877	1	Homo sapiens	aging
DB01956	DB01956	1123	APEX1	1123	NCCS(=O)(=O)O	XOAAWQZATWQOTB-UHFFFAOYSA-N	experimental	0.0125332	2	Homo sapiens	aging
DB01956	DB01956	1123	MAPT	1123	NCCS(=O)(=O)O	XOAAWQZATWQOTB-UHFFFAOYSA-N	experimental	0.00879626	5	Homo sapiens	aging
DB01956	DB01956	1123	BLM	1123	NCCS(=O)(=O)O	XOAAWQZATWQOTB-UHFFFAOYSA-N	experimental	0.0683333	Known	Homo sapiens	aging
DB01956	DB01956	1123	RECQL	1123	NCCS(=O)(=O)O	XOAAWQZATWQOTB-UHFFFAOYSA-N	experimental	0.0119825	3	#N/A	aging
DB01956	DB01956	1123	PMP22	1123	NCCS(=O)(=O)O	XOAAWQZATWQOTB-UHFFFAOYSA-N	experimental	0.0101572	4	#N/A	aging
DB02000	DB02000	4775	TP53	4775	OC(=O)CCCc1ccccc1	OBKXEAXTFZPCHS-UHFFFAOYSA-N	experimental	0.0087239	2	Homo sapiens	aging
DB02000	DB02000	4775	MAPT	4775	OC(=O)CCCc1ccccc1	OBKXEAXTFZPCHS-UHFFFAOYSA-N	experimental	0.00730396	3	Homo sapiens	aging
DB02000	DB02000	4775	LMNA	4775	OC(=O)CCCc1ccccc1	OBKXEAXTFZPCHS-UHFFFAOYSA-N	experimental	0.00667466	4	Homo sapiens	aging
DB02000	DB02000	4775	PARP1	4775	OC(=O)CCCc1ccccc1	OBKXEAXTFZPCHS-UHFFFAOYSA-N	experimental	0.00546885	5	Homo sapiens	aging
DB02000	DB02000	4775	SMN1	4775	OC(=O)CCCc1ccccc1	OBKXEAXTFZPCHS-UHFFFAOYSA-N	experimental	0.0639111	Known	#N/A	aging
DB02224	DB02224	439533	APEX1	439533	Oc1cc2O[C@H](c3ccc(c(c3)O)O)[C@H](C(=O)c2c(c1)O)O	CXQWRCVTCMQVQX-LSDHHAIUSA-N	experimental	0.0175456	1	Homo sapiens	aging
DB02224	DB02224	439533	MAPT	439533	Oc1cc2O[C@H](c3ccc(c(c3)O)O)[C@H](C(=O)c2c(c1)O)O	CXQWRCVTCMQVQX-LSDHHAIUSA-N	experimental	0.0100002	4	Homo sapiens	aging
DB02224	DB02224	439533	POLB	439533	Oc1cc2O[C@H](c3ccc(c(c3)O)O)[C@H](C(=O)c2c(c1)O)O	CXQWRCVTCMQVQX-LSDHHAIUSA-N	experimental	0.0441607	Known	Homo sapiens	aging
DB02224	DB02224	439533	PSIP1	439533	Oc1cc2O[C@H](c3ccc(c(c3)O)O)[C@H](C(=O)c2c(c1)O)O	CXQWRCVTCMQVQX-LSDHHAIUSA-N	experimental	0.0153877	2	#N/A	aging
DB02224	DB02224	439533	MCL1	439533	Oc1cc2O[C@H](c3ccc(c(c3)O)O)[C@H](C(=O)c2c(c1)O)O	CXQWRCVTCMQVQX-LSDHHAIUSA-N	experimental	0.0107667	3	#N/A	aging
DB02224	DB02224	439533	L3MBTL1	439533	Oc1cc2O[C@H](c3ccc(c(c3)O)O)[C@H](C(=O)c2c(c1)O)O	CXQWRCVTCMQVQX-LSDHHAIUSA-N	experimental	0.00996961	5	#N/A	aging
DB02224	DB02224	439533	GAA	439533	Oc1cc2O[C@H](c3ccc(c(c3)O)O)[C@H](C(=O)c2c(c1)O)O	CXQWRCVTCMQVQX-LSDHHAIUSA-N	experimental	0.0570996	Known	#N/A	aging
DB03322	DB03322	21138	LMNA	21138	O[C@@H](COc1cccc2c1cccc2)CNC(C)C	AQHHHDLHHXJYJD-CQSZACIVSA-N	experimental	0.00850919	4	Homo sapiens	aging
DB03322	DB03322	21138	HIF1A	21138	O[C@@H](COc1cccc2c1cccc2)CNC(C)C	AQHHHDLHHXJYJD-CQSZACIVSA-N	experimental	0.00844641	5	Homo sapiens	aging
DB03322	DB03322	21138	NFKB1	21138	O[C@@H](COc1cccc2c1cccc2)CNC(C)C	AQHHHDLHHXJYJD-CQSZACIVSA-N	experimental	0.0246828	Known	Homo sapiens	aging
DB03322	DB03322	21138	HSD17B10	21138	O[C@@H](COc1cccc2c1cccc2)CNC(C)C	AQHHHDLHHXJYJD-CQSZACIVSA-N	experimental	0.00865333	3	#N/A	aging
DB03322	DB03322	21138	ALDH1A1	21138	O[C@@H](COc1cccc2c1cccc2)CNC(C)C	AQHHHDLHHXJYJD-CQSZACIVSA-N	experimental	0.0225433	Known	#N/A	aging
DB03322	DB03322	21138	THPO	21138	O[C@@H](COc1cccc2c1cccc2)CNC(C)C	AQHHHDLHHXJYJD-CQSZACIVSA-N	experimental	0.0200249	Known	#N/A	aging
DB03322	DB03322	21138	TSHR	21138	O[C@@H](COc1cccc2c1cccc2)CNC(C)C	AQHHHDLHHXJYJD-CQSZACIVSA-N	experimental	0.0309582	Known	#N/A	aging
DB03754	DB03754	6503	BLM	6503	OCC(CO)(CO)N	LENZDBCJOHFCAS-UHFFFAOYSA-N	approved	0.00715626	2	Homo sapiens	aging
DB03754	DB03754	6503	HTT	6503	OCC(CO)(CO)N	LENZDBCJOHFCAS-UHFFFAOYSA-N	approved	0.00613155	3	Homo sapiens	aging
DB03754	DB03754	6503	MAPT	6503	OCC(CO)(CO)N	LENZDBCJOHFCAS-UHFFFAOYSA-N	approved	0.00555401	5	Homo sapiens	aging
DB03754	DB03754	6503	LMNA	6503	OCC(CO)(CO)N	LENZDBCJOHFCAS-UHFFFAOYSA-N	approved	0.059581	Known	Homo sapiens	aging
DB03754	DB03754	6503	TSHR	6503	OCC(CO)(CO)N	LENZDBCJOHFCAS-UHFFFAOYSA-N	approved	0.00977308	1	#N/A	aging
DB03754	DB03754	6503	ALDH1A1	6503	OCC(CO)(CO)N	LENZDBCJOHFCAS-UHFFFAOYSA-N	approved	0.00560388	4	#N/A	aging
DB04377	DB04377	1662	LMNA	1662	OC(=O)CC(CC(=O)O)(O)C	NPOAOTPXWNWTSH-UHFFFAOYSA-N	experimental	0.000426183	1	Homo sapiens	aging
DB04377	DB04377	1662	PTPN1	1662	OC(=O)CC(CC(=O)O)(O)C	NPOAOTPXWNWTSH-UHFFFAOYSA-N	experimental	0.000328267	3	Homo sapiens	aging
DB04377	DB04377	1662	MAPT	1662	OC(=O)CC(CC(=O)O)(O)C	NPOAOTPXWNWTSH-UHFFFAOYSA-N	experimental	0.000291603	5	Homo sapiens	aging
DB04377	DB04377	1662	TSHR	1662	OC(=O)CC(CC(=O)O)(O)C	NPOAOTPXWNWTSH-UHFFFAOYSA-N	experimental	0.000383078	2	#N/A	aging
DB04377	DB04377	1662	HMGCR	1662	OC(=O)CC(CC(=O)O)(O)C	NPOAOTPXWNWTSH-UHFFFAOYSA-N	experimental	0.19962	Known	#N/A	aging
DB05318	DB05318	1548943	PTGS2	1548943	COc1cc(CNC(=O)CCCC/C=C/C(C)C)ccc1O	YKPUWZUDDOIDPM-SOFGYWHQSA-N	investigational	0.0112164	1	Homo sapiens	aging
DB05318	DB05318	1548943	CNR1	1548943	COc1cc(CNC(=O)CCCC/C=C/C(C)C)ccc1O	YKPUWZUDDOIDPM-SOFGYWHQSA-N	investigational	0.00809313	2	Homo sapiens	aging
DB05318	DB05318	1548943	MAPT	1548943	COc1cc(CNC(=O)CCCC/C=C/C(C)C)ccc1O	YKPUWZUDDOIDPM-SOFGYWHQSA-N	investigational	0.00614359	5	Homo sapiens	aging
DB05318	DB05318	1548943	TRPV1	1548943	COc1cc(CNC(=O)CCCC/C=C/C(C)C)ccc1O	YKPUWZUDDOIDPM-SOFGYWHQSA-N	investigational	0.0373783	Known	Homo sapiens	aging
DB05318	DB05318	1548943	CNR2	1548943	COc1cc(CNC(=O)CCCC/C=C/C(C)C)ccc1O	YKPUWZUDDOIDPM-SOFGYWHQSA-N	investigational	0.0077288	3	#N/A	aging
DB05318	DB05318	1548943	TRPA1	1548943	COc1cc(CNC(=O)CCCC/C=C/C(C)C)ccc1O	YKPUWZUDDOIDPM-SOFGYWHQSA-N	investigational	0.00765574	4	#N/A	aging
DB05318	DB05318	1548943	ALDH1A1	1548943	COc1cc(CNC(=O)CCCC/C=C/C(C)C)ccc1O	YKPUWZUDDOIDPM-SOFGYWHQSA-N	investigational	0.0273437	Known	#N/A	aging
DB05318	DB05318	1548943	PTGS1	1548943	COc1cc(CNC(=O)CCCC/C=C/C(C)C)ccc1O	YKPUWZUDDOIDPM-SOFGYWHQSA-N	investigational	0.0360511	Known	#N/A	aging
DB05494	DB05494	596	TP53	596	OCC1OC(C(C1O)O)n1ccc(nc1=O)N	UHDGCWIWMRVCDJ-UHFFFAOYSA-N	investigational	0.00949612	2	Homo sapiens	aging
DB05494	DB05494	596	LMNA	596	OCC1OC(C(C1O)O)n1ccc(nc1=O)N	UHDGCWIWMRVCDJ-UHFFFAOYSA-N	investigational	0.00636155	3	Homo sapiens	aging
DB05494	DB05494	596	MAPT	596	OCC1OC(C(C1O)O)n1ccc(nc1=O)N	UHDGCWIWMRVCDJ-UHFFFAOYSA-N	investigational	0.0314584	Known	Homo sapiens	aging
DB05494	DB05494	596	ALDH1A1	596	OCC1OC(C(C1O)O)n1ccc(nc1=O)N	UHDGCWIWMRVCDJ-UHFFFAOYSA-N	investigational	0.00615963	4	#N/A	aging
DB05494	DB05494	596	KMT2A	596	OCC1OC(C(C1O)O)n1ccc(nc1=O)N	UHDGCWIWMRVCDJ-UHFFFAOYSA-N	investigational	0.00559788	5	#N/A	aging
DB05494	DB05494	596	SMN1	596	OCC1OC(C(C1O)O)n1ccc(nc1=O)N	UHDGCWIWMRVCDJ-UHFFFAOYSA-N	investigational	0.0344759	Known	#N/A	aging
DB06973	DB06973	6623	ESR1	6623	CC(c1ccc(cc1)O)(c1ccc(cc1)O)C	IISBACLAFKSPIT-UHFFFAOYSA-N	experimental	0.0345315	1	Homo sapiens	aging
DB06973	DB06973	6623	NR3C1	6623	CC(c1ccc(cc1)O)(c1ccc(cc1)O)C	IISBACLAFKSPIT-UHFFFAOYSA-N	experimental	0.0267527	2	Homo sapiens	aging
DB06973	DB06973	6623	AR	6623	CC(c1ccc(cc1)O)(c1ccc(cc1)O)C	IISBACLAFKSPIT-UHFFFAOYSA-N	experimental	0.0512158	Known	Homo sapiens	aging
DB06973	DB06973	6623	ESRRB	6623	CC(c1ccc(cc1)O)(c1ccc(cc1)O)C	IISBACLAFKSPIT-UHFFFAOYSA-N	experimental	0.011617	3	#N/A	aging
DB06973	DB06973	6623	AOX1	6623	CC(c1ccc(cc1)O)(c1ccc(cc1)O)C	IISBACLAFKSPIT-UHFFFAOYSA-N	experimental	0.00948639	4	#N/A	aging
DB06973	DB06973	6623	ESRRA	6623	CC(c1ccc(cc1)O)(c1ccc(cc1)O)C	IISBACLAFKSPIT-UHFFFAOYSA-N	experimental	0.00945028	5	#N/A	aging
DB06973	DB06973	6623	ESR2	6623	CC(c1ccc(cc1)O)(c1ccc(cc1)O)C	IISBACLAFKSPIT-UHFFFAOYSA-N	experimental	0.0562164	Known	#N/A	aging
DB06973	DB06973	6623	ESRRG	6623	CC(c1ccc(cc1)O)(c1ccc(cc1)O)C	IISBACLAFKSPIT-UHFFFAOYSA-N	experimental	0.0563882	Known	#N/A	aging
DB07453	DB07453	11790	CHEK2	11790	O=c1cc(oc2c1ccc1c2cccc1)c1ccccc1	VFMMPHCGEFXGIP-UHFFFAOYSA-N	experimental	0.00838919	2	Homo sapiens	aging
DB07453	DB07453	11790	TP53	11790	O=c1cc(oc2c1ccc1c2cccc1)c1ccccc1	VFMMPHCGEFXGIP-UHFFFAOYSA-N	experimental	0.00680456	4	Homo sapiens	aging
DB07453	DB07453	11790	PRKDC	11790	O=c1cc(oc2c1ccc1c2cccc1)c1ccccc1	VFMMPHCGEFXGIP-UHFFFAOYSA-N	experimental	0.0306134	Known	Homo sapiens	aging
DB07453	DB07453	11790	PDE5	11790	O=c1cc(oc2c1ccc1c2cccc1)c1ccccc1	VFMMPHCGEFXGIP-UHFFFAOYSA-N	experimental	0.0158802	1	#N/A	aging
DB07453	DB07453	11790	CHEK1	11790	O=c1cc(oc2c1ccc1c2cccc1)c1ccccc1	VFMMPHCGEFXGIP-UHFFFAOYSA-N	experimental	0.00650735	5	#N/A	aging
DB07453	DB07453	11790	ABCG2	11790	O=c1cc(oc2c1ccc1c2cccc1)c1ccccc1	VFMMPHCGEFXGIP-UHFFFAOYSA-N	experimental	0.0212154	Known	#N/A	aging
DB07453	DB07453	11790	PDE5A	11790	O=c1cc(oc2c1ccc1c2cccc1)c1ccccc1	VFMMPHCGEFXGIP-UHFFFAOYSA-N	experimental	0.0260933	Known	#N/A	aging
DB07453	DB07453	11790	TBXAS1	11790	O=c1cc(oc2c1ccc1c2cccc1)c1ccccc1	VFMMPHCGEFXGIP-UHFFFAOYSA-N	experimental	0.0281784	Known	#N/A	aging
DB07496	DB07496	7595	MAPT	7595	O=C(Nc1ccccc1)Nc1ccccc1	GWEHVDNNLFDJLR-UHFFFAOYSA-N	experimental	0.00581234	2	Homo sapiens	aging
DB07496	DB07496	7595	LMNA	7595	O=C(Nc1ccccc1)Nc1ccccc1	GWEHVDNNLFDJLR-UHFFFAOYSA-N	experimental	0.00350896	5	Homo sapiens	aging
DB07496	DB07496	7595	TP53	7595	O=C(Nc1ccccc1)Nc1ccccc1	GWEHVDNNLFDJLR-UHFFFAOYSA-N	experimental	0.0375027	Known	Homo sapiens	aging
DB07496	DB07496	7595	TSHR	7595	O=C(Nc1ccccc1)Nc1ccccc1	GWEHVDNNLFDJLR-UHFFFAOYSA-N	experimental	0.004375	3	#N/A	aging
DB07496	DB07496	7595	HPGD	7595	O=C(Nc1ccccc1)Nc1ccccc1	GWEHVDNNLFDJLR-UHFFFAOYSA-N	experimental	0.00401479	4	#N/A	aging
DB07496	DB07496	7595	EPHX1	7595	O=C(Nc1ccccc1)Nc1ccccc1	GWEHVDNNLFDJLR-UHFFFAOYSA-N	experimental	0.11698	Known	#N/A	aging
DB07496	DB07496	7595	EPHX2	7595	O=C(Nc1ccccc1)Nc1ccccc1	GWEHVDNNLFDJLR-UHFFFAOYSA-N	experimental	0.11698	Known	#N/A	aging
DB07496	DB07496	7595	SMN1	7595	O=C(Nc1ccccc1)Nc1ccccc1	GWEHVDNNLFDJLR-UHFFFAOYSA-N	experimental	0.0275387	Known	#N/A	aging
DB07610	DB07610	11318	MAPT	11318	Oc1ccc2c(c1O)cccc2	NXPPAOGUKPJVDI-UHFFFAOYSA-N	experimental	0.0136095	2	Homo sapiens	aging
DB07610	DB07610	11318	MAPK1	11318	Oc1ccc2c(c1O)cccc2	NXPPAOGUKPJVDI-UHFFFAOYSA-N	experimental	0.0229022	1	homologous analysis	aging
DB07610	DB07610	11318	DUSP1	11318	Oc1ccc2c(c1O)cccc2	NXPPAOGUKPJVDI-UHFFFAOYSA-N	experimental	0.00892947	3	#N/A	aging
DB07610	DB07610	11318	KDM4C	11318	Oc1ccc2c(c1O)cccc2	NXPPAOGUKPJVDI-UHFFFAOYSA-N	experimental	0.00892947	4	#N/A	aging
DB07610	DB07610	11318	PTPN7	11318	Oc1ccc2c(c1O)cccc2	NXPPAOGUKPJVDI-UHFFFAOYSA-N	experimental	0.00892947	5	#N/A	aging
DB07610	DB07610	11318	PTPN22	11318	Oc1ccc2c(c1O)cccc2	NXPPAOGUKPJVDI-UHFFFAOYSA-N	experimental	0.34226	Known	#N/A	aging
DB07776	DB07776	10680	NR3C1	10680	O=c1cc(oc2c1cccc2)c1ccccc1	VHBFFQKBGNRLFZ-UHFFFAOYSA-N	experimental	0.00903748	3	Homo sapiens	aging
DB07776	DB07776	10680	AR	10680	O=c1cc(oc2c1cccc2)c1ccccc1	VHBFFQKBGNRLFZ-UHFFFAOYSA-N	experimental	0.0132939	Known	Homo sapiens	aging
DB07776	DB07776	10680	PARP1	10680	O=c1cc(oc2c1cccc2)c1ccccc1	VHBFFQKBGNRLFZ-UHFFFAOYSA-N	experimental	0.0396409	Known	Homo sapiens	aging
DB07776	DB07776	10680	TP53	10680	O=c1cc(oc2c1cccc2)c1ccccc1	VHBFFQKBGNRLFZ-UHFFFAOYSA-N	experimental	0.0123474	Known	Homo sapiens	aging
DB07776	DB07776	10680	CA7	10680	O=c1cc(oc2c1cccc2)c1ccccc1	VHBFFQKBGNRLFZ-UHFFFAOYSA-N	experimental	0.0153464	1	#N/A	aging
DB07776	DB07776	10680	CA14	10680	O=c1cc(oc2c1cccc2)c1ccccc1	VHBFFQKBGNRLFZ-UHFFFAOYSA-N	experimental	0.0118631	2	#N/A	aging
DB07776	DB07776	10680	CA13	10680	O=c1cc(oc2c1cccc2)c1ccccc1	VHBFFQKBGNRLFZ-UHFFFAOYSA-N	experimental	0.00871048	4	#N/A	aging
DB07776	DB07776	10680	CA6	10680	O=c1cc(oc2c1cccc2)c1ccccc1	VHBFFQKBGNRLFZ-UHFFFAOYSA-N	experimental	0.00604849	5	#N/A	aging
DB07776	DB07776	10680	CA1	10680	O=c1cc(oc2c1cccc2)c1ccccc1	VHBFFQKBGNRLFZ-UHFFFAOYSA-N	experimental	0.0207992	Known	#N/A	aging
DB07776	DB07776	10680	CA12	10680	O=c1cc(oc2c1cccc2)c1ccccc1	VHBFFQKBGNRLFZ-UHFFFAOYSA-N	experimental	0.0211405	Known	#N/A	aging
DB07776	DB07776	10680	CA2	10680	O=c1cc(oc2c1cccc2)c1ccccc1	VHBFFQKBGNRLFZ-UHFFFAOYSA-N	experimental	0.0185526	Known	#N/A	aging
DB07776	DB07776	10680	CA9	10680	O=c1cc(oc2c1cccc2)c1ccccc1	VHBFFQKBGNRLFZ-UHFFFAOYSA-N	experimental	0.0211508	Known	#N/A	aging
DB07776	DB07776	10680	HPGD	10680	O=c1cc(oc2c1cccc2)c1ccccc1	VHBFFQKBGNRLFZ-UHFFFAOYSA-N	experimental	0.012814	Known	#N/A	aging
DB07776	DB07776	10680	NPC1	10680	O=c1cc(oc2c1cccc2)c1ccccc1	VHBFFQKBGNRLFZ-UHFFFAOYSA-N	experimental	0.0142249	Known	#N/A	aging
DB07776	DB07776	10680	RAB9A	10680	O=c1cc(oc2c1cccc2)c1ccccc1	VHBFFQKBGNRLFZ-UHFFFAOYSA-N	experimental	0.0143197	Known	#N/A	aging
DB07776	DB07776	10680	TNKS	10680	O=c1cc(oc2c1cccc2)c1ccccc1	VHBFFQKBGNRLFZ-UHFFFAOYSA-N	experimental	0.033613	Known	#N/A	aging
DB07776	DB07776	10680	TNKS2	10680	O=c1cc(oc2c1cccc2)c1ccccc1	VHBFFQKBGNRLFZ-UHFFFAOYSA-N	experimental	0.0278187	Known	#N/A	aging
DB07780	DB07780	445713	LMNA	445713	C/C(=C\COP(=O)(OP(=O)(O)O)O)/CC/C=C(/CCC=C(C)C)\C	VWFJDQUYCIWHTN-YFVJMOTDSA-N	experimental	0.000442746	3	Homo sapiens	aging
DB07780	DB07780	445713	MAPT	445713	C/C(=C\COP(=O)(OP(=O)(O)O)O)/CC/C=C(/CCC=C(C)C)\C	VWFJDQUYCIWHTN-YFVJMOTDSA-N	experimental	0.000426941	5	Homo sapiens	aging
DB07780	DB07780	445713	HSC70A	445713	C/C(=C\COP(=O)(OP(=O)(O)O)O)/CC/C=C(/CCC=C(C)C)\C	VWFJDQUYCIWHTN-YFVJMOTDSA-N	experimental	0.000579385	1	#N/A	aging
DB07780	DB07780	445713	P2RX3	445713	C/C(=C\COP(=O)(OP(=O)(O)O)O)/CC/C=C(/CCC=C(C)C)\C	VWFJDQUYCIWHTN-YFVJMOTDSA-N	experimental	0.000453274	2	#N/A	aging
DB07780	DB07780	445713	FDFT1	445713	C/C(=C\COP(=O)(OP(=O)(O)O)O)/CC/C=C(/CCC=C(C)C)\C	VWFJDQUYCIWHTN-YFVJMOTDSA-N	experimental	0.36447	Known	#N/A	aging
DB07780	DB07780	445713	GGPS1	445713	C/C(=C\COP(=O)(OP(=O)(O)O)O)/CC/C=C(/CCC=C(C)C)\C	VWFJDQUYCIWHTN-YFVJMOTDSA-N	experimental	0.36447	Known	#N/A	aging
DB08036	DB08036	3815	PRKCA	3815	O=C1NCc2c1c1c([nH]c3c1cccc3)c1c2c2ccccc2[nH]1	MEXUTNIFSHFQRG-UHFFFAOYSA-N	experimental	0.00926215	1	Homo sapiens	aging
DB08036	DB08036	3815	CDK1	3815	O=C1NCc2c1c1c([nH]c3c1cccc3)c1c2c2ccccc2[nH]1	MEXUTNIFSHFQRG-UHFFFAOYSA-N	experimental	0.00783321	4	Homo sapiens	aging
DB08036	DB08036	3815	SIRT2	3815	O=C1NCc2c1c1c([nH]c3c1cccc3)c1c2c2ccccc2[nH]1	MEXUTNIFSHFQRG-UHFFFAOYSA-N	experimental	0.00828889	3	homologous analysis	aging
DB08036	DB08036	3815	PRKACA	3815	O=C1NCc2c1c1c([nH]c3c1cccc3)c1c2c2ccccc2[nH]1	MEXUTNIFSHFQRG-UHFFFAOYSA-N	experimental	0.0355399	Known	homologous analysis	aging
DB08036	DB08036	3815	CDK2	3815	O=C1NCc2c1c1c([nH]c3c1cccc3)c1c2c2ccccc2[nH]1	MEXUTNIFSHFQRG-UHFFFAOYSA-N	experimental	0.00849091	2	#N/A	aging
DB08036	DB08036	3815	PRKCB	3815	O=C1NCc2c1c1c([nH]c3c1cccc3)c1c2c2ccccc2[nH]1	MEXUTNIFSHFQRG-UHFFFAOYSA-N	experimental	0.00610673	5	#N/A	aging
DB08036	DB08036	3815	CAMK2D	3815	O=C1NCc2c1c1c([nH]c3c1cccc3)c1c2c2ccccc2[nH]1	MEXUTNIFSHFQRG-UHFFFAOYSA-N	experimental	0.0568999	Known	#N/A	aging
DB08036	DB08036	3815	CDK4	3815	O=C1NCc2c1c1c([nH]c3c1cccc3)c1c2c2ccccc2[nH]1	MEXUTNIFSHFQRG-UHFFFAOYSA-N	experimental	0.0465869	Known	#N/A	aging
DB08036	DB08036	3815	CTRB1	3815	O=C1NCc2c1c1c([nH]c3c1cccc3)c1c2c2ccccc2[nH]1	MEXUTNIFSHFQRG-UHFFFAOYSA-N	experimental	0.0663859	Known	#N/A	aging
DB08036	DB08036	3815	GLI1	3815	O=C1NCc2c1c1c([nH]c3c1cccc3)c1c2c2ccccc2[nH]1	MEXUTNIFSHFQRG-UHFFFAOYSA-N	experimental	0.0763068	Known	#N/A	aging
DB08036	DB08036	3815	GLI2	3815	O=C1NCc2c1c1c([nH]c3c1cccc3)c1c2c2ccccc2[nH]1	MEXUTNIFSHFQRG-UHFFFAOYSA-N	experimental	0.0763068	Known	#N/A	aging
DB08036	DB08036	3815	JAK3	3815	O=C1NCc2c1c1c([nH]c3c1cccc3)c1c2c2ccccc2[nH]1	MEXUTNIFSHFQRG-UHFFFAOYSA-N	experimental	0.0663859	Known	#N/A	aging
DB08036	DB08036	3815	MAP3K11	3815	O=C1NCc2c1c1c([nH]c3c1cccc3)c1c2c2ccccc2[nH]1	MEXUTNIFSHFQRG-UHFFFAOYSA-N	experimental	0.0663859	Known	#N/A	aging
DB08036	DB08036	3815	MAP3K9	3815	O=C1NCc2c1c1c([nH]c3c1cccc3)c1c2c2ccccc2[nH]1	MEXUTNIFSHFQRG-UHFFFAOYSA-N	experimental	0.0663859	Known	#N/A	aging
DB08036	DB08036	3815	mlk-1	3815	O=C1NCc2c1c1c([nH]c3c1cccc3)c1c2c2ccccc2[nH]1	MEXUTNIFSHFQRG-UHFFFAOYSA-N	experimental	0.0663859	Known	#N/A	aging
DB08517	DB08517	73571	MAPT	73571	COc1cc2O[C@@H](CC(=O)c2c(c1)O)c1ccc(cc1)O	DJOJDHGQRNZXQQ-AWEZNQCLSA-N	experimental	0.000512128	3	Homo sapiens	aging
DB08517	DB08517	73571	ESR1	73571	COc1cc2O[C@@H](CC(=O)c2c(c1)O)c1ccc(cc1)O	DJOJDHGQRNZXQQ-AWEZNQCLSA-N	experimental	0.000352266	5	Homo sapiens	aging
DB08517	DB08517	73571	ABCG2	73571	COc1cc2O[C@@H](CC(=O)c2c(c1)O)c1ccc(cc1)O	DJOJDHGQRNZXQQ-AWEZNQCLSA-N	experimental	0.000485278	4	#N/A	aging
DB08517	DB08517	73571	TAS2R31	73571	COc1cc2O[C@@H](CC(=O)c2c(c1)O)c1ccc(cc1)O	DJOJDHGQRNZXQQ-AWEZNQCLSA-N	experimental	0.37559	Known	#N/A	aging
DB04209	Dequadin	2993	NFKB1	2993	Nc1cc(C)[n+](c2c1cccc2)CCCCCCCCCC[n+]1c(C)cc(c2c1cccc2)N	PCSWXVJAIHCTMO-UHFFFAOYSA-P	experimental	0.00679183	2	Homo sapiens	aging
DB04209	Dequadin	2993	TP53	2993	Nc1cc(C)[n+](c2c1cccc2)CCCCCCCCCC[n+]1c(C)cc(c2c1cccc2)N	PCSWXVJAIHCTMO-UHFFFAOYSA-P	experimental	0.00656426	4	Homo sapiens	aging
DB04209	Dequadin	2993	HIF1A	2993	Nc1cc(C)[n+](c2c1cccc2)CCCCCCCCCC[n+]1c(C)cc(c2c1cccc2)N	PCSWXVJAIHCTMO-UHFFFAOYSA-P	experimental	0.0156324	Known	Homo sapiens	aging
DB04209	Dequadin	2993	HTT	2993	Nc1cc(C)[n+](c2c1cccc2)CCCCCCCCCC[n+]1c(C)cc(c2c1cccc2)N	PCSWXVJAIHCTMO-UHFFFAOYSA-P	experimental	0.0195008	Known	Homo sapiens	aging
DB04209	Dequadin	2993	LMNA	2993	Nc1cc(C)[n+](c2c1cccc2)CCCCCCCCCC[n+]1c(C)cc(c2c1cccc2)N	PCSWXVJAIHCTMO-UHFFFAOYSA-P	experimental	0.0159842	Known	Homo sapiens	aging
DB04209	Dequadin	2993	MAPT	2993	Nc1cc(C)[n+](c2c1cccc2)CCCCCCCCCC[n+]1c(C)cc(c2c1cccc2)N	PCSWXVJAIHCTMO-UHFFFAOYSA-P	experimental	0.0133408	Known	Homo sapiens	aging
DB04209	Dequadin	2993	MTOR	2993	Nc1cc(C)[n+](c2c1cccc2)CCCCCCCCCC[n+]1c(C)cc(c2c1cccc2)N	PCSWXVJAIHCTMO-UHFFFAOYSA-P	experimental	0.0175121	Known	Homo sapiens	aging
DB04209	Dequadin	2993	HSD17B10	2993	Nc1cc(C)[n+](c2c1cccc2)CCCCCCCCCC[n+]1c(C)cc(c2c1cccc2)N	PCSWXVJAIHCTMO-UHFFFAOYSA-P	experimental	0.00675495	3	#N/A	aging
DB04209	Dequadin	2993	SMN1	2993	Nc1cc(C)[n+](c2c1cccc2)CCCCCCCCCC[n+]1c(C)cc(c2c1cccc2)N	PCSWXVJAIHCTMO-UHFFFAOYSA-P	experimental	0.00511594	5	#N/A	aging
DB04209	Dequadin	2993	KCNN3	2993	Nc1cc(C)[n+](c2c1cccc2)CCCCCCCCCC[n+]1c(C)cc(c2c1cccc2)N	PCSWXVJAIHCTMO-UHFFFAOYSA-P	experimental	0.0351509	Known	#N/A	aging
DB04209	Dequadin	2993	THPO	2993	Nc1cc(C)[n+](c2c1cccc2)CCCCCCCCCC[n+]1c(C)cc(c2c1cccc2)N	PCSWXVJAIHCTMO-UHFFFAOYSA-P	experimental	0.0178819	Known	#N/A	aging
DB04209	Dequadin	2993	TSHR	2993	Nc1cc(C)[n+](c2c1cccc2)CCCCCCCCCC[n+]1c(C)cc(c2c1cccc2)N	PCSWXVJAIHCTMO-UHFFFAOYSA-P	experimental	0.0201658	Known	#N/A	aging
DB01089	Deserpidine	8550	MAPT	8550	COC(=O)[C@@H]1[C@@H](OC)[C@@H](C[C@H]2[C@@H]1C[C@H]1N(C2)CCc2c1[nH]c1c2cccc1)OC(=O)c1cc(OC)c(c(c1)OC)OC	CVBMAZKKCSYWQR-WCGOZPBSSA-N	approved	0.0136425	1	Homo sapiens	aging
DB01089	Deserpidine	8550	MAPK1	8550	COC(=O)[C@@H]1[C@@H](OC)[C@@H](C[C@H]2[C@@H]1C[C@H]1N(C2)CCc2c1[nH]c1c2cccc1)OC(=O)c1cc(OC)c(c(c1)OC)OC	CVBMAZKKCSYWQR-WCGOZPBSSA-N	approved	0.00658298	3	homologous analysis	aging
DB01089	Deserpidine	8550	GSG2	8550	COC(=O)[C@@H]1[C@@H](OC)[C@@H](C[C@H]2[C@@H]1C[C@H]1N(C2)CCc2c1[nH]c1c2cccc1)OC(=O)c1cc(OC)c(c(c1)OC)OC	CVBMAZKKCSYWQR-WCGOZPBSSA-N	approved	0.00726317	2	#N/A	aging
DB01089	Deserpidine	8550	PIM1	8550	COC(=O)[C@@H]1[C@@H](OC)[C@@H](C[C@H]2[C@@H]1C[C@H]1N(C2)CCc2c1[nH]c1c2cccc1)OC(=O)c1cc(OC)c(c(c1)OC)OC	CVBMAZKKCSYWQR-WCGOZPBSSA-N	approved	0.00649393	4	#N/A	aging
DB01089	Deserpidine	8550	ALOX15	8550	COC(=O)[C@@H]1[C@@H](OC)[C@@H](C[C@H]2[C@@H]1C[C@H]1N(C2)CCc2c1[nH]c1c2cccc1)OC(=O)c1cc(OC)c(c(c1)OC)OC	CVBMAZKKCSYWQR-WCGOZPBSSA-N	approved	0.00649219	5	#N/A	aging
DB01089	Deserpidine	8550	KMT2A	8550	COC(=O)[C@@H]1[C@@H](OC)[C@@H](C[C@H]2[C@@H]1C[C@H]1N(C2)CCc2c1[nH]c1c2cccc1)OC(=O)c1cc(OC)c(c(c1)OC)OC	CVBMAZKKCSYWQR-WCGOZPBSSA-N	approved	0.0718878	Known	#N/A	aging
DB01078	Deslanoside	28620	TP53	28620	OC[C@H]1O[C@@H](O[C@H]2[C@@H](O)C[C@@H](O[C@@H]2C)O[C@H]2[C@@H](O)C[C@@H](O[C@@H]2C)O[C@H]2[C@@H](O)C[C@@H](O[C@@H]2C)O[C@H]2CC[C@]3([C@@H](C2)CC[C@@H]2[C@@H]3C[C@@H](O)[C@]3([C@]2(O)CC[C@@H]3C2=CC(=O)OC2)C)C)[C@@H]([C@H]([C@@H]1O)O)O	OBATZBGFDSVCJD-LALPQLPRSA-N	approved	0.0102956	2	Homo sapiens	aging
DB01078	Deslanoside	28620	MAPT	28620	OC[C@H]1O[C@@H](O[C@H]2[C@@H](O)C[C@@H](O[C@@H]2C)O[C@H]2[C@@H](O)C[C@@H](O[C@@H]2C)O[C@H]2[C@@H](O)C[C@@H](O[C@@H]2C)O[C@H]2CC[C@]3([C@@H](C2)CC[C@@H]2[C@@H]3C[C@@H](O)[C@]3([C@]2(O)CC[C@@H]3C2=CC(=O)OC2)C)C)[C@@H]([C@H]([C@@H]1O)O)O	OBATZBGFDSVCJD-LALPQLPRSA-N	approved	0.0556093	Known	Homo sapiens	aging
DB01078	Deslanoside	28620	KMT2A	28620	OC[C@H]1O[C@@H](O[C@H]2[C@@H](O)C[C@@H](O[C@@H]2C)O[C@H]2[C@@H](O)C[C@@H](O[C@@H]2C)O[C@H]2[C@@H](O)C[C@@H](O[C@@H]2C)O[C@H]2CC[C@]3([C@@H](C2)CC[C@@H]2[C@@H]3C[C@@H](O)[C@]3([C@]2(O)CC[C@@H]3C2=CC(=O)OC2)C)C)[C@@H]([C@H]([C@@H]1O)O)O	OBATZBGFDSVCJD-LALPQLPRSA-N	approved	0.00921791	3	#N/A	aging
DB01078	Deslanoside	28620	ALDH1A1	28620	OC[C@H]1O[C@@H](O[C@H]2[C@@H](O)C[C@@H](O[C@@H]2C)O[C@H]2[C@@H](O)C[C@@H](O[C@@H]2C)O[C@H]2[C@@H](O)C[C@@H](O[C@@H]2C)O[C@H]2CC[C@]3([C@@H](C2)CC[C@@H]2[C@@H]3C[C@@H](O)[C@]3([C@]2(O)CC[C@@H]3C2=CC(=O)OC2)C)C)[C@@H]([C@H]([C@@H]1O)O)O	OBATZBGFDSVCJD-LALPQLPRSA-N	approved	0.00827799	4	#N/A	aging
DB01078	Deslanoside	28620	ALOX15	28620	OC[C@H]1O[C@@H](O[C@H]2[C@@H](O)C[C@@H](O[C@@H]2C)O[C@H]2[C@@H](O)C[C@@H](O[C@@H]2C)O[C@H]2[C@@H](O)C[C@@H](O[C@@H]2C)O[C@H]2CC[C@]3([C@@H](C2)CC[C@@H]2[C@@H]3C[C@@H](O)[C@]3([C@]2(O)CC[C@@H]3C2=CC(=O)OC2)C)C)[C@@H]([C@H]([C@@H]1O)O)O	OBATZBGFDSVCJD-LALPQLPRSA-N	approved	0.00708035	5	#N/A	aging
DB00509	Dextrothyroxine	90657408	MAPT	90657408	OC(=O)[C@@H](Cc1cc(I)c(c(c1)I)Oc1cc(I)c(c(c1)I)O)N	XUIIKFGFIJCVMT-GFCCVEGCSA-N	approved	0.0086661	3	Homo sapiens	aging
DB00509	Dextrothyroxine	90657408	LMNA	90657408	OC(=O)[C@@H](Cc1cc(I)c(c(c1)I)Oc1cc(I)c(c(c1)I)O)N	XUIIKFGFIJCVMT-GFCCVEGCSA-N	approved	0.024113	Known	Homo sapiens	aging
DB00509	Dextrothyroxine	90657408	KDM4E	90657408	OC(=O)[C@@H](Cc1cc(I)c(c(c1)I)Oc1cc(I)c(c(c1)I)O)N	XUIIKFGFIJCVMT-GFCCVEGCSA-N	approved	0.00794919	5	#N/A	aging
DB00509	Dextrothyroxine	90657408	THRB	90657408	OC(=O)[C@@H](Cc1cc(I)c(c(c1)I)Oc1cc(I)c(c(c1)I)O)N	XUIIKFGFIJCVMT-GFCCVEGCSA-N	approved	0.0386159	Known	#N/A	aging
DB08809	Dichloroacetic acid	6597	BLM	6597	ClC(C(=O)O)Cl	JXTHNDFMNIQAHM-UHFFFAOYSA-N	experimental	0.00714402	2	Homo sapiens	aging
DB08809	Dichloroacetic acid	6597	HTT	6597	ClC(C(=O)O)Cl	JXTHNDFMNIQAHM-UHFFFAOYSA-N	experimental	0.00609876	3	Homo sapiens	aging
DB08809	Dichloroacetic acid	6597	MAPT	6597	ClC(C(=O)O)Cl	JXTHNDFMNIQAHM-UHFFFAOYSA-N	experimental	0.00552608	5	Homo sapiens	aging
DB08809	Dichloroacetic acid	6597	LMNA	6597	ClC(C(=O)O)Cl	JXTHNDFMNIQAHM-UHFFFAOYSA-N	experimental	0.0599445	Known	Homo sapiens	aging
DB08809	Dichloroacetic acid	6597	TSHR	6597	ClC(C(=O)O)Cl	JXTHNDFMNIQAHM-UHFFFAOYSA-N	experimental	0.00992655	1	#N/A	aging
DB08809	Dichloroacetic acid	6597	HSD17B10	6597	ClC(C(=O)O)Cl	JXTHNDFMNIQAHM-UHFFFAOYSA-N	experimental	0.00570188	4	#N/A	aging
DB00266	Dicoumarol	54676038	MAPT	54676038	O=c1oc2ccccc2c(c1Cc1c(=O)oc2c(c1O)cccc2)O	DOBMPNYZJYQDGZ-UHFFFAOYSA-N	approved	0.0074621	1	Homo sapiens	aging
DB00266	Dicoumarol	54676038	LMNA	54676038	O=c1oc2ccccc2c(c1Cc1c(=O)oc2c(c1O)cccc2)O	DOBMPNYZJYQDGZ-UHFFFAOYSA-N	approved	0.014042	Known	Homo sapiens	aging
DB00266	Dicoumarol	54676038	TP53	54676038	O=c1oc2ccccc2c(c1Cc1c(=O)oc2c(c1O)cccc2)O	DOBMPNYZJYQDGZ-UHFFFAOYSA-N	approved	0.0218445	Known	Homo sapiens	aging
DB00266	Dicoumarol	54676038	HSD17B10	54676038	O=c1oc2ccccc2c(c1Cc1c(=O)oc2c(c1O)cccc2)O	DOBMPNYZJYQDGZ-UHFFFAOYSA-N	approved	0.00532196	3	#N/A	aging
DB00266	Dicoumarol	54676038	TGM2	54676038	O=c1oc2ccccc2c(c1Cc1c(=O)oc2c(c1O)cccc2)O	DOBMPNYZJYQDGZ-UHFFFAOYSA-N	approved	0.00507403	4	#N/A	aging
DB00266	Dicoumarol	54676038	AOX1	54676038	O=c1oc2ccccc2c(c1Cc1c(=O)oc2c(c1O)cccc2)O	DOBMPNYZJYQDGZ-UHFFFAOYSA-N	approved	0.00499513	5	#N/A	aging
DB00266	Dicoumarol	54676038	ALDH1A1	54676038	O=c1oc2ccccc2c(c1Cc1c(=O)oc2c(c1O)cccc2)O	DOBMPNYZJYQDGZ-UHFFFAOYSA-N	approved	0.0191124	Known	#N/A	aging
DB00266	Dicoumarol	54676038	GPR35	54676038	O=c1oc2ccccc2c(c1Cc1c(=O)oc2c(c1O)cccc2)O	DOBMPNYZJYQDGZ-UHFFFAOYSA-N	approved	0.0270583	Known	#N/A	aging
DB00266	Dicoumarol	54676038	NQO1	54676038	O=c1oc2ccccc2c(c1Cc1c(=O)oc2c(c1O)cccc2)O	DOBMPNYZJYQDGZ-UHFFFAOYSA-N	approved	0.0477716	Known	#N/A	aging
DB00266	Dicoumarol	54676038	PCSK7	54676038	O=c1oc2ccccc2c(c1Cc1c(=O)oc2c(c1O)cccc2)O	DOBMPNYZJYQDGZ-UHFFFAOYSA-N	approved	0.0592599	Known	#N/A	aging
DB01396	Digitoxin	441207	NFE2L2	441207	O=C1OCC(=C1)[C@H]1CC[C@]2([C@]1(C)CC[C@H]1[C@H]2CC[C@H]2[C@]1(C)CC[C@@H](C2)O[C@H]1C[C@H](O)[C@@H]([C@H](O1)C)O[C@H]1C[C@H](O)[C@@H]([C@H](O1)C)O[C@H]1C[C@H](O)[C@@H]([C@H](O1)C)O)O	WDJUZGPOPHTGOT-XUDUSOBPSA-N	approved	0.0144393	1	Homo sapiens	aging
DB01396	Digitoxin	441207	NFKB1	441207	O=C1OCC(=C1)[C@H]1CC[C@]2([C@]1(C)CC[C@H]1[C@H]2CC[C@H]2[C@]1(C)CC[C@@H](C2)O[C@H]1C[C@H](O)[C@@H]([C@H](O1)C)O[C@H]1C[C@H](O)[C@@H]([C@H](O1)C)O[C@H]1C[C@H](O)[C@@H]([C@H](O1)C)O)O	WDJUZGPOPHTGOT-XUDUSOBPSA-N	approved	0.00580302	4	Homo sapiens	aging
DB01396	Digitoxin	441207	LMNA	441207	O=C1OCC(=C1)[C@H]1CC[C@]2([C@]1(C)CC[C@H]1[C@H]2CC[C@H]2[C@]1(C)CC[C@@H](C2)O[C@H]1C[C@H](O)[C@@H]([C@H](O1)C)O[C@H]1C[C@H](O)[C@@H]([C@H](O1)C)O[C@H]1C[C@H](O)[C@@H]([C@H](O1)C)O)O	WDJUZGPOPHTGOT-XUDUSOBPSA-N	approved	0.0161225	Known	Homo sapiens	aging
DB01396	Digitoxin	441207	MAPT	441207	O=C1OCC(=C1)[C@H]1CC[C@]2([C@]1(C)CC[C@H]1[C@H]2CC[C@H]2[C@]1(C)CC[C@@H](C2)O[C@H]1C[C@H](O)[C@@H]([C@H](O1)C)O[C@H]1C[C@H](O)[C@@H]([C@H](O1)C)O[C@H]1C[C@H](O)[C@@H]([C@H](O1)C)O)O	WDJUZGPOPHTGOT-XUDUSOBPSA-N	approved	0.0178022	Known	Homo sapiens	aging
DB01396	Digitoxin	441207	STAT3	441207	O=C1OCC(=C1)[C@H]1CC[C@]2([C@]1(C)CC[C@H]1[C@H]2CC[C@H]2[C@]1(C)CC[C@@H](C2)O[C@H]1C[C@H](O)[C@@H]([C@H](O1)C)O[C@H]1C[C@H](O)[C@@H]([C@H](O1)C)O[C@H]1C[C@H](O)[C@@H]([C@H](O1)C)O)O	WDJUZGPOPHTGOT-XUDUSOBPSA-N	approved	0.0302935	Known	Homo sapiens	aging
DB01396	Digitoxin	441207	TP53	441207	O=C1OCC(=C1)[C@H]1CC[C@]2([C@]1(C)CC[C@H]1[C@H]2CC[C@H]2[C@]1(C)CC[C@@H](C2)O[C@H]1C[C@H](O)[C@@H]([C@H](O1)C)O[C@H]1C[C@H](O)[C@@H]([C@H](O1)C)O[C@H]1C[C@H](O)[C@@H]([C@H](O1)C)O)O	WDJUZGPOPHTGOT-XUDUSOBPSA-N	approved	0.0238556	Known	Homo sapiens	aging
DB01396	Digitoxin	441207	RORC	441207	O=C1OCC(=C1)[C@H]1CC[C@]2([C@]1(C)CC[C@H]1[C@H]2CC[C@H]2[C@]1(C)CC[C@@H](C2)O[C@H]1C[C@H](O)[C@@H]([C@H](O1)C)O[C@H]1C[C@H](O)[C@@H]([C@H](O1)C)O[C@H]1C[C@H](O)[C@@H]([C@H](O1)C)O)O	WDJUZGPOPHTGOT-XUDUSOBPSA-N	approved	0.00755561	2	#N/A	aging
DB01396	Digitoxin	441207	HSD11B1	441207	O=C1OCC(=C1)[C@H]1CC[C@]2([C@]1(C)CC[C@H]1[C@H]2CC[C@H]2[C@]1(C)CC[C@@H](C2)O[C@H]1C[C@H](O)[C@@H]([C@H](O1)C)O[C@H]1C[C@H](O)[C@@H]([C@H](O1)C)O[C@H]1C[C@H](O)[C@@H]([C@H](O1)C)O)O	WDJUZGPOPHTGOT-XUDUSOBPSA-N	approved	0.00589197	3	#N/A	aging
DB01396	Digitoxin	441207	NPC1	441207	O=C1OCC(=C1)[C@H]1CC[C@]2([C@]1(C)CC[C@H]1[C@H]2CC[C@H]2[C@]1(C)CC[C@@H](C2)O[C@H]1C[C@H](O)[C@@H]([C@H](O1)C)O[C@H]1C[C@H](O)[C@@H]([C@H](O1)C)O[C@H]1C[C@H](O)[C@@H]([C@H](O1)C)O)O	WDJUZGPOPHTGOT-XUDUSOBPSA-N	approved	0.0270751	Known	#N/A	aging
DB01396	Digitoxin	441207	RAB9A	441207	O=C1OCC(=C1)[C@H]1CC[C@]2([C@]1(C)CC[C@H]1[C@H]2CC[C@H]2[C@]1(C)CC[C@@H](C2)O[C@H]1C[C@H](O)[C@@H]([C@H](O1)C)O[C@H]1C[C@H](O)[C@@H]([C@H](O1)C)O[C@H]1C[C@H](O)[C@@H]([C@H](O1)C)O)O	WDJUZGPOPHTGOT-XUDUSOBPSA-N	approved	0.0279446	Known	#N/A	aging
DB00390	Digoxin	2724385	NFE2L2	2724385	O=C1OCC(=C1)C1CC[C@]2([C@]1(C)[C@H](O)C[C@H]1[C@H]2CC[C@H]2[C@]1(C)CC[C@@H](C2)O[C@H]1C[C@H](O)[C@@H]([C@H](O1)C)O[C@H]1C[C@H](O)[C@@H]([C@H](O1)C)O[C@H]1C[C@H](O)[C@@H]([C@H](O1)C)O)O	LTMHDMANZUZIPE-PUGKRICDSA-N	approved	0.0108065	2	Homo sapiens	aging
DB00390	Digoxin	2724385	MAPT	2724385	O=C1OCC(=C1)C1CC[C@]2([C@]1(C)[C@H](O)C[C@H]1[C@H]2CC[C@H]2[C@]1(C)CC[C@@H](C2)O[C@H]1C[C@H](O)[C@@H]([C@H](O1)C)O[C@H]1C[C@H](O)[C@@H]([C@H](O1)C)O[C@H]1C[C@H](O)[C@@H]([C@H](O1)C)O)O	LTMHDMANZUZIPE-PUGKRICDSA-N	approved	0.00851441	4	Homo sapiens	aging
DB00390	Digoxin	2724385	LMNA	2724385	O=C1OCC(=C1)C1CC[C@]2([C@]1(C)[C@H](O)C[C@H]1[C@H]2CC[C@H]2[C@]1(C)CC[C@@H](C2)O[C@H]1C[C@H](O)[C@@H]([C@H](O1)C)O[C@H]1C[C@H](O)[C@@H]([C@H](O1)C)O[C@H]1C[C@H](O)[C@@H]([C@H](O1)C)O)O	LTMHDMANZUZIPE-PUGKRICDSA-N	approved	0.0137059	Known	Homo sapiens	aging
DB00390	Digoxin	2724385	STAT3	2724385	O=C1OCC(=C1)C1CC[C@]2([C@]1(C)[C@H](O)C[C@H]1[C@H]2CC[C@H]2[C@]1(C)CC[C@@H](C2)O[C@H]1C[C@H](O)[C@@H]([C@H](O1)C)O[C@H]1C[C@H](O)[C@@H]([C@H](O1)C)O[C@H]1C[C@H](O)[C@@H]([C@H](O1)C)O)O	LTMHDMANZUZIPE-PUGKRICDSA-N	approved	0.0315523	Known	Homo sapiens	aging
DB00390	Digoxin	2724385	TP53	2724385	O=C1OCC(=C1)C1CC[C@]2([C@]1(C)[C@H](O)C[C@H]1[C@H]2CC[C@H]2[C@]1(C)CC[C@@H](C2)O[C@H]1C[C@H](O)[C@@H]([C@H](O1)C)O[C@H]1C[C@H](O)[C@@H]([C@H](O1)C)O[C@H]1C[C@H](O)[C@@H]([C@H](O1)C)O)O	LTMHDMANZUZIPE-PUGKRICDSA-N	approved	0.0187322	Known	Homo sapiens	aging
DB00390	Digoxin	2724385	ACP1	2724385	O=C1OCC(=C1)C1CC[C@]2([C@]1(C)[C@H](O)C[C@H]1[C@H]2CC[C@H]2[C@]1(C)CC[C@@H](C2)O[C@H]1C[C@H](O)[C@@H]([C@H](O1)C)O[C@H]1C[C@H](O)[C@@H]([C@H](O1)C)O[C@H]1C[C@H](O)[C@@H]([C@H](O1)C)O)O	LTMHDMANZUZIPE-PUGKRICDSA-N	approved	0.010849	1	#N/A	aging
DB00390	Digoxin	2724385	SLCO1B3	2724385	O=C1OCC(=C1)C1CC[C@]2([C@]1(C)[C@H](O)C[C@H]1[C@H]2CC[C@H]2[C@]1(C)CC[C@@H](C2)O[C@H]1C[C@H](O)[C@@H]([C@H](O1)C)O[C@H]1C[C@H](O)[C@@H]([C@H](O1)C)O[C@H]1C[C@H](O)[C@@H]([C@H](O1)C)O)O	LTMHDMANZUZIPE-PUGKRICDSA-N	approved	0.0105865	3	#N/A	aging
DB00390	Digoxin	2724385	PTPRF	2724385	O=C1OCC(=C1)C1CC[C@]2([C@]1(C)[C@H](O)C[C@H]1[C@H]2CC[C@H]2[C@]1(C)CC[C@@H](C2)O[C@H]1C[C@H](O)[C@@H]([C@H](O1)C)O[C@H]1C[C@H](O)[C@@H]([C@H](O1)C)O[C@H]1C[C@H](O)[C@@H]([C@H](O1)C)O)O	LTMHDMANZUZIPE-PUGKRICDSA-N	approved	0.00769285	5	#N/A	aging
DB00390	Digoxin	2724385	NPC1	2724385	O=C1OCC(=C1)C1CC[C@]2([C@]1(C)[C@H](O)C[C@H]1[C@H]2CC[C@H]2[C@]1(C)CC[C@@H](C2)O[C@H]1C[C@H](O)[C@@H]([C@H](O1)C)O[C@H]1C[C@H](O)[C@@H]([C@H](O1)C)O[C@H]1C[C@H](O)[C@@H]([C@H](O1)C)O)O	LTMHDMANZUZIPE-PUGKRICDSA-N	approved	0.0224702	Known	#N/A	aging
DB00390	Digoxin	2724385	RAB9A	2724385	O=C1OCC(=C1)C1CC[C@]2([C@]1(C)[C@H](O)C[C@H]1[C@H]2CC[C@H]2[C@]1(C)CC[C@@H](C2)O[C@H]1C[C@H](O)[C@@H]([C@H](O1)C)O[C@H]1C[C@H](O)[C@@H]([C@H](O1)C)O[C@H]1C[C@H](O)[C@@H]([C@H](O1)C)O)O	LTMHDMANZUZIPE-PUGKRICDSA-N	approved	0.0227975	Known	#N/A	aging
DB00390	Digoxin	2724385	RECQL	2724385	O=C1OCC(=C1)C1CC[C@]2([C@]1(C)[C@H](O)C[C@H]1[C@H]2CC[C@H]2[C@]1(C)CC[C@@H](C2)O[C@H]1C[C@H](O)[C@@H]([C@H](O1)C)O[C@H]1C[C@H](O)[C@@H]([C@H](O1)C)O[C@H]1C[C@H](O)[C@@H]([C@H](O1)C)O)O	LTMHDMANZUZIPE-PUGKRICDSA-N	approved	0.0138189	Known	#N/A	aging
DB00390	Digoxin	2724385	RORC	2724385	O=C1OCC(=C1)C1CC[C@]2([C@]1(C)[C@H](O)C[C@H]1[C@H]2CC[C@H]2[C@]1(C)CC[C@@H](C2)O[C@H]1C[C@H](O)[C@@H]([C@H](O1)C)O[C@H]1C[C@H](O)[C@@H]([C@H](O1)C)O[C@H]1C[C@H](O)[C@@H]([C@H](O1)C)O)O	LTMHDMANZUZIPE-PUGKRICDSA-N	approved	0.0259957	Known	#N/A	aging
DB00390	Digoxin	2724385	SLCO1B1	2724385	O=C1OCC(=C1)C1CC[C@]2([C@]1(C)[C@H](O)C[C@H]1[C@H]2CC[C@H]2[C@]1(C)CC[C@@H](C2)O[C@H]1C[C@H](O)[C@@H]([C@H](O1)C)O[C@H]1C[C@H](O)[C@@H]([C@H](O1)C)O[C@H]1C[C@H](O)[C@@H]([C@H](O1)C)O)O	LTMHDMANZUZIPE-PUGKRICDSA-N	approved	0.0155628	Known	#N/A	aging
DB01844	Dimethylformamide	6228	LMNA	6228	O=CN(C)C	ZMXDDKWLCZADIW-UHFFFAOYSA-N	experimental	0.0105654	1	Homo sapiens	aging
DB01844	Dimethylformamide	6228	TP53	6228	O=CN(C)C	ZMXDDKWLCZADIW-UHFFFAOYSA-N	experimental	0.00779919	2	Homo sapiens	aging
DB01844	Dimethylformamide	6228	NFKB1	6228	O=CN(C)C	ZMXDDKWLCZADIW-UHFFFAOYSA-N	experimental	0.00528123	5	Homo sapiens	aging
DB01844	Dimethylformamide	6228	LTA4H	6228	O=CN(C)C	ZMXDDKWLCZADIW-UHFFFAOYSA-N	experimental	0.00677298	3	#N/A	aging
DB01844	Dimethylformamide	6228	TBXAS1	6228	O=CN(C)C	ZMXDDKWLCZADIW-UHFFFAOYSA-N	experimental	0.00588973	4	#N/A	aging
DB01844	Dimethylformamide	6228	TSHR	6228	O=CN(C)C	ZMXDDKWLCZADIW-UHFFFAOYSA-N	experimental	0.118689	Known	#N/A	aging
DB00822	Disulfiram	3117	TP53	3117	CCN(C(=S)SSC(=S)N(CC)CC)CC	AUZONCFQVSMFAP-UHFFFAOYSA-N	approved	0.00513199	2	Homo sapiens	aging
DB00822	Disulfiram	3117	AGTR1	3117	CCN(C(=S)SSC(=S)N(CC)CC)CC	AUZONCFQVSMFAP-UHFFFAOYSA-N	approved	0.0187831	Known	Homo sapiens	aging
DB00822	Disulfiram	3117	HTT	3117	CCN(C(=S)SSC(=S)N(CC)CC)CC	AUZONCFQVSMFAP-UHFFFAOYSA-N	approved	0.010882	Known	Homo sapiens	aging
DB00822	Disulfiram	3117	LMNA	3117	CCN(C(=S)SSC(=S)N(CC)CC)CC	AUZONCFQVSMFAP-UHFFFAOYSA-N	approved	0.0103494	Known	Homo sapiens	aging
DB00822	Disulfiram	3117	MAPT	3117	CCN(C(=S)SSC(=S)N(CC)CC)CC	AUZONCFQVSMFAP-UHFFFAOYSA-N	approved	0.00980867	Known	Homo sapiens	aging
DB00822	Disulfiram	3117	MTOR	3117	CCN(C(=S)SSC(=S)N(CC)CC)CC	AUZONCFQVSMFAP-UHFFFAOYSA-N	approved	0.0101019	Known	Homo sapiens	aging
DB00822	Disulfiram	3117	NFKB1	3117	CCN(C(=S)SSC(=S)N(CC)CC)CC	AUZONCFQVSMFAP-UHFFFAOYSA-N	approved	0.0100636	Known	Homo sapiens	aging
DB00822	Disulfiram	3117	ACE	3117	CCN(C(=S)SSC(=S)N(CC)CC)CC	AUZONCFQVSMFAP-UHFFFAOYSA-N	approved	0.00517175	1	#N/A	aging
DB00822	Disulfiram	3117	TSHR	3117	CCN(C(=S)SSC(=S)N(CC)CC)CC	AUZONCFQVSMFAP-UHFFFAOYSA-N	approved	0.00432438	4	#N/A	aging
DB00822	Disulfiram	3117	RECQL	3117	CCN(C(=S)SSC(=S)N(CC)CC)CC	AUZONCFQVSMFAP-UHFFFAOYSA-N	approved	0.00425638	5	#N/A	aging
DB00822	Disulfiram	3117	ALDH1A1	3117	CCN(C(=S)SSC(=S)N(CC)CC)CC	AUZONCFQVSMFAP-UHFFFAOYSA-N	approved	0.0121827	Known	#N/A	aging
DB00822	Disulfiram	3117	ALOX12	3117	CCN(C(=S)SSC(=S)N(CC)CC)CC	AUZONCFQVSMFAP-UHFFFAOYSA-N	approved	0.0118167	Known	#N/A	aging
DB00822	Disulfiram	3117	ALOX15	3117	CCN(C(=S)SSC(=S)N(CC)CC)CC	AUZONCFQVSMFAP-UHFFFAOYSA-N	approved	0.0115254	Known	#N/A	aging
DB00822	Disulfiram	3117	APLNR	3117	CCN(C(=S)SSC(=S)N(CC)CC)CC	AUZONCFQVSMFAP-UHFFFAOYSA-N	approved	0.0213915	Known	#N/A	aging
DB00822	Disulfiram	3117	HPGD	3117	CCN(C(=S)SSC(=S)N(CC)CC)CC	AUZONCFQVSMFAP-UHFFFAOYSA-N	approved	0.0112591	Known	#N/A	aging
DB00822	Disulfiram	3117	HSD17B10	3117	CCN(C(=S)SSC(=S)N(CC)CC)CC	AUZONCFQVSMFAP-UHFFFAOYSA-N	approved	0.0108489	Known	#N/A	aging
DB00822	Disulfiram	3117	MGLL	3117	CCN(C(=S)SSC(=S)N(CC)CC)CC	AUZONCFQVSMFAP-UHFFFAOYSA-N	approved	0.0213915	Known	#N/A	aging
DB00822	Disulfiram	3117	NPSR1	3117	CCN(C(=S)SSC(=S)N(CC)CC)CC	AUZONCFQVSMFAP-UHFFFAOYSA-N	approved	0.0101269	Known	#N/A	aging
DB00822	Disulfiram	3117	PLIN1	3117	CCN(C(=S)SSC(=S)N(CC)CC)CC	AUZONCFQVSMFAP-UHFFFAOYSA-N	approved	0.0207544	Known	#N/A	aging
DB00822	Disulfiram	3117	PLIN5	3117	CCN(C(=S)SSC(=S)N(CC)CC)CC	AUZONCFQVSMFAP-UHFFFAOYSA-N	approved	0.0222087	Known	#N/A	aging
DB00822	Disulfiram	3117	PTBP1	3117	CCN(C(=S)SSC(=S)N(CC)CC)CC	AUZONCFQVSMFAP-UHFFFAOYSA-N	approved	0.0213915	Known	#N/A	aging
DB00822	Disulfiram	3117	THPO	3117	CCN(C(=S)SSC(=S)N(CC)CC)CC	AUZONCFQVSMFAP-UHFFFAOYSA-N	approved	0.0106415	Known	#N/A	aging
DB00822	Disulfiram	3117	TRPA1	3117	CCN(C(=S)SSC(=S)N(CC)CC)CC	AUZONCFQVSMFAP-UHFFFAOYSA-N	approved	0.0167914	Known	#N/A	aging
DB01638	D-Sorbitol	453|5780	BLM	453|5780	OCC(C(C(C(CO)O)O)O)O	FBPFZTCFMRRESA-JGWLITMVSA-N|FBPFZTCFMRRESA-UHFFFAOYSA-N	approved	0.00708159	2	Homo sapiens	aging
DB01638	D-Sorbitol	453|5780	HTT	453|5780	OCC(C(C(C(CO)O)O)O)O	FBPFZTCFMRRESA-JGWLITMVSA-N|FBPFZTCFMRRESA-UHFFFAOYSA-N	approved	0.00613439	3	Homo sapiens	aging
DB01638	D-Sorbitol	453|5780	MAPT	453|5780	OCC(C(C(C(CO)O)O)O)O	FBPFZTCFMRRESA-JGWLITMVSA-N|FBPFZTCFMRRESA-UHFFFAOYSA-N	approved	0.00553015	4	Homo sapiens	aging
DB01638	D-Sorbitol	453|5780	LMNA	453|5780	OCC(C(C(C(CO)O)O)O)O	FBPFZTCFMRRESA-JGWLITMVSA-N|FBPFZTCFMRRESA-UHFFFAOYSA-N	approved	0.0594064	Known	Homo sapiens	aging
DB01638	D-Sorbitol	453|5780	TSHR	453|5780	OCC(C(C(C(CO)O)O)O)O	FBPFZTCFMRRESA-JGWLITMVSA-N|FBPFZTCFMRRESA-UHFFFAOYSA-N	approved	0.00967725	1	#N/A	aging
DB01638	D-Sorbitol	453|5780	HSD17B10	453|5780	OCC(C(C(C(CO)O)O)O)O	FBPFZTCFMRRESA-JGWLITMVSA-N|FBPFZTCFMRRESA-UHFFFAOYSA-N	approved	0.00549483	5	#N/A	aging
DB08468	Ellagic acid	5281855	PDGFRA	5281855	Oc1cc2c(=O)oc3c4c2c(c1O)oc(=O)c4cc(c3O)O	AFSDNFLWKVMVRB-UHFFFAOYSA-N	experimental	0.00385747	5	Homo sapiens	aging
DB08468	Ellagic acid	5281855	AKT1	5281855	Oc1cc2c(=O)oc3c4c2c(c1O)oc(=O)c4cc(c3O)O	AFSDNFLWKVMVRB-UHFFFAOYSA-N	experimental	0.00863879	Known	Homo sapiens	aging
DB08468	Ellagic acid	5281855	APEX1	5281855	Oc1cc2c(=O)oc3c4c2c(c1O)oc(=O)c4cc(c3O)O	AFSDNFLWKVMVRB-UHFFFAOYSA-N	experimental	0.00507574	Known	Homo sapiens	aging
DB08468	Ellagic acid	5281855	BLM	5281855	Oc1cc2c(=O)oc3c4c2c(c1O)oc(=O)c4cc(c3O)O	AFSDNFLWKVMVRB-UHFFFAOYSA-N	experimental	0.00367726	Known	Homo sapiens	aging
DB08468	Ellagic acid	5281855	EGFR	5281855	Oc1cc2c(=O)oc3c4c2c(c1O)oc(=O)c4cc(c3O)O	AFSDNFLWKVMVRB-UHFFFAOYSA-N	experimental	0.00937691	Known	Homo sapiens	aging
DB08468	Ellagic acid	5281855	ERBB2	5281855	Oc1cc2c(=O)oc3c4c2c(c1O)oc(=O)c4cc(c3O)O	AFSDNFLWKVMVRB-UHFFFAOYSA-N	experimental	0.0101077	Known	Homo sapiens	aging
DB08468	Ellagic acid	5281855	GSK3B	5281855	Oc1cc2c(=O)oc3c4c2c(c1O)oc(=O)c4cc(c3O)O	AFSDNFLWKVMVRB-UHFFFAOYSA-N	experimental	0.00524563	Known	Homo sapiens	aging
DB08468	Ellagic acid	5281855	HSPA1A	5281855	Oc1cc2c(=O)oc3c4c2c(c1O)oc(=O)c4cc(c3O)O	AFSDNFLWKVMVRB-UHFFFAOYSA-N	experimental	0.00622763	Known	Homo sapiens	aging
DB08468	Ellagic acid	5281855	IGF1R	5281855	Oc1cc2c(=O)oc3c4c2c(c1O)oc(=O)c4cc(c3O)O	AFSDNFLWKVMVRB-UHFFFAOYSA-N	experimental	0.00986017	Known	Homo sapiens	aging
DB08468	Ellagic acid	5281855	INSR	5281855	Oc1cc2c(=O)oc3c4c2c(c1O)oc(=O)c4cc(c3O)O	AFSDNFLWKVMVRB-UHFFFAOYSA-N	experimental	0.00895206	Known	Homo sapiens	aging
DB08468	Ellagic acid	5281855	IRS1	5281855	Oc1cc2c(=O)oc3c4c2c(c1O)oc(=O)c4cc(c3O)O	AFSDNFLWKVMVRB-UHFFFAOYSA-N	experimental	0.00512544	Known	Homo sapiens	aging
DB08468	Ellagic acid	5281855	LMNA	5281855	Oc1cc2c(=O)oc3c4c2c(c1O)oc(=O)c4cc(c3O)O	AFSDNFLWKVMVRB-UHFFFAOYSA-N	experimental	0.0034035	Known	Homo sapiens	aging
DB08468	Ellagic acid	5281855	PDGFRB	5281855	Oc1cc2c(=O)oc3c4c2c(c1O)oc(=O)c4cc(c3O)O	AFSDNFLWKVMVRB-UHFFFAOYSA-N	experimental	0.00898604	Known	Homo sapiens	aging
DB08468	Ellagic acid	5281855	POLB	5281855	Oc1cc2c(=O)oc3c4c2c(c1O)oc(=O)c4cc(c3O)O	AFSDNFLWKVMVRB-UHFFFAOYSA-N	experimental	0.00436029	Known	Homo sapiens	aging
DB08468	Ellagic acid	5281855	PTK2	5281855	Oc1cc2c(=O)oc3c4c2c(c1O)oc(=O)c4cc(c3O)O	AFSDNFLWKVMVRB-UHFFFAOYSA-N	experimental	0.00907231	Known	Homo sapiens	aging
DB08468	Ellagic acid	5281855	FLT3	5281855	Oc1cc2c(=O)oc3c4c2c(c1O)oc(=O)c4cc(c3O)O	AFSDNFLWKVMVRB-UHFFFAOYSA-N	experimental	0.00546283	1	#N/A	aging
DB08468	Ellagic acid	5281855	ALK	5281855	Oc1cc2c(=O)oc3c4c2c(c1O)oc(=O)c4cc(c3O)O	AFSDNFLWKVMVRB-UHFFFAOYSA-N	experimental	0.00532484	2	#N/A	aging
DB08468	Ellagic acid	5281855	CA5B	5281855	Oc1cc2c(=O)oc3c4c2c(c1O)oc(=O)c4cc(c3O)O	AFSDNFLWKVMVRB-UHFFFAOYSA-N	experimental	0.0047372	3	#N/A	aging
DB08468	Ellagic acid	5281855	AXL	5281855	Oc1cc2c(=O)oc3c4c2c(c1O)oc(=O)c4cc(c3O)O	AFSDNFLWKVMVRB-UHFFFAOYSA-N	experimental	0.00439821	4	#N/A	aging
DB08468	Ellagic acid	5281855	AKR1B1	5281855	Oc1cc2c(=O)oc3c4c2c(c1O)oc(=O)c4cc(c3O)O	AFSDNFLWKVMVRB-UHFFFAOYSA-N	experimental	0.00396294	Known	#N/A	aging
DB08468	Ellagic acid	5281855	ALOX15	5281855	Oc1cc2c(=O)oc3c4c2c(c1O)oc(=O)c4cc(c3O)O	AFSDNFLWKVMVRB-UHFFFAOYSA-N	experimental	0.00578219	Known	#N/A	aging
DB08468	Ellagic acid	5281855	AURKA	5281855	Oc1cc2c(=O)oc3c4c2c(c1O)oc(=O)c4cc(c3O)O	AFSDNFLWKVMVRB-UHFFFAOYSA-N	experimental	0.00994924	Known	#N/A	aging
DB08468	Ellagic acid	5281855	AURKB	5281855	Oc1cc2c(=O)oc3c4c2c(c1O)oc(=O)c4cc(c3O)O	AFSDNFLWKVMVRB-UHFFFAOYSA-N	experimental	0.0113166	Known	#N/A	aging
DB08468	Ellagic acid	5281855	BACE1	5281855	Oc1cc2c(=O)oc3c4c2c(c1O)oc(=O)c4cc(c3O)O	AFSDNFLWKVMVRB-UHFFFAOYSA-N	experimental	0.00526928	Known	#N/A	aging
DB08468	Ellagic acid	5281855	BRAF	5281855	Oc1cc2c(=O)oc3c4c2c(c1O)oc(=O)c4cc(c3O)O	AFSDNFLWKVMVRB-UHFFFAOYSA-N	experimental	0.00622763	Known	#N/A	aging
DB08468	Ellagic acid	5281855	CA1	5281855	Oc1cc2c(=O)oc3c4c2c(c1O)oc(=O)c4cc(c3O)O	AFSDNFLWKVMVRB-UHFFFAOYSA-N	experimental	0.0105913	Known	#N/A	aging
DB08468	Ellagic acid	5281855	CA12	5281855	Oc1cc2c(=O)oc3c4c2c(c1O)oc(=O)c4cc(c3O)O	AFSDNFLWKVMVRB-UHFFFAOYSA-N	experimental	0.0107142	Known	#N/A	aging
DB08468	Ellagic acid	5281855	CA13	5281855	Oc1cc2c(=O)oc3c4c2c(c1O)oc(=O)c4cc(c3O)O	AFSDNFLWKVMVRB-UHFFFAOYSA-N	experimental	0.00745626	Known	#N/A	aging
DB08468	Ellagic acid	5281855	CA14	5281855	Oc1cc2c(=O)oc3c4c2c(c1O)oc(=O)c4cc(c3O)O	AFSDNFLWKVMVRB-UHFFFAOYSA-N	experimental	0.0083097	Known	#N/A	aging
DB08468	Ellagic acid	5281855	CA2	5281855	Oc1cc2c(=O)oc3c4c2c(c1O)oc(=O)c4cc(c3O)O	AFSDNFLWKVMVRB-UHFFFAOYSA-N	experimental	0.0091403	Known	#N/A	aging
DB08468	Ellagic acid	5281855	CA4	5281855	Oc1cc2c(=O)oc3c4c2c(c1O)oc(=O)c4cc(c3O)O	AFSDNFLWKVMVRB-UHFFFAOYSA-N	experimental	0.0079727	Known	#N/A	aging
DB08468	Ellagic acid	5281855	CA5A	5281855	Oc1cc2c(=O)oc3c4c2c(c1O)oc(=O)c4cc(c3O)O	AFSDNFLWKVMVRB-UHFFFAOYSA-N	experimental	0.00659696	Known	#N/A	aging
DB08468	Ellagic acid	5281855	CA6	5281855	Oc1cc2c(=O)oc3c4c2c(c1O)oc(=O)c4cc(c3O)O	AFSDNFLWKVMVRB-UHFFFAOYSA-N	experimental	0.00819562	Known	#N/A	aging
DB08468	Ellagic acid	5281855	CA7	5281855	Oc1cc2c(=O)oc3c4c2c(c1O)oc(=O)c4cc(c3O)O	AFSDNFLWKVMVRB-UHFFFAOYSA-N	experimental	0.0102869	Known	#N/A	aging
DB08468	Ellagic acid	5281855	CA9	5281855	Oc1cc2c(=O)oc3c4c2c(c1O)oc(=O)c4cc(c3O)O	AFSDNFLWKVMVRB-UHFFFAOYSA-N	experimental	0.0107224	Known	#N/A	aging
DB08468	Ellagic acid	5281855	CCNA1	5281855	Oc1cc2c(=O)oc3c4c2c(c1O)oc(=O)c4cc(c3O)O	AFSDNFLWKVMVRB-UHFFFAOYSA-N	experimental	0.00792862	Known	#N/A	aging
DB08468	Ellagic acid	5281855	CCND1	5281855	Oc1cc2c(=O)oc3c4c2c(c1O)oc(=O)c4cc(c3O)O	AFSDNFLWKVMVRB-UHFFFAOYSA-N	experimental	0.0105734	Known	#N/A	aging
DB08468	Ellagic acid	5281855	CDK2	5281855	Oc1cc2c(=O)oc3c4c2c(c1O)oc(=O)c4cc(c3O)O	AFSDNFLWKVMVRB-UHFFFAOYSA-N	experimental	0.00573555	Known	#N/A	aging
DB08468	Ellagic acid	5281855	CSNK2A1	5281855	Oc1cc2c(=O)oc3c4c2c(c1O)oc(=O)c4cc(c3O)O	AFSDNFLWKVMVRB-UHFFFAOYSA-N	experimental	0.00560274	Known	#N/A	aging
DB08468	Ellagic acid	5281855	DUSP3	5281855	Oc1cc2c(=O)oc3c4c2c(c1O)oc(=O)c4cc(c3O)O	AFSDNFLWKVMVRB-UHFFFAOYSA-N	experimental	0.00695797	Known	#N/A	aging
DB08468	Ellagic acid	5281855	EPHB4	5281855	Oc1cc2c(=O)oc3c4c2c(c1O)oc(=O)c4cc(c3O)O	AFSDNFLWKVMVRB-UHFFFAOYSA-N	experimental	0.00920469	Known	#N/A	aging
DB08468	Ellagic acid	5281855	FLT4	5281855	Oc1cc2c(=O)oc3c4c2c(c1O)oc(=O)c4cc(c3O)O	AFSDNFLWKVMVRB-UHFFFAOYSA-N	experimental	0.00925253	Known	#N/A	aging
DB08468	Ellagic acid	5281855	GAA	5281855	Oc1cc2c(=O)oc3c4c2c(c1O)oc(=O)c4cc(c3O)O	AFSDNFLWKVMVRB-UHFFFAOYSA-N	experimental	0.00416696	Known	#N/A	aging
DB08468	Ellagic acid	5281855	GPR35	5281855	Oc1cc2c(=O)oc3c4c2c(c1O)oc(=O)c4cc(c3O)O	AFSDNFLWKVMVRB-UHFFFAOYSA-N	experimental	0.00405541	Known	#N/A	aging
DB08468	Ellagic acid	5281855	HBB	5281855	Oc1cc2c(=O)oc3c4c2c(c1O)oc(=O)c4cc(c3O)O	AFSDNFLWKVMVRB-UHFFFAOYSA-N	experimental	0.00703976	Known	#N/A	aging
DB08468	Ellagic acid	5281855	HPGD	5281855	Oc1cc2c(=O)oc3c4c2c(c1O)oc(=O)c4cc(c3O)O	AFSDNFLWKVMVRB-UHFFFAOYSA-N	experimental	0.00501212	Known	#N/A	aging
DB08468	Ellagic acid	5281855	HSD17B10	5281855	Oc1cc2c(=O)oc3c4c2c(c1O)oc(=O)c4cc(c3O)O	AFSDNFLWKVMVRB-UHFFFAOYSA-N	experimental	0.00506139	Known	#N/A	aging
DB08468	Ellagic acid	5281855	KDM4E	5281855	Oc1cc2c(=O)oc3c4c2c(c1O)oc(=O)c4cc(c3O)O	AFSDNFLWKVMVRB-UHFFFAOYSA-N	experimental	0.00532609	Known	#N/A	aging
DB08468	Ellagic acid	5281855	KDR	5281855	Oc1cc2c(=O)oc3c4c2c(c1O)oc(=O)c4cc(c3O)O	AFSDNFLWKVMVRB-UHFFFAOYSA-N	experimental	0.0102584	Known	#N/A	aging
DB08468	Ellagic acid	5281855	MAP3K8	5281855	Oc1cc2c(=O)oc3c4c2c(c1O)oc(=O)c4cc(c3O)O	AFSDNFLWKVMVRB-UHFFFAOYSA-N	experimental	0.00984046	Known	#N/A	aging
DB08468	Ellagic acid	5281855	MET	5281855	Oc1cc2c(=O)oc3c4c2c(c1O)oc(=O)c4cc(c3O)O	AFSDNFLWKVMVRB-UHFFFAOYSA-N	experimental	0.00878813	Known	#N/A	aging
DB08468	Ellagic acid	5281855	NUAK1	5281855	Oc1cc2c(=O)oc3c4c2c(c1O)oc(=O)c4cc(c3O)O	AFSDNFLWKVMVRB-UHFFFAOYSA-N	experimental	0.00850177	Known	#N/A	aging
DB08468	Ellagic acid	5281855	PLK1	5281855	Oc1cc2c(=O)oc3c4c2c(c1O)oc(=O)c4cc(c3O)O	AFSDNFLWKVMVRB-UHFFFAOYSA-N	experimental	0.0090232	Known	#N/A	aging
DB08468	Ellagic acid	5281855	PLK4	5281855	Oc1cc2c(=O)oc3c4c2c(c1O)oc(=O)c4cc(c3O)O	AFSDNFLWKVMVRB-UHFFFAOYSA-N	experimental	0.00878496	Known	#N/A	aging
DB08468	Ellagic acid	5281855	RECQL	5281855	Oc1cc2c(=O)oc3c4c2c(c1O)oc(=O)c4cc(c3O)O	AFSDNFLWKVMVRB-UHFFFAOYSA-N	experimental	0.00482628	Known	#N/A	aging
DB08468	Ellagic acid	5281855	SLC22A6	5281855	Oc1cc2c(=O)oc3c4c2c(c1O)oc(=O)c4cc(c3O)O	AFSDNFLWKVMVRB-UHFFFAOYSA-N	experimental	0.00622763	Known	#N/A	aging
DB08468	Ellagic acid	5281855	SMAD3	5281855	Oc1cc2c(=O)oc3c4c2c(c1O)oc(=O)c4cc(c3O)O	AFSDNFLWKVMVRB-UHFFFAOYSA-N	experimental	0.00622763	Known	#N/A	aging
DB08468	Ellagic acid	5281855	SRC	5281855	Oc1cc2c(=O)oc3c4c2c(c1O)oc(=O)c4cc(c3O)O	AFSDNFLWKVMVRB-UHFFFAOYSA-N	experimental	0.00893413	Known	#N/A	aging
DB08468	Ellagic acid	5281855	TDP1	5281855	Oc1cc2c(=O)oc3c4c2c(c1O)oc(=O)c4cc(c3O)O	AFSDNFLWKVMVRB-UHFFFAOYSA-N	experimental	0.00538045	Known	#N/A	aging
DB08468	Ellagic acid	5281855	TEK	5281855	Oc1cc2c(=O)oc3c4c2c(c1O)oc(=O)c4cc(c3O)O	AFSDNFLWKVMVRB-UHFFFAOYSA-N	experimental	0.00920469	Known	#N/A	aging
DB08468	Ellagic acid	5281855	USP2	5281855	Oc1cc2c(=O)oc3c4c2c(c1O)oc(=O)c4cc(c3O)O	AFSDNFLWKVMVRB-UHFFFAOYSA-N	experimental	0.00349414	Known	#N/A	aging
DB07715	Emodin	3220	TP53	3220	Cc1cc(O)c2c(c1)C(=O)c1c(C2=O)c(O)cc(c1)O	RHMXXJGYXNZAPX-UHFFFAOYSA-N	experimental	0.00543556	1	Homo sapiens	aging
DB07715	Emodin	3220	BLM	3220	Cc1cc(O)c2c(c1)C(=O)c1c(C2=O)c(O)cc(c1)O	RHMXXJGYXNZAPX-UHFFFAOYSA-N	experimental	0.0105148	Known	Homo sapiens	aging
DB07715	Emodin	3220	ESR1	3220	Cc1cc(O)c2c(c1)C(=O)c1c(C2=O)c(O)cc(c1)O	RHMXXJGYXNZAPX-UHFFFAOYSA-N	experimental	0.0247781	Known	Homo sapiens	aging
DB07715	Emodin	3220	HIF1A	3220	Cc1cc(O)c2c(c1)C(=O)c1c(C2=O)c(O)cc(c1)O	RHMXXJGYXNZAPX-UHFFFAOYSA-N	experimental	0.0119472	Known	Homo sapiens	aging
DB07715	Emodin	3220	LMNA	3220	Cc1cc(O)c2c(c1)C(=O)c1c(C2=O)c(O)cc(c1)O	RHMXXJGYXNZAPX-UHFFFAOYSA-N	experimental	0.0111098	Known	Homo sapiens	aging
DB07715	Emodin	3220	MAPT	3220	Cc1cc(O)c2c(c1)C(=O)c1c(C2=O)c(O)cc(c1)O	RHMXXJGYXNZAPX-UHFFFAOYSA-N	experimental	0.0108022	Known	Homo sapiens	aging
DB07715	Emodin	3220	HPGD	3220	Cc1cc(O)c2c(c1)C(=O)c1c(C2=O)c(O)cc(c1)O	RHMXXJGYXNZAPX-UHFFFAOYSA-N	experimental	0.00511992	2	#N/A	aging
DB07715	Emodin	3220	ALDH1A1	3220	Cc1cc(O)c2c(c1)C(=O)c1c(C2=O)c(O)cc(c1)O	RHMXXJGYXNZAPX-UHFFFAOYSA-N	experimental	0.00498796	3	#N/A	aging
DB07715	Emodin	3220	KDM4E	3220	Cc1cc(O)c2c(c1)C(=O)c1c(C2=O)c(O)cc(c1)O	RHMXXJGYXNZAPX-UHFFFAOYSA-N	experimental	0.00466281	5	#N/A	aging
DB07715	Emodin	3220	ALOX15	3220	Cc1cc(O)c2c(c1)C(=O)c1c(C2=O)c(O)cc(c1)O	RHMXXJGYXNZAPX-UHFFFAOYSA-N	experimental	0.0122971	Known	#N/A	aging
DB07715	Emodin	3220	CSNK2A1	3220	Cc1cc(O)c2c(c1)C(=O)c1c(C2=O)c(O)cc(c1)O	RHMXXJGYXNZAPX-UHFFFAOYSA-N	experimental	0.0143653	Known	#N/A	aging
DB07715	Emodin	3220	CSNK2B	3220	Cc1cc(O)c2c(c1)C(=O)c1c(C2=O)c(O)cc(c1)O	RHMXXJGYXNZAPX-UHFFFAOYSA-N	experimental	0.0220881	Known	#N/A	aging
DB07715	Emodin	3220	ESR2	3220	Cc1cc(O)c2c(c1)C(=O)c1c(C2=O)c(O)cc(c1)O	RHMXXJGYXNZAPX-UHFFFAOYSA-N	experimental	0.0246131	Known	#N/A	aging
DB07715	Emodin	3220	HSD17B10	3220	Cc1cc(O)c2c(c1)C(=O)c1c(C2=O)c(O)cc(c1)O	RHMXXJGYXNZAPX-UHFFFAOYSA-N	experimental	0.0126332	Known	#N/A	aging
DB07715	Emodin	3220	PTP4A3	3220	Cc1cc(O)c2c(c1)C(=O)c1c(C2=O)c(O)cc(c1)O	RHMXXJGYXNZAPX-UHFFFAOYSA-N	experimental	0.0285524	Known	#N/A	aging
DB07715	Emodin	3220	TSHR	3220	Cc1cc(O)c2c(c1)C(=O)c1c(C2=O)c(O)cc(c1)O	RHMXXJGYXNZAPX-UHFFFAOYSA-N	experimental	0.0137244	Known	#N/A	aging
DB00824	Enprofylline	1676	LMNA	1676	CCCn1c(=O)[nH]c(=O)c2c1nc[nH]2	SIQPXVQCUCHWDI-UHFFFAOYSA-N	approved	0.0102587	4	Homo sapiens	aging
DB00824	Enprofylline	1676	HIF1A	1676	CCCn1c(=O)[nH]c(=O)c2c1nc[nH]2	SIQPXVQCUCHWDI-UHFFFAOYSA-N	approved	0.00856805	5	Homo sapiens	aging
DB00824	Enprofylline	1676	BLM	1676	CCCn1c(=O)[nH]c(=O)c2c1nc[nH]2	SIQPXVQCUCHWDI-UHFFFAOYSA-N	approved	0.021867	Known	Homo sapiens	aging
DB00824	Enprofylline	1676	ADORA1	1676	CCCn1c(=O)[nH]c(=O)c2c1nc[nH]2	SIQPXVQCUCHWDI-UHFFFAOYSA-N	approved	0.0276599	1	#N/A	aging
DB00824	Enprofylline	1676	TDP1	1676	CCCn1c(=O)[nH]c(=O)c2c1nc[nH]2	SIQPXVQCUCHWDI-UHFFFAOYSA-N	approved	0.011481	2	#N/A	aging
DB00824	Enprofylline	1676	ADORA3	1676	CCCn1c(=O)[nH]c(=O)c2c1nc[nH]2	SIQPXVQCUCHWDI-UHFFFAOYSA-N	approved	0.0111109	3	#N/A	aging
DB00824	Enprofylline	1676	ADORA2A	1676	CCCn1c(=O)[nH]c(=O)c2c1nc[nH]2	SIQPXVQCUCHWDI-UHFFFAOYSA-N	approved	0.0793972	Known	#N/A	aging
DB00824	Enprofylline	1676	ADORA2B	1676	CCCn1c(=O)[nH]c(=O)c2c1nc[nH]2	SIQPXVQCUCHWDI-UHFFFAOYSA-N	approved	0.0907774	Known	#N/A	aging
DB00824	Enprofylline	1676	HPGD	1676	CCCn1c(=O)[nH]c(=O)c2c1nc[nH]2	SIQPXVQCUCHWDI-UHFFFAOYSA-N	approved	0.0302058	Known	#N/A	aging
DB00824	Enprofylline	1676	HSD17B10	1676	CCCn1c(=O)[nH]c(=O)c2c1nc[nH]2	SIQPXVQCUCHWDI-UHFFFAOYSA-N	approved	0.0298746	Known	#N/A	aging
DB00783	Estradiol	5757	NR3C1	5757	Oc1ccc2c(c1)CC[C@@H]1[C@@H]2CC[C@]2([C@H]1CC[C@@H]2O)C	VOXZDWNPVJITMN-ZBRFXRBCSA-N	approved; investigational; vet_approved	0.00942645	1	Homo sapiens	aging
DB00783	Estradiol	5757	AR	5757	Oc1ccc2c(c1)CC[C@@H]1[C@@H]2CC[C@]2([C@H]1CC[C@@H]2O)C	VOXZDWNPVJITMN-ZBRFXRBCSA-N	approved; investigational; vet_approved	0.0207831	Known	Homo sapiens	aging
DB00783	Estradiol	5757	BLM	5757	Oc1ccc2c(c1)CC[C@@H]1[C@@H]2CC[C@]2([C@H]1CC[C@@H]2O)C	VOXZDWNPVJITMN-ZBRFXRBCSA-N	approved; investigational; vet_approved	0.0091812	Known	Homo sapiens	aging
DB00783	Estradiol	5757	ESR1	5757	Oc1ccc2c(c1)CC[C@@H]1[C@@H]2CC[C@]2([C@H]1CC[C@@H]2O)C	VOXZDWNPVJITMN-ZBRFXRBCSA-N	approved; investigational; vet_approved	0.0221181	Known	Homo sapiens	aging
DB00783	Estradiol	5757	LMNA	5757	Oc1ccc2c(c1)CC[C@@H]1[C@@H]2CC[C@]2([C@H]1CC[C@@H]2O)C	VOXZDWNPVJITMN-ZBRFXRBCSA-N	approved; investigational; vet_approved	0.00804008	Known	Homo sapiens	aging
DB00783	Estradiol	5757	MAPT	5757	Oc1ccc2c(c1)CC[C@@H]1[C@@H]2CC[C@]2([C@H]1CC[C@@H]2O)C	VOXZDWNPVJITMN-ZBRFXRBCSA-N	approved; investigational; vet_approved	0.00794559	Known	Homo sapiens	aging
DB00783	Estradiol	5757	NR3C2	5757	Oc1ccc2c(c1)CC[C@@H]1[C@@H]2CC[C@]2([C@H]1CC[C@@H]2O)C	VOXZDWNPVJITMN-ZBRFXRBCSA-N	approved; investigational; vet_approved	0.0065906	2	#N/A	aging
DB00783	Estradiol	5757	PGR	5757	Oc1ccc2c(c1)CC[C@@H]1[C@@H]2CC[C@]2([C@H]1CC[C@@H]2O)C	VOXZDWNPVJITMN-ZBRFXRBCSA-N	approved; investigational; vet_approved	0.0065906	3	#N/A	aging
DB00783	Estradiol	5757	HSD17B1	5757	Oc1ccc2c(c1)CC[C@@H]1[C@@H]2CC[C@]2([C@H]1CC[C@@H]2O)C	VOXZDWNPVJITMN-ZBRFXRBCSA-N	approved; investigational; vet_approved	0.00589726	4	#N/A	aging
DB00783	Estradiol	5757	AOX1	5757	Oc1ccc2c(c1)CC[C@@H]1[C@@H]2CC[C@]2([C@H]1CC[C@@H]2O)C	VOXZDWNPVJITMN-ZBRFXRBCSA-N	approved; investigational; vet_approved	0.022521	Known	#N/A	aging
DB00783	Estradiol	5757	ESR2	5757	Oc1ccc2c(c1)CC[C@@H]1[C@@H]2CC[C@]2([C@H]1CC[C@@H]2O)C	VOXZDWNPVJITMN-ZBRFXRBCSA-N	approved; investigational; vet_approved	0.0250793	Known	#N/A	aging
DB00783	Estradiol	5757	ESRRA	5757	Oc1ccc2c(c1)CC[C@@H]1[C@@H]2CC[C@]2([C@H]1CC[C@@H]2O)C	VOXZDWNPVJITMN-ZBRFXRBCSA-N	approved; investigational; vet_approved	0.0209536	Known	#N/A	aging
DB00783	Estradiol	5757	ESRRB	5757	Oc1ccc2c(c1)CC[C@@H]1[C@@H]2CC[C@]2([C@H]1CC[C@@H]2O)C	VOXZDWNPVJITMN-ZBRFXRBCSA-N	approved; investigational; vet_approved	0.0252822	Known	#N/A	aging
DB00783	Estradiol	5757	ESRRG	5757	Oc1ccc2c(c1)CC[C@@H]1[C@@H]2CC[C@]2([C@H]1CC[C@@H]2O)C	VOXZDWNPVJITMN-ZBRFXRBCSA-N	approved; investigational; vet_approved	0.0301167	Known	#N/A	aging
DB00783	Estradiol	5757	GPER1	5757	Oc1ccc2c(c1)CC[C@@H]1[C@@H]2CC[C@]2([C@H]1CC[C@@H]2O)C	VOXZDWNPVJITMN-ZBRFXRBCSA-N	approved; investigational; vet_approved	0.027313	Known	#N/A	aging
DB00783	Estradiol	5757	SHBG	5757	Oc1ccc2c(c1)CC[C@@H]1[C@@H]2CC[C@]2([C@H]1CC[C@@H]2O)C	VOXZDWNPVJITMN-ZBRFXRBCSA-N	approved; investigational; vet_approved	0.0171298	Known	#N/A	aging
DB00783	Estradiol	5757	SLC22A1	5757	Oc1ccc2c(c1)CC[C@@H]1[C@@H]2CC[C@]2([C@H]1CC[C@@H]2O)C	VOXZDWNPVJITMN-ZBRFXRBCSA-N	approved; investigational; vet_approved	0.0239735	Known	#N/A	aging
DB00783	Estradiol	5757	SLC22A3	5757	Oc1ccc2c(c1)CC[C@@H]1[C@@H]2CC[C@]2([C@H]1CC[C@@H]2O)C	VOXZDWNPVJITMN-ZBRFXRBCSA-N	approved; investigational; vet_approved	0.0218348	Known	#N/A	aging
DB00783	Estradiol	5757	SMN1	5757	Oc1ccc2c(c1)CC[C@@H]1[C@@H]2CC[C@]2([C@H]1CC[C@@H]2O)C	VOXZDWNPVJITMN-ZBRFXRBCSA-N	approved; investigational; vet_approved	0.00818629	Known	#N/A	aging
DB00783	Estradiol	5757	SULT1A1	5757	Oc1ccc2c(c1)CC[C@@H]1[C@@H]2CC[C@]2([C@H]1CC[C@@H]2O)C	VOXZDWNPVJITMN-ZBRFXRBCSA-N	approved; investigational; vet_approved	0.027313	Known	#N/A	aging
DB00783	Estradiol	5757	SULT1E1	5757	Oc1ccc2c(c1)CC[C@@H]1[C@@H]2CC[C@]2([C@H]1CC[C@@H]2O)C	VOXZDWNPVJITMN-ZBRFXRBCSA-N	approved; investigational; vet_approved	0.027313	Known	#N/A	aging
DB00655	Estrone	5870	MAPT	5870	Oc1ccc2c(c1)CC[C@@H]1[C@@H]2CC[C@]2([C@H]1CCC2=O)C	DNXHEGUUPJUMQT-CBZIJGRNSA-N	approved	0.00505853	4	Homo sapiens	aging
DB00655	Estrone	5870	AR	5870	Oc1ccc2c(c1)CC[C@@H]1[C@@H]2CC[C@]2([C@H]1CCC2=O)C	DNXHEGUUPJUMQT-CBZIJGRNSA-N	approved	0.0050305	5	Homo sapiens	aging
DB00655	Estrone	5870	BLM	5870	Oc1ccc2c(c1)CC[C@@H]1[C@@H]2CC[C@]2([C@H]1CCC2=O)C	DNXHEGUUPJUMQT-CBZIJGRNSA-N	approved	0.0114678	Known	Homo sapiens	aging
DB00655	Estrone	5870	ESR1	5870	Oc1ccc2c(c1)CC[C@@H]1[C@@H]2CC[C@]2([C@H]1CCC2=O)C	DNXHEGUUPJUMQT-CBZIJGRNSA-N	approved	0.0264728	Known	Homo sapiens	aging
DB00655	Estrone	5870	HIF1A	5870	Oc1ccc2c(c1)CC[C@@H]1[C@@H]2CC[C@]2([C@H]1CCC2=O)C	DNXHEGUUPJUMQT-CBZIJGRNSA-N	approved	0.0107333	Known	Homo sapiens	aging
DB00655	Estrone	5870	LMNA	5870	Oc1ccc2c(c1)CC[C@@H]1[C@@H]2CC[C@]2([C@H]1CCC2=O)C	DNXHEGUUPJUMQT-CBZIJGRNSA-N	approved	0.0119803	Known	Homo sapiens	aging
DB00655	Estrone	5870	NFKB1	5870	Oc1ccc2c(c1)CC[C@@H]1[C@@H]2CC[C@]2([C@H]1CCC2=O)C	DNXHEGUUPJUMQT-CBZIJGRNSA-N	approved	0.0111842	Known	Homo sapiens	aging
DB00655	Estrone	5870	THPO	5870	Oc1ccc2c(c1)CC[C@@H]1[C@@H]2CC[C@]2([C@H]1CCC2=O)C	DNXHEGUUPJUMQT-CBZIJGRNSA-N	approved	0.00582137	1	#N/A	aging
DB00655	Estrone	5870	ALOX15	5870	Oc1ccc2c(c1)CC[C@@H]1[C@@H]2CC[C@]2([C@H]1CCC2=O)C	DNXHEGUUPJUMQT-CBZIJGRNSA-N	approved	0.00555034	3	#N/A	aging
DB00655	Estrone	5870	ABCG2	5870	Oc1ccc2c(c1)CC[C@@H]1[C@@H]2CC[C@]2([C@H]1CCC2=O)C	DNXHEGUUPJUMQT-CBZIJGRNSA-N	approved	0.0160657	Known	#N/A	aging
DB00655	Estrone	5870	ESR2	5870	Oc1ccc2c(c1)CC[C@@H]1[C@@H]2CC[C@]2([C@H]1CCC2=O)C	DNXHEGUUPJUMQT-CBZIJGRNSA-N	approved	0.0262575	Known	#N/A	aging
DB00655	Estrone	5870	HSD17B1	5870	Oc1ccc2c(c1)CC[C@@H]1[C@@H]2CC[C@]2([C@H]1CCC2=O)C	DNXHEGUUPJUMQT-CBZIJGRNSA-N	approved	0.0112394	Known	#N/A	aging
DB00655	Estrone	5870	HSD17B10	5870	Oc1ccc2c(c1)CC[C@@H]1[C@@H]2CC[C@]2([C@H]1CCC2=O)C	DNXHEGUUPJUMQT-CBZIJGRNSA-N	approved	0.0107973	Known	#N/A	aging
DB00655	Estrone	5870	PMP22	5870	Oc1ccc2c(c1)CC[C@@H]1[C@@H]2CC[C@]2([C@H]1CCC2=O)C	DNXHEGUUPJUMQT-CBZIJGRNSA-N	approved	0.0144251	Known	#N/A	aging
DB00655	Estrone	5870	SHBG	5870	Oc1ccc2c(c1)CC[C@@H]1[C@@H]2CC[C@]2([C@H]1CCC2=O)C	DNXHEGUUPJUMQT-CBZIJGRNSA-N	approved	0.0161994	Known	#N/A	aging
DB00903	Ethacrynic acid	3278	GSTP1	3278	CCC(=C)C(=O)c1ccc(c(c1Cl)Cl)OCC(=O)O	AVOLMBLBETYQHX-UHFFFAOYSA-N	approved	0.0443196	Known	Homo sapiens	aging
DB00903	Ethacrynic acid	3278	HTT	3278	CCC(=C)C(=O)c1ccc(c(c1Cl)Cl)OCC(=O)O	AVOLMBLBETYQHX-UHFFFAOYSA-N	approved	0.0197367	Known	Homo sapiens	aging
DB00903	Ethacrynic acid	3278	LMNA	3278	CCC(=C)C(=O)c1ccc(c(c1Cl)Cl)OCC(=O)O	AVOLMBLBETYQHX-UHFFFAOYSA-N	approved	0.0138821	Known	Homo sapiens	aging
DB00903	Ethacrynic acid	3278	MAPT	3278	CCC(=C)C(=O)c1ccc(c(c1Cl)Cl)OCC(=O)O	AVOLMBLBETYQHX-UHFFFAOYSA-N	approved	0.0127819	Known	Homo sapiens	aging
DB00903	Ethacrynic acid	3278	ABCC1	3278	CCC(=C)C(=O)c1ccc(c(c1Cl)Cl)OCC(=O)O	AVOLMBLBETYQHX-UHFFFAOYSA-N	approved	0.00994074	1	#N/A	aging
DB00903	Ethacrynic acid	3278	MAOB	3278	CCC(=C)C(=O)c1ccc(c(c1Cl)Cl)OCC(=O)O	AVOLMBLBETYQHX-UHFFFAOYSA-N	approved	0.0077755	2	#N/A	aging
DB00903	Ethacrynic acid	3278	RECQL	3278	CCC(=C)C(=O)c1ccc(c(c1Cl)Cl)OCC(=O)O	AVOLMBLBETYQHX-UHFFFAOYSA-N	approved	0.00544399	4	#N/A	aging
DB00903	Ethacrynic acid	3278	GSTA1	3278	CCC(=C)C(=O)c1ccc(c(c1Cl)Cl)OCC(=O)O	AVOLMBLBETYQHX-UHFFFAOYSA-N	approved	0.0350266	Known	#N/A	aging
DB00903	Ethacrynic acid	3278	KMT2A	3278	CCC(=C)C(=O)c1ccc(c(c1Cl)Cl)OCC(=O)O	AVOLMBLBETYQHX-UHFFFAOYSA-N	approved	0.0139736	Known	#N/A	aging
DB00903	Ethacrynic acid	3278	PLIN1	3278	CCC(=C)C(=O)c1ccc(c(c1Cl)Cl)OCC(=O)O	AVOLMBLBETYQHX-UHFFFAOYSA-N	approved	0.0429929	Known	#N/A	aging
DB00903	Ethacrynic acid	3278	PLIN5	3278	CCC(=C)C(=O)c1ccc(c(c1Cl)Cl)OCC(=O)O	AVOLMBLBETYQHX-UHFFFAOYSA-N	approved	0.0459534	Known	#N/A	aging
DB00898	Ethanol	702	LMNA	702	CCO	LFQSCWFLJHTTHZ-UHFFFAOYSA-N	approved	0.0107354	1	Homo sapiens	aging
DB00898	Ethanol	702	TP53	702	CCO	LFQSCWFLJHTTHZ-UHFFFAOYSA-N	approved	0.00792635	2	Homo sapiens	aging
DB00898	Ethanol	702	NFKB1	702	CCO	LFQSCWFLJHTTHZ-UHFFFAOYSA-N	approved	0.00533529	5	Homo sapiens	aging
DB00898	Ethanol	702	LTA4H	702	CCO	LFQSCWFLJHTTHZ-UHFFFAOYSA-N	approved	0.00677422	3	#N/A	aging
DB00898	Ethanol	702	TBXAS1	702	CCO	LFQSCWFLJHTTHZ-UHFFFAOYSA-N	approved	0.00586269	4	#N/A	aging
DB00898	Ethanol	702	TSHR	702	CCO	LFQSCWFLJHTTHZ-UHFFFAOYSA-N	approved	0.118799	Known	#N/A	aging
DB09086	Eugenol	3314	MAPT	3314	C=CCc1ccc(c(c1)OC)O	RRAFCDWBNXTKKO-UHFFFAOYSA-N	approved	0.0117563	1	Homo sapiens	aging
DB09086	Eugenol	3314	MAPK1	3314	C=CCc1ccc(c(c1)OC)O	RRAFCDWBNXTKKO-UHFFFAOYSA-N	approved	0.00886002	4	homologous analysis	aging
DB09086	Eugenol	3314	HPGD	3314	C=CCc1ccc(c(c1)OC)O	RRAFCDWBNXTKKO-UHFFFAOYSA-N	approved	0.0103641	3	#N/A	aging
DB07795	Fisetin	5281614	CDK1	5281614	Oc1ccc2c(c1)oc(c(c2=O)O)c1ccc(c(c1)O)O	XHEFDIBZLJXQHF-UHFFFAOYSA-N	experimental	0.00654626	2	Homo sapiens	aging
DB07795	Fisetin	5281614	APEX1	5281614	Oc1ccc2c(c1)oc(c(c2=O)O)c1ccc(c(c1)O)O	XHEFDIBZLJXQHF-UHFFFAOYSA-N	experimental	0.00891957	Known	Homo sapiens	aging
DB07795	Fisetin	5281614	CREBBP	5281614	Oc1ccc2c(c1)oc(c(c2=O)O)c1ccc(c(c1)O)O	XHEFDIBZLJXQHF-UHFFFAOYSA-N	experimental	0.0115488	Known	Homo sapiens	aging
DB07795	Fisetin	5281614	MAPK14	5281614	Oc1ccc2c(c1)oc(c(c2=O)O)c1ccc(c(c1)O)O	XHEFDIBZLJXQHF-UHFFFAOYSA-N	experimental	0.0143576	Known	Homo sapiens	aging
DB07795	Fisetin	5281614	MAPT	5281614	Oc1ccc2c(c1)oc(c(c2=O)O)c1ccc(c(c1)O)O	XHEFDIBZLJXQHF-UHFFFAOYSA-N	experimental	0.0110512	Known	Homo sapiens	aging
DB07795	Fisetin	5281614	TP53	5281614	Oc1ccc2c(c1)oc(c(c2=O)O)c1ccc(c(c1)O)O	XHEFDIBZLJXQHF-UHFFFAOYSA-N	experimental	0.0105162	Known	Homo sapiens	aging
DB07795	Fisetin	5281614	MAPK1	5281614	Oc1ccc2c(c1)oc(c(c2=O)O)c1ccc(c(c1)O)O	XHEFDIBZLJXQHF-UHFFFAOYSA-N	experimental	0.0103978	Known	homologous analysis	aging
DB07795	Fisetin	5281614	MAPK10	5281614	Oc1ccc2c(c1)oc(c(c2=O)O)c1ccc(c(c1)O)O	XHEFDIBZLJXQHF-UHFFFAOYSA-N	experimental	0.0160665	Known	homologous analysis	aging
DB07795	Fisetin	5281614	CDK4	5281614	Oc1ccc2c(c1)oc(c(c2=O)O)c1ccc(c(c1)O)O	XHEFDIBZLJXQHF-UHFFFAOYSA-N	experimental	0.00704903	1	#N/A	aging
DB07795	Fisetin	5281614	KDM4E	5281614	Oc1ccc2c(c1)oc(c(c2=O)O)c1ccc(c(c1)O)O	XHEFDIBZLJXQHF-UHFFFAOYSA-N	experimental	0.00648049	3	#N/A	aging
DB07795	Fisetin	5281614	TDP1	5281614	Oc1ccc2c(c1)oc(c(c2=O)O)c1ccc(c(c1)O)O	XHEFDIBZLJXQHF-UHFFFAOYSA-N	experimental	0.00609748	4	#N/A	aging
DB07795	Fisetin	5281614	ACHE	5281614	Oc1ccc2c(c1)oc(c(c2=O)O)c1ccc(c(c1)O)O	XHEFDIBZLJXQHF-UHFFFAOYSA-N	experimental	0.0102538	Known	#N/A	aging
DB07795	Fisetin	5281614	ALOX12	5281614	Oc1ccc2c(c1)oc(c(c2=O)O)c1ccc(c(c1)O)O	XHEFDIBZLJXQHF-UHFFFAOYSA-N	experimental	0.0105971	Known	#N/A	aging
DB07795	Fisetin	5281614	ALOX15	5281614	Oc1ccc2c(c1)oc(c(c2=O)O)c1ccc(c(c1)O)O	XHEFDIBZLJXQHF-UHFFFAOYSA-N	experimental	0.0131188	Known	#N/A	aging
DB07795	Fisetin	5281614	CDK2	5281614	Oc1ccc2c(c1)oc(c(c2=O)O)c1ccc(c(c1)O)O	XHEFDIBZLJXQHF-UHFFFAOYSA-N	experimental	0.0106258	Known	#N/A	aging
DB07795	Fisetin	5281614	CDK5	5281614	Oc1ccc2c(c1)oc(c(c2=O)O)c1ccc(c(c1)O)O	XHEFDIBZLJXQHF-UHFFFAOYSA-N	experimental	0.0142054	Known	#N/A	aging
DB07795	Fisetin	5281614	CDK6	5281614	Oc1ccc2c(c1)oc(c(c2=O)O)c1ccc(c(c1)O)O	XHEFDIBZLJXQHF-UHFFFAOYSA-N	experimental	0.0132648	Known	#N/A	aging
DB07795	Fisetin	5281614	HPGD	5281614	Oc1ccc2c(c1)oc(c(c2=O)O)c1ccc(c(c1)O)O	XHEFDIBZLJXQHF-UHFFFAOYSA-N	experimental	0.0122653	Known	#N/A	aging
DB07795	Fisetin	5281614	HSD17B10	5281614	Oc1ccc2c(c1)oc(c(c2=O)O)c1ccc(c(c1)O)O	XHEFDIBZLJXQHF-UHFFFAOYSA-N	experimental	0.0101526	Known	#N/A	aging
DB07795	Fisetin	5281614	KMT2A	5281614	Oc1ccc2c(c1)oc(c(c2=O)O)c1ccc(c(c1)O)O	XHEFDIBZLJXQHF-UHFFFAOYSA-N	experimental	0.00824716	Known	#N/A	aging
DB07795	Fisetin	5281614	PIM1	5281614	Oc1ccc2c(c1)oc(c(c2=O)O)c1ccc(c(c1)O)O	XHEFDIBZLJXQHF-UHFFFAOYSA-N	experimental	0.0137128	Known	#N/A	aging
DB07795	Fisetin	5281614	RECQL	5281614	Oc1ccc2c(c1)oc(c(c2=O)O)c1ccc(c(c1)O)O	XHEFDIBZLJXQHF-UHFFFAOYSA-N	experimental	0.0093015	Known	#N/A	aging
DB07795	Fisetin	5281614	XDH	5281614	Oc1ccc2c(c1)oc(c(c2=O)O)c1ccc(c(c1)O)O	XHEFDIBZLJXQHF-UHFFFAOYSA-N	experimental	0.0146939	Known	#N/A	aging
DB00544	Fluorouracil	3385	BLM	3385	Fc1c[nH]c(=O)[nH]c1=O	GHASVSINZRGABV-UHFFFAOYSA-N	approved	0.00786346	1	Homo sapiens	aging
DB00544	Fluorouracil	3385	TP53	3385	Fc1c[nH]c(=O)[nH]c1=O	GHASVSINZRGABV-UHFFFAOYSA-N	approved	0.00708066	2	Homo sapiens	aging
DB00544	Fluorouracil	3385	HTT	3385	Fc1c[nH]c(=O)[nH]c1=O	GHASVSINZRGABV-UHFFFAOYSA-N	approved	0.0212943	Known	Homo sapiens	aging
DB00544	Fluorouracil	3385	LMNA	3385	Fc1c[nH]c(=O)[nH]c1=O	GHASVSINZRGABV-UHFFFAOYSA-N	approved	0.0189608	Known	Homo sapiens	aging
DB00544	Fluorouracil	3385	MAPT	3385	Fc1c[nH]c(=O)[nH]c1=O	GHASVSINZRGABV-UHFFFAOYSA-N	approved	0.0133288	Known	Homo sapiens	aging
DB00544	Fluorouracil	3385	ALOX15	3385	Fc1c[nH]c(=O)[nH]c1=O	GHASVSINZRGABV-UHFFFAOYSA-N	approved	0.00632268	4	#N/A	aging
DB00544	Fluorouracil	3385	HSD17B10	3385	Fc1c[nH]c(=O)[nH]c1=O	GHASVSINZRGABV-UHFFFAOYSA-N	approved	0.00612514	5	#N/A	aging
DB00544	Fluorouracil	3385	PMP22	3385	Fc1c[nH]c(=O)[nH]c1=O	GHASVSINZRGABV-UHFFFAOYSA-N	approved	0.0221688	Known	#N/A	aging
DB00544	Fluorouracil	3385	SMN1	3385	Fc1c[nH]c(=O)[nH]c1=O	GHASVSINZRGABV-UHFFFAOYSA-N	approved	0.0147435	Known	#N/A	aging
DB00544	Fluorouracil	3385	THPO	3385	Fc1c[nH]c(=O)[nH]c1=O	GHASVSINZRGABV-UHFFFAOYSA-N	approved	0.0159667	Known	#N/A	aging
DB00544	Fluorouracil	3385	TSHR	3385	Fc1c[nH]c(=O)[nH]c1=O	GHASVSINZRGABV-UHFFFAOYSA-N	approved	0.0236259	Known	#N/A	aging
DB01645	Genistein	5280961	LMNA	5280961	Oc1ccc(cc1)c1coc2c(c1=O)c(O)cc(c2)O	TZBJGXHYKVUXJN-UHFFFAOYSA-N	investigational	0.00479185	1	Homo sapiens	aging
DB01645	Genistein	5280961	ABL1	5280961	Oc1ccc(cc1)c1coc2c(c1=O)c(O)cc(c2)O	TZBJGXHYKVUXJN-UHFFFAOYSA-N	investigational	0.00772464	Known	Homo sapiens	aging
DB01645	Genistein	5280961	AR	5280961	Oc1ccc(cc1)c1coc2c(c1=O)c(O)cc(c2)O	TZBJGXHYKVUXJN-UHFFFAOYSA-N	investigational	0.0159204	Known	Homo sapiens	aging
DB01645	Genistein	5280961	BLM	5280961	Oc1ccc(cc1)c1coc2c(c1=O)c(O)cc(c2)O	TZBJGXHYKVUXJN-UHFFFAOYSA-N	investigational	0.00563216	Known	Homo sapiens	aging
DB01645	Genistein	5280961	EGFR	5280961	Oc1ccc(cc1)c1coc2c(c1=O)c(O)cc(c2)O	TZBJGXHYKVUXJN-UHFFFAOYSA-N	investigational	0.0068171	Known	Homo sapiens	aging
DB01645	Genistein	5280961	ESR1	5280961	Oc1ccc(cc1)c1coc2c(c1=O)c(O)cc(c2)O	TZBJGXHYKVUXJN-UHFFFAOYSA-N	investigational	0.0139765	Known	Homo sapiens	aging
DB01645	Genistein	5280961	HIF1A	5280961	Oc1ccc(cc1)c1coc2c(c1=O)c(O)cc(c2)O	TZBJGXHYKVUXJN-UHFFFAOYSA-N	investigational	0.00669156	Known	Homo sapiens	aging
DB01645	Genistein	5280961	MAPT	5280961	Oc1ccc(cc1)c1coc2c(c1=O)c(O)cc(c2)O	TZBJGXHYKVUXJN-UHFFFAOYSA-N	investigational	0.00773357	Known	Homo sapiens	aging
DB01645	Genistein	5280961	NR3C1	5280961	Oc1ccc(cc1)c1coc2c(c1=O)c(O)cc(c2)O	TZBJGXHYKVUXJN-UHFFFAOYSA-N	investigational	0.0123115	Known	Homo sapiens	aging
DB01645	Genistein	5280961	TP53	5280961	Oc1ccc(cc1)c1coc2c(c1=O)c(O)cc(c2)O	TZBJGXHYKVUXJN-UHFFFAOYSA-N	investigational	0.00968482	Known	Homo sapiens	aging
DB01645	Genistein	5280961	MAPK1	5280961	Oc1ccc(cc1)c1coc2c(c1=O)c(O)cc(c2)O	TZBJGXHYKVUXJN-UHFFFAOYSA-N	investigational	0.0071602	Known	homologous analysis	aging
DB01645	Genistein	5280961	SULT1A1	5280961	Oc1ccc(cc1)c1coc2c(c1=O)c(O)cc(c2)O	TZBJGXHYKVUXJN-UHFFFAOYSA-N	investigational	0.00473568	2	#N/A	aging
DB01645	Genistein	5280961	SULT1E1	5280961	Oc1ccc(cc1)c1coc2c(c1=O)c(O)cc(c2)O	TZBJGXHYKVUXJN-UHFFFAOYSA-N	investigational	0.00473568	3	#N/A	aging
DB01645	Genistein	5280961	GPER1	5280961	Oc1ccc(cc1)c1coc2c(c1=O)c(O)cc(c2)O	TZBJGXHYKVUXJN-UHFFFAOYSA-N	investigational	0.00473568	4	#N/A	aging
DB01645	Genistein	5280961	BCR	5280961	Oc1ccc(cc1)c1coc2c(c1=O)c(O)cc(c2)O	TZBJGXHYKVUXJN-UHFFFAOYSA-N	investigational	0.00451389	5	#N/A	aging
DB01645	Genistein	5280961	ABCG2	5280961	Oc1ccc(cc1)c1coc2c(c1=O)c(O)cc(c2)O	TZBJGXHYKVUXJN-UHFFFAOYSA-N	investigational	0.0102392	Known	#N/A	aging
DB01645	Genistein	5280961	AOX1	5280961	Oc1ccc(cc1)c1coc2c(c1=O)c(O)cc(c2)O	TZBJGXHYKVUXJN-UHFFFAOYSA-N	investigational	0.008947	Known	#N/A	aging
DB01645	Genistein	5280961	ESR2	5280961	Oc1ccc(cc1)c1coc2c(c1=O)c(O)cc(c2)O	TZBJGXHYKVUXJN-UHFFFAOYSA-N	investigational	0.015277	Known	#N/A	aging
DB01645	Genistein	5280961	ESRRA	5280961	Oc1ccc(cc1)c1coc2c(c1=O)c(O)cc(c2)O	TZBJGXHYKVUXJN-UHFFFAOYSA-N	investigational	0.00879585	Known	#N/A	aging
DB01645	Genistein	5280961	ESRRB	5280961	Oc1ccc(cc1)c1coc2c(c1=O)c(O)cc(c2)O	TZBJGXHYKVUXJN-UHFFFAOYSA-N	investigational	0.00934642	Known	#N/A	aging
DB01645	Genistein	5280961	ESRRG	5280961	Oc1ccc(cc1)c1coc2c(c1=O)c(O)cc(c2)O	TZBJGXHYKVUXJN-UHFFFAOYSA-N	investigational	0.0138454	Known	#N/A	aging
DB01645	Genistein	5280961	HSD17B1	5280961	Oc1ccc(cc1)c1coc2c(c1=O)c(O)cc(c2)O	TZBJGXHYKVUXJN-UHFFFAOYSA-N	investigational	0.0086531	Known	#N/A	aging
DB01645	Genistein	5280961	MGAM	5280961	Oc1ccc(cc1)c1coc2c(c1=O)c(O)cc(c2)O	TZBJGXHYKVUXJN-UHFFFAOYSA-N	investigational	0.00864828	Known	#N/A	aging
DB01645	Genistein	5280961	NPC1	5280961	Oc1ccc(cc1)c1coc2c(c1=O)c(O)cc(c2)O	TZBJGXHYKVUXJN-UHFFFAOYSA-N	investigational	0.00845537	Known	#N/A	aging
DB01645	Genistein	5280961	RAB9A	5280961	Oc1ccc(cc1)c1coc2c(c1=O)c(O)cc(c2)O	TZBJGXHYKVUXJN-UHFFFAOYSA-N	investigational	0.00856745	Known	#N/A	aging
DB01645	Genistein	5280961	SLCO1B1	5280961	Oc1ccc(cc1)c1coc2c(c1=O)c(O)cc(c2)O	TZBJGXHYKVUXJN-UHFFFAOYSA-N	investigational	0.00791838	Known	#N/A	aging
DB01645	Genistein	5280961	SLCO1B3	5280961	Oc1ccc(cc1)c1coc2c(c1=O)c(O)cc(c2)O	TZBJGXHYKVUXJN-UHFFFAOYSA-N	investigational	0.00806312	Known	#N/A	aging
DB01645	Genistein	5280961	TBXAS1	5280961	Oc1ccc(cc1)c1coc2c(c1=O)c(O)cc(c2)O	TZBJGXHYKVUXJN-UHFFFAOYSA-N	investigational	0.010827	Known	#N/A	aging
DB01645	Genistein	5280961	TDP1	5280961	Oc1ccc(cc1)c1coc2c(c1=O)c(O)cc(c2)O	TZBJGXHYKVUXJN-UHFFFAOYSA-N	investigational	0.00637746	Known	#N/A	aging
DB01645	Genistein	5280961	THPO	5280961	Oc1ccc(cc1)c1coc2c(c1=O)c(O)cc(c2)O	TZBJGXHYKVUXJN-UHFFFAOYSA-N	investigational	0.00606233	Known	#N/A	aging
DB01645	Genistein	5280961	TSHR	5280961	Oc1ccc(cc1)c1coc2c(c1=O)c(O)cc(c2)O	TZBJGXHYKVUXJN-UHFFFAOYSA-N	investigational	0.00875662	Known	#N/A	aging
DB00143	Glutathione	25246407	LMNA	25246407	SC[C@@H](C(=O)NCC(=O)O)NC(=O)CC[C@@H](C(=O)O)N	RWSXRVCMGQZWBV-WDSKDSINSA-N	approved; nutraceutical	0.000454783	1	Homo sapiens	aging
DB00143	Glutathione	25246407	BLM	25246407	SC[C@@H](C(=O)NCC(=O)O)NC(=O)CC[C@@H](C(=O)O)N	RWSXRVCMGQZWBV-WDSKDSINSA-N	approved; nutraceutical	0.000247056	3	Homo sapiens	aging
DB00143	Glutathione	25246407	CNR1	25246407	SC[C@@H](C(=O)NCC(=O)O)NC(=O)CC[C@@H](C(=O)O)N	RWSXRVCMGQZWBV-WDSKDSINSA-N	approved; nutraceutical	0.000200874	4	Homo sapiens	aging
DB00143	Glutathione	25246407	TSHR	25246407	SC[C@@H](C(=O)NCC(=O)O)NC(=O)CC[C@@H](C(=O)O)N	RWSXRVCMGQZWBV-WDSKDSINSA-N	approved; nutraceutical	0.000273571	2	#N/A	aging
DB00143	Glutathione	25246407	GSTK1	25246407	SC[C@@H](C(=O)NCC(=O)O)NC(=O)CC[C@@H](C(=O)O)N	RWSXRVCMGQZWBV-WDSKDSINSA-N	approved; nutraceutical	0.169007	Known	#N/A	aging
DB01016	Glyburide	3488	MAPT	3488	COc1ccc(cc1C(=O)NCCc1ccc(cc1)S(=O)(=O)NC(=O)NC1CCCCC1)Cl	ZNNLBTZKUZBEKO-UHFFFAOYSA-N	approved	0.00653592	2	Homo sapiens	aging
DB01016	Glyburide	3488	LMNA	3488	COc1ccc(cc1C(=O)NCCc1ccc(cc1)S(=O)(=O)NC(=O)NC1CCCCC1)Cl	ZNNLBTZKUZBEKO-UHFFFAOYSA-N	approved	0.00653235	3	Homo sapiens	aging
DB01016	Glyburide	3488	TP53	3488	COc1ccc(cc1C(=O)NCCc1ccc(cc1)S(=O)(=O)NC(=O)NC1CCCCC1)Cl	ZNNLBTZKUZBEKO-UHFFFAOYSA-N	approved	0.00578613	4	Homo sapiens	aging
DB01016	Glyburide	3488	HIF1A	3488	COc1ccc(cc1C(=O)NCCc1ccc(cc1)S(=O)(=O)NC(=O)NC1CCCCC1)Cl	ZNNLBTZKUZBEKO-UHFFFAOYSA-N	approved	0.0117652	Known	Homo sapiens	aging
DB01016	Glyburide	3488	SLCO1B3	3488	COc1ccc(cc1C(=O)NCCc1ccc(cc1)S(=O)(=O)NC(=O)NC1CCCCC1)Cl	ZNNLBTZKUZBEKO-UHFFFAOYSA-N	approved	0.00934092	1	#N/A	aging
DB01016	Glyburide	3488	HSD17B10	3488	COc1ccc(cc1C(=O)NCCc1ccc(cc1)S(=O)(=O)NC(=O)NC1CCCCC1)Cl	ZNNLBTZKUZBEKO-UHFFFAOYSA-N	approved	0.00532724	5	#N/A	aging
DB01016	Glyburide	3488	ABCB11	3488	COc1ccc(cc1C(=O)NCCc1ccc(cc1)S(=O)(=O)NC(=O)NC1CCCCC1)Cl	ZNNLBTZKUZBEKO-UHFFFAOYSA-N	approved	0.0105438	Known	#N/A	aging
DB01016	Glyburide	3488	KMT2A	3488	COc1ccc(cc1C(=O)NCCc1ccc(cc1)S(=O)(=O)NC(=O)NC1CCCCC1)Cl	ZNNLBTZKUZBEKO-UHFFFAOYSA-N	approved	0.010901	Known	#N/A	aging
DB01016	Glyburide	3488	SLCO1B1	3488	COc1ccc(cc1C(=O)NCCc1ccc(cc1)S(=O)(=O)NC(=O)NC1CCCCC1)Cl	ZNNLBTZKUZBEKO-UHFFFAOYSA-N	approved	0.0105888	Known	#N/A	aging
DB01016	Glyburide	3488	TSHR	3488	COc1ccc(cc1C(=O)NCCc1ccc(cc1)S(=O)(=O)NC(=O)NC1CCCCC1)Cl	ZNNLBTZKUZBEKO-UHFFFAOYSA-N	approved	0.0169869	Known	#N/A	aging
DB04077	Glycerol	753	BLM	753	OCC(CO)O	PEDCQBHIVMGVHV-UHFFFAOYSA-N	experimental	0.00710419	2	Homo sapiens	aging
DB04077	Glycerol	753	HTT	753	OCC(CO)O	PEDCQBHIVMGVHV-UHFFFAOYSA-N	experimental	0.00612858	3	Homo sapiens	aging
DB04077	Glycerol	753	MAPT	753	OCC(CO)O	PEDCQBHIVMGVHV-UHFFFAOYSA-N	experimental	0.00555228	4	Homo sapiens	aging
DB04077	Glycerol	753	LMNA	753	OCC(CO)O	PEDCQBHIVMGVHV-UHFFFAOYSA-N	experimental	0.0596288	Known	Homo sapiens	aging
DB04077	Glycerol	753	TSHR	753	OCC(CO)O	PEDCQBHIVMGVHV-UHFFFAOYSA-N	experimental	0.00971702	1	#N/A	aging
DB04077	Glycerol	753	ALDH1A1	753	OCC(CO)O	PEDCQBHIVMGVHV-UHFFFAOYSA-N	experimental	0.00551773	5	#N/A	aging
DB06756	Glycine betaine	247	LMNA	247	[O-]C(=O)C[N+](C)(C)C	KWIUHFFTVRNATP-UHFFFAOYSA-N	approved; nutraceutical	0.0105839	1	Homo sapiens	aging
DB06756	Glycine betaine	247	TP53	247	[O-]C(=O)C[N+](C)(C)C	KWIUHFFTVRNATP-UHFFFAOYSA-N	approved; nutraceutical	0.0077423	2	Homo sapiens	aging
DB06756	Glycine betaine	247	NFKB1	247	[O-]C(=O)C[N+](C)(C)C	KWIUHFFTVRNATP-UHFFFAOYSA-N	approved; nutraceutical	0.00529523	5	Homo sapiens	aging
DB06756	Glycine betaine	247	LTA4H	247	[O-]C(=O)C[N+](C)(C)C	KWIUHFFTVRNATP-UHFFFAOYSA-N	approved; nutraceutical	0.00677107	3	#N/A	aging
DB06756	Glycine betaine	247	TBXAS1	247	[O-]C(=O)C[N+](C)(C)C	KWIUHFFTVRNATP-UHFFFAOYSA-N	approved; nutraceutical	0.00588918	4	#N/A	aging
DB06756	Glycine betaine	247	TSHR	247	[O-]C(=O)C[N+](C)(C)C	KWIUHFFTVRNATP-UHFFFAOYSA-N	approved; nutraceutical	0.118809	Known	#N/A	aging
DB02109	Hadacidin	12717	LMNA	12717	O=CN(CC(=O)O)O	URJHVPKUWOUENU-UHFFFAOYSA-N	experimental	0.000468402	1	Homo sapiens	aging
DB02109	Hadacidin	12717	MAPT	12717	O=CN(CC(=O)O)O	URJHVPKUWOUENU-UHFFFAOYSA-N	experimental	0.000294282	3	Homo sapiens	aging
DB02109	Hadacidin	12717	TSHR	12717	O=CN(CC(=O)O)O	URJHVPKUWOUENU-UHFFFAOYSA-N	experimental	0.000416041	2	#N/A	aging
DB02109	Hadacidin	12717	ALDH1A1	12717	O=CN(CC(=O)O)O	URJHVPKUWOUENU-UHFFFAOYSA-N	experimental	0.000287467	4	#N/A	aging
DB02109	Hadacidin	12717	TDP1	12717	O=CN(CC(=O)O)O	URJHVPKUWOUENU-UHFFFAOYSA-N	experimental	0.00027737	5	#N/A	aging
DB02109	Hadacidin	12717	ADSS	12717	O=CN(CC(=O)O)O	URJHVPKUWOUENU-UHFFFAOYSA-N	experimental	0.518892	Known	#N/A	aging
DB01094	Hesperetin	72281	MAPT	72281	COc1ccc(cc1O)[C@@H]1CC(=O)c2c(O1)cc(cc2O)O	AIONOLUJZLIMTK-AWEZNQCLSA-N	approved	0.00701935	2	Homo sapiens	aging
DB01094	Hesperetin	72281	LMNA	72281	COc1ccc(cc1O)[C@@H]1CC(=O)c2c(O1)cc(cc2O)O	AIONOLUJZLIMTK-AWEZNQCLSA-N	approved	0.00633706	3	Homo sapiens	aging
DB01094	Hesperetin	72281	TP53	72281	COc1ccc(cc1O)[C@@H]1CC(=O)c2c(O1)cc(cc2O)O	AIONOLUJZLIMTK-AWEZNQCLSA-N	approved	0.00580742	4	Homo sapiens	aging
DB01094	Hesperetin	72281	NFKB1	72281	COc1ccc(cc1O)[C@@H]1CC(=O)c2c(O1)cc(cc2O)O	AIONOLUJZLIMTK-AWEZNQCLSA-N	approved	0.00476669	5	Homo sapiens	aging
DB01094	Hesperetin	72281	HIF1A	72281	COc1ccc(cc1O)[C@@H]1CC(=O)c2c(O1)cc(cc2O)O	AIONOLUJZLIMTK-AWEZNQCLSA-N	approved	0.00983972	Known	Homo sapiens	aging
DB01094	Hesperetin	72281	MAPK1	72281	COc1ccc(cc1O)[C@@H]1CC(=O)c2c(O1)cc(cc2O)O	AIONOLUJZLIMTK-AWEZNQCLSA-N	approved	0.0134656	Known	homologous analysis	aging
DB01094	Hesperetin	72281	NPC1	72281	COc1ccc(cc1O)[C@@H]1CC(=O)c2c(O1)cc(cc2O)O	AIONOLUJZLIMTK-AWEZNQCLSA-N	approved	0.0140585	Known	#N/A	aging
DB01094	Hesperetin	72281	RAB9A	72281	COc1ccc(cc1O)[C@@H]1CC(=O)c2c(O1)cc(cc2O)O	AIONOLUJZLIMTK-AWEZNQCLSA-N	approved	0.0143172	Known	#N/A	aging
DB01094	Hesperetin	72281	TSHR	72281	COc1ccc(cc1O)[C@@H]1CC(=O)c2c(O1)cc(cc2O)O	AIONOLUJZLIMTK-AWEZNQCLSA-N	approved	0.0143132	Known	#N/A	aging
DB04865	Homoharringtonine	3628|72332	LMNA	3628|72332	COC(=O)CC(C(=O)OC1C(=CC23C1c1cc4OCOc4cc1CCN3CCC2)OC)(CCCC(O)(C)C)O	HYFHYPWGAURHIV-UHFFFAOYSA-N|HYFHYPWGAURHIV-ZEDNPHJLSA-N	approved	0.016523	1	Homo sapiens	aging
DB04865	Homoharringtonine	3628|72332	JAK2	3628|72332	COC(=O)CC(C(=O)OC1C(=CC23C1c1cc4OCOc4cc1CCN3CCC2)OC)(CCCC(O)(C)C)O	HYFHYPWGAURHIV-UHFFFAOYSA-N|HYFHYPWGAURHIV-ZEDNPHJLSA-N	approved	0.0104343	2	Homo sapiens	aging
DB04865	Homoharringtonine	3628|72332	HIF1A	3628|72332	COC(=O)CC(C(=O)OC1C(=CC23C1c1cc4OCOc4cc1CCN3CCC2)OC)(CCCC(O)(C)C)O	HYFHYPWGAURHIV-UHFFFAOYSA-N|HYFHYPWGAURHIV-ZEDNPHJLSA-N	approved	0.00700694	4	Homo sapiens	aging
DB04865	Homoharringtonine	3628|72332	HTT	3628|72332	COC(=O)CC(C(=O)OC1C(=CC23C1c1cc4OCOc4cc1CCN3CCC2)OC)(CCCC(O)(C)C)O	HYFHYPWGAURHIV-UHFFFAOYSA-N|HYFHYPWGAURHIV-ZEDNPHJLSA-N	approved	0.113849	Known	Homo sapiens	aging
DB04865	Homoharringtonine	3628|72332	S1PR1	3628|72332	COC(=O)CC(C(=O)OC1C(=CC23C1c1cc4OCOc4cc1CCN3CCC2)OC)(CCCC(O)(C)C)O	HYFHYPWGAURHIV-UHFFFAOYSA-N|HYFHYPWGAURHIV-ZEDNPHJLSA-N	approved	0.0103828	3	#N/A	aging
DB04865	Homoharringtonine	3628|72332	KCNN3	3628|72332	COC(=O)CC(C(=O)OC1C(=CC23C1c1cc4OCOc4cc1CCN3CCC2)OC)(CCCC(O)(C)C)O	HYFHYPWGAURHIV-UHFFFAOYSA-N|HYFHYPWGAURHIV-ZEDNPHJLSA-N	approved	0.00631175	5	#N/A	aging
DB01928	Huperaine A	854026	LMNA	854026	C/C=C/1\[C@H]2C=C(C[C@]1(N)c1c(C2)[nH]c(=O)cc1)C	ZRJBHWIHUMBLCN-YQEJDHNASA-N	experimental	0.00885912	3	Homo sapiens	aging
DB01928	Huperaine A	854026	TOP1	854026	C/C=C/1\[C@H]2C=C(C[C@]1(N)c1c(C2)[nH]c(=O)cc1)C	ZRJBHWIHUMBLCN-YQEJDHNASA-N	experimental	0.00636938	4	Homo sapiens	aging
DB01928	Huperaine A	854026	BCHE	854026	C/C=C/1\[C@H]2C=C(C[C@]1(N)c1c(C2)[nH]c(=O)cc1)C	ZRJBHWIHUMBLCN-YQEJDHNASA-N	experimental	0.0331352	1	#N/A	aging
DB01928	Huperaine A	854026	GDA	854026	C/C=C/1\[C@H]2C=C(C[C@]1(N)c1c(C2)[nH]c(=O)cc1)C	ZRJBHWIHUMBLCN-YQEJDHNASA-N	experimental	0.0101572	2	#N/A	aging
DB01928	Huperaine A	854026	ADORA2A	854026	C/C=C/1\[C@H]2C=C(C[C@]1(N)c1c(C2)[nH]c(=O)cc1)C	ZRJBHWIHUMBLCN-YQEJDHNASA-N	experimental	0.00632798	5	#N/A	aging
DB01928	Huperaine A	854026	ACHE	854026	C/C=C/1\[C@H]2C=C(C[C@]1(N)c1c(C2)[nH]c(=O)cc1)C	ZRJBHWIHUMBLCN-YQEJDHNASA-N	experimental	0.151126	Known	#N/A	aging
DB04864	Huperzine A	5912039	LMNA	5912039	C/C=C/1\C2C=C(CC1(N)c1c(C2)[nH]c(=O)cc1)C	ZRJBHWIHUMBLCN-QDEBKDIKSA-N	investigational	0.00885912	3	Homo sapiens	aging
DB04864	Huperzine A	5912039	TOP1	5912039	C/C=C/1\C2C=C(CC1(N)c1c(C2)[nH]c(=O)cc1)C	ZRJBHWIHUMBLCN-QDEBKDIKSA-N	investigational	0.00636938	4	Homo sapiens	aging
DB04864	Huperzine A	5912039	BCHE	5912039	C/C=C/1\C2C=C(CC1(N)c1c(C2)[nH]c(=O)cc1)C	ZRJBHWIHUMBLCN-QDEBKDIKSA-N	investigational	0.0331352	1	#N/A	aging
DB04864	Huperzine A	5912039	GDA	5912039	C/C=C/1\C2C=C(CC1(N)c1c(C2)[nH]c(=O)cc1)C	ZRJBHWIHUMBLCN-QDEBKDIKSA-N	investigational	0.0101572	2	#N/A	aging
DB04864	Huperzine A	5912039	ADORA2A	5912039	C/C=C/1\C2C=C(CC1(N)c1c(C2)[nH]c(=O)cc1)C	ZRJBHWIHUMBLCN-QDEBKDIKSA-N	investigational	0.00632798	5	#N/A	aging
DB04864	Huperzine A	5912039	ACHE	5912039	C/C=C/1\C2C=C(CC1(N)c1c(C2)[nH]c(=O)cc1)C	ZRJBHWIHUMBLCN-QDEBKDIKSA-N	investigational	0.151126	Known	#N/A	aging
DB01275	Hydralazine	3637	MAPT	3637	NNc1nncc2c1cccc2	RPTUSVTUFVMDQK-UHFFFAOYSA-N	approved	0.00906562	1	Homo sapiens	aging
DB01275	Hydralazine	3637	NFKB1	3637	NNc1nncc2c1cccc2	RPTUSVTUFVMDQK-UHFFFAOYSA-N	approved	0.00670225	3	Homo sapiens	aging
DB01275	Hydralazine	3637	LMNA	3637	NNc1nncc2c1cccc2	RPTUSVTUFVMDQK-UHFFFAOYSA-N	approved	0.0144364	Known	Homo sapiens	aging
DB01275	Hydralazine	3637	TP53	3637	NNc1nncc2c1cccc2	RPTUSVTUFVMDQK-UHFFFAOYSA-N	approved	0.0193059	Known	Homo sapiens	aging
DB01275	Hydralazine	3637	HSD17B10	3637	NNc1nncc2c1cccc2	RPTUSVTUFVMDQK-UHFFFAOYSA-N	approved	0.00718157	2	#N/A	aging
DB01275	Hydralazine	3637	TSHR	3637	NNc1nncc2c1cccc2	RPTUSVTUFVMDQK-UHFFFAOYSA-N	approved	0.00630215	4	#N/A	aging
DB01275	Hydralazine	3637	ALDH1A1	3637	NNc1nncc2c1cccc2	RPTUSVTUFVMDQK-UHFFFAOYSA-N	approved	0.0164947	Known	#N/A	aging
DB01275	Hydralazine	3637	NPC1	3637	NNc1nncc2c1cccc2	RPTUSVTUFVMDQK-UHFFFAOYSA-N	approved	0.0190641	Known	#N/A	aging
DB01275	Hydralazine	3637	PKM	3637	NNc1nncc2c1cccc2	RPTUSVTUFVMDQK-UHFFFAOYSA-N	approved	0.0194452	Known	#N/A	aging
DB01275	Hydralazine	3637	RAB9A	3637	NNc1nncc2c1cccc2	RPTUSVTUFVMDQK-UHFFFAOYSA-N	approved	0.0192053	Known	#N/A	aging
DB01275	Hydralazine	3637	SMN1	3637	NNc1nncc2c1cccc2	RPTUSVTUFVMDQK-UHFFFAOYSA-N	approved	0.0132654	Known	#N/A	aging
DB01275	Hydralazine	3637	THPO	3637	NNc1nncc2c1cccc2	RPTUSVTUFVMDQK-UHFFFAOYSA-N	approved	0.0156529	Known	#N/A	aging
DB09526	Hydroquinone	785	BLM	785	Oc1ccc(cc1)O	QIGBRXMKCJKVMJ-UHFFFAOYSA-N	approved	0.00893474	Known	Homo sapiens	aging
DB09526	Hydroquinone	785	HIF1A	785	Oc1ccc(cc1)O	QIGBRXMKCJKVMJ-UHFFFAOYSA-N	approved	0.00947606	Known	Homo sapiens	aging
DB09526	Hydroquinone	785	LMNA	785	Oc1ccc(cc1)O	QIGBRXMKCJKVMJ-UHFFFAOYSA-N	approved	0.0112702	Known	Homo sapiens	aging
DB09526	Hydroquinone	785	MAPT	785	Oc1ccc(cc1)O	QIGBRXMKCJKVMJ-UHFFFAOYSA-N	approved	0.0111894	Known	Homo sapiens	aging
DB09526	Hydroquinone	785	NFKB1	785	Oc1ccc(cc1)O	QIGBRXMKCJKVMJ-UHFFFAOYSA-N	approved	0.0112132	Known	Homo sapiens	aging
DB09526	Hydroquinone	785	CA9	785	Oc1ccc(cc1)O	QIGBRXMKCJKVMJ-UHFFFAOYSA-N	approved	0.012251	1	#N/A	aging
DB09526	Hydroquinone	785	CA1	785	Oc1ccc(cc1)O	QIGBRXMKCJKVMJ-UHFFFAOYSA-N	approved	0.0120709	2	#N/A	aging
DB09526	Hydroquinone	785	CA7	785	Oc1ccc(cc1)O	QIGBRXMKCJKVMJ-UHFFFAOYSA-N	approved	0.010353	3	#N/A	aging
DB09526	Hydroquinone	785	CA14	785	Oc1ccc(cc1)O	QIGBRXMKCJKVMJ-UHFFFAOYSA-N	approved	0.00921801	4	#N/A	aging
DB09526	Hydroquinone	785	CA5A	785	Oc1ccc(cc1)O	QIGBRXMKCJKVMJ-UHFFFAOYSA-N	approved	0.00719724	5	#N/A	aging
DB09526	Hydroquinone	785	CA12	785	Oc1ccc(cc1)O	QIGBRXMKCJKVMJ-UHFFFAOYSA-N	approved	0.0155802	Known	#N/A	aging
DB09526	Hydroquinone	785	CA2	785	Oc1ccc(cc1)O	QIGBRXMKCJKVMJ-UHFFFAOYSA-N	approved	0.0150168	Known	#N/A	aging
DB09526	Hydroquinone	785	CA3	785	Oc1ccc(cc1)O	QIGBRXMKCJKVMJ-UHFFFAOYSA-N	approved	0.0151951	Known	#N/A	aging
DB09526	Hydroquinone	785	HPGD	785	Oc1ccc(cc1)O	QIGBRXMKCJKVMJ-UHFFFAOYSA-N	approved	0.0137716	Known	#N/A	aging
DB09526	Hydroquinone	785	HSD17B10	785	Oc1ccc(cc1)O	QIGBRXMKCJKVMJ-UHFFFAOYSA-N	approved	0.0141426	Known	#N/A	aging
DB09526	Hydroquinone	785	KMT2A	785	Oc1ccc(cc1)O	QIGBRXMKCJKVMJ-UHFFFAOYSA-N	approved	0.0096025	Known	#N/A	aging
DB00159	Icosapent	446284	PPARA	446284	CC/C=C\C/C=C\C/C=C\C/C=C\C/C=C\CCCC(=O)O	JAZBEHYOTPTENJ-JLNKQSITSA-N	approved; nutraceutical	0.0804013	Known	Homo sapiens	aging
DB00159	Icosapent	446284	PPARG	446284	CC/C=C\C/C=C\C/C=C\C/C=C\C/C=C\CCCC(=O)O	JAZBEHYOTPTENJ-JLNKQSITSA-N	approved; nutraceutical	0.0705523	Known	Homo sapiens	aging
DB00159	Icosapent	446284	FABP4	446284	CC/C=C\C/C=C\C/C=C\C/C=C\C/C=C\CCCC(=O)O	JAZBEHYOTPTENJ-JLNKQSITSA-N	approved; nutraceutical	0.015201	1	homologous analysis	aging
DB00159	Icosapent	446284	FABP5	446284	CC/C=C\C/C=C\C/C=C\C/C=C\C/C=C\CCCC(=O)O	JAZBEHYOTPTENJ-JLNKQSITSA-N	approved; nutraceutical	0.0093361	2	homologous analysis	aging
DB00159	Icosapent	446284	TLR2	446284	CC/C=C\C/C=C\C/C=C\C/C=C\C/C=C\CCCC(=O)O	JAZBEHYOTPTENJ-JLNKQSITSA-N	approved; nutraceutical	0.00843227	3	#N/A	aging
DB00159	Icosapent	446284	FFAR4	446284	CC/C=C\C/C=C\C/C=C\C/C=C\C/C=C\CCCC(=O)O	JAZBEHYOTPTENJ-JLNKQSITSA-N	approved; nutraceutical	0.00753018	4	#N/A	aging
DB00159	Icosapent	446284	FFAR1	446284	CC/C=C\C/C=C\C/C=C\C/C=C\C/C=C\CCCC(=O)O	JAZBEHYOTPTENJ-JLNKQSITSA-N	approved; nutraceutical	0.00753018	5	#N/A	aging
DB00159	Icosapent	446284	OXER1	446284	CC/C=C\C/C=C\C/C=C\C/C=C\C/C=C\CCCC(=O)O	JAZBEHYOTPTENJ-JLNKQSITSA-N	approved; nutraceutical	0.0989911	Known	#N/A	aging
DB00159	Icosapent	446284	PPARD	446284	CC/C=C\C/C=C\C/C=C\C/C=C\C/C=C\CCCC(=O)O	JAZBEHYOTPTENJ-JLNKQSITSA-N	approved; nutraceutical	0.0704565	Known	#N/A	aging
DB04335	Inosine	6021	TP53	6021	OC[C@H]1O[C@H]([C@@H]([C@@H]1O)O)n1cnc2c1nc[nH]c2=O	UGQMRVRMYYASKQ-KQYNXXCUSA-N	investigational	0.00875234	2	Homo sapiens	aging
DB04335	Inosine	6021	MAPT	6021	OC[C@H]1O[C@H]([C@@H]([C@@H]1O)O)n1cnc2c1nc[nH]c2=O	UGQMRVRMYYASKQ-KQYNXXCUSA-N	investigational	0.00735198	3	Homo sapiens	aging
DB04335	Inosine	6021	LMNA	6021	OC[C@H]1O[C@H]([C@@H]([C@@H]1O)O)n1cnc2c1nc[nH]c2=O	UGQMRVRMYYASKQ-KQYNXXCUSA-N	investigational	0.00672805	4	Homo sapiens	aging
DB04335	Inosine	6021	PARP1	6021	OC[C@H]1O[C@H]([C@@H]([C@@H]1O)O)n1cnc2c1nc[nH]c2=O	UGQMRVRMYYASKQ-KQYNXXCUSA-N	investigational	0.00571178	5	Homo sapiens	aging
DB04335	Inosine	6021	SMN1	6021	OC[C@H]1O[C@H]([C@@H]([C@@H]1O)O)n1cnc2c1nc[nH]c2=O	UGQMRVRMYYASKQ-KQYNXXCUSA-N	investigational	0.0638802	Known	#N/A	aging
DB02325	Isopropyl alcohol	3776	BLM	3776	CC(O)C	KFZMGEQAYNKOFK-UHFFFAOYSA-N	approved	0.00709432	2	Homo sapiens	aging
DB02325	Isopropyl alcohol	3776	HTT	3776	CC(O)C	KFZMGEQAYNKOFK-UHFFFAOYSA-N	approved	0.0061411	3	Homo sapiens	aging
DB02325	Isopropyl alcohol	3776	MAPT	3776	CC(O)C	KFZMGEQAYNKOFK-UHFFFAOYSA-N	approved	0.00563094	4	Homo sapiens	aging
DB02325	Isopropyl alcohol	3776	LMNA	3776	CC(O)C	KFZMGEQAYNKOFK-UHFFFAOYSA-N	approved	0.0594178	Known	Homo sapiens	aging
DB02325	Isopropyl alcohol	3776	TSHR	3776	CC(O)C	KFZMGEQAYNKOFK-UHFFFAOYSA-N	approved	0.00989294	1	#N/A	aging
DB02325	Isopropyl alcohol	3776	ALDH1A1	3776	CC(O)C	KFZMGEQAYNKOFK-UHFFFAOYSA-N	approved	0.00557476	5	#N/A	aging
DB01852	Kaempherol	5280863	NR3C1	5280863	Oc1ccc(cc1)c1oc2cc(O)cc(c2c(=O)c1O)O	IYRMWMYZSQPJKC-UHFFFAOYSA-N	experimental	0.00800675	1	Homo sapiens	aging
DB01852	Kaempherol	5280863	MAPT	5280863	Oc1ccc(cc1)c1oc2cc(O)cc(c2c(=O)c1O)O	IYRMWMYZSQPJKC-UHFFFAOYSA-N	experimental	0.00534497	2	Homo sapiens	aging
DB01852	Kaempherol	5280863	AR	5280863	Oc1ccc(cc1)c1oc2cc(O)cc(c2c(=O)c1O)O	IYRMWMYZSQPJKC-UHFFFAOYSA-N	experimental	0.0103129	Known	Homo sapiens	aging
DB01852	Kaempherol	5280863	HIF1A	5280863	Oc1ccc(cc1)c1oc2cc(O)cc(c2c(=O)c1O)O	IYRMWMYZSQPJKC-UHFFFAOYSA-N	experimental	0.0072808	Known	Homo sapiens	aging
DB01852	Kaempherol	5280863	LMNA	5280863	Oc1ccc(cc1)c1oc2cc(O)cc(c2c(=O)c1O)O	IYRMWMYZSQPJKC-UHFFFAOYSA-N	experimental	0.00533385	Known	Homo sapiens	aging
DB01852	Kaempherol	5280863	TP53	5280863	Oc1ccc(cc1)c1oc2cc(O)cc(c2c(=O)c1O)O	IYRMWMYZSQPJKC-UHFFFAOYSA-N	experimental	0.00804799	Known	Homo sapiens	aging
DB01852	Kaempherol	5280863	MAPK10	5280863	Oc1ccc(cc1)c1oc2cc(O)cc(c2c(=O)c1O)O	IYRMWMYZSQPJKC-UHFFFAOYSA-N	experimental	0.00479655	3	homologous analysis	aging
DB01852	Kaempherol	5280863	CBR1	5280863	Oc1ccc(cc1)c1oc2cc(O)cc(c2c(=O)c1O)O	IYRMWMYZSQPJKC-UHFFFAOYSA-N	experimental	0.00451783	4	#N/A	aging
DB01852	Kaempherol	5280863	HSD17B10	5280863	Oc1ccc(cc1)c1oc2cc(O)cc(c2c(=O)c1O)O	IYRMWMYZSQPJKC-UHFFFAOYSA-N	experimental	0.0042136	5	#N/A	aging
DB01852	Kaempherol	5280863	ABCB1	5280863	Oc1ccc(cc1)c1oc2cc(O)cc(c2c(=O)c1O)O	IYRMWMYZSQPJKC-UHFFFAOYSA-N	experimental	0.00961463	Known	#N/A	aging
DB01852	Kaempherol	5280863	ABCC1	5280863	Oc1ccc(cc1)c1oc2cc(O)cc(c2c(=O)c1O)O	IYRMWMYZSQPJKC-UHFFFAOYSA-N	experimental	0.011888	Known	#N/A	aging
DB01852	Kaempherol	5280863	ABCG2	5280863	Oc1ccc(cc1)c1oc2cc(O)cc(c2c(=O)c1O)O	IYRMWMYZSQPJKC-UHFFFAOYSA-N	experimental	0.0100588	Known	#N/A	aging
DB01852	Kaempherol	5280863	AHR	5280863	Oc1ccc(cc1)c1oc2cc(O)cc(c2c(=O)c1O)O	IYRMWMYZSQPJKC-UHFFFAOYSA-N	experimental	0.0160627	Known	#N/A	aging
DB01852	Kaempherol	5280863	AKR1B1	5280863	Oc1ccc(cc1)c1oc2cc(O)cc(c2c(=O)c1O)O	IYRMWMYZSQPJKC-UHFFFAOYSA-N	experimental	0.00650966	Known	#N/A	aging
DB01852	Kaempherol	5280863	ALOX15	5280863	Oc1ccc(cc1)c1oc2cc(O)cc(c2c(=O)c1O)O	IYRMWMYZSQPJKC-UHFFFAOYSA-N	experimental	0.00716994	Known	#N/A	aging
DB01852	Kaempherol	5280863	ALOX5	5280863	Oc1ccc(cc1)c1oc2cc(O)cc(c2c(=O)c1O)O	IYRMWMYZSQPJKC-UHFFFAOYSA-N	experimental	0.00712151	Known	#N/A	aging
DB01852	Kaempherol	5280863	CTDSP1	5280863	Oc1ccc(cc1)c1oc2cc(O)cc(c2c(=O)c1O)O	IYRMWMYZSQPJKC-UHFFFAOYSA-N	experimental	0.0105899	Known	#N/A	aging
DB01852	Kaempherol	5280863	ESRRA	5280863	Oc1ccc(cc1)c1oc2cc(O)cc(c2c(=O)c1O)O	IYRMWMYZSQPJKC-UHFFFAOYSA-N	experimental	0.00607633	Known	#N/A	aging
DB01852	Kaempherol	5280863	FLT3	5280863	Oc1ccc(cc1)c1oc2cc(O)cc(c2c(=O)c1O)O	IYRMWMYZSQPJKC-UHFFFAOYSA-N	experimental	0.00719439	Known	#N/A	aging
DB01852	Kaempherol	5280863	HSD17B1	5280863	Oc1ccc(cc1)c1oc2cc(O)cc(c2c(=O)c1O)O	IYRMWMYZSQPJKC-UHFFFAOYSA-N	experimental	0.00863587	Known	#N/A	aging
DB01852	Kaempherol	5280863	HSD17B2	5280863	Oc1ccc(cc1)c1oc2cc(O)cc(c2c(=O)c1O)O	IYRMWMYZSQPJKC-UHFFFAOYSA-N	experimental	0.00744748	Known	#N/A	aging
DB01852	Kaempherol	5280863	NOX4	5280863	Oc1ccc(cc1)c1oc2cc(O)cc(c2c(=O)c1O)O	IYRMWMYZSQPJKC-UHFFFAOYSA-N	experimental	0.0128026	Known	#N/A	aging
DB01852	Kaempherol	5280863	PIM1	5280863	Oc1ccc(cc1)c1oc2cc(O)cc(c2c(=O)c1O)O	IYRMWMYZSQPJKC-UHFFFAOYSA-N	experimental	0.00952616	Known	#N/A	aging
DB01852	Kaempherol	5280863	TDP1	5280863	Oc1ccc(cc1)c1oc2cc(O)cc(c2c(=O)c1O)O	IYRMWMYZSQPJKC-UHFFFAOYSA-N	experimental	0.00726453	Known	#N/A	aging
DB01852	Kaempherol	5280863	XDH	5280863	Oc1ccc(cc1)c1oc2cc(O)cc(c2c(=O)c1O)O	IYRMWMYZSQPJKC-UHFFFAOYSA-N	experimental	0.00987071	Known	#N/A	aging
DB04398	Lactic acid	612	MAPT	612	OC(=O)C(O)C	JVTAAEKCZFNVCJ-UHFFFAOYSA-N	approved; vet_approved	0.015071	1	Homo sapiens	aging
DB04398	Lactic acid	612	TP53	612	OC(=O)C(O)C	JVTAAEKCZFNVCJ-UHFFFAOYSA-N	approved; vet_approved	0.0999096	Known	Homo sapiens	aging
DB04398	Lactic acid	612	TSHR	612	OC(=O)C(O)C	JVTAAEKCZFNVCJ-UHFFFAOYSA-N	approved; vet_approved	0.0113204	2	#N/A	aging
DB04398	Lactic acid	612	HPGD	612	OC(=O)C(O)C	JVTAAEKCZFNVCJ-UHFFFAOYSA-N	approved; vet_approved	0.0107765	3	#N/A	aging
DB04398	Lactic acid	612	TBXAS1	612	OC(=O)C(O)C	JVTAAEKCZFNVCJ-UHFFFAOYSA-N	approved; vet_approved	0.00964085	4	#N/A	aging
DB04398	Lactic acid	612	ALOX15	612	OC(=O)C(O)C	JVTAAEKCZFNVCJ-UHFFFAOYSA-N	approved; vet_approved	0.00924481	5	#N/A	aging
DB00128	L-Aspartic acid	44367445	LMNA	44367445	OC(=O)C[C@@H](C(=O)O)N	CKLJMWTZIZZHCS-REOHCLBHSA-N	approved; nutraceutical	0.012119	1	Homo sapiens	aging
DB00128	L-Aspartic acid	44367445	MAPT	44367445	OC(=O)C[C@@H](C(=O)O)N	CKLJMWTZIZZHCS-REOHCLBHSA-N	approved; nutraceutical	0.00963924	2	Homo sapiens	aging
DB00128	L-Aspartic acid	44367445	BLM	44367445	OC(=O)C[C@@H](C(=O)O)N	CKLJMWTZIZZHCS-REOHCLBHSA-N	approved; nutraceutical	0.0347627	Known	Homo sapiens	aging
DB00128	L-Aspartic acid	44367445	HSD17B10	44367445	OC(=O)C[C@@H](C(=O)O)N	CKLJMWTZIZZHCS-REOHCLBHSA-N	approved; nutraceutical	0.00924836	3	#N/A	aging
DB00128	L-Aspartic acid	44367445	TDP1	44367445	OC(=O)C[C@@H](C(=O)O)N	CKLJMWTZIZZHCS-REOHCLBHSA-N	approved; nutraceutical	0.00869465	4	#N/A	aging
DB00128	L-Aspartic acid	44367445	HPGD	44367445	OC(=O)C[C@@H](C(=O)O)N	CKLJMWTZIZZHCS-REOHCLBHSA-N	approved; nutraceutical	0.00852371	5	#N/A	aging
DB00128	L-Aspartic acid	44367445	ALDH1A1	44367445	OC(=O)C[C@@H](C(=O)O)N	CKLJMWTZIZZHCS-REOHCLBHSA-N	approved; nutraceutical	0.0499043	Known	#N/A	aging
DB00130	L-Glutamine	5961	LMNA	5961	NC(=O)CC[C@@H](C(=O)O)N	ZDXPYRJPNDTMRX-VKHMYHEASA-N	approved; investigational; nutraceutical	0.0165976	1	Homo sapiens	aging
DB00130	L-Glutamine	5961	APEX1	5961	NC(=O)CC[C@@H](C(=O)O)N	ZDXPYRJPNDTMRX-VKHMYHEASA-N	approved; investigational; nutraceutical	0.0125607	2	Homo sapiens	aging
DB00130	L-Glutamine	5961	MAPT	5961	NC(=O)CC[C@@H](C(=O)O)N	ZDXPYRJPNDTMRX-VKHMYHEASA-N	approved; investigational; nutraceutical	0.00888778	5	Homo sapiens	aging
DB00130	L-Glutamine	5961	BLM	5961	NC(=O)CC[C@@H](C(=O)O)N	ZDXPYRJPNDTMRX-VKHMYHEASA-N	approved; investigational; nutraceutical	0.0678818	Known	Homo sapiens	aging
DB00130	L-Glutamine	5961	RECQL	5961	NC(=O)CC[C@@H](C(=O)O)N	ZDXPYRJPNDTMRX-VKHMYHEASA-N	approved; investigational; nutraceutical	0.012038	3	#N/A	aging
DB00130	L-Glutamine	5961	PMP22	5961	NC(=O)CC[C@@H](C(=O)O)N	ZDXPYRJPNDTMRX-VKHMYHEASA-N	approved; investigational; nutraceutical	0.0102138	4	#N/A	aging
DB00279	Liothyronine	7048703	MAPT	7048703	[O-]C(=O)[C@H](Cc1cc(I)c(c(c1)I)Oc1ccc(c(c1)I)O)[NH3+]	AUYYCJSJGJYCDS-LBPRGKRZSA-N	approved; vet_approved	0.00658472	1	Homo sapiens	aging
DB00279	Liothyronine	7048703	BLM	7048703	[O-]C(=O)[C@H](Cc1cc(I)c(c(c1)I)Oc1ccc(c(c1)I)O)[NH3+]	AUYYCJSJGJYCDS-LBPRGKRZSA-N	approved; vet_approved	0.00439405	3	Homo sapiens	aging
DB00279	Liothyronine	7048703	LMNA	7048703	[O-]C(=O)[C@H](Cc1cc(I)c(c(c1)I)Oc1ccc(c(c1)I)O)[NH3+]	AUYYCJSJGJYCDS-LBPRGKRZSA-N	approved; vet_approved	0.0170114	Known	Homo sapiens	aging
DB00279	Liothyronine	7048703	PCNA	7048703	[O-]C(=O)[C@H](Cc1cc(I)c(c(c1)I)Oc1ccc(c(c1)I)O)[NH3+]	AUYYCJSJGJYCDS-LBPRGKRZSA-N	approved; vet_approved	0.065537	Known	Homo sapiens	aging
DB00279	Liothyronine	7048703	KDM4E	7048703	[O-]C(=O)[C@H](Cc1cc(I)c(c(c1)I)Oc1ccc(c(c1)I)O)[NH3+]	AUYYCJSJGJYCDS-LBPRGKRZSA-N	approved; vet_approved	0.00614452	2	#N/A	aging
DB00279	Liothyronine	7048703	USP2	7048703	[O-]C(=O)[C@H](Cc1cc(I)c(c(c1)I)Oc1ccc(c(c1)I)O)[NH3+]	AUYYCJSJGJYCDS-LBPRGKRZSA-N	approved; vet_approved	0.00403157	4	#N/A	aging
DB00279	Liothyronine	7048703	RAB9A	7048703	[O-]C(=O)[C@H](Cc1cc(I)c(c(c1)I)Oc1ccc(c(c1)I)O)[NH3+]	AUYYCJSJGJYCDS-LBPRGKRZSA-N	approved; vet_approved	0.00378339	5	#N/A	aging
DB00279	Liothyronine	7048703	KMT2A	7048703	[O-]C(=O)[C@H](Cc1cc(I)c(c(c1)I)Oc1ccc(c(c1)I)O)[NH3+]	AUYYCJSJGJYCDS-LBPRGKRZSA-N	approved; vet_approved	0.0206607	Known	#N/A	aging
DB00279	Liothyronine	7048703	NPSR1	7048703	[O-]C(=O)[C@H](Cc1cc(I)c(c(c1)I)Oc1ccc(c(c1)I)O)[NH3+]	AUYYCJSJGJYCDS-LBPRGKRZSA-N	approved; vet_approved	0.0282917	Known	#N/A	aging
DB00279	Liothyronine	7048703	THRA	7048703	[O-]C(=O)[C@H](Cc1cc(I)c(c(c1)I)Oc1ccc(c(c1)I)O)[NH3+]	AUYYCJSJGJYCDS-LBPRGKRZSA-N	approved; vet_approved	0.0731602	Known	#N/A	aging
DB00279	Liothyronine	7048703	THRB	7048703	[O-]C(=O)[C@H](Cc1cc(I)c(c(c1)I)Oc1ccc(c(c1)I)O)[NH3+]	AUYYCJSJGJYCDS-LBPRGKRZSA-N	approved; vet_approved	0.0368888	Known	#N/A	aging
DB00166	Lipoic acid	864	UBE2I	864	OC(=O)CCCCC1SSCC1	AGBQKNBQESQNJD-UHFFFAOYSA-N	approved; nutraceutical	0.0206084	1	Homo sapiens	aging
DB00166	Lipoic acid	864	BLM	864	OC(=O)CCCCC1SSCC1	AGBQKNBQESQNJD-UHFFFAOYSA-N	approved; nutraceutical	0.00855863	5	Homo sapiens	aging
DB00166	Lipoic acid	864	APEX1	864	OC(=O)CCCCC1SSCC1	AGBQKNBQESQNJD-UHFFFAOYSA-N	approved; nutraceutical	0.0268994	Known	Homo sapiens	aging
DB00166	Lipoic acid	864	POLB	864	OC(=O)CCCCC1SSCC1	AGBQKNBQESQNJD-UHFFFAOYSA-N	approved; nutraceutical	0.0243546	Known	Homo sapiens	aging
DB00166	Lipoic acid	864	PSIP1	864	OC(=O)CCCCC1SSCC1	AGBQKNBQESQNJD-UHFFFAOYSA-N	approved; nutraceutical	0.0124767	2	#N/A	aging
DB00166	Lipoic acid	864	MCL1	864	OC(=O)CCCCC1SSCC1	AGBQKNBQESQNJD-UHFFFAOYSA-N	approved; nutraceutical	0.0117902	3	#N/A	aging
DB00166	Lipoic acid	864	KDM4E	864	OC(=O)CCCCC1SSCC1	AGBQKNBQESQNJD-UHFFFAOYSA-N	approved; nutraceutical	0.00930872	4	#N/A	aging
DB00166	Lipoic acid	864	L3MBTL1	864	OC(=O)CCCCC1SSCC1	AGBQKNBQESQNJD-UHFFFAOYSA-N	approved; nutraceutical	0.0259511	Known	#N/A	aging
DB00166	Lipoic acid	864	RECQL	864	OC(=O)CCCCC1SSCC1	AGBQKNBQESQNJD-UHFFFAOYSA-N	approved; nutraceutical	0.0207289	Known	#N/A	aging
DB00166	Lipoic acid	864	SAE1	864	OC(=O)CCCCC1SSCC1	AGBQKNBQESQNJD-UHFFFAOYSA-N	approved; nutraceutical	0.0313542	Known	#N/A	aging
DB00166	Lipoic acid	864	TDP1	864	OC(=O)CCCCC1SSCC1	AGBQKNBQESQNJD-UHFFFAOYSA-N	approved; nutraceutical	0.024301	Known	#N/A	aging
DB00172	L-Proline	6971047	BLM	6971047	OC(=O)[C@@H]1CCCN1	ONIBWKKTOPOVIA-BYPYZUCNSA-N	approved; nutraceutical	0.00723294	2	Homo sapiens	aging
DB00172	L-Proline	6971047	HTT	6971047	OC(=O)[C@@H]1CCCN1	ONIBWKKTOPOVIA-BYPYZUCNSA-N	approved; nutraceutical	0.00611094	3	Homo sapiens	aging
DB00172	L-Proline	6971047	LMNA	6971047	OC(=O)[C@@H]1CCCN1	ONIBWKKTOPOVIA-BYPYZUCNSA-N	approved; nutraceutical	0.0593428	Known	Homo sapiens	aging
DB00172	L-Proline	6971047	TSHR	6971047	OC(=O)[C@@H]1CCCN1	ONIBWKKTOPOVIA-BYPYZUCNSA-N	approved; nutraceutical	0.00970663	1	#N/A	aging
DB00172	L-Proline	6971047	HSD17B10	6971047	OC(=O)[C@@H]1CCCN1	ONIBWKKTOPOVIA-BYPYZUCNSA-N	approved; nutraceutical	0.00551929	4	#N/A	aging
DB00172	L-Proline	6971047	ALDH1A1	6971047	OC(=O)[C@@H]1CCCN1	ONIBWKKTOPOVIA-BYPYZUCNSA-N	approved; nutraceutical	0.00548376	5	#N/A	aging
DB04299	Maleic acid	444266	MAPT	444266	OC(=O)/C=C\C(=O)O	VZCYOOQTPOCHFL-UPHRSURJSA-N	experimental	0.00898367	1	Homo sapiens	aging
DB04299	Maleic acid	444266	LMNA	444266	OC(=O)/C=C\C(=O)O	VZCYOOQTPOCHFL-UPHRSURJSA-N	experimental	0.00865396	2	Homo sapiens	aging
DB04299	Maleic acid	444266	TP53	444266	OC(=O)/C=C\C(=O)O	VZCYOOQTPOCHFL-UPHRSURJSA-N	experimental	0.0539668	Known	Homo sapiens	aging
DB04299	Maleic acid	444266	TBXAS1	444266	OC(=O)/C=C\C(=O)O	VZCYOOQTPOCHFL-UPHRSURJSA-N	experimental	0.00774653	3	#N/A	aging
DB04299	Maleic acid	444266	HPGD	444266	OC(=O)/C=C\C(=O)O	VZCYOOQTPOCHFL-UPHRSURJSA-N	experimental	0.00723754	4	#N/A	aging
DB04299	Maleic acid	444266	TSHR	444266	OC(=O)/C=C\C(=O)O	VZCYOOQTPOCHFL-UPHRSURJSA-N	experimental	0.0651188	Known	#N/A	aging
DB01776	M-Cresol	342	LMNA	342	Cc1cccc(c1)O	RLSSMJSEOOYNOY-UHFFFAOYSA-N	experimental	0.00880247	3	Homo sapiens	aging
DB01776	M-Cresol	342	TOP1	342	Cc1cccc(c1)O	RLSSMJSEOOYNOY-UHFFFAOYSA-N	experimental	0.00627156	5	Homo sapiens	aging
DB01776	M-Cresol	342	BCHE	342	Cc1cccc(c1)O	RLSSMJSEOOYNOY-UHFFFAOYSA-N	experimental	0.0330274	1	#N/A	aging
DB01776	M-Cresol	342	GDA	342	Cc1cccc(c1)O	RLSSMJSEOOYNOY-UHFFFAOYSA-N	experimental	0.00996819	2	#N/A	aging
[truncated: 1,433 more rows]
