# Supplementary material for: Quantitative and Systems Pharmacology 3. Network-Based Identification of New Targets for Natural Products Enables Potential Uses in Aging-Associated Disorders
Source: Front Pharmacol. 2017 Oct 18;8:747. doi: 10.3389/fphar.2017.00747 (PMC5651538; doi:10.3389/fphar.2017.00747)
Supplement: Table S5 — The detailed information of known experimental targets for both natural products and non-natural products collected from DrugBank for Wilcoxon test. [file DataSheet5.XLSX]

## Sheet: data-experimental
Name	Experimentally known targets	Type
DB00157	144	Non
DB02379	90	Non
DB03147	85	Non
DB03461	60	Non
DB03247	54	Non
DB04315	51	Non
DB00334	50	Non
DB04395	49	Non
DB04147	49	Non
DB00543	48	Non
DB01992	45	Non
DB04464	43	Non
DB01049	41	Non
DB03814	39	Non
DB01752	36	Non
DB00231	36	Non
DB00897	36	Non
DB00321	35	Non
DB00842	35	Non
DB00408	34	Non
DB00829	34	Non
DB00171	33	Non
DB01159	33	Non
DB00477	32	Non
DB00801	32	Non
DB01215	32	Non
DB01588	32	Non
DB00909	31	Non
DB01589	31	Non
DB00421	27	Non
DB08185	27	Non
DB00363	26	Non
DB01224	26	Non
DB00241	26	Non
DB00306	26	Non
DB00463	26	Non
DB00794	26	Non
DB00246	25	Non
DB00540	25	Non
DB00726	25	Non
DB01238	25	Non
DB00126	25	Non
DB04233	25	Non
DB08690	25	Non
DB04447	24	Non
DB00370	23	Non
DB00458	23	Non
DB01142	23	Non
DB06148	23	Non
DB00228	23	Non
DB00753	23	Non
DB01028	23	Non
DB01236	23	Non
DB03317	23	Non
DB00786	23	Non
DB00248	22	Non
DB01189	22	Non
DB00514	22	Non
DB00371	22	Non
DB02659	21	Non
DB01151	21	Non
DB04522	21	Non
DB00273	21	Non
DB00402	21	Non
DB06216	20	Non
DB01221	20	Non
DB00818	20	Non
DB01595	20	Non
DB04137	19	Non
DB01403	19	Non
DB03801	19	Non
DB00683	19	Non
DB00690	19	Non
DB01205	19	Non
DB01558	19	Non
DB08896	18	Non
DB01200	18	Non
DB04855	18	Non
DB00292	18	Non
DB02772	17	Non
DB00182	17	Non
DB00934	17	Non
DB01186	17	Non
DB01267	17	Non
DB03721	17	Non
DB08846	17	Non
DB00418	17	Non
DB00186	17	Non
DB00628	17	Non
DB01068	17	Non
DB01107	17	Non
DB01437	17	Non
DB01136	16	Non
DB04530	16	Non
DB00661	16	Non
DB00568	16	Non
DB00721	16	Non
DB00189	16	Non
DB00349	16	Non
DB00404	16	Non
DB00475	16	Non
DB00546	16	Non
DB01559	16	Non
DB01567	16	Non
DB01594	16	Non
DB00188	16	Non
DB03661	15	Non
DB08901	15	Non
DB03435	15	Non
DB04141	15	Non
DB00622	15	Non
DB00714	15	Non
DB08818	15	Non
DB02494	15	Non
DB01110	15	Non
DB05147	15	Non
DB01972	14	Non
DB00420	14	Non
DB00734	14	Non
DB00777	14	Non
DB00413	14	Non
DB00589	14	Non
DB01769	14	Non
DB03909	14	Non
DB08515	14	Non
DB08437	13	Non
DB01363	13	Non
DB00493	13	Non
DB03685	13	Non
DB02726	13	Non
DB02153	13	Non
DB01023	13	Non
DB08689	13	Non
DB07374	13	Non
DB01812	12	Non
DB05492	12	Non
DB00116	12	Non
DB02010	12	Non
DB01239	12	Non
DB01174	12	Non
DB01331	12	Non
DB00668	11	Non
DB04946	11	Non
DB01577	11	Non
DB02580	11	Non
DB04083	11	Non
DB01388	11	Non
DB00599	11	Non
DB04310	11	Non
DB02059	11	Non
DB01873	11	Non
DB03010	11	Non
DB02452	10	Non
DB01254	10	Non
DB06616	10	Non
DB06151	10	Non
DB01069	10	Non
DB06262	10	Non
DB00393	10	Non
DB02142	10	Non
DB09060	10	Non
DB03127	10	Non
DB02482	10	Non
DB00398	10	Non
DB00381	10	Non
DB00308	10	Non
DB03496	10	Non
DB00849	10	Non
DB01352	10	Non
DB01353	10	Non
DB01354	10	Non
DB01355	10	Non
DB01496	10	Non
DB04799	10	Non
DB07401	10	Non
DB07763	10	Non
DB07778	10	Non
DB08330	10	Non
DB03345	10	Non
DB06589	10	Non
DB09079	10	Non
DB00289	10	Non
DB06738	10	Non
DB06603	10	Non
DB00920	10	Non
DB00199	9	Non
DB00619	9	Non
DB03740	9	Non
DB00805	9	Non
DB01149	9	Non
DB01365	9	Non
DB03323	9	Non
DB02007	9	Non
DB01045	9	Non
DB01017	9	Non
DB00200	9	Non
DB00594	9	Non
DB03152	9	Non
DB04444	9	Non
DB01244	9	Non
DB01373	9	Non
DB02761	9	Non
DB03403	9	Non
DB01329	9	Non
DB01643	9	Non
DB07918	9	Non
DB00438	9	Non
DB04896	9	Non
DB00713	9	Non
DB00242	9	Non
DB02596	8	Non
DB03059	8	Non
DB01915	8	Non
DB01987	8	Non
DB00651	8	Non
DB00457	8	Non
DB00800	8	Non
DB00925	8	Non
DB06144	8	Non
DB01064	8	Non
DB04566	8	Non
DB01863	8	Non
DB00755	8	Non
DB00244	8	Non
DB00586	8	Non
DB00456	8	Non
DB00774	8	Non
DB01050	8	Non
DB04355	8	Non
DB01054	8	Non
DB02930	8	Non
DB02431	8	Non
DB00715	8	Non
DB03963	8	Non
DB01268	8	Non
DB00303	8	Non
DB03800	8	Non
DB04465	8	Non
DB03397	8	Non
DB02552	8	Non
DB09078	8	Non
DB00328	8	Non
DB00247	8	Non
DB01442	8	Non
DB00759	8	Non
DB00415	8	Non
DB07954	8	Non
DB04646	8	Non
DB00780	7	Non
DB02196	7	Non
DB08235	7	Non
DB08236	7	Non
DB01717	7	Non
DB00656	7	Non
DB01472	7	Non
DB01624	7	Non
DB06678	7	Non
DB05271	7	Non
DB01169	7	Non
DB03297	7	Non
DB00819	7	Non
DB00999	7	Non
DB00270	7	Non
DB00342	7	Non
DB01043	7	Non
DB01520	7	Non
DB01041	7	Non
DB00951	7	Non
DB03401	7	Non
DB00430	7	Non
DB04786	7	Non
DB07841	7	Non
DB05066	7	Non
DB01173	7	Non
DB06741	7	Non
DB00216	7	Non
DB01454	7	Non
DB05676	7	Non
DB03382	7	Non
DB08646	7	Non
DB00485	7	Non
DB01088	7	Non
DB08215	7	Non
DB00459	7	Non
DB04485	7	Non
DB02899	7	Non
DB03222	6	Non
DB02338	6	Non
DB01211	6	Non
DB02032	6	Non
DB00197	6	Non
DB02546	6	Non
DB00811	6	Non
DB00806	6	Non
DB00575	6	Non
DB00590	6	Non
DB00679	6	Non
DB00751	6	Non
DB00831	6	Non
DB01162	6	Non
DB01175	6	Non
DB01614	6	Non
DB01622	6	Non
DB09202	6	Non
DB08815	6	Non
DB09068	6	Non
DB00605	6	Non
DB00848	6	Non
DB00118	6	Non
DB01147	6	Non
DB03959	6	Non
DB01632	6	Non
DB01406	6	Non
DB01119	6	Non
DB01660	6	Non
DB01248	6	Non
DB00562	6	Non
DB00836	6	Non
DB00653	6	Non
DB06712	6	Non
DB02733	6	Non
DB02467	6	Non
DB00280	6	Non
DB00434	6	Non
DB00767	6	Non
DB00835	6	Non
DB05740	6	Non
DB04552	6	Non
DB04555	6	Non
DB01183	6	Non
DB03499	6	Non
DB06080	6	Non
DB01411	6	Non
DB00274	6	Non
DB03541	6	Non
DB06016	6	Non
DB02210	6	Non
DB03309	6	Non
DB03026	6	Non
DB04714	6	Non
DB05014	6	Non
DB04160	6	Non
DB05216	6	Non
DB04400	6	Non
DB01327	6	Non
DB01381	6	Non
DB01587	6	Non
DB05087	6	Non
DB01544	6	Non
DB04132	6	Non
DB03203	6	Non
DB04510	6	Non
DB01242	6	Non
DB00768	6	Non
DB06204	6	Non
DB01603	6	Non
DB00115	6	Non
DB01163	6	Non
DB04099	6	Non
DB07080	6	Non
DB01497	6	Non
DB03313	6	Non
DB08889	6	Non
DB00210	6	Non
DB00523	6	Non
DB00926	6	Non
DB00761	6	Non
DB06042	6	Non
DB08342	6	Non
DB07664	5	Non
DB00167	5	Non
DB00449	5	Non
DB03880	5	Non
DB01303	5	Non
DB00598	5	Non
DB00875	5	Non
DB09128	5	Non
DB01407	5	Non
DB08807	5	Non
DB02843	5	Non
DB00233	5	Non
DB00939	5	Non
DB01841	5	Non
DB02120	5	Non
DB03316	5	Non
DB03144	5	Non
DB01021	5	Non
DB00630	5	Non
DB05260	5	Non
DB05047	5	Non
DB03206	5	Non
DB01053	5	Non
DB01598	5	Non
DB08912	5	Non
DB00436	5	Non
DB01325	5	Non
DB00401	5	Non
DB04841	5	Non
DB02052	5	Non
DB00887	5	Non
DB00202	5	Non
DB00340	5	Non
DB00496	5	Non
DB00508	5	Non
DB00572	5	Non
DB00725	5	Non
DB00785	5	Non
DB01036	5	Non
DB05752	5	Non
DB06702	5	Non
DB08897	5	Non
DB09076	5	Non
DB00333	5	Non
DB01161	5	Non
DB08348	5	Non
DB01973	5	Non
DB02342	5	Non
DB02637	5	Non
DB01296	5	Non
DB07636	5	Non
DB00716	5	Non
DB00417	5	Non
DB01328	5	Non
DB04716	5	Non
DB02333	5	Non
DB03751	5	Non
DB03758	5	Non
DB00409	5	Non
DB03280	5	Non
DB03413	5	Non
DB00364	5	Non
DB03205	5	Non
DB08604	5	Non
DB01677	5	Non
DB04493	5	Non
DB01198	5	Non
DB01346	5	Non
DB00431	5	Non
DB02377	5	Non
DB03991	5	Non
DB00615	5	Non
DB00904	5	Non
DB05767	5	Non
DB06089	5	Non
DB04821	5	Non
DB06211	5	Non
DB05210	5	Non
DB05241	5	Non
DB00497	5	Non
DB01565	5	Non
DB00567	5	Non
DB00607	5	Non
DB00739	5	Non
DB08795	5	Non
DB05266	5	Non
DB01212	5	Non
DB02506	5	Non
DB08226	5	Non
DB08266	5	Non
DB00560	5	Non
DB07574	5	Non
DB05184	4	Non
DB01197	4	Non
DB01805	4	Non
DB04450	4	Non
DB00975	4	Non
DB01213	4	Non
DB02721	4	Non
DB01223	4	Non
DB00215	4	Non
DB00346	4	Non
DB00865	4	Non
DB00320	4	Non
DB00697	4	Non
DB00960	4	Non
DB01118	4	Non
DB01359	4	Non
DB08558	4	Non
DB08217	4	Non
DB00905	4	Non
DB02266	4	Non
DB07557	4	Non
DB07859	4	Non
DB07947	4	Non
DB08073	4	Non
DB01014	4	Non
DB04548	4	Non
DB03970	4	Non
DB00284	4	Non
DB01234	4	Non
DB03608	4	Non
DB04491	4	Non
DB07349	4	Non
DB00367	4	Non
DB01026	4	Non
DB01185	4	Non
DB01864	4	Non
DB00642	4	Non
DB00254	4	Non
DB01226	4	Non
DB04282	4	Non
DB03227	4	Non
DB00232	4	Non
DB00311	4	Non
DB00606	4	Non
DB00703	4	Non
DB00880	4	Non
DB01144	4	Non
DB01194	4	Non
DB04920	4	Non
DB01100	4	Non
DB01826	4	Non
DB02345	4	Non
DB00480	4	Non
DB02116	4	Non
DB00198	4	Non
DB00424	4	Non
DB00809	4	Non
DB01233	4	Non
DB01618	4	Non
DB01273	4	Non
DB00336	4	Non
DB05744	4	Non
DB04695	4	Non
DB05075	4	Non
DB01872	4	Non
DB05434	4	Non
DB00207	4	Non
DB04570	4	Non
DB03258	4	Non
DB08234	4	Non
DB02613	4	Non
DB08249	4	Non
DB03760	4	Non
DB03660	4	Non
DB01621	4	Non
DB04599	4	Non
DB05280	4	Non
DB06288	4	Non
DB00281	4	Non
DB05294	4	Non
DB04396	4	Non
DB04473	4	Non
DB01910	4	Non
DB01108	4	Non
DB01196	4	Non
DB03865	4	Non
DB01034	4	Non
DB02039	4	Non
DB02508	4	Non
DB01025	4	Non
DB02264	4	Non
DB02767	4	Non
DB08813	4	Non
DB07490	4	Non
DB00893	4	Non
DB01332	4	Non
DB01413	4	Non
DB01415	4	Non
DB00491	4	Non
DB00466	4	Non
DB03929	4	Non
DB02824	4	Non
DB04982	4	Non
DB01356	4	Non
DB03003	4	Non
DB00487	4	Non
DB01044	4	Non
DB06771	4	Non
DB05223	4	Non
DB06176	4	Non
DB04265	4	Non
DB00667	4	Non
DB00315	4	Non
DB00669	4	Non
DB00952	4	Non
DB00604	4	Non
DB01079	4	Non
DB05412	4	Non
DB05470	4	Non
DB08183	4	Non
DB05785	4	Non
DB00922	4	Non
DB04953	4	Non
DB05146	4	Non
DB05153	4	Non
DB01782	4	Non
DB05157	4	Non
DB01000	4	Non
DB08271	4	Non
DB07724	4	Non
DB08814	4	Non
DB02692	4	Non
DB05004	4	Non
DB00588	4	Non
DB00704	4	Non
DB01548	4	Non
DB03615	4	Non
DB01032	4	Non
DB00319	4	Non
DB01140	4	Non
DB03978	4	Non
DB08811	4	Non
DB01656	4	Non
DB01791	4	Non
DB05219	4	Non
DB08059	4	Non
DB08162	4	Non
DB08756	4	Non
DB00917	4	Non
DB05036	4	Non
DB07551	4	Non
DB07552	4	Non
DB00799	4	Non
DB05232	4	Non
DB00384	4	Non
DB04631	4	Non
DB07671	4	Non
DB06779	4	Non
DB00518	4	Non
DB06663	4	Non
DB03761	4	Non
DB05475	4	Non
DB01375	4	Non
DB02857	3	Non
DB07646	3	Non
DB02251	3	Non
DB00845	3	Non
DB04851	3	Non
DB00222	3	Non
DB03501	3	Non
DB02910	3	Non
DB02255	3	Non
DB00483	3	Non
DB02845	3	Non
DB08357	3	Non
DB02621	3	Non
DB08080	3	Non
DB04297	3	Non
DB06843	3	Non
DB03226	3	Non
DB00211	3	Non
DB00298	3	Non
DB00388	3	Non
DB00706	3	Non
DB00723	3	Non
DB00964	3	Non
DB01295	3	Non
DB01579	3	Non
DB05469	3	Non
DB06207	3	Non
DB01608	3	Non
DB00484	3	Non
DB05461	3	Non
DB00373	3	Non
DB00489	3	Non
DB00866	3	Non
DB01102	3	Non
DB01288	3	Non
DB06726	3	Non
DB08808	3	Non
DB03156	3	Non
DB01076	3	Non
DB01097	3	Non
DB01404	3	Non
DB02383	3	Non
DB01216	3	Non
DB04560	3	Non
DB00512	3	Non
DB02900	3	Non
DB04725	3	Non
DB04237	3	Non
DB03579	3	Non
DB04467	3	Non
DB02122	3	Non
DB04035	3	Non
DB08375	3	Non
DB08551	3	Non
DB03092	3	Non
DB02218	3	Non
DB03773	3	Non
DB00973	3	Non
DB03981	3	Non
DB04334	3	Non
DB03516	3	Non
DB04967	3	Non
DB02594	3	Non
DB02235	3	Non
DB00687	3	Non
DB01395	3	Non
DB02998	3	Non
DB08867	3	Non
DB03142	3	Non
DB02363	3	Non
DB03937	3	Non
DB08648	3	Non
DB03352	3	Non
DB07384	3	Non
DB07394	3	Non
DB08629	3	Non
DB02638	3	Non
DB04392	3	Non
DB03570	3	Non
DB03013	3	Non
DB05764	3	Non
DB00194	3	Non
DB04545	3	Non
DB03847	3	Non
DB03775	3	Non
DB02642	3	Non
DB02841	3	Non
DB02073	3	Non
DB02923	3	Non
DB04039	3	Non
DB02327	3	Non
DB00869	3	Non
DB03385	3	Non
DB04842	3	Non
DB00527	3	Non
DB00623	3	Non
DB00850	3	Non
DB04513	3	Non
DB07853	3	Non
DB05408	3	Non
DB02703	3	Non
DB00446	3	Non
DB02950	3	Non
DB03428	3	Non
DB04014	3	Non
DB02061	3	Non
DB03584	3	Non
DB01914	3	Non
DB07821	3	Non
DB04156	3	Non
DB03109	3	Non
DB04404	3	Non
DB00245	3	Non
DB00332	3	Non
DB00383	3	Non
DB00392	3	Non
DB00411	3	Non
DB00462	3	Non
DB00505	3	Non
DB00517	3	Non
DB00986	3	Non
DB01062	3	Non
DB01231	3	Non
DB01409	3	Non
DB05766	3	Non
DB00728	3	Non
DB01337	3	Non
DB01338	3	Non
DB01090	3	Non
DB01156	3	Non
DB01227	3	Non
DB08837	3	Non
DB02415	3	Non
DB03149	3	Non
DB00441	3	Non
DB03912	3	Non
DB04820	3	Non
DB07506	3	Non
DB08910	3	Non
DB05194	3	Non
DB04604	3	Non
DB04751	3	Non
DB03976	3	Non
DB06822	3	Non
DB01009	3	Non
DB00916	3	Non
DB04029	3	Non
DB01073	3	Non
DB01960	3	Non
DB03886	3	Non
DB01117	3	Non
DB00756	3	Non
DB00372	3	Non
DB01038	3	Non
DB01623	3	Non
DB00915	3	Non
DB04889	3	Non
DB09207	3	Non
DB09014	3	Non
DB04908	3	Non
DB04199	3	Non
DB05007	3	Non
DB08916	3	Non
DB04847	3	Non
DB00255	3	Non
DB04468	3	Non
DB05487	3	Non
DB06927	3	Non
DB01109	3	Non
DB01123	3	Non
DB01766	3	Non
DB02193	3	Non
DB03136	3	Non
DB03159	3	Non
DB01083	3	Non
DB01785	3	Non
DB04079	3	Non
DB00686	3	Non
DB00877	3	Non
DB02301	3	Non
DB04879	3	Non
DB06626	3	Non
DB07227	3	Non
DB07771	3	Non
DB00634	3	Non
DB02437	3	Non
DB05168	3	Non
DB07669	3	Non
DB04918	3	Non
DB05659	3	Non
DB00425	3	Non
DB01154	3	Non
DB07910	3	Non
DB08425	3	Non
DB02263	3	Non
DB02236	3	Non
DB02445	3	Non
DB03434	3	Non
DB02076	3	Non
DB01709	3	Non
DB03942	3	Non
DB00949	3	Non
DB07995	3	Non
DB03597	3	Non
DB00218	3	Non
DB00467	3	Non
DB00685	3	Non
DB00978	3	Non
DB01059	3	Non
DB01137	3	Non
DB01165	3	Non
DB01208	3	Non
DB04576	3	Non
DB09047	3	Non
DB01962	3	Non
DB02315	3	Non
DB05651	3	Non
DB00227	3	Non
DB08168	3	Non
DB03169	3	Non
DB04419	3	Non
DB09016	3	Non
DB04652	3	Non
DB04884	3	Non
DB08810	3	Non
DB00953	3	Non
DB05743	3	Non
DB06096	3	Non
DB00574	3	Non
DB06594	3	Non
DB02643	3	Non
DB07909	3	Non
DB08562	3	Non
DB07416	3	Non
DB05250	3	Non
DB08513	3	Non
DB02270	3	Non
DB03687	3	Non
DB05122	3	Non
DB08895	3	Non
DB04957	3	Non
DB00204	3	Non
DB08875	3	Non
DB02053	3	Non
DB00400	3	Non
DB01862	3	Non
DB03023	3	Non
DB02471	3	Non
DB00513	3	Non
DB04743	3	Non
DB04422	3	Non
DB03995	3	Non
DB02742	3	Non
DB04832	3	Non
DB03709	3	Non
DB02597	3	Non
DB05387	3	Non
DB00535	3	Non
DB00948	3	Non
DB03148	3	Non
DB08378	3	Non
DB00558	3	Non
DB08915	3	Non
DB07863	3	Non
DB08175	3	Non
DB08402	3	Non
DB00698	3	Non
DB02234	3	Non
DB01997	3	Non
DB02044	3	Non
DB00327	3	Non
DB00611	3	Non
DB00647	3	Non
DB00708	3	Non
DB00813	3	Non
DB00844	3	Non
DB00854	3	Non
DB00899	3	Non
DB00921	3	Non
DB01439	3	Non
DB01452	3	Non
DB01535	3	Non
DB01571	3	Non
DB06274	3	Non
DB09272	3	Non
DB00652	3	Non
DB00374	3	Non
DB01240	3	Non
DB09074	3	Non
DB01150	3	Non
DB07497	3	Non
DB01427	3	Non
DB08299	3	Non
DB00862	3	Non
DB03777	3	Non
DB04707	3	Non
DB07876	3	Non
DB01103	3	Non
DB01393	3	Non
DB05187	3	Non
DB06905	3	Non
DB01692	3	Non
DB04325	3	Non
DB00929	3	Non
DB00812	3	Non
DB00749	3	Non
DB02098	3	Non
DB05428	3	Non
DB00307	3	Non
DB06218	3	Non
DB00720	3	Non
DB00285	3	Non
DB00422	3	Non
DB00476	3	Non
DB00579	3	Non
DB01105	3	Non
DB06701	3	Non
DB04894	3	Non
DB01179	3	Non
DB08081	3	Non
DB03171	3	Non
DB04005	3	Non
DB04634	3	Non
DB08726	3	Non
DB04457	2	Non
DB03798	2	Non
DB07379	2	Non
DB07620	2	Non
DB07743	2	Non
DB08732	2	Non
DB07818	2	Non
DB07819	2	Non
DB00626	2	Non
DB01646	2	Non
DB08649	2	Non
DB08767	2	Non
DB01080	2	Non
DB01599	2	Non
DB00778	2	Non
DB04905	2	Non
DB01138	2	Non
DB00731	2	Non
DB00912	2	Non
DB01067	2	Non
DB01120	2	Non
DB01124	2	Non
DB01251	2	Non
DB01252	2	Non
DB01382	2	Non
DB03878	2	Non
DB04868	2	Non
DB03214	2	Non
DB00616	2	Non
DB00691	2	Non
DB00722	2	Non
DB00886	2	Non
DB05203	2	Non
DB00382	2	Non
DB00545	2	Non
DB00677	2	Non
DB00733	2	Non
DB00944	2	Non
DB00989	2	Non
DB01010	2	Non
DB01245	2	Non
DB03283	2	Non
DB04892	2	Non
DB08167	2	Non
DB04351	2	Non
DB04214	2	Non
DB03825	2	Non
DB02042	2	Non
DB08597	2	Non
DB05255	2	Non
DB03559	2	Non
DB00358	2	Non
DB00450	2	Non
DB00692	2	Non
DB06706	2	Non
DB06707	2	Non
DB00745	2	Non
DB01255	2	Non
DB00629	2	Non
DB00968	2	Non
DB01018	2	Non
DB00195	2	Non
DB00221	2	Non
DB00264	2	Non
DB00521	2	Non
DB00612	2	Non
DB00841	2	Non
DB01001	2	Non
DB01193	2	Non
DB01203	2	Non
DB01210	2	Non
DB01214	2	Non
DB01291	2	Non
DB01580	2	Non
DB04846	2	Non
DB04861	2	Non
DB07543	2	Non
DB03510	2	Non
DB07640	2	Non
DB05206	2	Non
DB01029	2	Non
DB01349	2	Non
DB04303	2	Non
DB00379	2	Non
DB00499	2	Non
DB05383	2	Non
DB08772	2	Non
DB04674	2	Non
DB07768	2	Non
DB07584	2	Non
DB07585	2	Non
DB07812	2	Non
DB02068	2	Non
DB02260	2	Non
DB00534	2	Non
DB02512	2	Non
DB01982	2	Non
DB02734	2	Non
DB08865	2	Non
DB00471	2	Non
DB00711	2	Non
DB08413	2	Non
DB01143	2	Non
DB00260	2	Non
DB04327	2	Non
DB00355	2	Non
DB03530	2	Non
DB07823	2	Non
DB07824	2	Non
DB03439	2	Non
DB03971	2	Non
DB03277	2	Non
DB04319	2	Non
DB02237	2	Non
DB04941	2	Non
DB06196	2	Non
DB00288	2	Non
DB00741	2	Non
DB03935	2	Non
DB02901	2	Non
DB06412	2	Non
DB04062	2	Non
DB03485	2	Non
DB07348	2	Non
DB03731	2	Non
DB08554	2	Non
DB02267	2	Non
DB04328	2	Non
DB04539	2	Non
DB03350	2	Non
DB04347	2	Non
DB08650	2	Non
DB02201	2	Non
DB02801	2	Non
DB01800	2	Non
DB04456	2	Non
DB02763	2	Non
DB02309	2	Non
DB01370	2	Non
DB01077	2	Non
DB01133	2	Non
DB07347	2	Non
DB05169	2	Non
DB05198	2	Non
DB07186	2	Non
DB08066	2	Non
DB07340	2	Non
DB00872	2	Non
DB05452	2	Non
DB06212	2	Non
DB03041	2	Non
DB07045	2	Non
DB02811	2	Non
DB03822	2	Non
DB04251	2	Non
DB01367	2	Non
DB04940	2	Non
DB05281	2	Non
DB03862	2	Non
DB01606	2	Non
DB02614	2	Non
DB03450	2	Non
DB03472	2	Non
DB04037	2	Non
DB04430	2	Non
DB02154	2	Non
DB02450	2	Non
DB02968	2	Non
DB04133	2	Non
DB01705	2	Non
DB07911	2	Non
DB07914	2	Non
DB03380	2	Non
DB04178	2	Non
DB05190	2	Non
DB02483	2	Non
DB00428	2	Non
DB07432	2	Non
DB01031	2	Non
DB08155	2	Non
DB08156	2	Non
DB08157	2	Non
DB00695	2	Non
DB03975	2	Non
DB08765	2	Non
DB05304	2	Non
DB01202	2	Non
DB06751	2	Non
DB04838	2	Non
DB04922	2	Non
DB03459	2	Non
DB05760	2	Non
DB01429	2	Non
DB03977	2	Non
DB04825	2	Non
DB08039	2	Non
DB01011	2	Non
DB04119	2	Non
DB07766	2	Non
DB07676	2	Non
DB04276	2	Non
DB05301	2	Non
DB05507	2	Non
DB03556	2	Non
DB02091	2	Non
DB02407	2	Non
DB02833	2	Non
DB02915	2	Non
DB06844	2	Non
DB06944	2	Non
DB06948	2	Non
DB07126	2	Non
DB07137	2	Non
DB07164	2	Non
DB07203	2	Non
DB07471	2	Non
DB07533	2	Non
DB07534	2	Non
DB07538	2	Non
DB07539	2	Non
DB07562	2	Non
DB07688	2	Non
DB07852	2	Non
DB08178	2	Non
DB08182	2	Non
DB08218	2	Non
DB08219	2	Non
DB08233	2	Non
DB08241	2	Non
DB08248	2	Non
DB08285	2	Non
DB08309	2	Non
DB08355	2	Non
DB08463	2	Non
DB08527	2	Non
DB08572	2	Non
DB05501	2	Non
DB05389	2	Non
DB05398	2	Non
DB05037	2	Non
DB07431	2	Non
DB09073	2	Non
DB07364	2	Non
DB04348	2	Non
DB02341	2	Non
DB03925	2	Non
DB04795	2	Non
DB03544	2	Non
DB00445	2	Non
DB05149	2	Non
DB03487	2	Non
DB04628	2	Non
DB02813	2	Non
DB04520	2	Non
DB03632	2	Non
DB04350	2	Non
DB00185	2	Non
DB00354	2	Non
DB00366	2	Non
DB00804	2	Non
DB00810	2	Non
DB00940	2	Non
DB01148	2	Non
DB04843	2	Non
DB01135	2	Non
DB01336	2	Non
DB08801	2	Non
DB01625	2	Non
DB04924	2	Non
DB05069	2	Non
DB05458	2	Non
DB02681	2	Non
DB02983	2	Non
DB04367	2	Non
DB08691	2	Non
DB08222	2	Non
DB04016	2	Non
DB00486	2	Non
DB02382	2	Non
DB04532	2	Non
DB04866	2	Non
DB04058	2	Non
DB01074	2	Non
DB02648	2	Non
DB02519	2	Non
DB05235	2	Non
DB02186	2	Non
DB03863	2	Non
DB03879	2	Non
DB08325	2	Non
DB04217	2	Non
DB04126	2	Non
DB02216	2	Non
DB01810	2	Non
DB01871	2	Non
DB03536	2	Non
DB03573	2	Non
DB03691	2	Non
DB02869	2	Non
DB04451	2	Non
DB02213	2	Non
DB03077	2	Non
DB00452	2	Non
DB02110	2	Non
DB00357	2	Non
DB00648	2	Non
DB05338	2	Non
DB05024	2	Non
DB01436	2	Non
DB04794	2	Non
DB01007	2	Non
DB01167	2	Non
DB07705	2	Non
DB04647	2	Non
DB03252	2	Non
DB04166	2	Non
DB07242	2	Non
DB01649	2	Non
DB03958	2	Non
DB02831	2	Non
DB03590	2	Non
DB08605	2	Non
DB08523	2	Non
DB04087	2	Non
DB04198	2	Non
DB01929	2	Non
DB01958	2	Non
DB02001	2	Non
DB02402	2	Non
DB04163	2	Non
DB04306	2	Non
DB00205	2	Non
DB00440	2	Non
DB01131	2	Non
DB02427	2	Non
DB02559	2	Non
DB03125	2	Non
DB03987	2	Non
DB06813	2	Non
DB07140	2	Non
DB07142	2	Non
DB02532	2	Non
DB01946	2	Non
DB01035	2	Non
DB01099	2	Non
DB01063	2	Non
DB05816	2	Non
DB00391	2	Non
DB00490	2	Non
DB00933	2	Non
DB01184	2	Non
DB01549	2	Non
DB04844	2	Non
DB04888	2	Non
DB05316	2	Non
DB05687	2	Non
DB06077	2	Non
DB03666	2	Non
DB01965	2	Non
DB04685	2	Non
DB02496	2	Non
DB08651	2	Non
DB00559	2	Non
DB06268	2	Non
DB06403	2	Non
DB08932	2	Non
DB00530	2	Non
DB01259	2	Non
DB05900	2	Non
DB07662	2	Non
DB08687	2	Non
DB05161	2	Non
DB04639	2	Non
DB00239	2	Non
DB00257	2	Non
DB00294	2	Non
DB00304	2	Non
DB00481	2	Non
DB00603	2	Non
DB00823	2	Non
DB00957	2	Non
DB00977	2	Non
DB01431	2	Non
DB02615	2	Non
DB04574	2	Non
DB05882	2	Non
DB06871	2	Non
DB06898	2	Non
DB07086	2	Non
DB07087	2	Non
DB07195	2	Non
DB07638	2	Non
DB07678	2	Non
DB07707	2	Non
DB07708	2	Non
DB07712	2	Non
DB07932	2	Non
DB07933	2	Non
DB08020	2	Non
DB08047	2	Non
DB08048	2	Non
DB08320	2	Non
DB08595	2	Non
DB08773	2	Non
DB06832	2	Non
DB06875	2	Non
DB07009	2	Non
DB07119	2	Non
DB07150	2	Non
DB07198	2	Non
DB07230	2	Non
DB07236	2	Non
DB07702	2	Non
DB06884	2	Non
DB00569	2	Non
DB01225	2	Non
DB07211	2	Non
DB07277	2	Non
DB07278	2	Non
DB01767	2	Non
DB05777	2	Non
DB06838	2	Non
DB06845	2	Non
DB06850	2	Non
DB06853	2	Non
DB06854	2	Non
DB06858	2	Non
DB07088	2	Non
DB07091	2	Non
DB07095	2	Non
DB07131	2	Non
DB07376	2	Non
DB08254	2	Non
DB05361	2	Non
DB07207	2	Non
DB07247	2	Non
DB08232	2	Non
DB03813	2	Non
DB04302	2	Non
DB03264	2	Non
DB01652	2	Non
DB03613	2	Non
DB04067	2	Non
DB00895	2	Non
DB00707	2	Non
DB02897	2	Non
DB05317	2	Non
DB00399	2	Non
DB02058	2	Non
DB04173	2	Non
DB02724	2	Non
DB02671	2	Non
DB00337	2	Non
DB03338	2	Non
DB05913	2	Non
DB05465	2	Non
DB01853	2	Non
DB04893	2	Non
DB06953	2	Non
DB07216	2	Non
DB07895	2	Non
DB08180	2	Non
DB08674	2	Non
DB08676	2	Non
DB02015	2	Non
DB02718	2	Non
DB02119	2	Non
DB01015	2	Non
DB04047	2	Non
DB03592	2	Non
DB00250	2	Non
DB00158	2	Non
DB00293	2	Non
DB01846	2	Non
DB04082	2	Non
DB01666	2	Non
DB00267	2	Non
DB00181	2	Non
DB00837	2	Non
DB05010	2	Non
DB08891	2	Non
DB08892	2	Non
DB00962	2	Non
DB04903	2	Non
DB01440	2	Non
DB06716	2	Non
DB00602	2	Non
DB02783	2	Non
DB01887	2	Non
DB01891	2	Non
DB03141	2	Non
DB03676	2	Non
DB05342	2	Non
DB07191	2	Non
DB07327	2	Non
DB07332	2	Non
DB08286	2	Non
DB08372	2	Non
DB08428	2	Non
DB08598	2	Non
DB01861	2	Non
DB02205	2	Non
DB04185	2	Non
DB07410	2	Non
DB02657	2	Non
DB03581	2	Non
DB01857	2	Non
DB03602	2	Non
DB02937	2	Non
DB04551	2	Non
DB03633	2	Non
DB03951	2	Non
DB00644	2	Non
DB00666	2	Non
DB00468	2	Non
DB03042	2	Non
DB08954	2	Non
DB03575	2	Non
DB05096	2	Non
DB06201	2	Non
DB03310	2	Non
DB01834	2	Non
DB02458	2	Non
DB03314	2	Non
DB02633	2	Non
DB04529	2	Non
DB00365	2	Non
DB01155	2	Non
DB01405	2	Non
DB00817	2	Non
DB05488	2	Non
DB07060	2	Non
DB07907	2	Non
DB02126	2	Non
DB07427	2	Non
DB07428	2	Non
DB08077	2	Non
DB08262	2	Non
DB08486	2	Non
DB01809	2	Non
DB09034	2	Non
DB02054	2	Non
DB07338	2	Non
DB03747	2	Non
DB03861	2	Non
DB05030	2	Non
DB04472	2	Non
DB03349	2	Non
DB01813	2	Non
DB03997	2	Non
DB03811	2	Non
DB04201	2	Non
DB00641	2	Non
DB04912	2	Non
DB03643	2	Non
DB00637	2	Non
DB01106	2	Non
DB01146	2	Non
DB01176	2	Non
DB05079	2	Non
DB05080	2	Non
DB06698	2	Non
DB00635	2	Non
DB02329	2	Non
DB02424	2	Non
DB02754	2	Non
DB05134	2	Non
DB06070	2	Non
DB07594	2	Non
DB07877	2	Non
DB08464	2	Non
DB08465	2	Non
DB05509	2	Non
DB00918	2	Non
DB00998	2	Non
DB01191	2	Non
DB04917	2	Non
DB04279	2	Non
DB05472	2	Non
DB01250	2	Non
DB01890	2	Non
DB07441	2	Non
DB08409	2	Non
DB04688	2	Non
DB01851	2	Non
DB00995	2	Non
DB05078	2	Non
DB05207	2	Non
DB05303	2	Non
DB05017	2	Non
DB00688	2	Non
DB03948	2	Non
DB06103	2	Non
DB01693	2	Non
DB00775	2	Non
DB04863	2	Non
DB05802	2	Non
DB08877	2	Non
DB00808	2	Non
DB00276	2	Non
DB01182	2	Non
DB01218	2	Non
DB00350	2	Non
DB00914	2	Non
DB00561	2	Non
DB01003	2	Non
DB02433	2	Non
DB03745	2	Non
DB04482	2	Non
DB01087	2	Non
DB03515	2	Non
DB02632	2	Non
DB02386	2	Non
DB02401	2	Non
DB02080	2	Non
DB02976	2	Non
DB00290	2	Non
DB07041	2	Non
DB02776	2	Non
DB02745	2	Non
DB02062	2	Non
DB02352	2	Non
DB03424	2	Non
DB05745	2	Non
DB06851	2	Non
DB08439	2	Non
DB01912	2	Non
DB03967	2	Non
DB00752	2	Non
DB01037	2	Non
DB01247	2	Non
DB01626	2	Non
DB01882	2	Non
DB02151	2	Non
DB02408	2	Non
DB02909	2	Non
DB03799	2	Non
DB04015	2	Non
DB02152	2	Non
DB08911	2	Non
DB04338	2	Non
DB07010	2	Non
DB08521	2	Non
DB06882	2	Non
DB07218	2	Non
DB07272	2	Non
DB07276	2	Non
DB07728	2	Non
DB08358	2	Non
DB03680	2	Non
DB08696	2	Non
DB04324	2	Non
DB02595	2	Non
DB01718	2	Non
DB07556	2	Non
DB08403	2	Non
DB00551	2	Non
DB02697	2	Non
DB03033	2	Non
DB01039	2	Non
DB02800	2	Non
DB01414	2	Non
DB01975	2	Non
DB02158	2	Non
DB02281	2	Non
DB02282	2	Non
DB02933	2	Non
DB00980	2	Non
DB05359	2	Non
DB09071	2	Non
DB02435	2	Non
DB04474	2	Non
DB01673	2	Non
DB02314	2	Non
DB06614	2	Non
DB08570	2	Non
DB02951	2	Non
DB06908	2	Non
DB07215	2	Non
DB07530	2	Non
DB08220	2	Non
DB08742	2	Non
DB08601	2	Non
DB08264	2	Non
DB05212	2	Non
DB05451	2	Non
DB05464	2	Non
DB04253	2	Non
DB03469	2	Non
DB02181	2	Non
DB02180	2	Non
DB03062	2	Non
DB02031	2	Non
DB01821	2	Non
DB02027	2	Non
DB02077	2	Non
DB02644	2	Non
DB03449	2	Non
DB03707	2	Non
DB04223	2	Non
DB08018	2	Non
DB08019	2	Non
DB02207	2	Non
DB03100	2	Non
DB04534	2	Non
DB07388	2	Non
DB07244	2	Non
DB03151	2	Non
DB05265	2	Non
DB01935	2	Non
DB02669	2	Non
DB01613	2	Non
DB01786	2	Non
DB00847	2	Non
DB05045	2	Non
DB07929	2	Non
DB08063	2	Non
DB01220	2	Non
DB08864	2	Non
DB00351	2	Non
DB00834	2	Non
DB01047	2	Non
DB07199	2	Non
DB07200	2	Non
DB03654	2	Non
DB04205	2	Non
DB04352	2	Non
DB02987	2	Non
DB04022	2	Non
DB02209	2	Non
DB02127	2	Non
DB02138	2	Non
DB03347	2	Non
DB07365	2	Non
DB00956	2	Non
DB01081	2	Non
DB01192	2	Non
DB01444	2	Non
DB01209	2	Non
DB05046	2	Non
DB06800	2	Non
DB08748	2	Non
DB00426	2	Non
DB02731	2	Non
DB00709	2	Non
DB01082	2	Non
DB03708	2	Non
DB07232	2	Non
DB00447	2	Non
DB00833	2	Non
DB01066	2	Non
DB09050	2	Non
DB00820	2	Non
DB05142	2	Non
DB06842	2	Non
DB01954	2	Non
DB01959	2	Non
DB03606	2	Non
DB03849	2	Non
DB04149	2	Non
DB00482	2	Non
DB03881	2	Non
DB00851	2	Non
DB02835	2	Non
DB07817	2	Non
DB03635	2	Non
DB06836	2	Non
DB06831	2	Non
DB02656	2	Non
DB07335	2	Non
DB06959	2	Non
DB07107	2	Non
DB07204	2	Non
DB07583	2	Non
DB07854	2	Non
DB07855	2	Non
DB07856	2	Non
DB07857	2	Non
DB07858	2	Non
DB07860	2	Non
DB07996	2	Non
DB07997	2	Non
DB08070	2	Non
DB08113	2	Non
DB08114	2	Non
DB08148	2	Non
DB08149	2	Non
DB08150	2	Non
DB08568	2	Non
DB08569	2	Non
DB01905	2	Non
DB02526	2	Non
DB03876	2	Non
DB05254	2	Non
DB00900	2	Non
DB03101	2	Non
DB03551	2	Non
DB00495	2	Non
DB07435	2	Non
DB00631	2	Non
DB07652	2	Non
DB04971	2	Non
DB04906	2	Non
DB03535	2	Non
DB05798	2	Non
DB05013	2	Non
DB00464	2	Non
DB04410	2	Non
DB04654	2	Non
DB00297	2	Non
DB00770	2	Non
DB01160	2	Non
DB07177	2	Non
DB00461	2	Non
DB00465	2	Non
DB00469	2	Non
DB00500	2	Non
DB00554	2	Non
DB00573	2	Non
DB00712	2	Non
DB00784	2	Non
DB00788	2	Non
DB00814	2	Non
DB00821	2	Non
DB00861	2	Non
DB00870	2	Non
DB00963	2	Non
DB00991	2	Non
DB01283	2	Non
DB01397	2	Non
DB01401	2	Non
DB01435	2	Non
DB01600	2	Non
DB06725	2	Non
DB06802	2	Non
DB08371	2	Non
DB02836	2	Non
DB02954	2	Non
DB03051	2	Non
DB02320	2	Non
DB02890	2	Non
DB03315	2	Non
DB03808	2	Non
DB04942	2	Non
DB04286	2	Non
DB04387	2	Non
DB03723	2	Non
DB04162	2	Non
DB03161	2	Non
DB01842	2	Non
DB03448	2	Non
DB01361	2	Non
DB01369	2	Non
DB02566	2	Non
DB02940	2	Non
DB04788	2	Non
DB00256	2	Non
DB00453	2	Non
DB00595	2	Non
DB00618	2	Non
DB05003	2	Non
DB00473	2	Non
DB00252	2	Non
DB01195	2	Non
DB00243	2	Non
DB00740	2	Non
DB00407	2	Non
DB06714	2	Non
DB08907	2	Non
DB00344	2	Non
DB00937	2	Non
DB04836	2	Non
DB05688	2	Non
DB06700	2	Non
DB08918	2	Non
DB01104	2	Non
DB02670	2	Non
DB01126	2	Non
DB06791	2	Non
DB02365	2	Non
DB00168	2	Non
DB01207	2	Non
DB01583	2	Non
DB03176	2	Non
DB05035	2	Non
DB07425	2	Non
DB03355	2	Non
DB02256	2	Non
DB00299	2	Non
DB00577	2	Non
DB01004	2	Non
DB00724	2	Non
DB01611	2	Non
DB00762	2	Non
DB01030	2	Non
DB05129	2	Non
DB00380	2	Non
DB00694	2	Non
DB00773	2	Non
DB00970	2	Non
DB05022	2	Non
DB03132	2	Non
DB04143	2	Non
DB07732	2	Non
DB07745	2	Non
DB07748	2	Non
DB07773	2	Non
DB07890	2	Non
DB07894	2	Non
DB07925	2	Non
DB07951	2	Non
DB07952	2	Non
DB07953	2	Non
DB03543	2	Non
DB01831	2	Non
DB04537	2	Non
DB00643	2	Non
DB06772	2	Non
DB05483	2	Non
DB07437	2	Non
DB05041	2	Non
DB06098	2	Non
DB04640	2	Non
DB03564	2	Non
DB01967	2	Non
DB02191	2	Non
DB03916	2	Non
DB04154	2	Non
DB00609	2	Non
DB01299	2	Non
DB04732	2	Non
DB07238	2	Non
DB07582	2	Non
DB08012	2	Non
DB08013	2	Non
DB08014	2	Non
DB08017	2	Non
DB08273	2	Non
DB08295	2	Non
DB08701	2	Non
DB08723	2	Non
DB08728	2	Non
DB02590	1	Non
DB04028	1	Non
DB08245	1	Non
DB03931	1	Non
DB03299	1	Non
DB04511	1	Non
DB07814	1	Non
DB07815	1	Non
DB01777	1	Non
DB02931	1	Non
DB03341	1	Non
DB01699	1	Non
DB04235	1	Non
DB04877	1	Non
DB04881	1	Non
DB05449	1	Non
DB00672	1	Non
DB03196	1	Non
DB03870	1	Non
DB02567	1	Non
DB05489	1	Non
DB07831	1	Non
DB08043	1	Non
DB08339	1	Non
DB08350	1	Non
DB08583	1	Non
DB03772	1	Non
DB04678	1	Non
DB04679	1	Non
DB04680	1	Non
DB04681	1	Non
DB07341	1	Non
DB07357	1	Non
DB07378	1	Non
DB07633	1	Non
DB09069	1	Non
DB02859	1	Non
DB03781	1	Non
DB07870	1	Non
DB01675	1	Non
DB03415	1	Non
DB08075	1	Non
DB08076	1	Non
DB08144	1	Non
DB08145	1	Non
DB08146	1	Non
DB08314	1	Non
DB08315	1	Non
DB08316	1	Non
DB08317	1	Non
DB08318	1	Non
DB01735	1	Non
DB01804	1	Non
DB03053	1	Non
DB04212	1	Non
DB00178	1	Non
DB00492	1	Non
DB00519	1	Non
DB00542	1	Non
DB00584	1	Non
DB00790	1	Non
DB00881	1	Non
DB01180	1	Non
DB01340	1	Non
DB01348	1	Non
DB08836	1	Non
DB05358	1	Non
DB01122	1	Non
DB01400	1	Non
DB02166	1	Non
DB02226	1	Non
DB02404	1	Non
DB02673	1	Non
DB02825	1	Non
DB03005	1	Non
DB03359	1	Non
DB04021	1	Non
DB04114	1	Non
DB04556	1	Non
DB04614	1	Non
DB04615	1	Non
DB04616	1	Non
DB04617	1	Non
DB04859	1	Non
DB05510	1	Non
DB07555	1	Non
DB07701	1	Non
DB07756	1	Non
DB07822	1	Non
DB07846	1	Non
DB08615	1	Non
DB08996	1	Non
DB04624	1	Non
DB03964	1	Non
DB04072	1	Non
DB03390	1	Non
DB03577	1	Non
DB08404	1	Non
DB08405	1	Non
DB03230	1	Non
DB08326	1	Non
DB03021	1	Non
DB03616	1	Non
DB03850	1	Non
DB03903	1	Non
DB04151	1	Non
DB04629	1	Non
DB04774	1	Non
DB04775	1	Non
[truncated: 6,143 more rows]
